# Supplementary material for: A copper-mediated cyclization reaction of hydrazine with enediynones providing pyrazolo[1,5-a]pyridines
Source: Royal Society of Chemistry journal article supplement (doi:10.1039/c0ob00756k), 2010-12-01

# Supporting Information

## The Copper-Mediated Cyclization Reaction of Hydrazine with Enehydrones Provides Pyrazolo[1,5-*a*]pyridines†

Hung-Chou Wu<sup>a</sup>, Long-Chih Hwang<sup>a</sup> and Ming-Jung Wu<sup>b,\*</sup>

<sup>a</sup>*Department of Medicinal and Applied Chemistry, Kaohsiung Medical University, Kaohsiung, Taiwan*

<sup>b</sup>*Department of Chemistry, National Sun Yat-sen University, Kaohsiung, Taiwan*

*Fax: 886-7-5253909; E-mail: [mijuwu@faculty.nsysu.edu.tw](mailto:mijuwu@faculty.nsysu.edu.tw)*

### Table of Contents

|             |                                                |
|-------------|------------------------------------------------|
| P. S1.      | General procedures                             |
| P. S2-20.   | Data of compound <b>1a-r</b> and <b>8a-r</b> . |
| P. S15-17.  | X-ray data for <b>8j</b>                       |
| P. S20-24.  | X-ray data for <b>9a</b> and <b>9e</b>         |
| P. S24.     | References                                     |
| P. S25-113. | Spectra data of compounds                      |

### **General procedure for the synthesis of enediynes (1)**

Manganese dioxide (15 mmol) was added to solution of enediynols (**6**) (1 mmol) in CH<sub>2</sub>Cl<sub>2</sub> (10 ml). The reaction mixture was stirred at room temperature for 2 h. The solution was filtered through MgSO<sub>4</sub> and silica gel on cotton plug and washed with dichloromethane. After removal of solvent, the residue was purified by column chromatography to give the products.

### **General procedure for the synthesis of vinyl chlorides (4)**

Terminal alkynes (**3**) (5 mmol), *cis*-1,2-dichloroethylene (**2**) (7.5 mmol), Pd(PPh<sub>3</sub>)<sub>4</sub> (5 mol %), CuI (5 mol %), and *n*-BuNH<sub>2</sub> (10 mmol) in ether (10 mL) were stirred at room temperature for 2 h. The saturated aqueous solutions of NH<sub>4</sub>Cl and Na<sub>2</sub>CO<sub>3</sub> were added subsequently into the reaction mixture and extracted with ethyl acetate. The combined organic extracts were dried over anhydrous MgSO<sub>4</sub>. After filtration and removal of solvent, the residue was purified by column chromatography to give the products.

### **General procedure for the synthesis of pyrazolo[1,5-*a*]pyridines (8)**

Hydrazine monohydrate (0.3 mmol) was added to a solution of enediynes (0.15 mmol) in CH<sub>3</sub>CN (5 ml). The reaction mixture was stirred at 60 °C for 1 h, copper(I) chloride (0.15 mmol) was then added to the reaction mixture and stirred for an additional 30 h at refluxing temperature under nitrogen. After cooling to room temperature, the solution was filtered through MgSO<sub>4</sub> and silica gel on cotton plug and washed with ethyl acetate. After removal of solvent, the residue was purified by column chromatography to give the products.

### **Data of compounds 4**

**Compounds 4a~4f, 4j, and 4l, see references [1]~[5].**

**(Z)-1-(4-chlorobut-3-en-1-yn-1-yl)-2-methylbenzene (4g)**

brown liquid;  $R_f = 0.72$  (*n*-hexane as eluent );

$^1\text{H}$  NMR ( $\text{CDCl}_3$ , 300 MHz ) :  $\delta$  7.46 (d,  $J = 7.5$  Hz, 1H), 7.13-7.25 (m, 3H), 6.45 (d,  $J = 7.5$  Hz, 1H), 6.13 (d,  $J = 7.2$  Hz, 1H), 2.5 (s, 3H) ppm; HRMS (EI) calcd. for  $\text{C}_{11}\text{H}_9\text{Cl}$  176.0393, found 176.0395.

**(Z)-1-(4-chlorobut-3-en-1-yn-1-yl)-3-methylbenzene (4h)**

brown liquid;  $R_f = 0.68$  (*n*-hexane as eluent );

$^1\text{H}$  NMR ( $\text{CDCl}_3$ , 500 MHz ) :  $\delta$  7.15-7.36 (m, 4H), 6.43 (d,  $J = 7.5$  Hz, 1H), 6.09 (d,  $J = 7.5$  Hz, 1H), 2.35 (s, 3H);  $^{13}\text{C}$  NMR ( $\text{CDCl}_3$ , 125MHz) :  $\delta$  138.1, 132.9, 132.2, 130.1, 129.6, 128.7, 123.2, 123.1, 122.5, 112.1, 21.2 ppm; HRMS (EI) calcd. for  $\text{C}_{11}\text{H}_9\text{Cl}$  176.0393, found 176.0395.

**(Z)-1-(4-chlorobut-3-en-1-yn-1-yl)-3-methoxybenzene (4k)**

brown liquid;  $R_f = 0.67$  (*n*-hexane as eluent );

$^1\text{H}$  NMR ( $\text{CDCl}_3$ , 500 MHz ) :  $\delta$  7.24 (d,  $J = 8.0$  Hz, 1H), 7.10 (d,  $J = 7.5$  Hz, 1H), 7.02 (s, 1H), 6.91 (dd,  $J = 8.0, 2.5$  Hz, 1H), 6.45 (d,  $J = 7.5$  Hz, 1H), 6.09 (d,  $J = 7.5$  Hz, 1H), 3.82 (s, 3H);  $^{13}\text{C}$  NMR ( $\text{CDCl}_3$ , 125MHz) :  $\delta$  159.3, 129.4, 128.4, 124.3, 123.6, 116.3, 115.4, 112.0, 97.2, 83.0, 55.3 ppm; HRMS (EI) calcd. for  $\text{C}_{11}\text{H}_9\text{ClO}$  192.0342, found 192.0344.

**Data of compounds 6**

**(Z)-1-Phenyltrideca-4-en-2,6-diyn-1-ol (6a)**

brown liquid;  $R_f = 0.52$  (*n*-hexane/ethyl acetate = 10/1 as eluent );

$^1\text{H}$  NMR ( $\text{CDCl}_3$ , 500 MHz ) :  $\delta$  7.62 (d,  $J = 7.0$  Hz, 2H), 7.32-7.40 (m, 3H), 5.88 (td,

$J = 10.5, 2.0$  Hz, 1H), 5.82 (dd,  $J = 11.0, 2.0$  Hz, 1H), 5.65 (s, 1H), 2.53 (s, 1H), 2.38 (td,  $J = 7.0, 2.0$  Hz, 2H), 1.54 (m,  $J = 7.0$  Hz, 2H), 123-1.43 (m, 6H), 0.89 (t,  $J = 7.0$  Hz, 3H);  $^{13}\text{C}$  NMR ( $\text{CDCl}_3$ , 125MHz) :  $\delta$  140.39, 128.48(2C), 128.29, 126.78(2C), 121.38, 117.34, 99.55, 95.13, 84.15, 78.06, 65.06, 31.26, 28.54, 28.52, 22.47, 19.74, 14.01 ppm; HRMS (EI) calcd. for  $\text{C}_{19}\text{H}_{22}\text{O}$  266.1671, found 266.1672.

**(Z)-1-Phenylundeca-4-en-2,6-diyn-1-ol (6b)**

brown liquid;  $R_f = 0.53$  (*n*-hexane/ethyl acetate = 10/1 as eluent );

$^1\text{H}$  NMR ( $\text{CDCl}_3$ , 500 MHz) :  $\delta$  7.62 (d,  $J = 7.5$  Hz, 2H), 7.32-7.40 (m, 3H), 5.87 (dt,  $J = 11.0, 2.0$  Hz, 1H), 5.82 (dd,  $J = 11.0, 2.0$  Hz, 1H), 5.65 (s, 1H), 2.59 (s, 1H), 2.39, (td,  $J = 7.0, 2.0$  Hz, 2H), 1.40-1.56 (m, 4H), 0.90 (t,  $J = 7.0$  Hz, 3H);  $^{13}\text{C}$  NMR ( $\text{CDCl}_3$ , 125MHz) :  $\delta$  140.38, 128.47(2C), 128.26, 126.76(2C), 121.33, 117.37, 99.43, 95.15, 84.11, 78.09, 65.03, 30.55, 21.88, 19.38, 13.51 ppm; HRMS (EI) calcd. for  $\text{C}_{17}\text{H}_{18}\text{O}$  238.1358, found 238.11360.

**(Z)-1-phenyldodeca-4-en-2,6-diyn-1-ol (6c)**

brown liquid;  $R_f = 0.58$  (*n*-hexane/ethyl acetate = 10/1 as eluent );

$^1\text{H}$  NMR ( $\text{CDCl}_3$ , 200 MHz) :  $\delta$  7.34-7.63 (m, 5H), 5.77-5.91 (m, 2H), 5.65 (d,  $J = 5.8$  Hz, 1H), 2.38 (td,  $J = 7.0, 1.6$  Hz, 2H), 2.28 (s, 1H), 1.22-1.62 (m, 6H), 0.88 (t,  $J = 6.8$  Hz, 3H) ppm; HRMS (EI) calcd. for  $\text{C}_{18}\text{H}_{20}\text{O}$  252.1514, found 252.1512.

**(Z)-9-Methyl-1-phenyldeca-4-en-2,6-diyn-1-ol (6d)**

brown liquid;  $R_f = 0.56$  (*n*-hexane/ethyl acetate = 10/1 as eluent );

$^1\text{H}$  NMR ( $\text{CDCl}_3$ , 200 MHz) :  $\delta$  7.59 (dd,  $J = 8.0, 2.2$  Hz, 2H), 7.41-7.35 (m, 3H), 5.87-5.84 (m, 2H), 5.65 (s, 1H), 2.28 (dd,  $J = 6.6, 1.8$  Hz, 2H), 1.83 (m, 1H), 0.98 (d,  $J = 7.0$  Hz, 6H);  $^{13}\text{C}$  NMR ( $\text{CDCl}_3$ , 50MHz) :  $\delta$  143.8, 129.0 (2C), 127.7, 127.2 (2C),

122.1, 118.9, 92.8, 91.1, 84.9, 79.8, 31.8, 28.5, 22.0 (2C) ppm; HRMS (EI) calcd. for C<sub>17</sub>H<sub>18</sub>O 238.1358, found 238.1360.

**(Z)-8,8-Dimethyl-1-phenylnona-4-en-2,6-diyn-1-ol (6e)**

brown liquid;  $R_f = 0.57$  ( *n*-hexane/ethyl acetate = 10/1 as eluent );

<sup>1</sup>H NMR (CDCl<sub>3</sub>, 300 MHz ) : δ 7.60 (d,  $J = 6.6$  Hz, 2H), 7.32-7.41 (m, 3H), 5.78-5.89 (m, 2H), 5.66 (d,  $J = 5.7$  Hz, 1H), 2.29 (d,  $J = 6.3$  Hz, 1H), 1.24 (s, 9H) ;

<sup>13</sup>C NMR (CDCl<sub>3</sub>, 50MHz) : δ 144.8, 129.0 (2C), 127.6, 127.1 (2C), 118.5, 105.9, 91.1, 84.9, 77.9, 61.8, 31.2 (3C), 28.6 ppm; HRMS (EI) calcd. for C<sub>17</sub>H<sub>18</sub>O 238.1358, found 238.1359.

**(Z)-1,7-Diphenylhepta-4-en-2,6-diyn-1-ol (6f)**

brown liquid;  $R_f = 0.52$  ( *n*-hexane/ethyl acetate = 10/1 as eluent );

<sup>1</sup>H NMR (CDCl<sub>3</sub>, 200 MHz ) : δ 7.67-7.29 (m, 10H), 6.11 (d,  $J = 10.8$  Hz, 1H), 5.95 (dd,  $J = 10.6, 1.4$  Hz, 1H), 2.04 (s, 1H) ; <sup>13</sup>C NMR (CDCl<sub>3</sub>, 50MHz) : δ 132.3 (2C), 129.0 (2C), 128.5, 128.4 (2C), 127.1 (2C), 122.6, 121.1, 118.9, 94.7, 93.1, 91.1, 84.9, 61.8 ppm; HRMS (EI) calcd. for C<sub>19</sub>H<sub>14</sub>O 258.1045, found 258.1048.

**(Z)-1-phenyl-7-o-tolylhepta-4-en-2,6-diyn-1-ol (6g)**

brown liquid;  $R_f = 0.51$  ( *n*-hexane/ethyl acetate = 10/1 as eluent );

<sup>1</sup>H NMR (CDCl<sub>3</sub>, 400 MHz ) : δ 7.61-7.10 (m, 9H), 6.14 (d,  $J = 10.8$  Hz, 1H), 5.92 (dd,  $J = 10.8, 1.6$  Hz, 1H), 5.68 (d,  $J =$  Hz, 1H), 2.40 (s, 3H); <sup>13</sup>C NMR (CDCl<sub>3</sub>, 100MHz) : δ 140.4, 140.2, 132.1, 129.4, 128.7, 128.6 (2C), 128.4, 126.7 (2C), 125.5, 122.5, 120.7, 118.1, 96.4, 96.3, 90.6, 84.2, 65.2, 20.7 ppm; HRMS (EI) calcd. for C<sub>20</sub>H<sub>16</sub>O 272.1201, found 272.1203.

**(Z)-1-phenyl-7-m-tolylhepta-4-en-2,6-diyn-1-ol (6h)**

brown liquid;  $R_f = 0.52$  ( *n*-hexane/ethyl acetate = 10/1 as eluent );

$^1\text{H}$  NMR ( $\text{CDCl}_3$ , 400 MHz ) :  $\delta$  7.66-7.13 (m, 9H), 6.10 (d,  $J = 10.8$  Hz, 1H), 5.94 (dd,  $J = 10.8, 2$  Hz, 1H), 5.70 (s, 1H), 2.30 (s, 3H);  $^{13}\text{C}$  NMR ( $\text{CDCl}_3$ , 100MHz) :  $\delta$  140.3, 137.9, 132.3, 129.6, 128.9, 1128.6 (2C), 128.3, 128.2, 126.7 (2C), 122.5, 120.7, 118.4, 97.7, 96.3, 86.4, 84.1, 65.2, 21.1 ppm; HRMS (EI) calcd. for  $\text{C}_{20}\text{H}_{16}\text{O}$  272.1201, found 272.1202.

**(Z)-7-(2-methoxyphenyl)-1-phenylhepta-4-en-2,6-diyn-1-ol (6j)**

brown liquid;  $R_f = 0.53$  ( *n*-hexane/ethyl acetate = 10/1 as eluent );

$^1\text{H}$  NMR ( $\text{CDCl}_3$ , 500 MHz ) :  $\delta$  7.63 (dd,  $J = 7.5, 2.5$  Hz, 2H), 7.29-7.36 (m, 4H), 6.87-6.91 (m, 2H), 6.17 (d,  $J = 10.5$  Hz, 1H), 5.93 (dd,  $J = 11.0, 2.0$  Hz, 1H), 5.69 (d,  $J = 3.0$  Hz, 1H), 3.83 (s, 1H), 2.58 (d,  $J = 5.5$  Hz, 1H);  $^{13}\text{C}$  NMR ( $\text{CDCl}_3$ , 125MHz) :  $\delta$  159.87, 140.35, 133.99, 130.28, 128.57(2C), 128.30, 126.81(2C), 121.03, 120.60, 118.10, 112.09, 110.83, 96.49, 93.96, 90.90, 84.42, 65.16, 55.90 ppm; HRMS (EI) calcd. for  $\text{C}_{20}\text{H}_{16}\text{O}_2$  288.1150, found 288.1151.

**(Z)-7-(4-methoxyphenyl)-1-phenylhepta-4-en-2,6-diyn-1-ol (6l)**

brown liquid;  $R_f = 0.54$  ( *n*-hexane/ethyl acetate = 10/1 as eluent );

$^1\text{H}$  NMR ( $\text{CDCl}_3$ , 200 MHz ) :  $\delta$  7.62-7.67 (m, 2H), 7.30-7.36 (m, 2H), 6.79-6.85 (m, 2H), 6.09 (d,  $J = 10.6$  Hz, 1H), 5.90 (dd,  $J = 11.0, 1.8$  Hz, 1H), 5.70 (d,  $J = 4.6$  Hz, 1H), 3.81 (s, 3H), 2.39 (d,  $J = 6.2$  Hz, 1H) ppm; HRMS (EI) calcd. for  $\text{C}_{20}\text{H}_{16}\text{O}_2$  288.1150, found 288.1152.

**(Z)-7-(4-nitrophenyl)-1-phenylhepta-4-en-2,6-diyn-1-ol (6m)**

Yellow solid; m.p.: 88-90 °C  $R_f = 0.42$  ( *n*-hexane/ethyl acetate = 10/1 as eluent );

$^1\text{H}$  NMR ( $\text{CDCl}_3$ , 300 MHz) :  $\delta$  8.14 (d,  $J = 9$  Hz, 2H), 7.60-7.64 (m, 2H), 7.45 (d,  $J = 8.7$  Hz, 3H), 7.34-7.36 (m, 3H), 6.09 (m, 2H), 5.71 (d,  $J = 5.4$  Hz, 1H), 2.34 (d,  $J = 4.2$  Hz, 1H) ppm; HRMS (EI) calcd. for  $\text{C}_{19}\text{H}_{13}\text{NO}_3$  303.0895, found 303.0897.

**(Z)-7-(4-hexylphenyl)-1-(4-methoxyphenyl)hepta-4-en-2,6-diyn-1-ol (6n)**

brown liquid;  $R_f = 0.58$  (*n*-hexane/ethyl acetate = 10/1 as eluent);

$^1\text{H}$  NMR ( $\text{CDCl}_3$ , 300 MHz) :  $\delta$  7.54 (d,  $J = 8.7$  Hz, 2H), 6.91 (d,  $J = 8.7$  Hz, 2H), 5.79-5.89 (m, 2H), 5.60 (d,  $J = 5.4$  Hz), 3.81 (s, 3H), 2.38 (td,  $J = 7.2, 1.8$  Hz, 2H), 2.14 (d,  $J = 6.3$  Hz, 1H), 1.23-1.55 (m, 8H), 0.87 (t,  $J = 6.9$  Hz, 3H) ppm; HRMS (EI) calcd. for  $\text{C}_{20}\text{H}_{22}\text{O}_2$  296.1776, found 196.1777.

**(Z)-1-(4-methoxyphenyl)-7-phenylhepta-4-en-2,6-diyn-1-ol (6o)**

brown liquid;  $R_f = 0.55$  (*n*-hexane/ethyl acetate = 10/1 as eluent);

$^1\text{H}$  NMR ( $\text{CDCl}_3$ , 300 MHz) :  $\delta$  7.56 (d,  $J = 8.7$  Hz, 2H), 7.28-7.41 (m, 5H), 6.82 (d,  $J = 8.7$  Hz, 2H), 6.10 (d,  $J = 10.8$ , 1H), 5.96 (dd,  $J = 10.8, 1.5$  Hz, 1H), 3.76 (s, 3H), 2.19 (d,  $J = 6$  Hz, 1H) ppm; HRMS (EI) calcd. for  $\text{C}_{20}\text{H}_{16}\text{O}_2$  288.1150, found 288.1152.

**(Z)-1,7-bis(4-methoxyphenyl)hepta-4-en-2,6-diyn-1-ol (6p)**

brown liquid;  $R_f = 0.53$  (*n*-hexane/ethyl acetate = 10/1 as eluent);

$^1\text{H}$  NMR ( $\text{CDCl}_3$ , 300 MHz) :  $\delta$  7.56 (d,  $J = 6.9$  Hz, 2H), 7.32 (d,  $J = 6.3$ , 2H), 6.83 (m, 4H), 6.08 (d,  $J = 10.8$  Hz, 1H), 5.90 (dd,  $J = 10.8, 1.8$  Hz, 1H), 5.64 (d,  $J = 5.7$  Hz, 1H), 3.81 (s, 3H), 3.77 (s, 3H), 2.24 (d,  $J = 6.3$  Hz, 1H) ppm; HRMS (EI) calcd. for  $\text{C}_{22}\text{H}_{18}\text{O}_3$  318.1256, found 318.1257.

**(Z)-4-(7-hydroxy-7-(4-methoxyphenyl)hepta-3-en-1,5-diyn-1-yl)benzotrile (6q)**

brown liquid;  $R_f = 0.50$  ( *n*-hexane/ethyl acetate = 10/1 as eluent );

$^1\text{H}$  NMR ( $\text{CDCl}_3$ , 300 MHz ) :  $\delta$  7.50-7.55 (m, 4H), 7.39 (d,  $J = 8.4$  Hz, 2H), 6.84 (d,  $J = 8.7$  Hz, 2H), 6.02-6.11 (m, 2H), 5.64 (d,  $J = 5.7$  Hz, 1H), 3.79 (s, 3H), 2.23 (d,  $J = 5.4$  Hz, 1H) ppm; HRMS (EI) calcd. for  $\text{C}_{20}\text{H}_{21}\text{F}_3\text{O}$  334.1544, found 334.1546.

### Data of compounds 1

#### (Z)-1-Phenyltrideca-4-en-2,6-diyn-1-one (1a)

brown liquid;  $R_f = 0.62$  ( *n*-hexane/ethyl acetate = 20/1 as eluent );  $^1\text{H}$  NMR ( $\text{CDCl}_3$ , 400 MHz ) :  $\delta$  8.23 ( $J = 7.8$ Hz, 2H), 7.66-7.43 (m, 3H), 6.21 (dt,  $J = 10.6, 2.2$  Hz, 1H), 5.98 (d,  $J = 10.6$  Hz, 1H), 2.48 (td,  $J = 6.8, 2.2$  Hz, 2H), 1.66-1.20 (m, 8H), 0.85 (t,  $J = 6.6$  Hz, 3H) ;  $^{13}\text{C}$  NMR ( $\text{CDCl}_3$ , 100MHz) :  $\delta$  177.9, 135.2, 134.7, 129.9 (2C), 128.5 (2C), 122.8, 117.3, 109.1, 93.8, 89.9, 30.9, 30.2, 28.1, 26.3, 22.2, 14.1 ppm; HRMS (EI) calcd. for  $\text{C}_{19}\text{H}_{20}\text{O}$  264.1514, found 264.1516.

#### (Z)-1-Phenylundeca-4-en-2,6-diyn-1-one (1b)

brown liquid;  $R_f = 0.64$  ( *n*-hexane/ethyl acetate = 20/1 as eluent );  $^1\text{H}$  NMR ( $\text{CDCl}_3$ , 400 MHz ) :  $\delta$  8.24 (d,  $J = 7.8$  Hz, 2H), 7.61 (t,  $J = 7.2$ Hz, 2H), 7.47 (t,  $J = 7.0$ Hz, 1H), 6.19 (dt,  $J = 10.6, 2.2$  Hz, 1H), 5.98 (d,  $J = 10.6$ , 1H), 2.47 (td,  $J = 8.8, 1.8$  Hz, 2H), 1.65-1.37 (m, 4H), 0.87 (t,  $J = 6.8$  Hz, 3H) ;  $^{13}\text{C}$  NMR ( $\text{CDCl}_3$ , 100MHz) :  $\delta$  177.5, 135.1, 134.6, 129.7 (2C), 128.4 (2C), 126.8, 115.6, 109.3, 93.8, 89.9, 31.2, 21.5, 18.9, 14.8 ppm; HRMS (EI) calcd. for  $\text{C}_{17}\text{H}_{16}\text{O}$  236.1201, found 236.1200.

#### (Z)-9-Methyl-1-phenyldeca-4-en-2,6-diyn-1-one (1d)

Yellow green liquid;  $R_f = 0.66$  ( *n*-hexane/ethyl acetate = 20/1 as eluent );  $^1\text{H}$  NMR ( $\text{CDCl}_3$ , 400 MHz ) :  $\delta$  8.24 (d,  $J = 7.8$  Hz, 2H), 7.61 (t,  $J = 7.2$  Hz, 2H), 7.47 (t,  $J = 7.0$  Hz, 1H), 6.18 (dt,  $J = 10.6, 2.2$  Hz, 1H), 5.98 (d,  $J = 10.6$  Hz, 1H), 2.36 (dd,  $J =$



8.8, 2.2 Hz, 2H), 1.87 (m,  $J = 6.6$  Hz, 1H), 0.98 (d,  $J = 6.6$  Hz, 6H) ;  $^{13}\text{C}$  NMR ( $\text{CDCl}_3$ , 100MHz) :  $\delta$  177.8, 136.7, 134.6, 129.8 (2C), 128.5 (2C), 126.8, 115.7, 102.1, 92.1, 90.1, 79.1, 29.1, 28.1, 22.0 (2C) ppm; HRMS (EI) calcd. for 236.1201, found 236.1200; Chemical Formula:  $\text{C}_{17}\text{H}_{16}\text{O}$

**(Z)-8,8-Dimethyl-1-phenylnona-4-en-2,6-diyn-1-one (1e)**

brown liquid;  $R_f = 0.62$  ( *n*-hexane/ethyl acetate = 20/1 as eluent );  $^1\text{H}$  NMR ( $\text{CDCl}_3$ , 400 MHz ) :  $\delta$  8.23 (d,  $J = 7.4$ Hz, 2H), 7.61-7.47 (m, 3H), 6.17 (d,  $J = 10.6$  Hz, 1H), 5.98 (d,  $J = 10.6$  Hz, 1H), 1.30 (s, 9H) ;  $^{13}\text{C}$  NMR ( $\text{CDCl}_3$ , 100MHz) :  $\delta$  177.6, 135.1, 134.6, 129.7 (2C), 128.4 (2C), 124.3, 115.5, 103.9, 93.8, 89.9, 78.9, 31.2 (3C), 28.6ppm; HRMS (EI) calcd. for  $\text{C}_{17}\text{H}_{16}\text{O}$  236.1201, found 236.1199.

**(Z)-1,7-Diphenylhepta-4-en-2,6-diyn-1-one (1f)**

brown liquid;  $R_f = 0.55$  ( *n*-hexane/ethyl acetate = 20/1 as eluent );  $^1\text{H}$  NMR ( $\text{CDCl}_3$ , 400 MHz ) :  $\delta$  8.25 (d,  $J = 7.8$  Hz, 2H), 7.55-7.30 (m, 8H), 6.42 (d,  $J = 10.6$  Hz, 1H), 6.12 (d,  $J = 10.6$  Hz, 1H) ;  $^{13}\text{C}$  NMR ( $\text{CDCl}_3$ , 100MHz) :  $\delta$  177.9, 135.6, 134.1, 130.1 (2C), 129.7 (2C), 129.3 (2C), 128.2 (2C), 127.8, 124.5, 117.3, 112.5, 109.7, 93.8 ppm; HRMS (EI) calcd. for  $\text{C}_{19}\text{H}_{12}\text{O}$  256.0888, found 256.0891.

**(Z)-1-phenyl-7-o-tolylhepta-4-en-2,6-diyn-1-one (1g)**

brown liquid;  $R_f = 0.54$  ( *n*-hexane/ethyl acetate = 20/1 as eluent );  $^1\text{H}$  NMR ( $\text{CDCl}_3$ , 400 MHz ) :  $\delta$  8.23 (d,  $J = 7.2$  Hz, 2H), 7.54-7.22 (m, 7H), 6.46 (d,  $J = 10.8$  Hz, 1H), 6.13 (d,  $J = 10.8$  Hz, 1H), 2.43 (s, 3H) ;  $^{13}\text{C}$  NMR ( $\text{CDCl}_3$ , 100MHz) :  $\delta$  177.7, 140.8, 136.6, 134.0, 132.3, 129.7 (2C), 129.6, 129.3, 128.6, 128.5 (2C), 125.6, 116.2, 99.5, 92.9, 91.0, 90.3, 20.7 ppm; HRMS (EI) calcd. for  $\text{C}_{12}\text{H}_{14}\text{O}$  270.1045, found 270.1046.

**(Z)-1-phenyl-7-m-tolylhepta-4-en-2,6-diyn-1-one (1h)**

brown liquid;  $R_f = 0.58$  ( *n*-hexane/ethyl acetate = 20/1 as eluent );  $^1\text{H}$  NMR ( $\text{CDCl}_3$ , 400 MHz ) :  $\delta$  8.29 (d,  $J = 7.2$  Hz, 2H), 7.55 (t,  $J = 7.2$  Hz, 1H), 7.36-7.18 (m, 6H), 6.42 (d,  $J = 10.8$  Hz, 1H), 6.13 (d,  $J = 10.8$  Hz, 1H), 2.30 (s, 3H) ;  $^{13}\text{C}$  NMR ( $\text{CDCl}_3$ , 100MHz) :  $\delta$  177.7, 138.1, 136.7, 134.0, 132.4, 130.2, 129.7 (2C), 129.0, 128.6, 128.5 (2C), 128.3, 126.3, 116.6, 100.9, 92.9, 89.7, 86.4, 21.1 ppm; HRMS (EI) calcd. for  $\text{C}_{12}\text{H}_{14}\text{O}$  270.1045, found 270.1043.

**(Z)-1-phenyl-7-(p-tolyl)hepta-4-en-2,6-diyn-1-one (1i)**

brown solid; m.p.: 46-48 °C  $R_f = 0.62$  ( *n*-hexane/ethyl acetate = 20/1 as eluent );  $^1\text{H}$  NMR ( $\text{CDCl}_3$ , 400 MHz ) :  $\delta$  8.27 (d,  $J = 7.2$  Hz, 2H), 7.56 (t,  $J = 7.2$  Hz, 1H), 7.47-7.34 (m, 4H), 6.86 (d,  $J = 8.4$  Hz, 2H), 6.40 (d,  $J = 10.8$  Hz, 1H), 6.06 (d,  $J = 10.8$  Hz, 1H), 3.82 (s, 3H);  $^{13}\text{C}$  NMR ( $\text{CDCl}_3$ , 100MHz) :  $\delta$  177.7, 160.4, 136.7, 133.9, 133.5 (2C), 129.6 (2C), 129.4, 128.7, 129.5 (2C), 126.6, 115.6, 114.1 (2C), 101.2, 92.8, 90.1, 86.0, 55.3 ppm; HRMS (EI) calcd. for  $\text{C}_{20}\text{H}_{14}\text{O}_2$  286.0994, found 286.0991.

**(Z)-7-(2-methoxyphenyl)-1-phenylhepta-4-en-2,6-diyn-1-one (1j)**

brown solid; m.p.: 40-42 °C  $R_f = 0.56$  ( *n*-hexane/ethyl acetate = 20/1 as eluent );  $^1\text{H}$  NMR ( $\text{CDCl}_3$ , 400 MHz ) :  $\delta$  8.28 (d,  $J = 7.2$  Hz, 2H), 7.53-7.27 (m, 5H), 6.90 (d,  $J = 8.4$  Hz, 1H), 6.96 (td,  $J = 7.4, 0.8$  Hz, 1H), 6.50 (d,  $J = 10.6$  Hz, 1H), 6.13 (d,  $J = 10.8$  Hz, 1H), 3.77 (s, 3H) ;  $^{13}\text{C}$  NMR ( $\text{CDCl}_3$ , 100MHz) :  $\delta$  177.8, 160.2, 136.7, 133.9, 130.9, 129.8 (2C), 128.4 (2C), 127.8, 126.5, 120.5, 116.2, 111.4, 110.6, 97.2, 91.3, 90.7, 90.0, 55.6 ppm; HRMS (EI) calcd. for  $\text{C}_{20}\text{H}_{14}\text{O}_2$  286.0994, found 286.0992.

**(Z)-7-(3-methoxyphenyl)-1-phenylhepta-4-en-2,6-diyn-1-one (1k)**

brown solid; m.p.: 48-50 °C  $R_f = 0.52$  ( *n*-hexane/ethyl acetate = 20/1 as eluent );  $^1\text{H}$

NMR (CDCl<sub>3</sub>, 500 MHz) :  $\delta$  8.27 (dd,  $J$  = 8.5, 1.5 Hz, 2H), 7.55 (t,  $J$  = 7.5Hz, 1H), 7.35 (t,  $J$  = 7.5Hz, 2H), 7.28-7.24 (m, 2H), 7.13 (dt,  $J$  = 7.5, 1 Hz, 1H), 7.05 (dd,  $J$  = 2.5, 1.5 Hz, 2H), 6.94 (ddd,  $J$  = 8, 2.5, 1 Hz, 1H), 6.41 (d,  $J$  = 10.5, 1H), 6.13 (d,  $J$  = 10.5, 1H), 3.75 (s, 3H); <sup>13</sup>C NMR (CDCl<sub>3</sub>, 125MHz) :  $\delta$  177.7, 159.3, 136.7, 134.0, 129.7 (2C), 129.5, 128.6 (2C), 126.1, 124.4, 123.1, 117.0, 116.4, 116.2, 100.5, 93.0, 89.6, 86.5, 55.2 ppm; HRMS (EI) calcd. for C<sub>20</sub>H<sub>14</sub>O<sub>2</sub> 286.0994, found 286.0991.

**(Z)-7-(4-methoxyphenyl)-1-phenylhepta-4-en-2,6-diyn-1-one (1l)**

brown solid; m.p.: 46-48 °C  $R_f$  = 0.56 ( *n*-hexane/ethyl acetate = 20/1 as eluent ); <sup>1</sup>H NMR (CDCl<sub>3</sub>, 400 MHz) :  $\delta$  8.27 (d,  $J$  = 7.2 Hz, 2H), 7.56 (t,  $J$  = 7.2 Hz, 1H), 7.34-7.47 (m, 5H), 6.86 (d,  $J$  = 8.4 Hz, 2H), 6.40 (d,  $J$  = 10.8 Hz, 1H), 6.06 (d,  $J$  = 10.8 Hz, 1H), 3.82 (s, 3H); <sup>13</sup>C NMR (CDCl<sub>3</sub>, 100MHz) :  $\delta$  177.8, 160.5, 136.7, 133.9, 133.5(2C), 129.6(2C), 129.4, 128.5(2C), 126.6, 115.6, 114.1(2C), 101.2, 92.8, 90.1, 86.7, 55.3 ppm; HRMS (EI) calcd. for C<sub>20</sub>H<sub>14</sub>O<sub>2</sub> 286.0994, found 286.0992.

**(Z)-7-(4-nitrophenyl)-1-phenylhepta-4-en-2,6-diyn-1-one (1m)**

yellow solid; m.p.: 68-70 °C  $R_f$  = 0.48 ( *n*-hexane/ethyl acetate = 20/1 as eluent ); <sup>1</sup>H NMR (CDCl<sub>3</sub>, 500 MHz) :  $\delta$  8.20-8.24 (m, 4H), 7.59-7.67 (m, 3H), 7.41 (t,  $J$  = 7.5 Hz, 2H), 6.43 (d,  $J$  = 10.5 Hz, 1H), 6.24 (d,  $J$  = 10.5 Hz, 1H); <sup>13</sup>C NMR (CDCl<sub>3</sub>, 125MHz) :  $\delta$  177.5, 147.6, 136.6, 134.3, 132.7(2C), 129.6(2C), 128.9, 128.6(2C), 124.9, 123.7(2C), 119.1, 97.5, 93.7, 90.9, 88.8 ppm; HRMS (EI) calcd. for C<sub>19</sub>H<sub>11</sub>NO<sub>3</sub> 301.0379, found 301.0380.

**(Z)-1-(4-methoxyphenyl)trideca-4-en-2,6-diyn-1-one (1n)**

brown liquid;  $R_f$  = 0.58 ( *n*-hexane/ethyl acetate = 20/1 as eluent ); <sup>1</sup>H NMR (CDCl<sub>3</sub>, 500 MHz) :  $\delta$  8.22 (d,  $J$  = 9 Hz, 2H), 6.94 (d,  $J$  = 9 Hz, 2H), 6.14 (dt,  $J$  = 10.5, 2.5 Hz,

1H), 5.98 (d,  $J = 11$  Hz, 1H), 3.88 (s, 3H), 2.46 (td,  $J = 7.0, 2.0$  Hz, 2H), 1.58 (m,  $J = 7.5$  Hz, 2H), 1.23-1.43 (m, 6H), 0.85 (t,  $J = 7.0$  Hz, 3H);  $^{13}\text{C}$  NMR ( $\text{CDCl}_3$ , 125MHz) :  $\delta$  176.4, 164.3, 132.2(2C), 130.3, 126.3, 115.9, 113.7(2C), 102.7, 92.1, 89.3, 78.3, 55.5, 31.3, 28.6, 28.4, 22.4, 19.9, 13.9 ppm; HRMS (EI) calcd. for  $\text{C}_{20}\text{H}_{22}\text{O}_2$  294.1620, found 294.1621.

**(Z)-1-(4-methoxyphenyl)-7-phenylhepta-4-en-2,6-diyne-1-one (1o)**

brown liquid;  $R_f = 0.55$  ( *n*-hexane/ethyl acetate = 20/1 as eluent );  $^1\text{H}$  NMR ( $\text{CDCl}_3$ , 300 MHz ) :  $\delta$  8.24 (d,  $J = 9.0$  Hz, 2H), 7.32-7.55 (m, 5H), 6.76 (d,  $J = 9.0$  Hz, 1H), 6.39 (d,  $J = 10.5$  Hz, 1H), 6.13 (d,  $J = 10.8$  Hz, 1H), 3.80 (s, 3H) ppm; HRMS (EI) calcd. for  $\text{C}_{20}\text{H}_{14}\text{O}_2$  286.0994, found 286.0992.

**(Z)-1,7-bis(4-methoxyphenyl)hepta-4-en-2,6-diyne-1-one (1p)**

orange liquid;  $R_f = 0.48$  ( *n*-hexane/ethyl acetate = 20/1 as eluent );  $^1\text{H}$  NMR ( $\text{CDCl}_3$ , 500 MHz ) :  $\delta$  8.24 (d,  $J = 9$  Hz, 2H), 7.48 (d,  $J = 9$  Hz, 2H), 6.88 (d,  $J = 9$  Hz, 2H), 6.79 (d,  $J = 9$  Hz, 2H), 6.38 (d,  $J = 10.5$  Hz, 1H), 6.07 (d,  $J = 10.5$  Hz, 1H), 3.83 (s, 3H), 3.82 (s, 1H);  $^{13}\text{C}$  NMR ( $\text{CDCl}_3$ , 125MHz) :  $\delta$  176.4, 164.3, 160.4, 133.6 (2C), 132.1 (2C), 130.2, 126.1, 116.1, 114.4, 114.1 (2C), 113.8 (2C), 100.7, 93.0, 89.3, 86.1, 55.4, 55.3 ppm; HRMS (EI) calcd. for  $\text{C}_{21}\text{H}_{16}\text{O}_3$  316.1099, found 316.1099

**(Z)-4-(7-(4-methoxyphenyl)-7-oxohepta-3-en-1,5-diyne)benzotrile (1q)**

Yellow solid; m.p.: 56-58 °C  $R_f = 0.62$  ( *n*-hexane/ethyl acetate = 20/1 as eluent );  $^1\text{H}$  NMR ( $\text{CDCl}_3$ , 500 MHz ) :  $\delta$  8.18 (d,  $J = 9$  Hz, 2H), 7.64-7.59 (m, 4H), 6.83 (d,  $J = 9$  Hz, 2H), 6.38 (d,  $J = 10.5$  Hz, 1H), 6.20 (d,  $J = 10.5$  Hz, 1H), 3.85 (s, 3H);  $^{13}\text{C}$  NMR ( $\text{CDCl}_3$ , 125MHz) :  $\delta$  176.1, 164.5, 132.4 (2C), 132.1 (2C), 132.0 (2C), 130.0, 127.1, 124.5, 119.0, 118.2, 113.8 (2C), 112.4, 97.6, 93.8, 90.4, 88.2, 55.5 ppm; HRMS (EI)

calcd. for C<sub>21</sub>H<sub>13</sub>NO<sub>2</sub> 311.0946, found 311.0946.

**(Z)-1-(4-(trifluoromethyl)phenyl)trideca-4-en-2,6-diyne-1-one (1r)**

brown liquid; *R<sub>f</sub>* = 0.57 ( *n*-hexane/ethyl acetate = 20/1 as eluent ); <sup>1</sup>H NMR (CDCl<sub>3</sub>, 500 MHz ) : δ 8.37 (d, *J* = 8 Hz, 2H), 7.75 (d, *J* = 8 Hz, 2H), 6.23 (dt, *J* = 11, 2.5 Hz), 6.01 (d, *J* = 11Hz), 2.47 (td, *J* = 7.5, 2.5 Hz, 2H), 1.59 (quintet, *J* = 7.5 Hz, 2H), 1.40 (quintet, *J* = 7.5 Hz, 2H), 1.26 (m, 4H), 0.85 (t, *J* = 7 Hz, 3H); <sup>13</sup>C NMR (CDCl<sub>3</sub>, 125MHz) : δ 176.4, 139.3, 130.0 (2C), 127.8, 125.5 (quartet, *J* = 3.6 Hz), 115.3, 103.7, 91.5, 91.4, 78.3, 31.2, 28.6, 28.4, 22.4, 20.0, 13.9 ppm; HRMS (EI) calcd. for C<sub>20</sub>H<sub>19</sub>F<sub>3</sub>O 332.1388, found 332.1391.

**Data of compound 8a-8r**

**7-Hexyl-2-phenylpyrazolo[1,5-a]pyridine (8a)**

brown liquid; *R<sub>f</sub>* = 0.69 ( *n*-hexane/ethyl acetate = 10/1 as eluent ); <sup>1</sup>H NMR (CDCl<sub>3</sub>, 400 MHz ) : δ 8.03 (dt, *J* = 7.2, 1.2 Hz, 2H), 7.48-7.35 (m, 4H), 7.05 (dd, *J* = 9.2, 7.0 Hz, 1H), 6.28 (s, 1H), 6.58 (dt, *J* = 6.8, 0.8 Hz, 1H), 3.22 (t, *J* = 7.6 Hz, 2H), 1.92 (m, 2H), 1.52-1.25 (m, 8H), 0.93 (t, *J* = 7.2 Hz, 3H); <sup>13</sup>C NMR (CDCl<sub>3</sub>, 50MHz) : δ 152.6, 128.6 (2C), 128.1, 126.5 (3C), 123.3, 115.3, 109.6, 93.6, 31.6, 30.9, 29.6, 29.1, 26.1, 22.6, 14.8; <sup>13</sup>C NMR (CDCl<sub>3</sub>, 100MHz) : δ 152.5, 142.2, 133.7, 128.6 (2C), 128.1, 126.5 (2C), 123.2, 115.2, 109.5, 31.6, 30.9, 29.1, 26.1, 22.5, 14.0 ppm; HRMS (EI) calcd. for C<sub>19</sub>H<sub>22</sub>N<sub>2</sub> 278.1783, found 278.1780.

**7-Butyl-2-phenylpyrazolo[1,5-a]pyridine (8b)**

brown liquid; *R<sub>f</sub>* = 0.67 ( *n*-hexane/ethyl acetate = 10/1 as eluent ); <sup>1</sup>H NMR (CDCl<sub>3</sub>, 400 MHz ) : δ 8.11 (dt, *J* = 8.4, 1.8 Hz, 2H), 7.53-7.36 (m, 4H), 7.16 (dd, *J* = 9.0, 7.0 Hz, 1H), 6.80 (s, 1H), 6.65 (dt, *J* = 6.8, 0.8 Hz, 1H), 3.20 (t, *J* = 7.6 Hz, 2H), 1.90 (m,

$J = 7.2$  Hz, 2H), 1.60 (m,  $J = 7.0$  Hz, 2H), 1.02 (t,  $J = 7.4$ Hz, 3H) ;  $^{13}\text{C}$  NMR ( $\text{CDCl}_3$ , 100MHz) :  $\delta$  152.5, 142.2, 142.0 133.7, 128.6 (2C), 128.1, 126.5 (2C), 122.1, 116.5, 109.5, 93.4, 31.5, 31.4, 22.3, 14.1 ppm; HRMS (EI) calcd. for  $\text{C}_{17}\text{H}_{18}\text{N}_2$  250.1470, found 250.1469.

#### **7-pentyl-2-phenylpyrazolo[1,5-a]pyridine (8c)**

brown liquid;  $R_f = 0.61$  ( *n*-hexane/ethyl acetate = 10/1 as eluent ) ;  $^1\text{H}$  NMR ( $\text{CDCl}_3$ , 400 MHz ) :  $\delta$  8.04 (dt,  $J = 7.2$ , 1.6 Hz, 2H), 7.48-7.34 (m, 4H), 7.07 (dd,  $J = 8.8$ , 6.8 Hz, 1H), 6.82 (s, 1H), 6.59 (dt,  $J = 6.8$ , 0.8 Hz, 1H) 3.24 (t,  $J = 8$  Hz, 2H), 1.96 (q,  $J = 7.6$  Hz, 2H), 1.50 (m, 4H), 0.97 (t,  $J = 6.8$  Hz, 3H);  $^{13}\text{C}$  NMR ( $\text{CDCl}_3$ , 100MHz) :  $\delta$  152.5, 142.2, 142.0, 133.7, 128.6 (2C), 128,1, 126.5 (2C), 123.2, 115.2, 109.5, 93.6, 31.6, 30.9, 25.8, 22.4, 14.0 ppm; HRMS (EI) calcd. for  $\text{C}_{18}\text{H}_{20}\text{N}_2$  264.1626, found 264.1629.

#### **7-Isobutyl-2-phenylpyrazolo[1,5-a]pyridine (8d)**

brown liquid;  $R_f = 0.58$  ( *n*-hexane/ethyl acetate = 10/1 as eluent ) ;  $^1\text{H}$  NMR ( $\text{CDCl}_3$ , 400 MHz ) :  $\delta$  8.02 (dt,  $J = 6.8$ , 1.6 Hz, 2H), 7.49-7.30 (m, 4H), 7.05 (dd,  $J = 8.8$ , 6.8 Hz, 1H), 6.81 (s, 1H), 6.55 (dt,  $J = 7.0$ , 0.8 Hz, 1H), 3.08 (d,  $J = 7.0$  Hz, 2H), 2.50 (m,  $J = 6.8$  Hz, 1H), 1.03 (d,  $J = 6.6$  Hz, 6H) ;  $^{13}\text{C}$  NMR ( $\text{CDCl}_3$ , 100MHz) :  $\delta$  152.4, 142.1, 141.1, 128.6 (2C), 128.1, 126.5 (2C), 123.1, 115.4, 110.9, 93.5, 40.4, 25.3, 22.7 (2C) ppm; HRMS (EI) calcd. for  $\text{C}_{17}\text{H}_{18}\text{N}_2$  250.1470, found 250.1469.

#### **7-tert-butyl-2-phenylpyrazolo[1,5-a]pyridine (8e)**

brown liquid;  $R_f = 0.60$  ( *n*-hexane/ethyl acetate = 10/1 as eluent ) ;  $^1\text{H}$  NMR ( $\text{CDCl}_3$ , 400 MHz ) :  $\delta$  8.03 (dt,  $J = 6.8$ , 1.6 Hz, 2H), 7.47-7.33 (m, 4H), 7.04 (dd,  $J = 8.8$ , 6.8 Hz, 1H), 6.80 (s,1H), 6.65 (dd,  $J = 7.2$ , 1.2 Hz, 1H), 1.68 (s, 9H) ;  $^{13}\text{C}$  NMR ( $\text{CDCl}_3$ ,

100MHz) :  $\delta$  152.5, 142.2, 141.1, 133.7, 128.6 (2C), 128.1, 126.5 (2C), 122.1, 115.6, 109.5, 93.5, 31.7, 30.3 (3C) ppm; HRMS (EI) calcd. for C<sub>17</sub>H<sub>18</sub>N<sub>2</sub> 250.1470, found 250.1467.

### **2,7-Diphenylpyrazolo[1,5-a]pyridine (8f)**

brown liquid;  $R_f$  = 0.52 ( *n*-hexane/ethyl acetate = 10/1 as eluent ); <sup>1</sup>H NMR (CDCl<sub>3</sub>, 400 MHz ) :  $\delta$  8.10-8.02 (m, 4H), 7.56-7.35 (m, 7H), 7.18 (dd,  $J$  = 8.8, 7.0 Hz, 1H), 6.91 (s, 1H), 6.84 (dd,  $J$  = 7.0, 1.6 Hz, 1H) ; <sup>13</sup>C NMR (CDCl<sub>3</sub>, 100MHz) :  $\delta$  152.7, 142.7, 140.2, 133.6, 133.4, 129.3 (2C), 129.2, 128.5 (2C), 128.2, 128.1 (2C), 126.5 (2C), 123.4, 116.7, 112.4, 93.8 ppm; HRMS (EI) calcd. for C<sub>19</sub>H<sub>14</sub>N<sub>2</sub> 270.1157, found 270.1158.

### **2-phenyl-7-o-tolylpyrazolo[1,5-a]pyridine (8g)**

brown liquid;  $R_f$  = 0.48 ( *n*-hexane/ethyl acetate = 10/1 as eluent ); <sup>1</sup>H NMR (CDCl<sub>3</sub>, 400 MHz ) :  $\delta$  7.90 (dt,  $J$  = 8.8, 1.6 Hz, 2H), 7.55 (dd,  $J$  = 8.8, 12. Hz, 1H), 7.45-7.28 (m, 7H), 7.17 (dd,  $J$  = 8.8, 6.8 Hz, 1H), 6.88 (s, 1H), 6.67 (dd,  $J$  = 6.4, 1.2 Hz, 1H), 2.19 (s, 3H) ; <sup>13</sup>C NMR (CDCl<sub>3</sub>, 100MHz) :  $\delta$  153.1, 142.1, 140.9, 138.1, 133.9, 133.4, 130.0, 129.1, 128.4 (2C), 128.1, 126.5 (2C), 125.6, 123.1, 116.8, 112.9, 93.7, 19.8 ppm; HRMS (EI) calcd. for C<sub>20</sub>H<sub>16</sub>N<sub>2</sub> 284.1313, found 284.1311.

### **2-phenyl-7-m-tolylpyrazolo[1,5-a]pyridine (8h)**

brown liquid;  $R_f$  = 0.43 ( *n*-hexane/ethyl acetate = 10/1 as eluent ); <sup>1</sup>H NMR (CDCl<sub>3</sub>, 400 MHz ) :  $\delta$  7.58 (dt,  $J$  = 8.8, 1.2 Hz, 2H), 6.96-6.54 (m, 10H), 6.10 (s, 1H), 2.14 (s, 3H) ; <sup>13</sup>C NMR (CDCl<sub>3</sub>, 100MHz) :  $\delta$  155.4, 147.1, 136.9, 133.8, 131.5, 128.6, 128.2, 128.1, 127.7, 127.4 (2C), 126.8, 126.6 (2C), 105.1, 101.2, 92.5, 21.1 ppm; HRMS (EI) calcd. for C<sub>20</sub>H<sub>16</sub>N<sub>2</sub> 284.1313, found 284.1314.

### 2-phenyl-7-p-tolylpyrazolo[1,5-a]pyridine(8i)

brown liquid;  $R_f = 0.43$  ( *n*-hexane/ethyl acetate = 10/1 as eluent );  $^1\text{H}$  NMR ( $\text{CDCl}_3$ , 500 MHz ) :  $\delta$  8.00-7.96 (m, 4H), 7.51 (dd,  $J = 8.5$ , 1 Hz, 1H), 7.44 (t,  $J = 7.5$  Hz, 2H), 7.36-7.33 (m, 3H), 7.18 (dd,  $J = 8.5$ , 7 Hz, 1H), 6.89 (s, 1H), 6.83 (dd,  $J = 7$ , 1.5 Hz, 1H) 2.47 (s, 3H);  $^{13}\text{C}$  NMR ( $\text{CDCl}_3$ , 125MHz) :  $\delta$  152.7, 142.7, 140.4, 139.3, 133.5, 130.7, 129.2 (2C), 128.8 (2C), 128.5 (2C), 126.5 (2C), 123.5, 116.4, 112.1, 93.7 ppm; HRMS (EI) calcd. for  $\text{C}_{20}\text{H}_{16}\text{N}_2$  284.1313, found 284.1311.

### 7-(2-methoxyphenyl)-2-phenylpyrazolo[1,5-a]pyridine (8j)

White solid; m.p.: 165-167°C;  $R_f = 0.50$  ( *n*-hexane/ethyl acetate = 10/1 as eluent );  $^1\text{H}$  NMR ( $\text{CDCl}_3$ , 400 MHz ) :  $\delta$  7.91 (dt,  $J = 6.8$ , 1.6 Hz, 2H), 7.57-7.47 (m, 3H), 7.39-7.27 (m, 3H), 7.17-7.08 (m, 3H), 6.86 (s, 1H), 6.76 (dd,  $J = 6.8$ , 1.2 Hz, 1H), 3.79 (s, 3H) ;  $^{13}\text{C}$  NMR ( $\text{CDCl}_3$ , 100MHz) :  $\delta$  157.8, 142.1, 131.2, 130.6, 128.4 (2C), 128.0, 126.5 (2C), 123.0, 120.5, 116.8, 113.2, 111.6, 93.6, 55.8 ppm; HRMS (EI) calcd. for  $\text{C}_{20}\text{H}_{16}\text{N}_2\text{O}$  300.1263, found 300.1263.

*X-ray Crystal Data for 8j :*

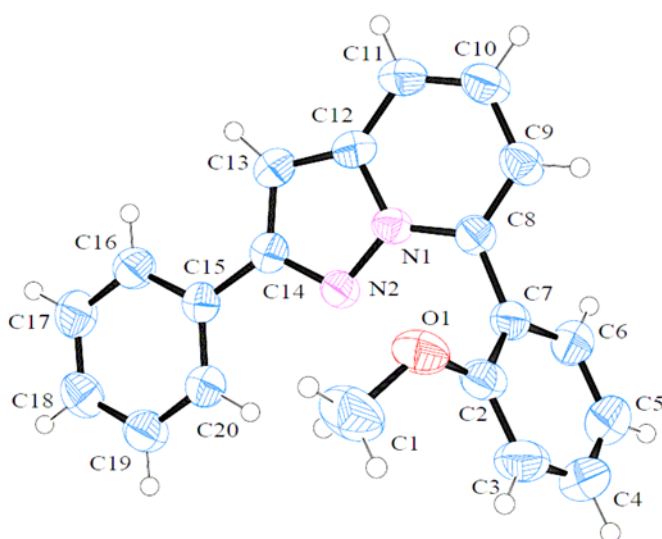

Empirical formula

$\text{C}_{20}\text{H}_{16}\text{N}_2\text{O}$



|                                   |                                                                                          |
|-----------------------------------|------------------------------------------------------------------------------------------|
| Formula weight                    | 300.35                                                                                   |
| Temperature                       | 296(2) K                                                                                 |
| Wavelength                        | 0.71073 Å                                                                                |
| Crystal system                    | Monoclinic                                                                               |
| Space group                       | C 2/c                                                                                    |
| Unit cell dimensions              | a = 23.0916(13) Å = 90°.<br>b = 7.3204(4) Å =<br>97.320(3)°.<br>c = 38.0041(18) Å = 90°. |
| Volume                            | 6371.8(6) Å <sup>3</sup>                                                                 |
| Z                                 | 16                                                                                       |
| Density (calculated)              | 1.252 Mg/m <sup>3</sup>                                                                  |
| Absorption coefficient            | 0.078 mm <sup>-1</sup>                                                                   |
| F(000)                            | 2528                                                                                     |
| Crystal size                      | 0.29 x 0.24 x 0.11 mm <sup>3</sup>                                                       |
| Theta range for data collection   | 1.78 to 25.02°.                                                                          |
| Index ranges                      | -27<=h<=24, -8<=k<=8, -43<=l<=45                                                         |
| Reflections collected             | 21286                                                                                    |
| Independent reflections           | 5605 [R(int) = 0.0350]                                                                   |
| Completeness to theta = 25.02°    | 99.5 %                                                                                   |
| Absorption correction             | multi-scan                                                                               |
| Max. and min. transmission        | 0.9914 and 0.9777                                                                        |
| Refinement method                 | Full-matrix least-squares on F <sup>2</sup>                                              |
| Data / restraints / parameters    | 5605 / 0 / 415                                                                           |
| Goodness-of-fit on F <sup>2</sup> | 1.041                                                                                    |
| Final R indices [I>2sigma(I)]     | R1 = 0.0454, wR2 = 0.1279                                                                |

R indices (all data)

R1 = 0.0688, wR2 = 0.1535

Largest diff. peak and hole

0.174 and -0.303 e.Å<sup>-3</sup>

Crystallographic data for the structure have been deposited with the Cambridge Crystallographic Data Centre as supplementary publication number CCDC **XXXXXX**.

Copies of the data can be obtained, free of charge, on application to CCDC, 12 Union Road, Cambridge CB2 1EZ, UK [e-mail: data\_request@ccdc.cam.ac.uk, or fax: +44-1223-336033].

### **7-(3-methoxyphenyl)-2-phenylpyrazolo[1,5-a]pyridine(8k)**

yellow solid; m.p.: 180-182°C;  $R_f$  = 0.48 ( *n*-hexane/ethyl acetate = 10/1 as eluent );

<sup>1</sup>H NMR (CDCl<sub>3</sub>, 500 MHz) : δ 8.00 (d,  $J$  = 7.5 Hz, 2H), 7.72 (s, 1H), 7.60 (d,  $J$  = 8 Hz, 1H), 7.53 (dd,  $J$  = 8 Hz, 1H), 7.46 (m, 3H), 7.36 (t,  $J$  = 7.5 Hz, 1H), 7.18 (dd,  $J$  = 8.5, 7 Hz, 1H), 7.07 (dd,  $J$  = 8, 2.5 Hz, 1H), 6.90 (s, 1H), 6.87 (dd,  $J$  = 6.5, 1 Hz, 1H) 3.91 (s, 3H); <sup>13</sup>C NMR (CDCl<sub>3</sub>, 125MHz) : δ 159.2, 152.7, 142.7, 140.0, 134.8, 133.4, 129.2, 128.5 (2C), 128.2, 126.5 (2C), 123.4, 121.7, 116.8, 115.3, 114.6, 112.4, 93.8, 55.3 ppm; HRMS (EI) calcd. for C<sub>20</sub>H<sub>16</sub>N<sub>2</sub>O 300.1263, found 300.1261.

### **7-(4-methoxyphenyl)-2-phenylpyrazolo[1,5-a]pyridine (8l)**

brown liquid;  $R_f$  = 0.51 ( *n*-hexane/ethyl acetate = 10/1 as eluent ); <sup>1</sup>H NMR (CDCl<sub>3</sub>, 400 MHz) : δ 8.05 (dt,  $J$  = 8.8, 2.0 Hz, 2H), 7.98-7.35 (m, 4H), 7.15 (dd,  $J$  = 8.8, 6.8 Hz, 2H), 6.88 (s, 1H), 6.80 (dd,  $J$  = 6.8, 1.2 Hz, 1H), 3.90 (s, 3H) ; <sup>13</sup>C NMR (CDCl<sub>3</sub>, 100MHz) : δ 160.3, 152.6, 142.8, 104.1, 133.4, 130.7 (2C), 128.5 (2C), 128.3, 128.1, 126.5 (2C), 123.6, 116.1, 113.5 (2C), 111.7, 93.7, 55.3 ppm; HRMS (EI) calcd. for C<sub>20</sub>H<sub>16</sub>N<sub>2</sub>O 300.1263, found 300.1262.

### **7-(4-nitrophenyl)-2-phenylpyrazolo[1,5-a]pyridine (8m)**

orange solid; m.p.: 155-158°C;  $R_f = 0.32$  ( *n*-hexane/ethyl acetate = 10/1 as eluent );  $^1\text{H}$  NMR ( $\text{CDCl}_3$ , 500 MHz ) :  $\delta$  8.41 (d,  $J = 9$  Hz, 2H), 8.28 (d,  $J = 9$  Hz, 2H), 7.96 (d,  $J = 7$  Hz, 2H), 7.62 (dd,  $J = 9, 1.5$  Hz, 1H), 7.45 (t,  $J = 7.5$  Hz, 2H), 7.38 (t,  $J = 7.5$  Hz, 1H), 7.23 (dd,  $J = 8.5, 7$  Hz, 1H), 6.94 (s, 1H), 6.93 (dd,  $J = 7$  Hz, 1, 1H) ;  $^{13}\text{C}$  NMR ( $\text{CDCl}_3$ , 125MHz) :  $\delta$  153.2, 148.0, 142.7, 139.8, 137.8, 132.9, 130.2 (2C), 128.7 (2C), 128.5, 126.5 (2C), 123.4 (2C), 123.3, 118.4, 113.4, 94.5 ; HRMS (EI) calcd. for  $\text{C}_{19}\text{H}_{13}\text{N}_3\text{O}_2$  315.1008, found 315.1010.

### **7-hexyl-2-(4-methoxyphenyl)pyrazolo[1,5-a]pyridine (8n)**

brown liquid;  $R_f = 0.56$  ( *n*-hexane/ethyl acetate = 10/1 as eluent );  $^1\text{H}$  NMR ( $\text{CDCl}_3$ , 500 MHz ) :  $\delta$  7.97 (d,  $J = 9$  Hz, 2H), 7.39 (d,  $J = 8.5$  Hz, 1H), 7.05 (dd,  $J = 8.5, 7$  Hz, 1H), 7.00 (d,  $J = 9$  Hz, 2H), 6.73 (s, 1H), 6.56 (d,  $J = 7$  Hz, 1H), 3.86 (s, 3H), 3.22 (t,  $J = 7.5$  Hz, 2H), 1.94 (q,  $J = 7.5$  Hz, 2H), 1.53 (q,  $J = 7$  Hz, 2H), 1.43 (m, 4H), 0.94 (t,  $J = 7$  Hz, 3H);  $^{13}\text{C}$  NMR ( $\text{CDCl}_3$ , 125MHz) :  $\delta$  159.6, 152.4, 142.1, 142.0, 127.7 (2C), 126.5, 123.1, 115.0, 114.0 (2C), 109.2, 92.9, 55.2, 31.6, 30.9, 29.1, 26.1, 22.5, 14.0; HRMS (EI) calcd. for  $\text{C}_{20}\text{H}_{24}\text{N}_2\text{O}$  308.1889, found 308.1889.

### **2-(4-methoxyphenyl)-7-phenylpyrazolo[1,5-a]pyridine (8o)**

brown solid; m.p.: 158-160°C;  $R_f = 0.52$  ( *n*-hexane/ethyl acetate = 10/1 as eluent );  $^1\text{H}$  NMR ( $\text{CDCl}_3$ , 500 MHz ) :  $\delta$  8.07 (d,  $J = 7$  Hz, 2H), 7.92 (d,  $J = 8.5$  Hz, 1H), 7.56-7.48 (m, 4H), 7.16 (dd,  $J = 9, 7$  Hz, 1H), 6.97 (d,  $J = 9$  Hz, 2H), 6.82 (s, 1H), 6.56 (dd,  $J = 7, 1$  Hz, 1H);  $^{13}\text{C}$  NMR ( $\text{CDCl}_3$ , 125MHz) :  $\delta$  159.7, 152.6, 142.7, 140.2, 133.7, 129.3 (2C), 129.2 (2C), 128.1 (2C), 127.7 (2C), 126.2, 123.4, 116.5, 113.9, 112.1, 93.2, 55.2 ppm; HRMS (EI) calcd. for  $\text{C}_{20}\text{H}_{16}\text{N}_2\text{O}$  300.1263, found 300.1265.

### **2,7-bis(4-methoxyphenyl)pyrazolo[1,5-a]pyridine (8p)**

green solid; m.p.: 170-172°C;  $R_f = 0.54$  (*n*-hexane/ethyl acetate = 10/1 as eluent);  $^1\text{H}$  NMR ( $\text{CDCl}_3$ , 500 MHz):  $\delta$  8.05 (d,  $J = 9$  Hz, 2H), 7.92 (d,  $J = 9$  Hz, 2H), 7.47 (dd,  $J = 9, 1.5$  Hz, 1H), 7.15 (dd,  $J = 9, 7$  Hz, 1H), 7.07 (d,  $J = 8.5$  Hz, 2H), 6.97 (d,  $J = 8.5$  Hz, 2H), 6.80 (s, 1H), 6.78 (dd,  $J = 7, 1.5$  Hz, 1H), 3.91 (s, 1H), 3.85 (s, 1H);  $^{13}\text{C}$  NMR ( $\text{CDCl}_3$ , 125MHz):  $\delta$  160.3, 159.7, 152.5, 142.8, 140.0, 130.7 (2C), 127.7 (2C), 126.2, 126.1, 123.5, 115.9, 113.9(2C), 113.5(2C), 111.4, 93.1, 55.3, 55.2ppm; HRMS (EI) calcd. for  $\text{C}_{21}\text{H}_{18}\text{N}_2\text{O}_2$  330.1368, found 330.1368.

#### **4-(2-(4-methoxyphenyl)pyrazolo[1,5-a]pyridin-7-yl)benzotrile (8q)**

yellow solid; m.p.: 154-156°C;  $R_f = 0.42$  *n*-hexane/ethyl acetate = 10/1 as eluent);  $^1\text{H}$  NMR ( $\text{CDCl}_3$ , 500 MHz):  $\delta$  8.20 (d,  $J = 8.5$  Hz, 2H), 7.88 (d,  $J = 8.5$  Hz, 2H), 7.82 (d,  $J = 8.5$  Hz, 2H), 7.56 (dd,  $J = 9, 1$  Hz, 1H), 7.19 (dd,  $J = 8.5, 7$  Hz, 1H), 6.97 (d,  $J = 8.5$  Hz, 2H), 6.85-6.83 (2H), 3.59 (s, 3H);  $^{13}\text{C}$  NMR ( $\text{CDCl}_3$ , 125MHz):  $\delta$  159.9, 153.0, 142.7, 138.0, 131.9(2C), 129.8 (2C), 127.7 (2C), 125.7, 123.2, 118.6, 117.9, 114.0 (2C), 112.9, 112.6, 93.7, 55.3; HRMS (EI) calcd. for  $\text{C}_{21}\text{H}_{15}\text{N}_3\text{O}$  325.1215, found 325.1212.

#### **7-hexyl-2-(4-(trifluoromethyl)phenyl)pyrazolo[1,5-a]pyridine (8r)**

brown liquid;  $R_f = 0.51$  *n*-hexane/ethyl acetate = 10/1 as eluent);  $^1\text{H}$  NMR ( $\text{CDCl}_3$ , 500 MHz):  $\delta$  8.13 (d,  $J = 8$  Hz, 2H), 7.71 (d,  $J = 8$  Hz, 2H), 7.44 (d,  $J = 9$  Hz, 1H), 7.10 (dd,  $J = 9, 7$  Hz, 1H), 6.86 (s, 1H), 6.63 (d,  $J = 6.5$  Hz, 1H), 3.22 (t,  $J = 8$  Hz, 2H), 1.90 (quintet,  $J = 7.5$  Hz, 2H), 1.50 (quintet,  $J = 7$  Hz, 2H), 1.38, (m, 4H), 0.93 (t,  $J = 7$  Hz, 3H);  $^{13}\text{C}$  NMR ( $\text{CDCl}_3$ , 125MHz):  $\delta$  150.9, 142.3, 142.1, 137.2, 129.9 (quartet,  $J_{\text{C-F}} = 64.5$  Hz, 2C), 124.3 (quartet,  $J_{\text{C-F}} = 270.1$  Hz), 126.6 (2C), 125.5 (quartet,  $J_{\text{C-F}} = 4.1$  Hz), 123.6, 115.5, 110.1, 94.1, 31.5, 30.9, 29.1, 26.1, 22.5, 14.0 ppm; HRMS (EI) calcd. for  $\text{C}_{20}\text{H}_{21}\text{F}_3\text{N}_2$  346.1657, found 346.1658.

*X-ray Crystal Data for 9a :*

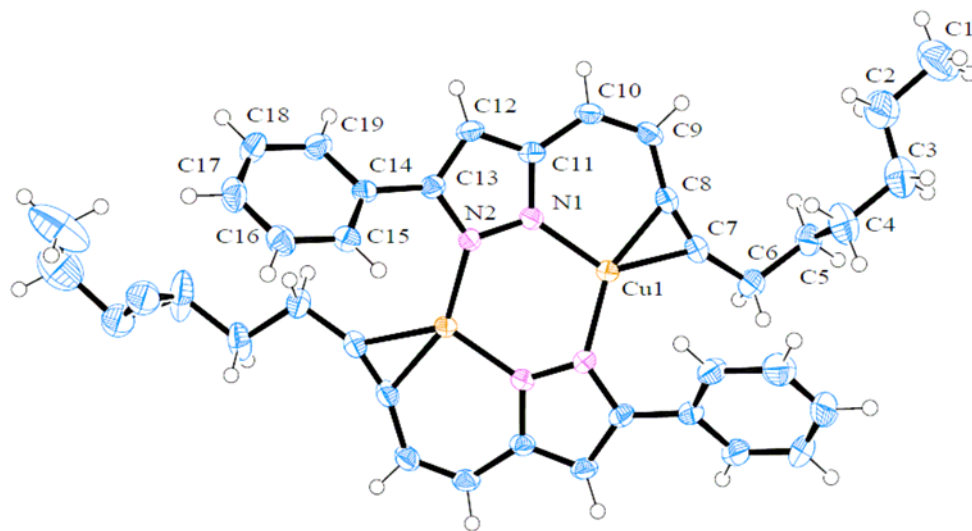

|                      |                              |                |
|----------------------|------------------------------|----------------|
| Empirical formula    | $C_{38}H_{42}Cu_2N_4$        |                |
| Formula weight       | 681.84                       |                |
| Temperature          | 200(2) K                     |                |
| Wavelength           | 0.71073 Å                    |                |
| Crystal system       | Monoclinic                   |                |
| Space group          | P 21/a                       |                |
| Unit cell dimensions | $a = 14.2593(3)$ Å           | $= 90^\circ$ . |
|                      | $b = 12.1166(3)$ Å           | $=$            |
|                      | $c = 19.4748(5)$ Å           | $= 90^\circ$ . |
| Volume               | $3294.38(14)$ Å <sup>3</sup> |                |
| Z                    | 4                            |                |
| Density (calculated) | $1.375$ Mg/m <sup>3</sup>    |                |

|                                   |                                             |
|-----------------------------------|---------------------------------------------|
| Absorption coefficient            | 1.324 mm <sup>-1</sup>                      |
| F(000)                            | 1424                                        |
| Crystal size                      | 0.6 x 0.5 x 0.25 mm <sup>3</sup>            |
| Theta range for data collection   | 2.14 to 25.35°.                             |
| Index ranges                      | -17<=h<=17, -13<=k<=14, -18<=l<=23          |
| Reflections collected             | 19908                                       |
| Independent reflections           | 5936 [R(int) = 0.0637]                      |
| Completeness to theta = 25.35°    | 98.3 %                                      |
| Absorption correction             | Semi-empirical from equivalents             |
| Max. and min. transmission        | 0.635 and 0.4947                            |
| Refinement method                 | Full-matrix least-squares on F <sup>2</sup> |
| Data / restraints / parameters    | 5936 / 0 / 397                              |
| Goodness-of-fit on F <sup>2</sup> | 1.037                                       |
| Final R indices [I>2sigma(I)]     | R1 = 0.0432, wR2 = 0.1097                   |
| R indices (all data)              | R1 = 0.0580, wR2 = 0.1192                   |
| Largest diff. peak and hole       | 0.733 and -0.582 e.Å <sup>-3</sup>          |

Crystallographic data for the structure have been deposited with the Cambridge Crystallographic Data Centre as supplementary publication number CCDC **XXXXXX**. Copies of the data can be obtained, free of charge, on application to CCDC, 12 Union Road, Cambridge CB2 1EZ, UK [e-mail: [data\\_request@ccdc.cam.ac.uk](mailto:data_request@ccdc.cam.ac.uk), or fax: +44-1223-336033].

*X-ray Crystal Data for 9e :*

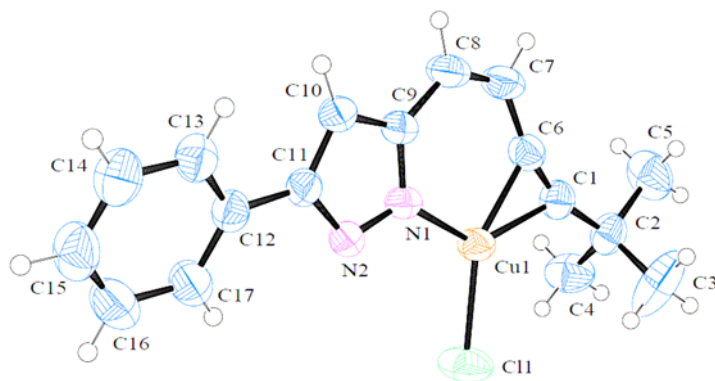

|                                 |                                                      |               |
|---------------------------------|------------------------------------------------------|---------------|
| Empirical formula               | C <sub>17</sub> H <sub>19</sub> ClCuN <sub>2</sub> O |               |
| Formula weight                  | 366.33                                               |               |
| Temperature                     | 293(2) K                                             |               |
| Wavelength                      | 0.71073 Å                                            |               |
| Crystal system                  | Triclinic                                            |               |
| Space group                     | P -1                                                 |               |
| Unit cell dimensions            | a = 9.3101(2) Å                                      | = 69.3330(10) |
|                                 | b = 9.2508(3) Å                                      | = 84.4530(10) |
|                                 | c = 11.2420(4) Å                                     | = 76.7640(10) |
| Volume                          | 881.72(5) Å <sup>3</sup>                             |               |
| Z                               | 2                                                    |               |
| Density (calculated)            | 1.380 Mg/m <sup>3</sup>                              |               |
| Absorption coefficient          | 1.392 mm <sup>-1</sup>                               |               |
| F(000)                          | 378                                                  |               |
| Crystal size                    | 0.6 x 0.42 x 0.15 mm <sup>3</sup>                    |               |
| Theta range for data collection | 2.25 to 25.05                                        |               |
| Index ranges                    | -11 ≤ h ≤ 11, -10 ≤ k ≤ 11, -13 ≤ l ≤ 13             |               |
| Reflections collected           | 6959                                                 |               |
| Independent reflections         | 3083 [R(int) = 0.0495]                               |               |
| Completeness to theta = 25.05?  | 99.1 %                                               |               |

|                                      |                                    |
|--------------------------------------|------------------------------------|
| Absorption correction                | Semi-empirical from equivalents    |
| Max. and min. transmission           | 0.7228 and 0.5248                  |
| Refinement method                    | Full-matrix least-squares on $F^2$ |
| Data / restraints / parameters       | 3083 / 0 / 196                     |
| Goodness-of-fit on $F^2$             | 1.038                              |
| Final R indices [ $I > 2\sigma(I)$ ] | R1 = 0.0799, wR2 = 0.1958          |
| R indices (all data)                 | R1 = 0.0866, wR2 = 0.2017          |
| Largest diff. peak and hole          | 2.787 and -3.062 e.Å <sup>-3</sup> |

Crystallographic data for the structure have been deposited with the Cambridge Crystallographic Data Centre as supplementary publication number CCDC **XXXXXX**. Copies of the data can be obtained, free of charge, on application to CCDC, 12 Union Road, Cambridge CB2 1EZ, UK [e-mail: [data\\_request@ccdc.cam.ac.uk](mailto:data_request@ccdc.cam.ac.uk), or fax: +44-1223-336033].



## Reference

- [1]. C. Y. Lee, C. F. Lin, J. L. Lee, C. C. Chiu, W. D. Lu, M. J. Wu, *J. Org. Chem.* **2004**, *69*, 2106-2110.
- [2]. O. Loreau, A. Maret, J. M. Chardigny, J. L. Sebedio, J. P. Noel, *Chemistry and physics of lipids* **2001** *110*, 57-67.
- [3]. C. Kosinski, A. Hirsch, FW Heine- mann, F. Hampel, *Eur. J. Org. Chem.* **2001**, *20*, 3879-3890.
- [4]. A. Tikad, A. Hamze, O. Provot, J. D. Brion, M. Alami, *Eur. J. Org. Chem.* **2010**, *4*, 725-731.
- [5]. O. Provot, A. Giraud, J. F. Peyrat, M. Alami, J. D. Brion, *Tetrahedron Lett.* **2005**, *46*, 8547-8550.

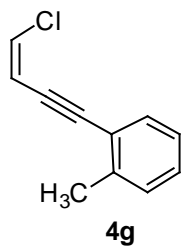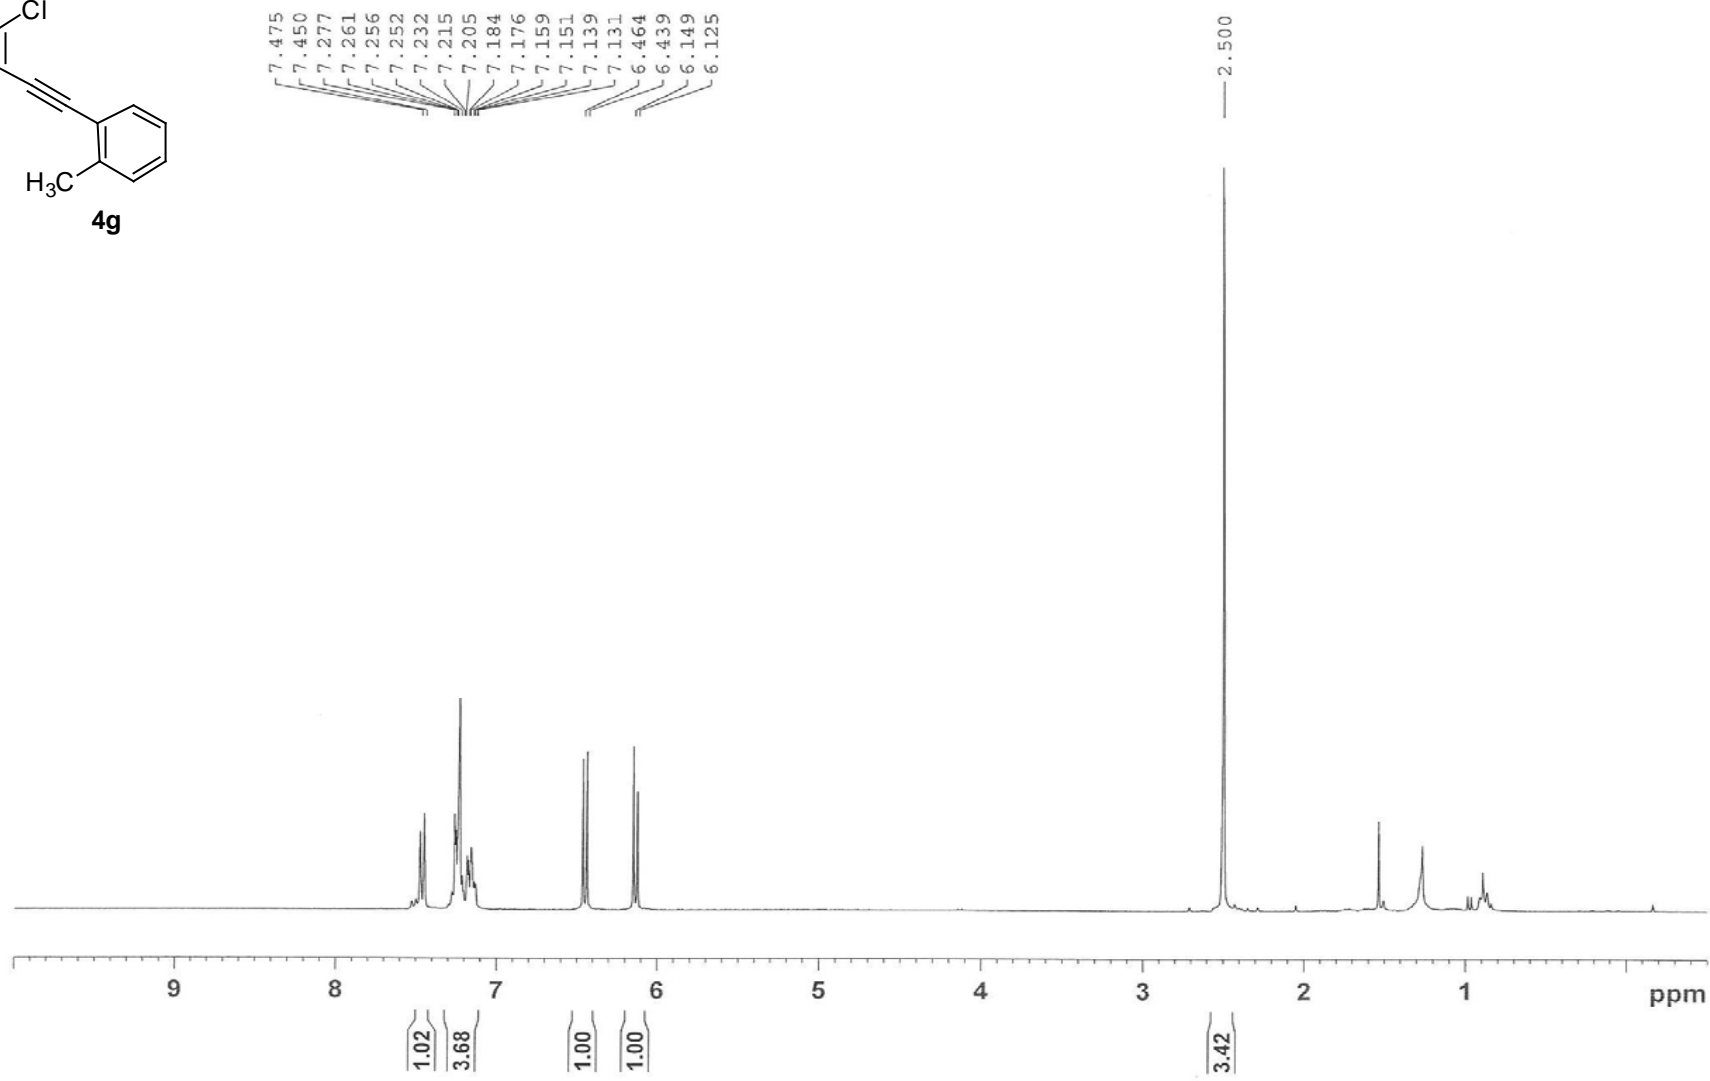

HO-15

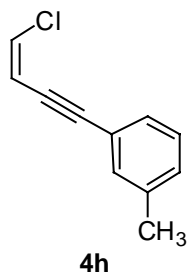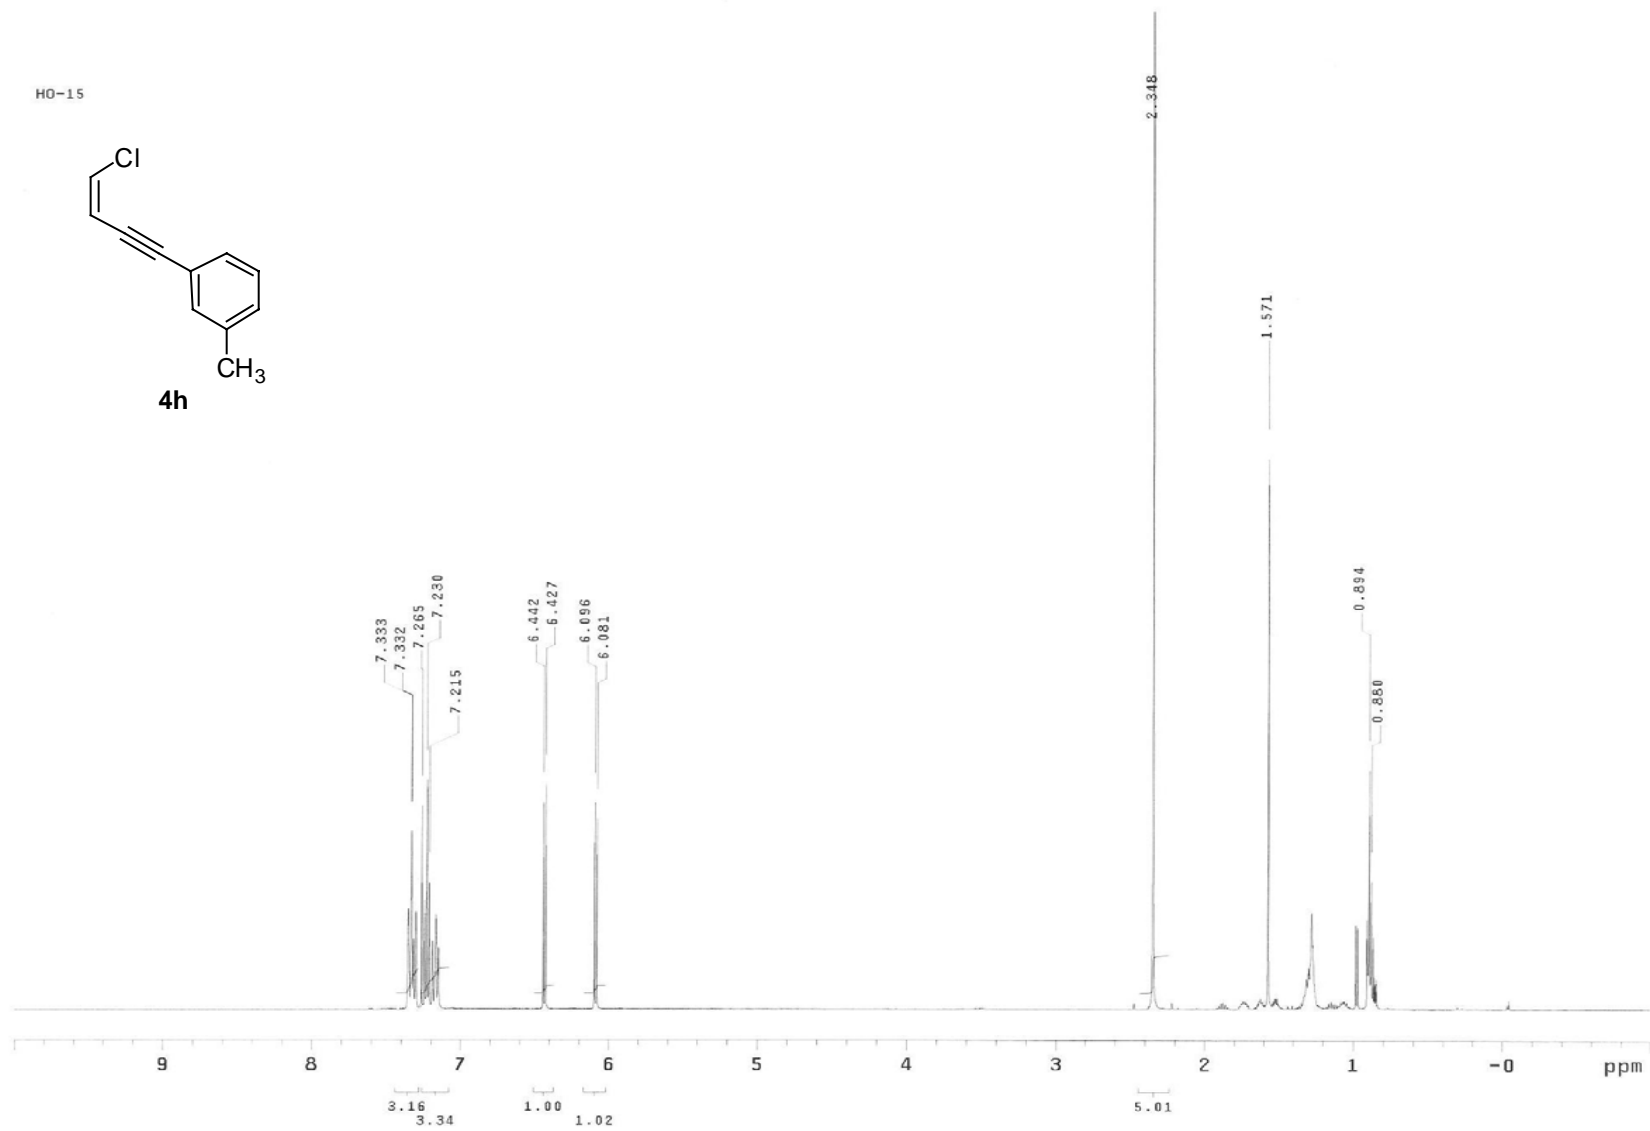

HO-15

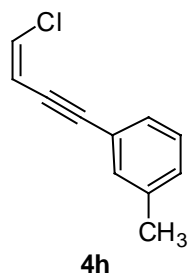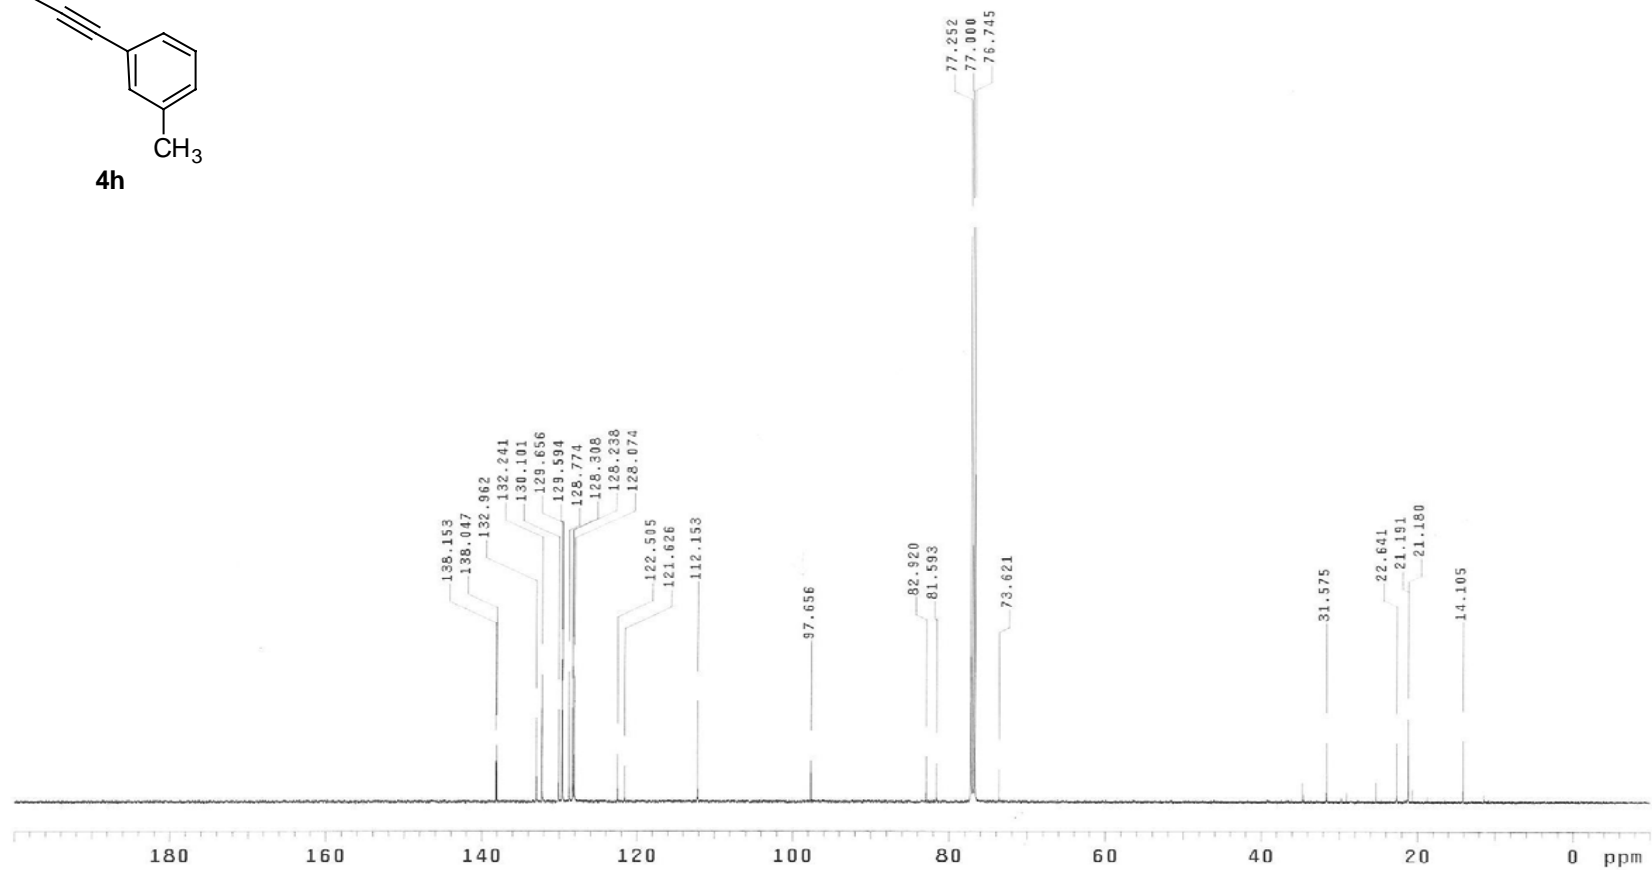

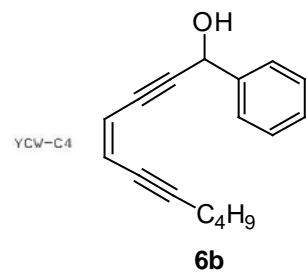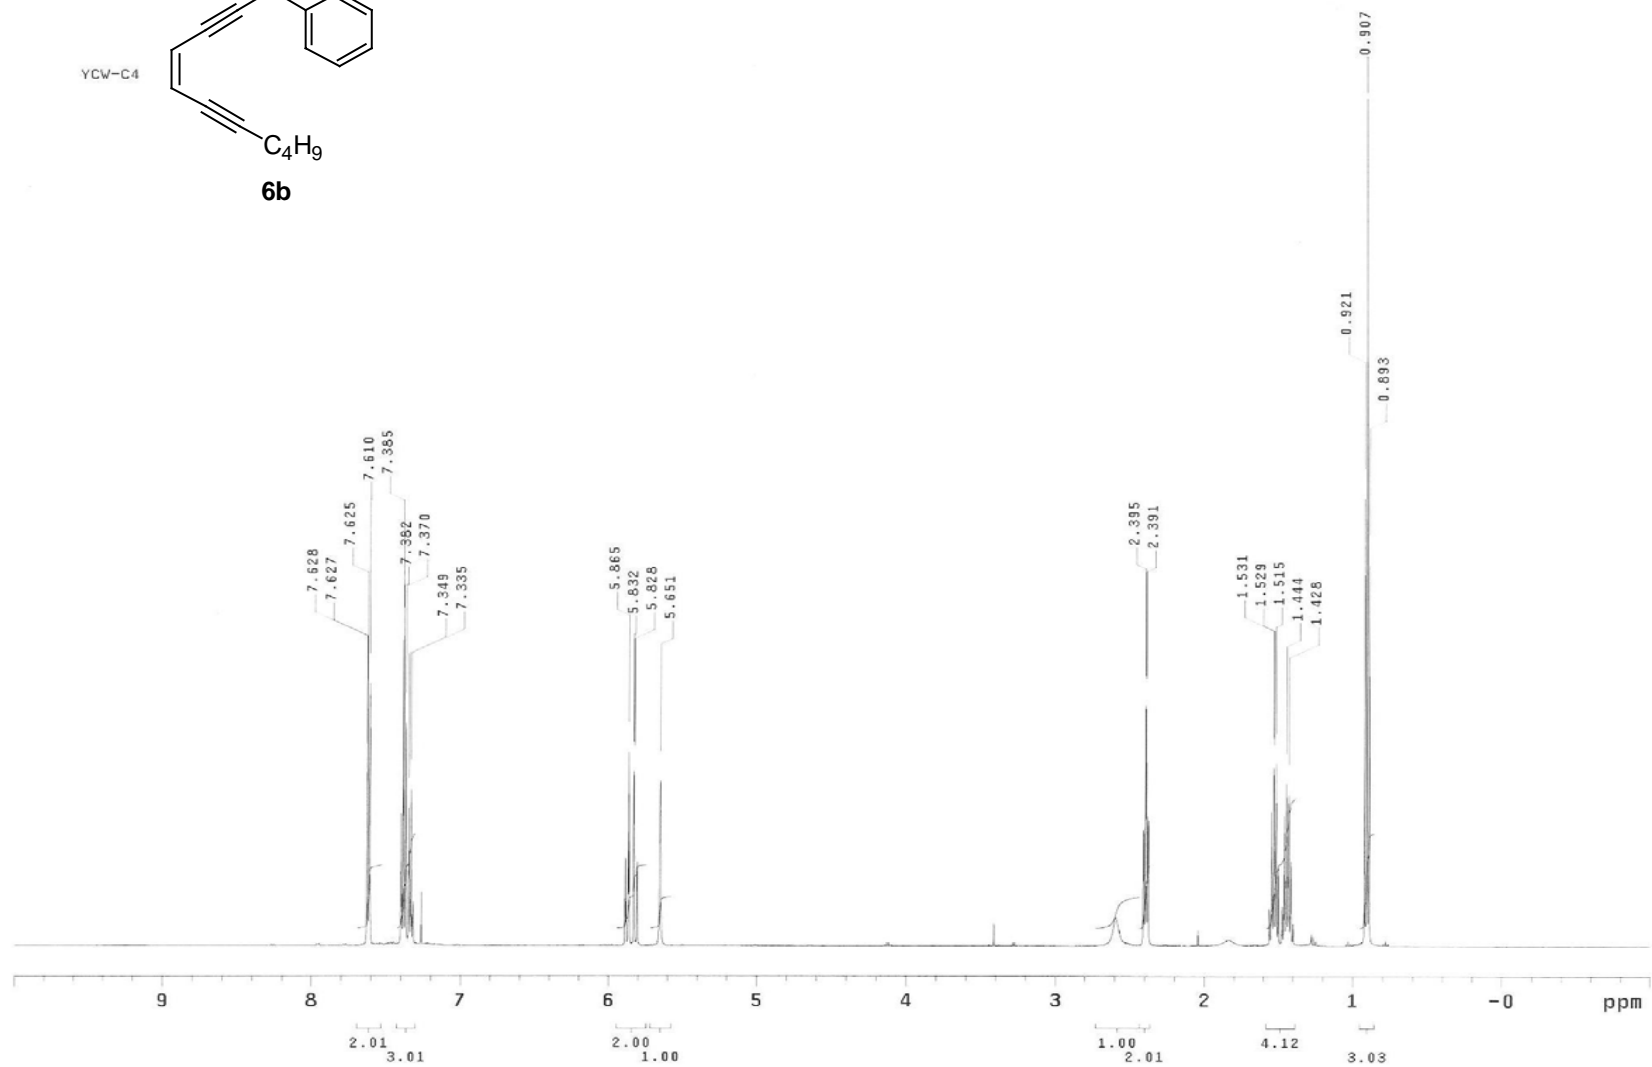

YCW-C4

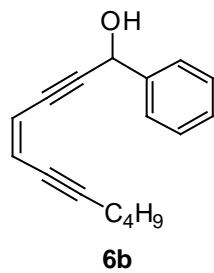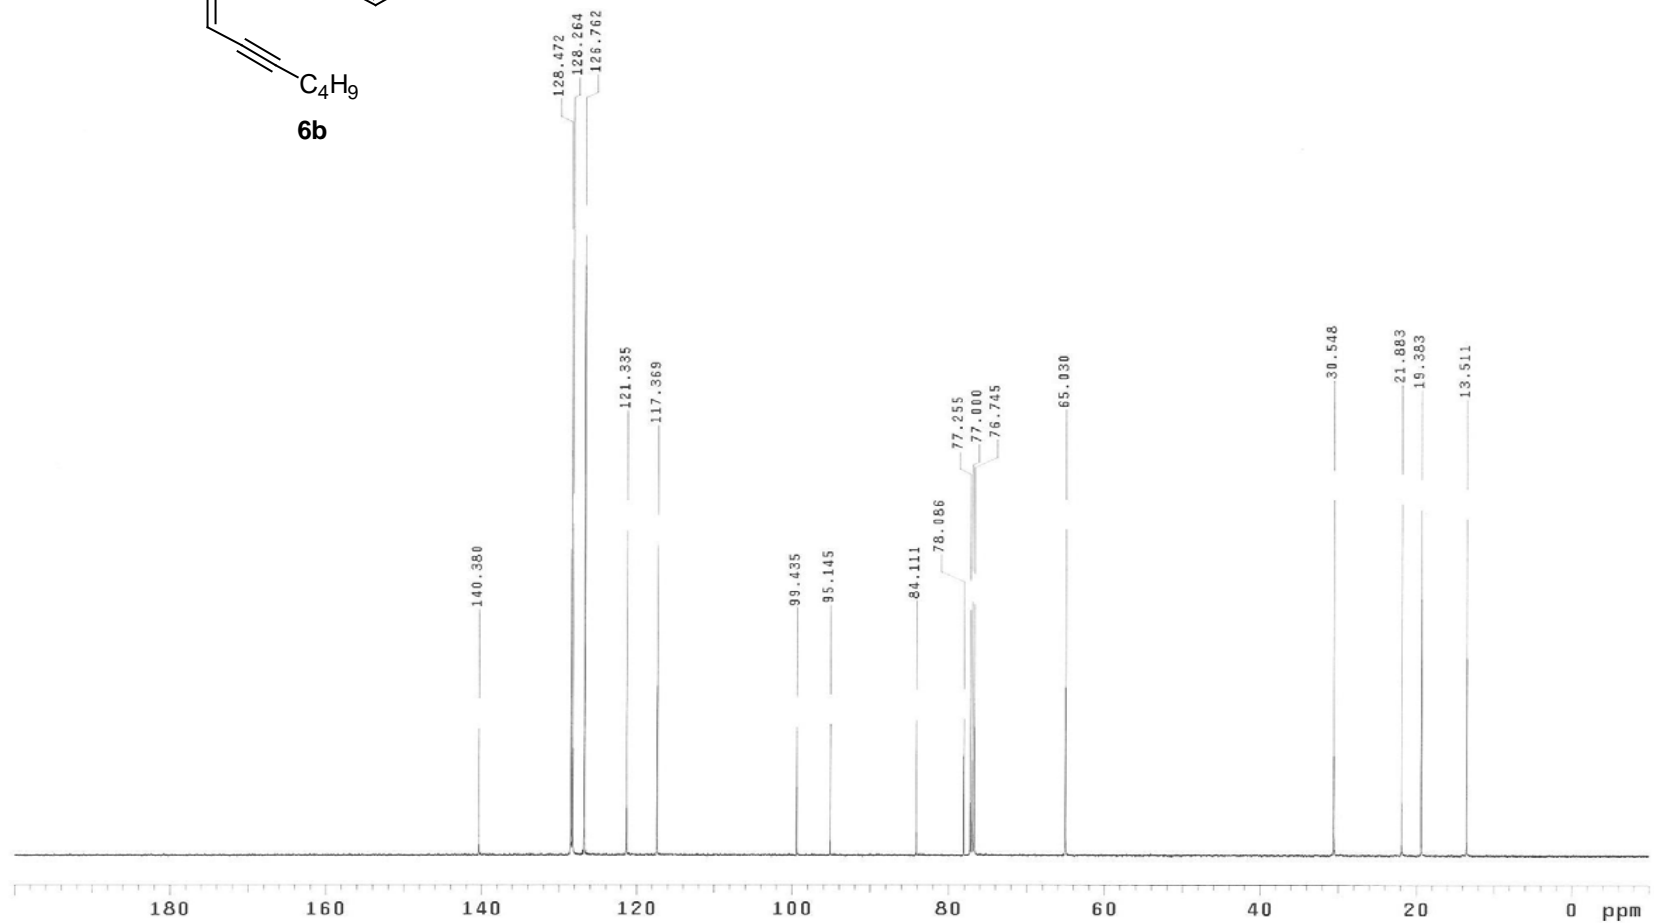

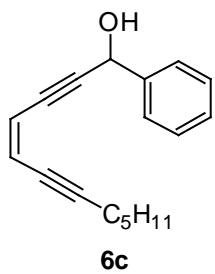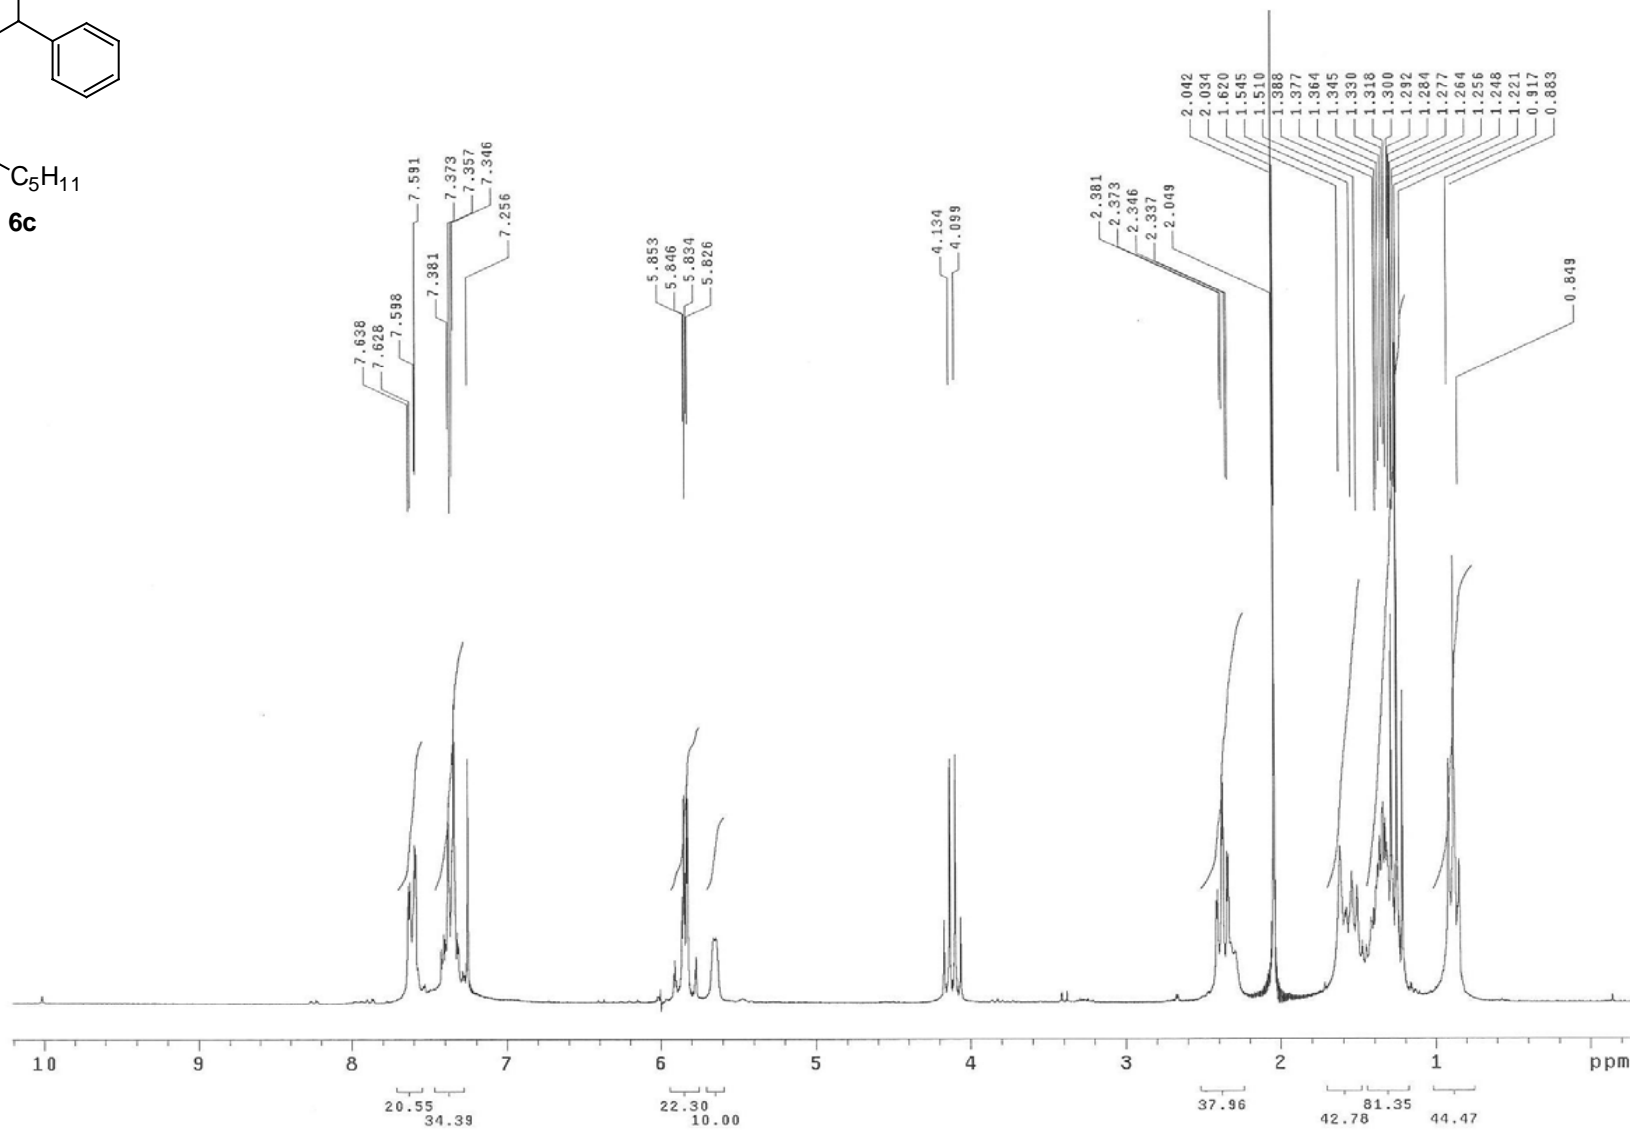

YCW-C6

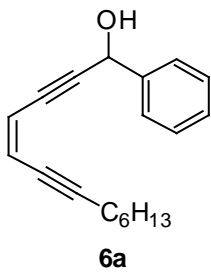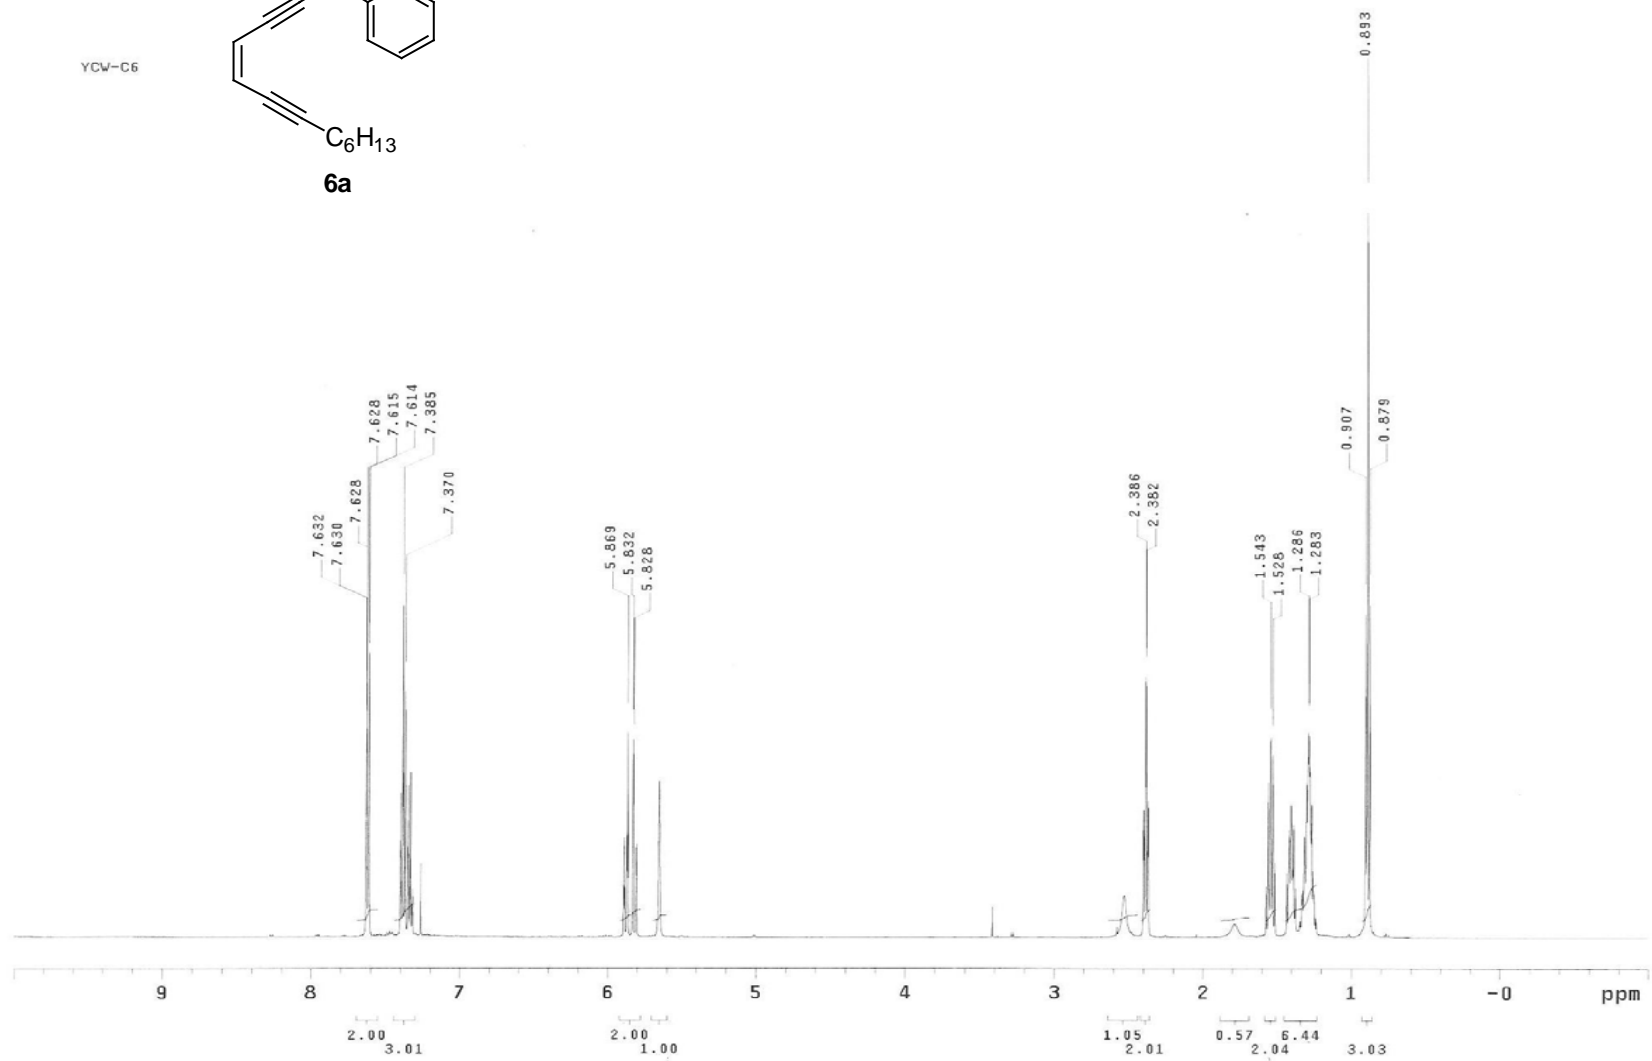



YCW-C6

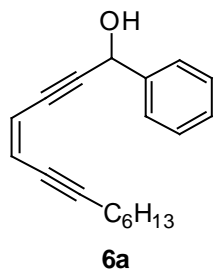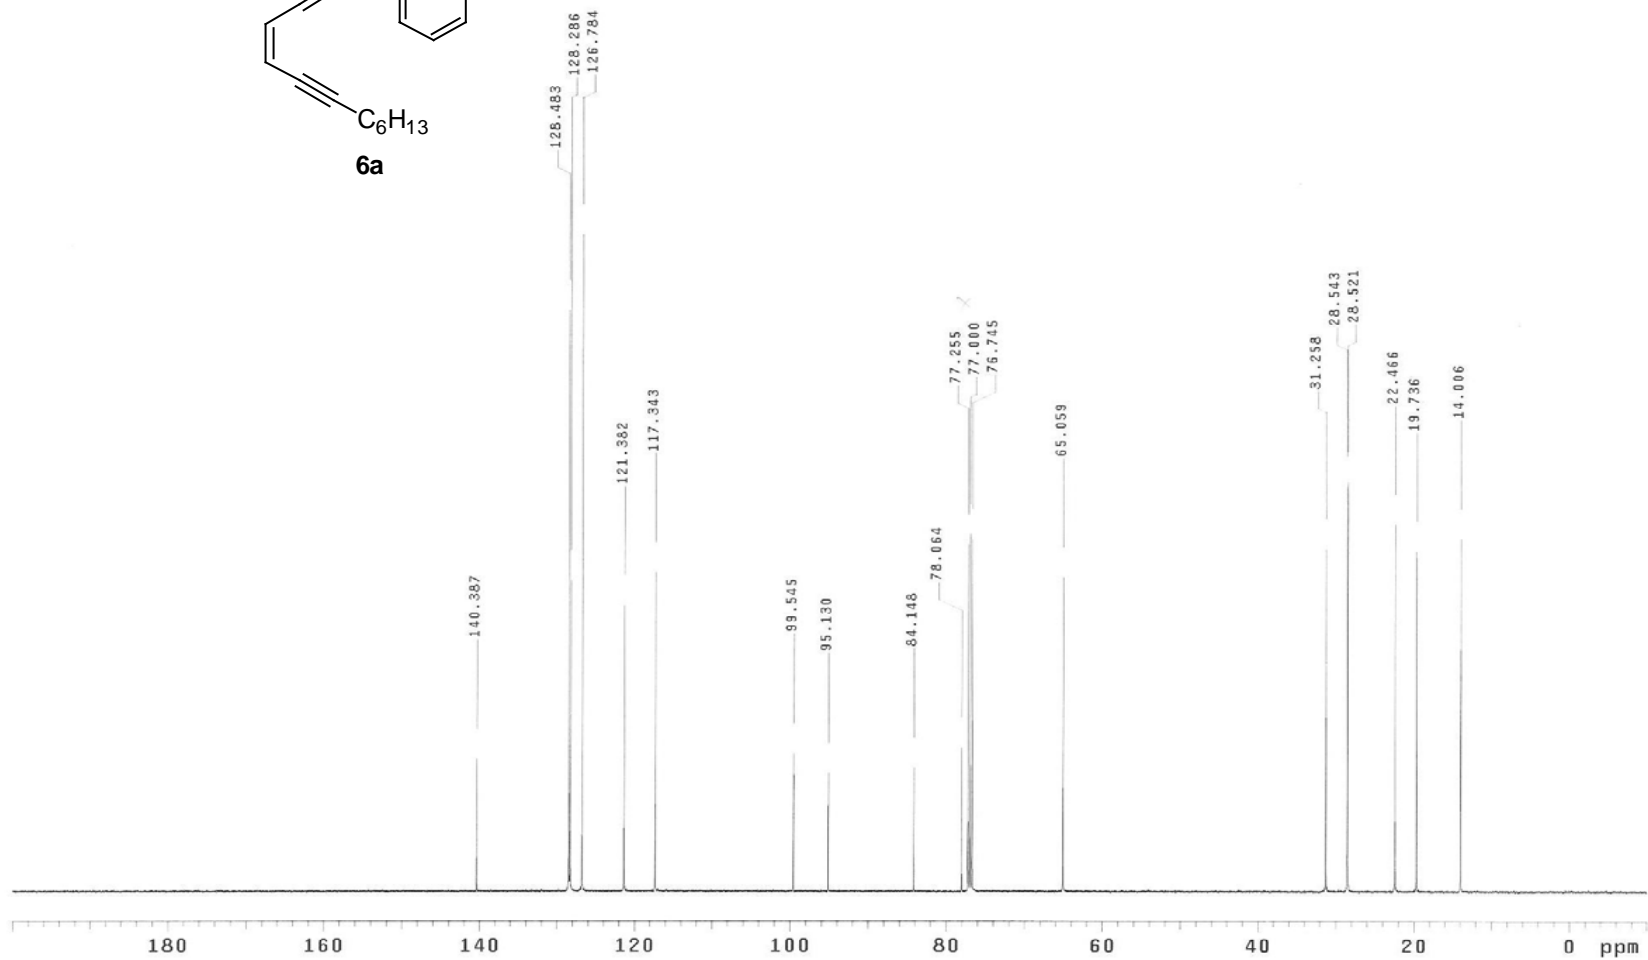

WHJ-124-T2

Pulse Sequence: s2pu1  
Solvent: CDCl3  
Ambient temperature  
GEMINI-200 "gemini200"

Pulse 42.0 degrees  
Acq. time 1.994 sec  
Width 3000.3 Hz  
72 repetitions  
OBSERVE H1, 199.9750736 MHz  
DATA PROCESSING  
FT size 16384  
Total time 2 hr, 51 sec

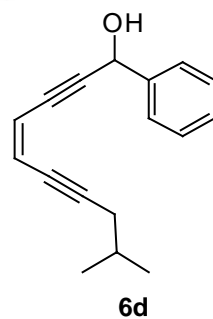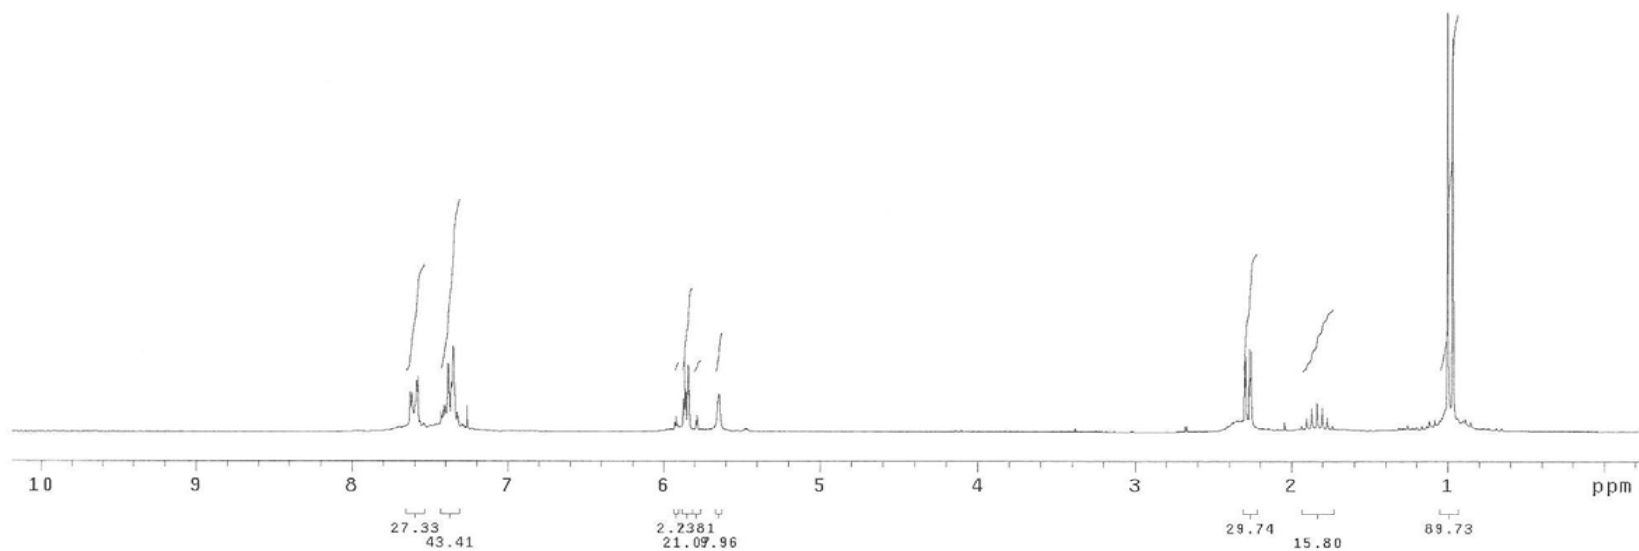

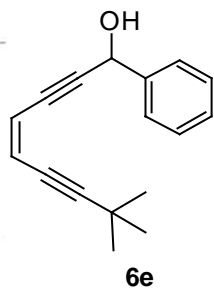

WHC-074

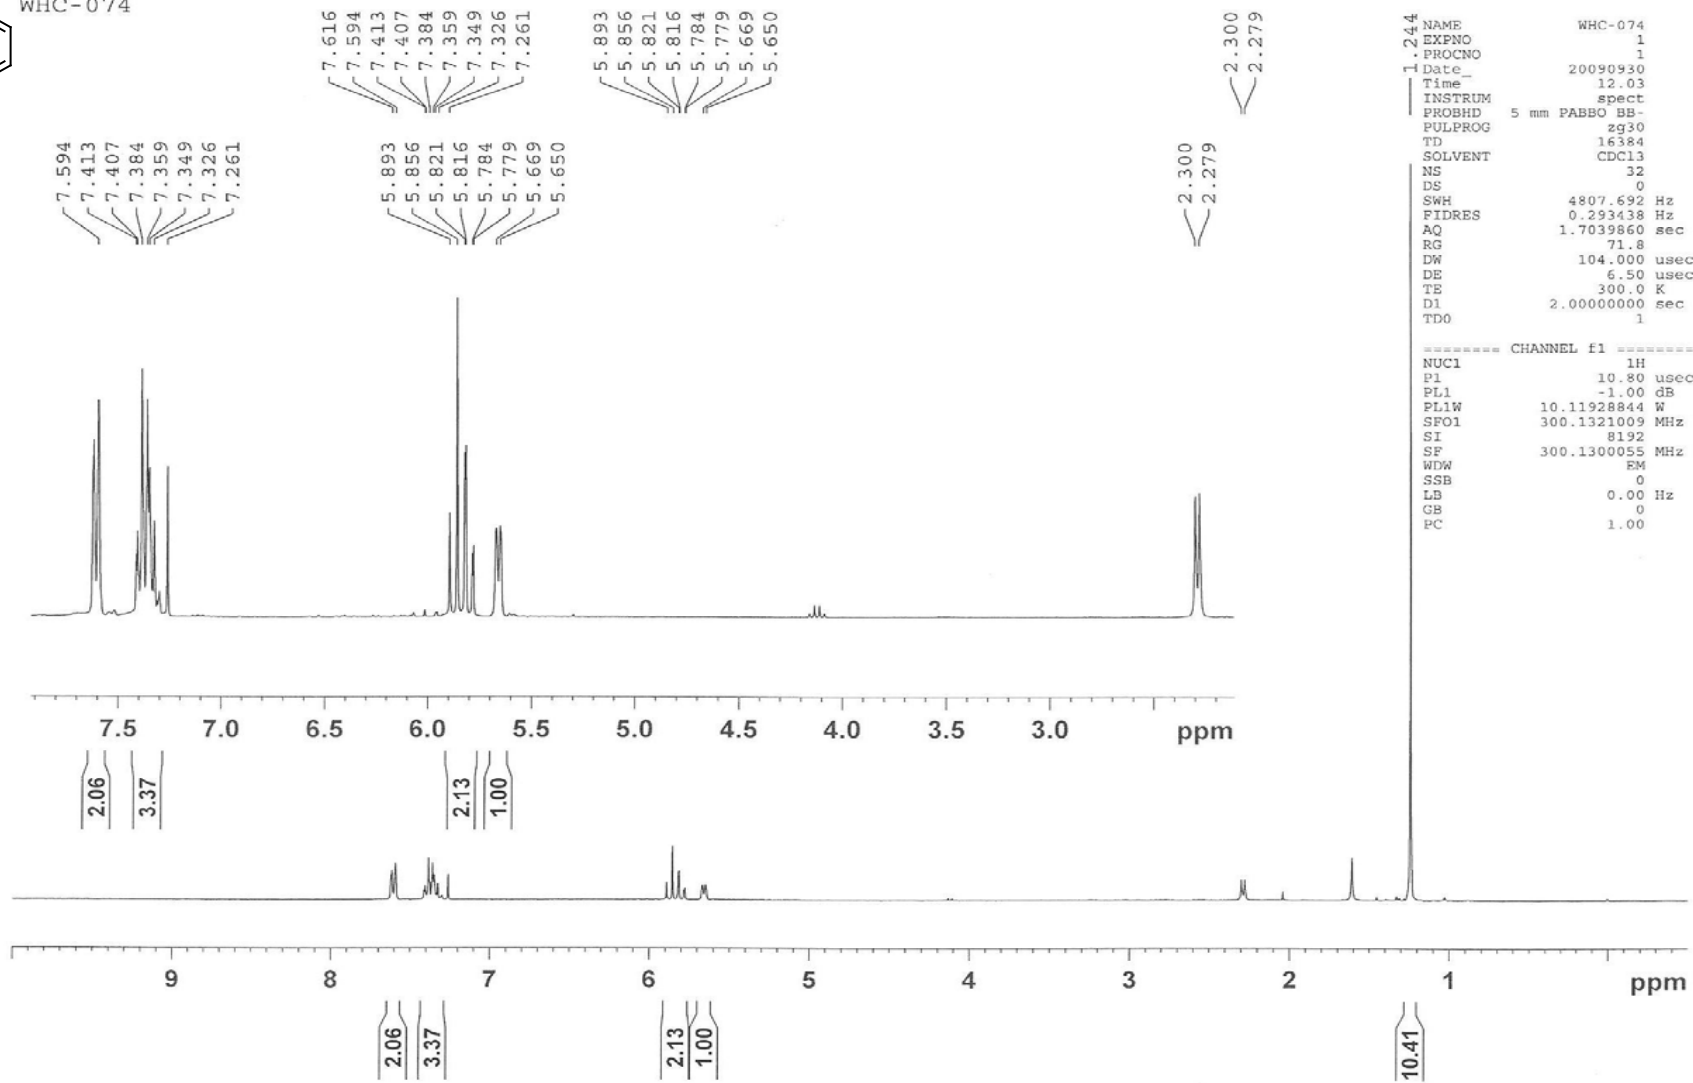

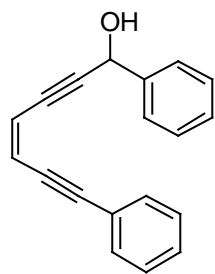

6g

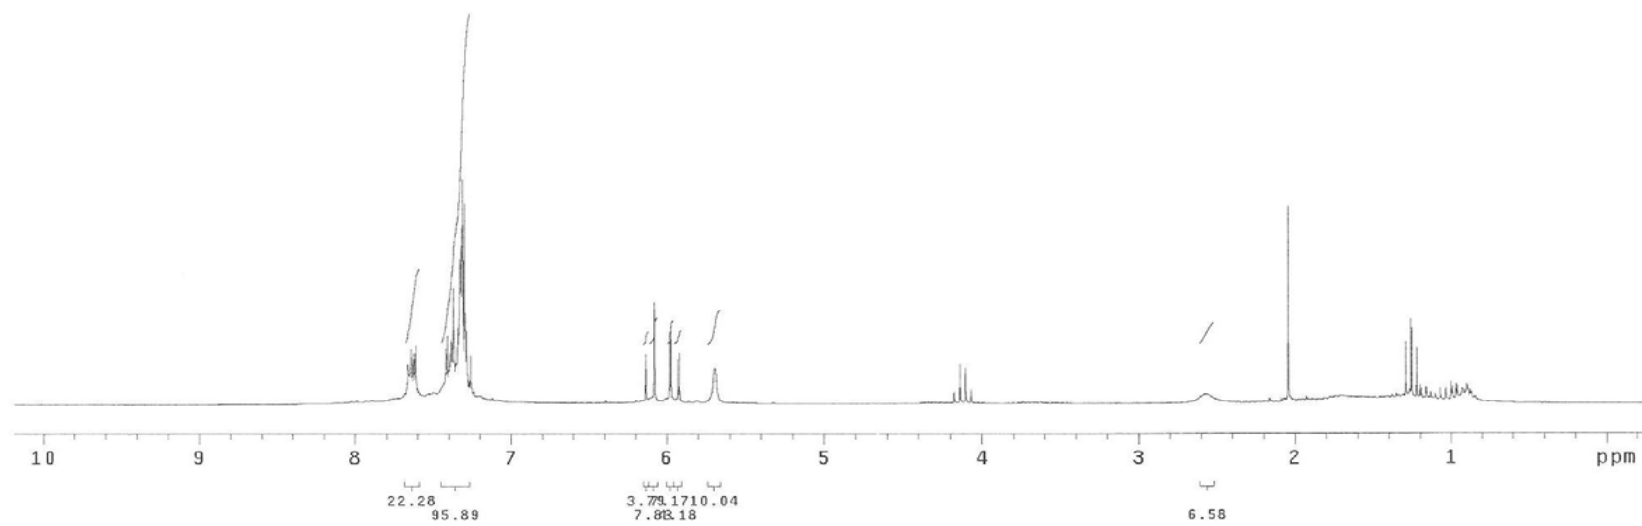

WHJ-210

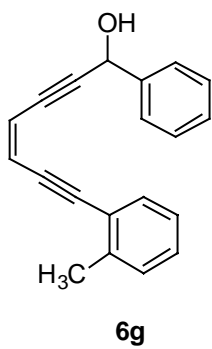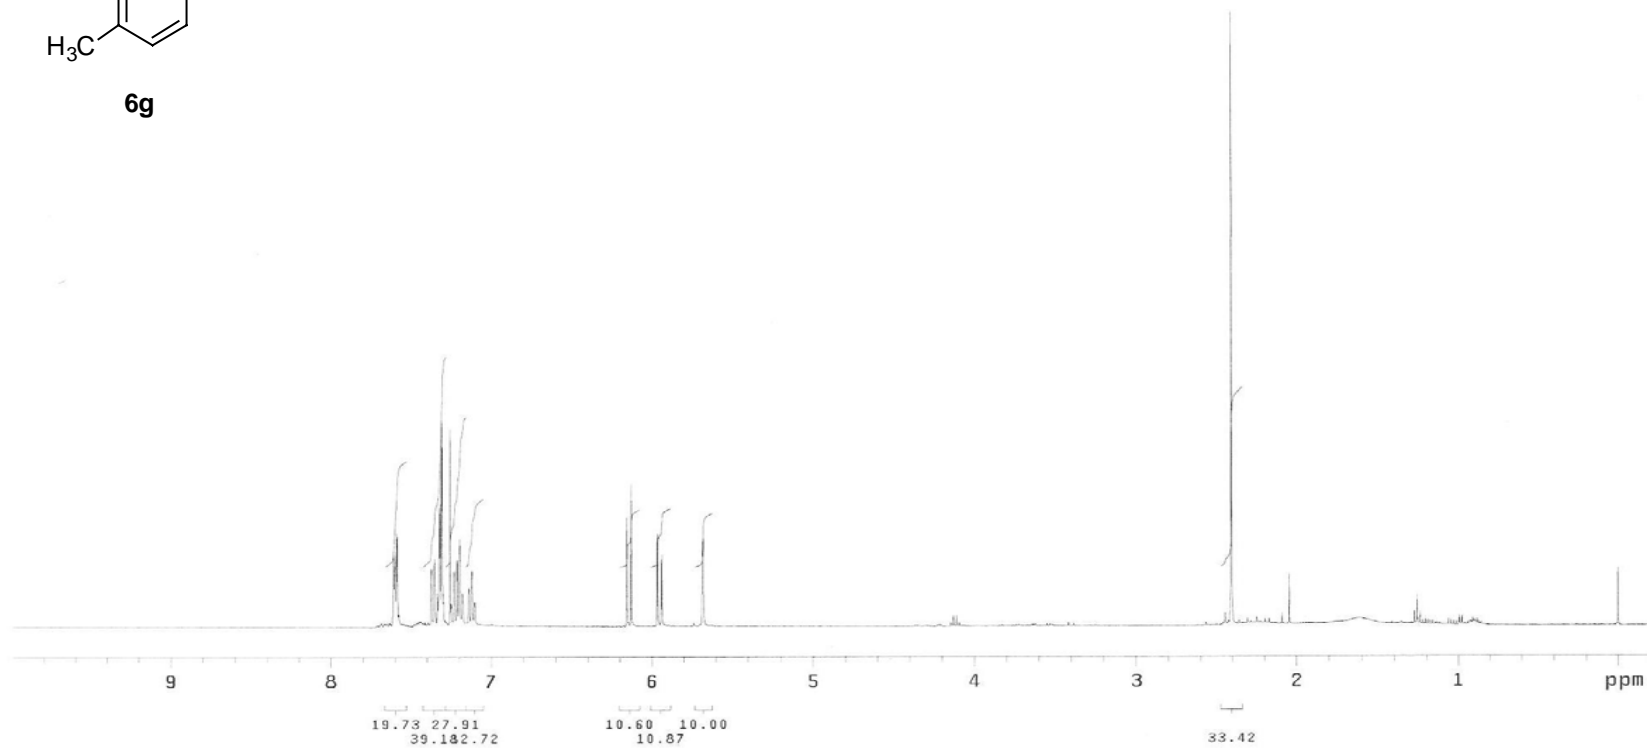

VHJ-210

Mercury-400BB "Mercuryplus400"  
Date: Mar 5 2008  
Solvent: CDCl3  
Ambient temperature  
Total 1392 repetitions

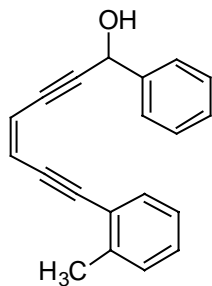

6g

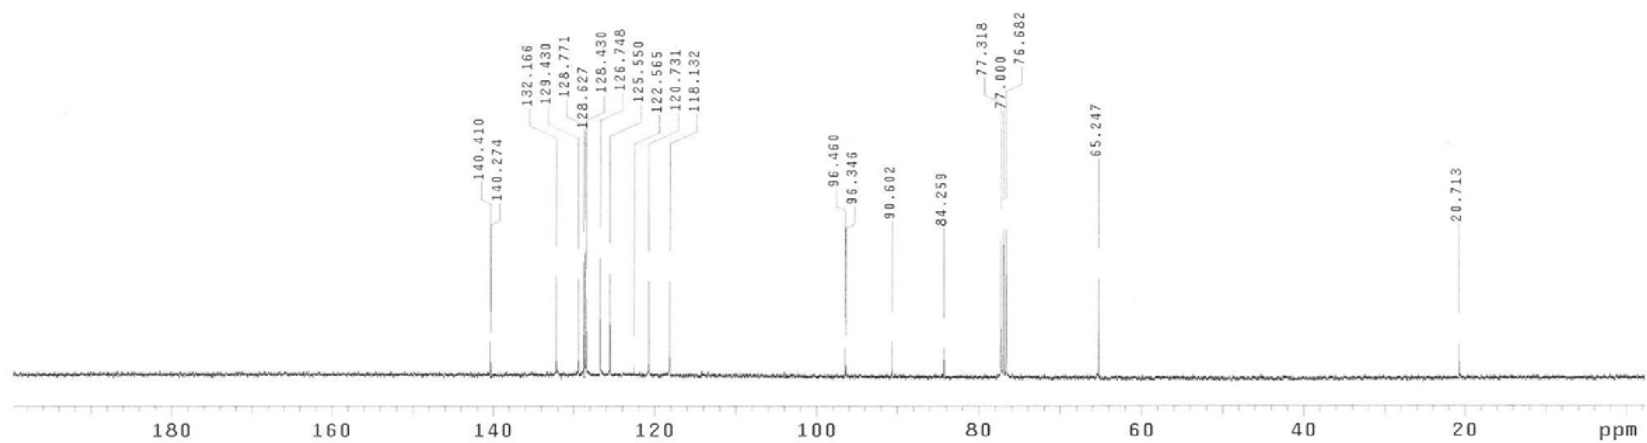

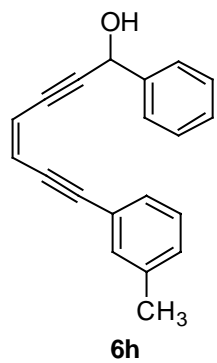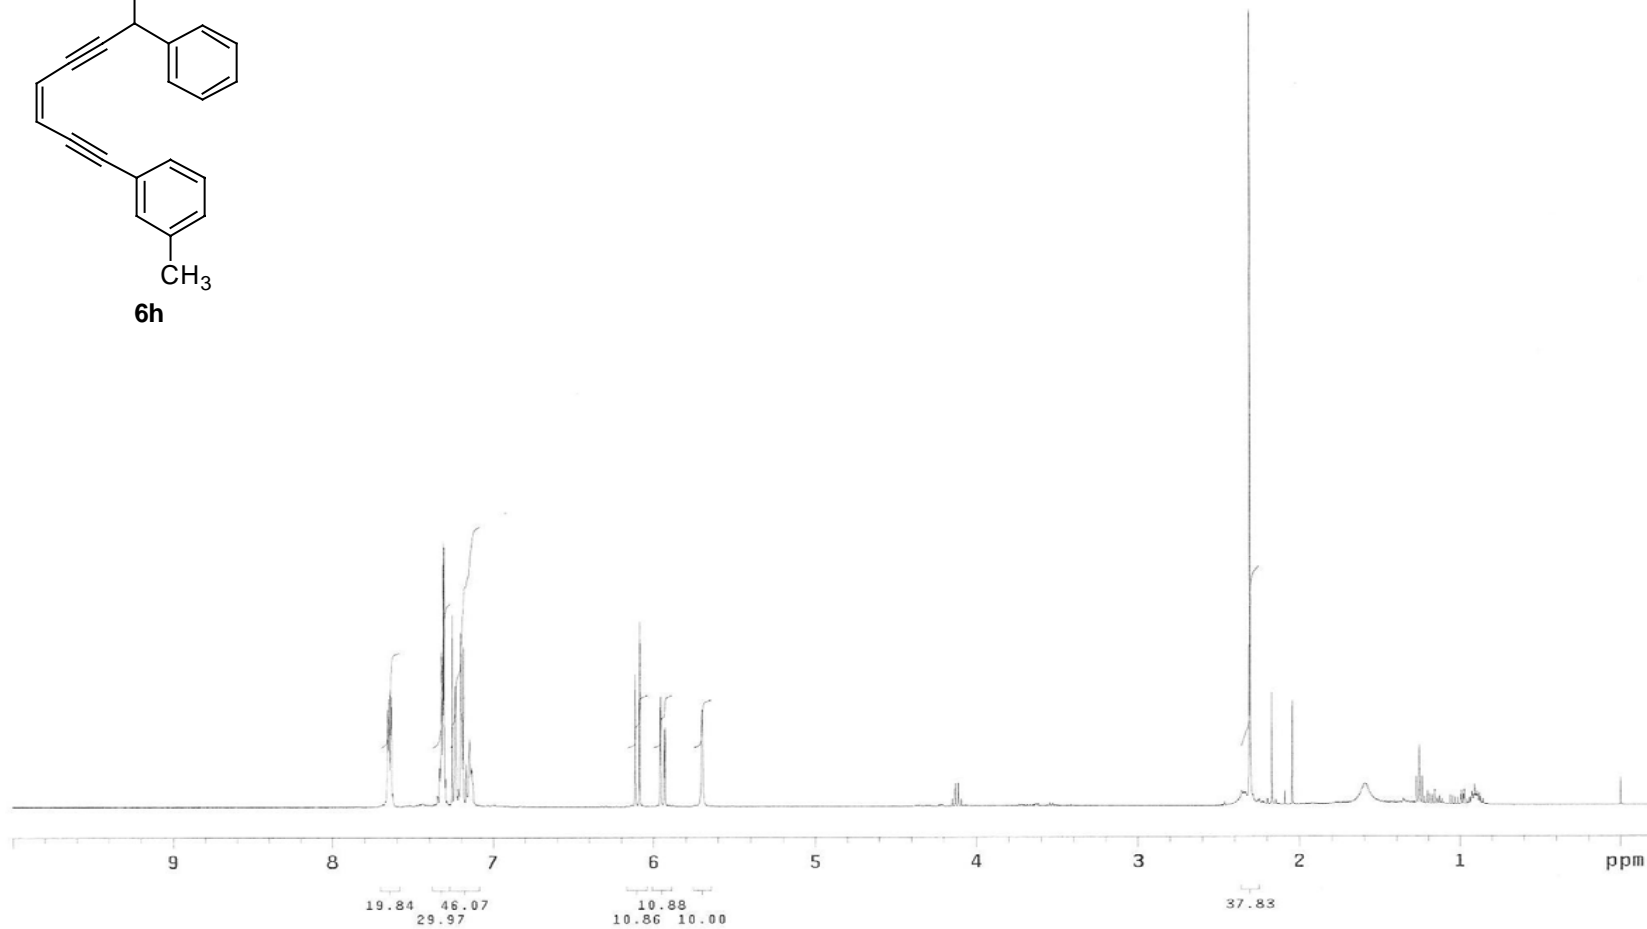

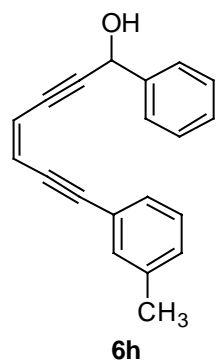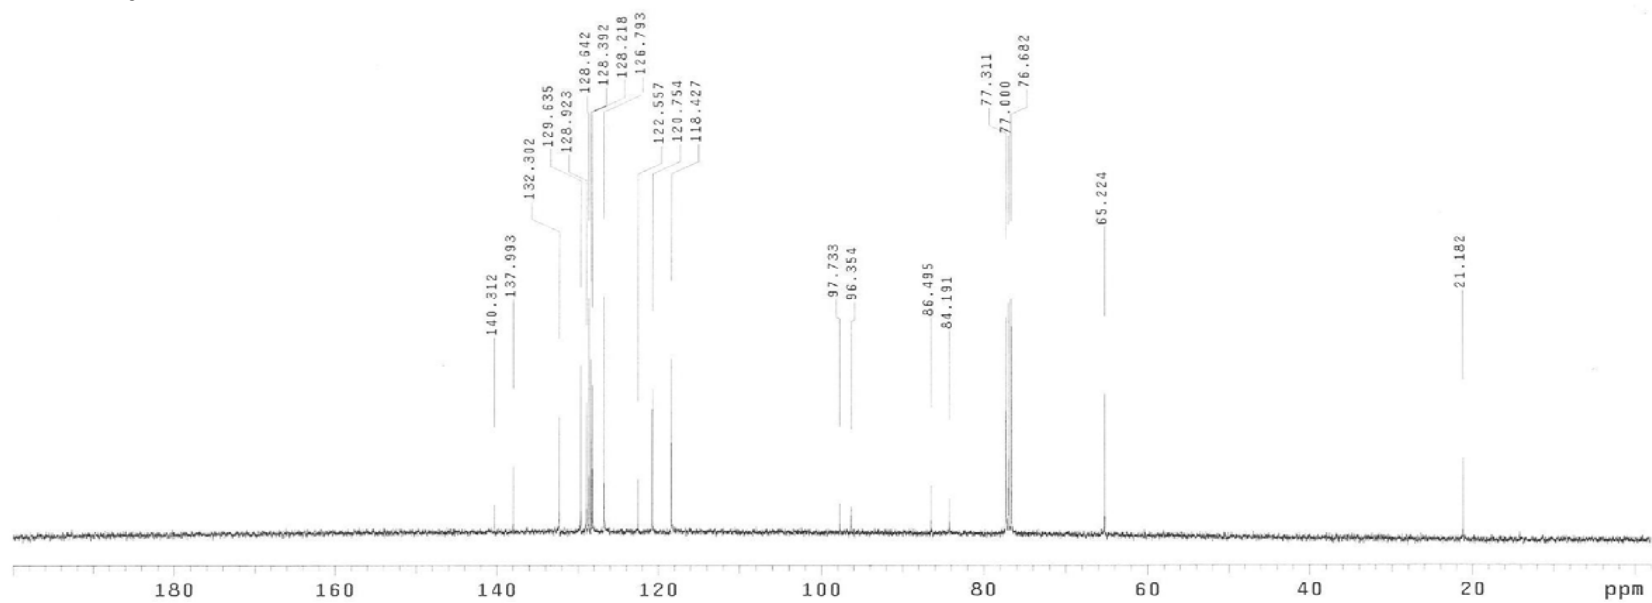



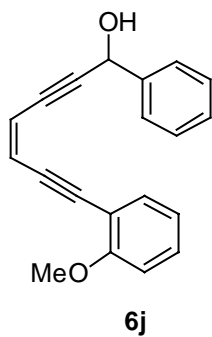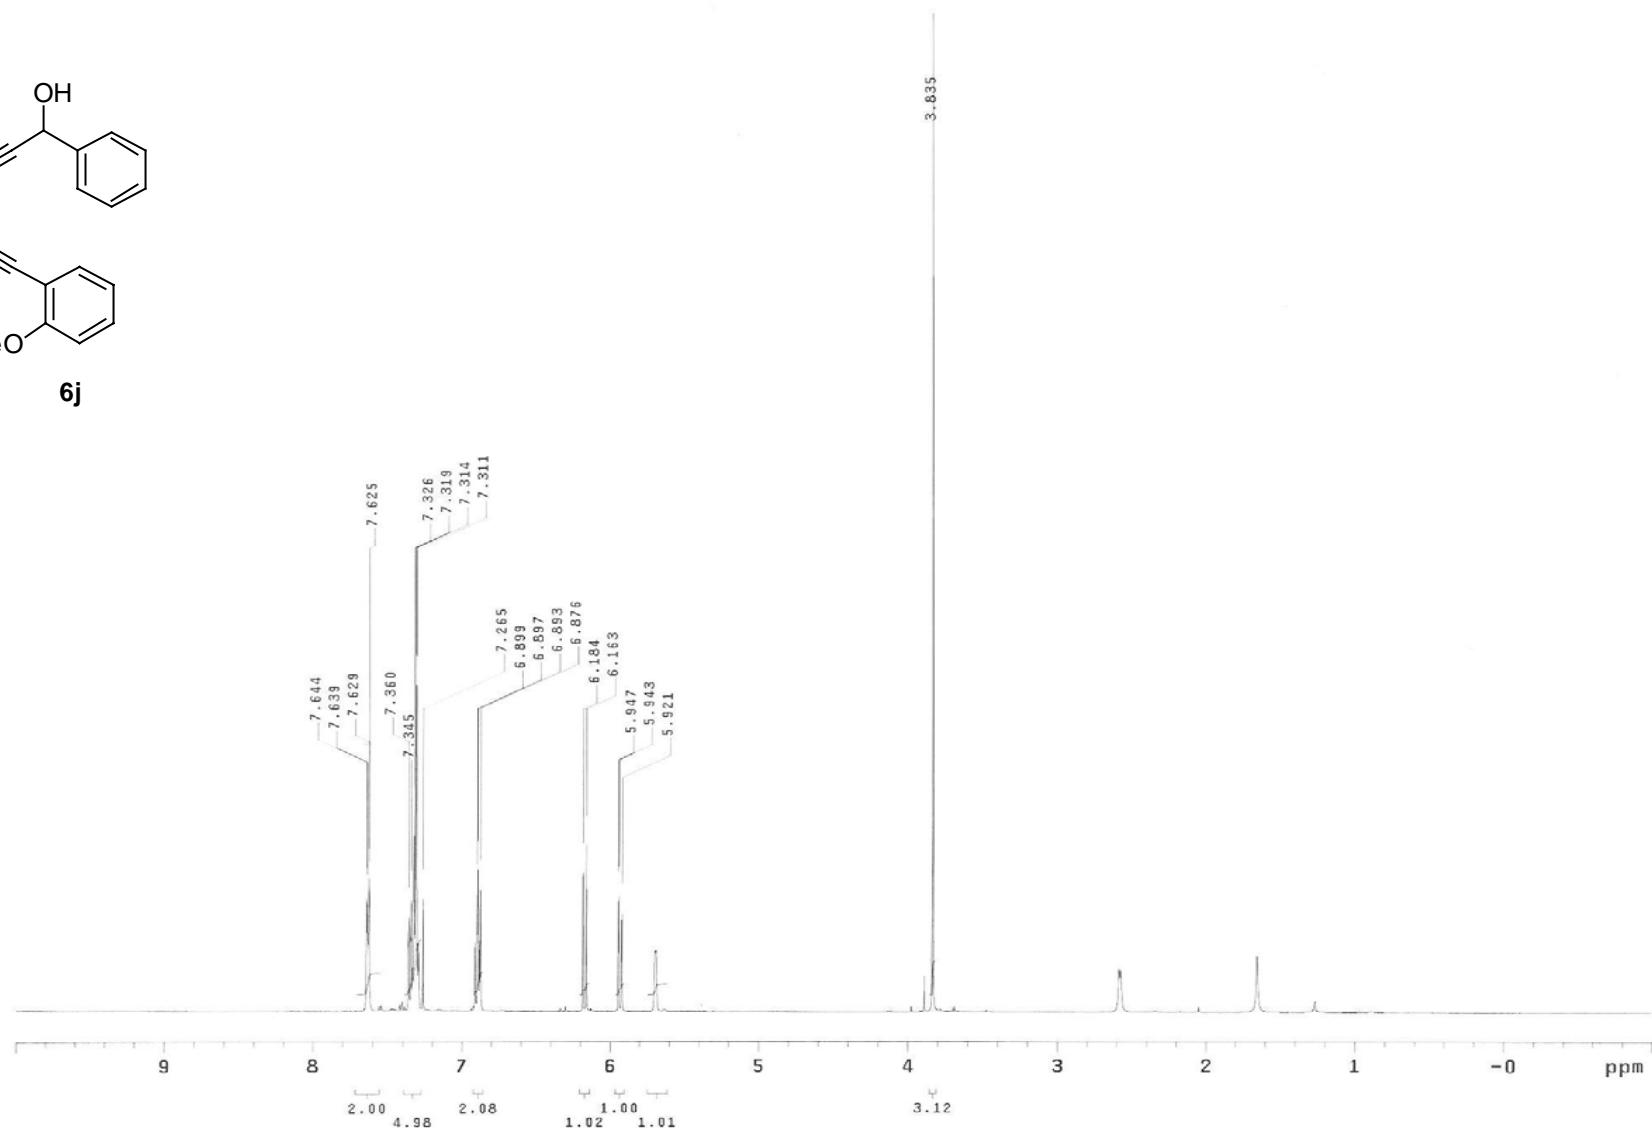

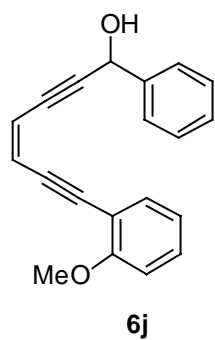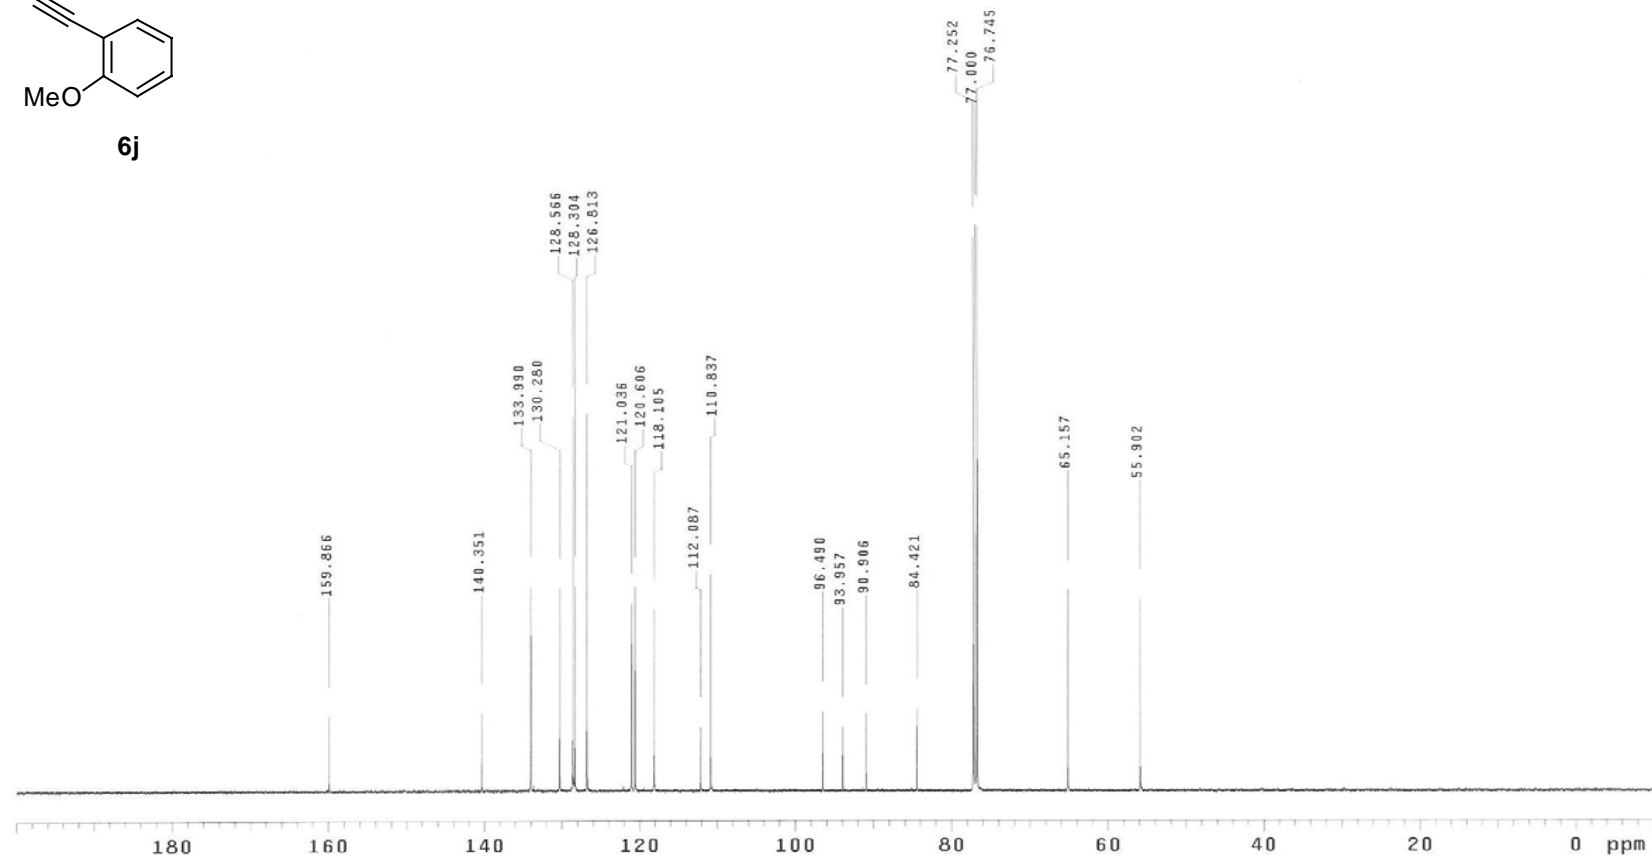

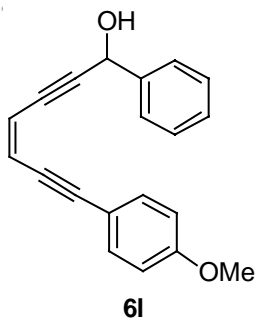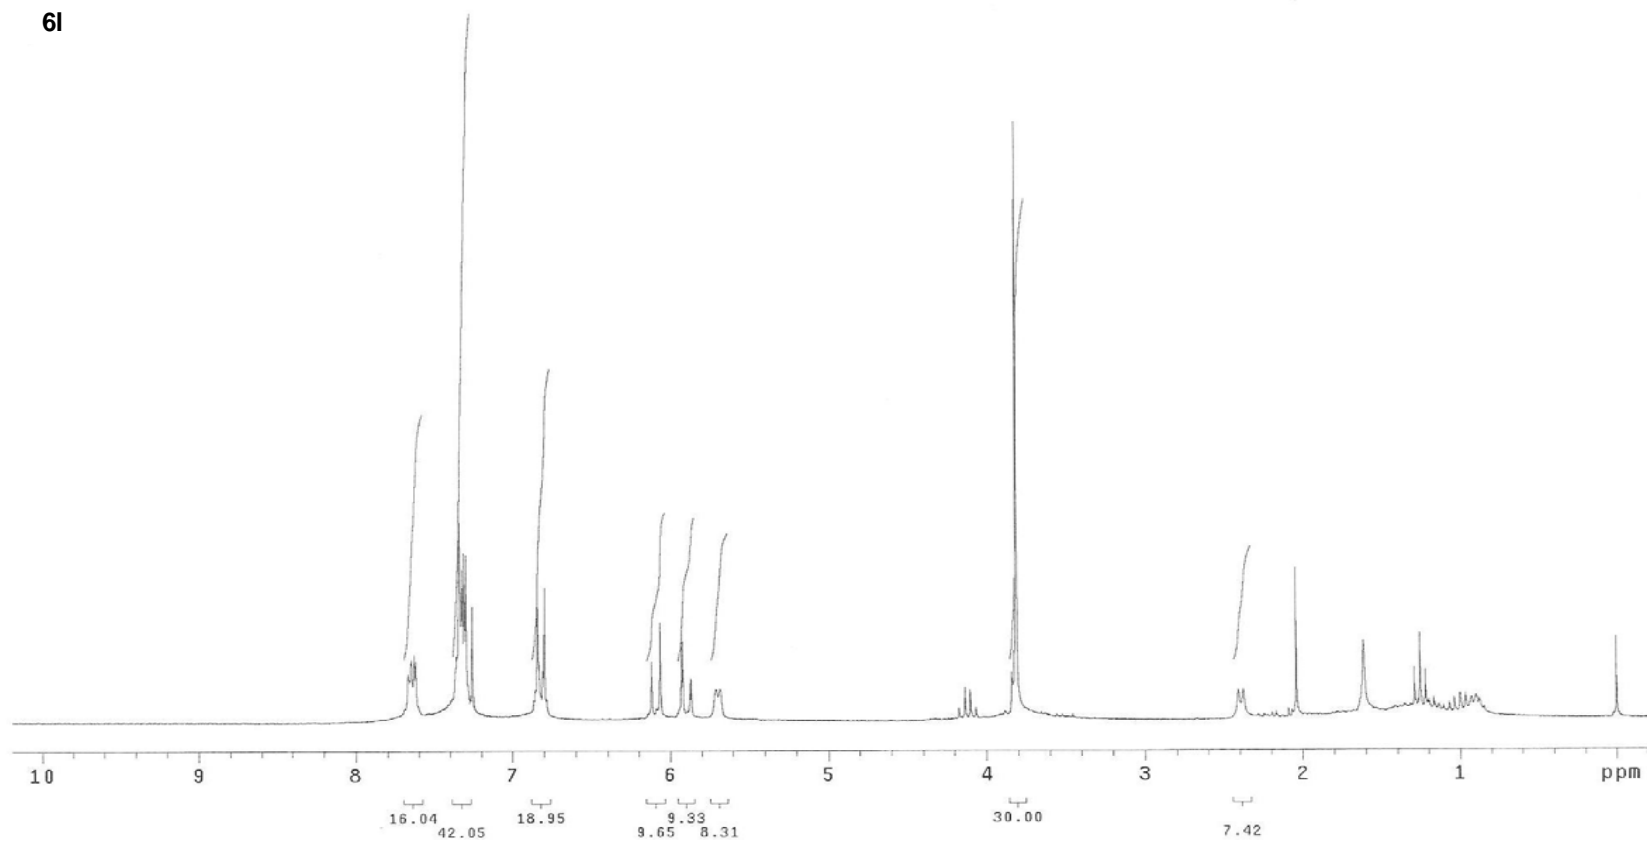

WHJ-140-P4

Pulse Sequence: s2pu1  
Solvent: CDCl3  
Ambient temperature  
GEMINI-200 "oxford200"

Pulse 44.0 degrees  
Acq. time 3.002 sec  
Width 3000.3 Hz  
136 repetitions  
OBSERVE H1, 199.9678376 MHz  
DATA PROCESSING  
FT size 32768  
Total time 2 hr, 50 min, 36 sec

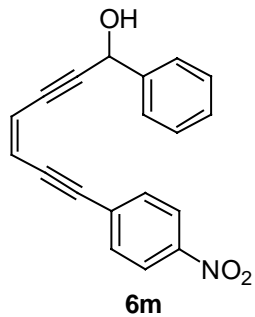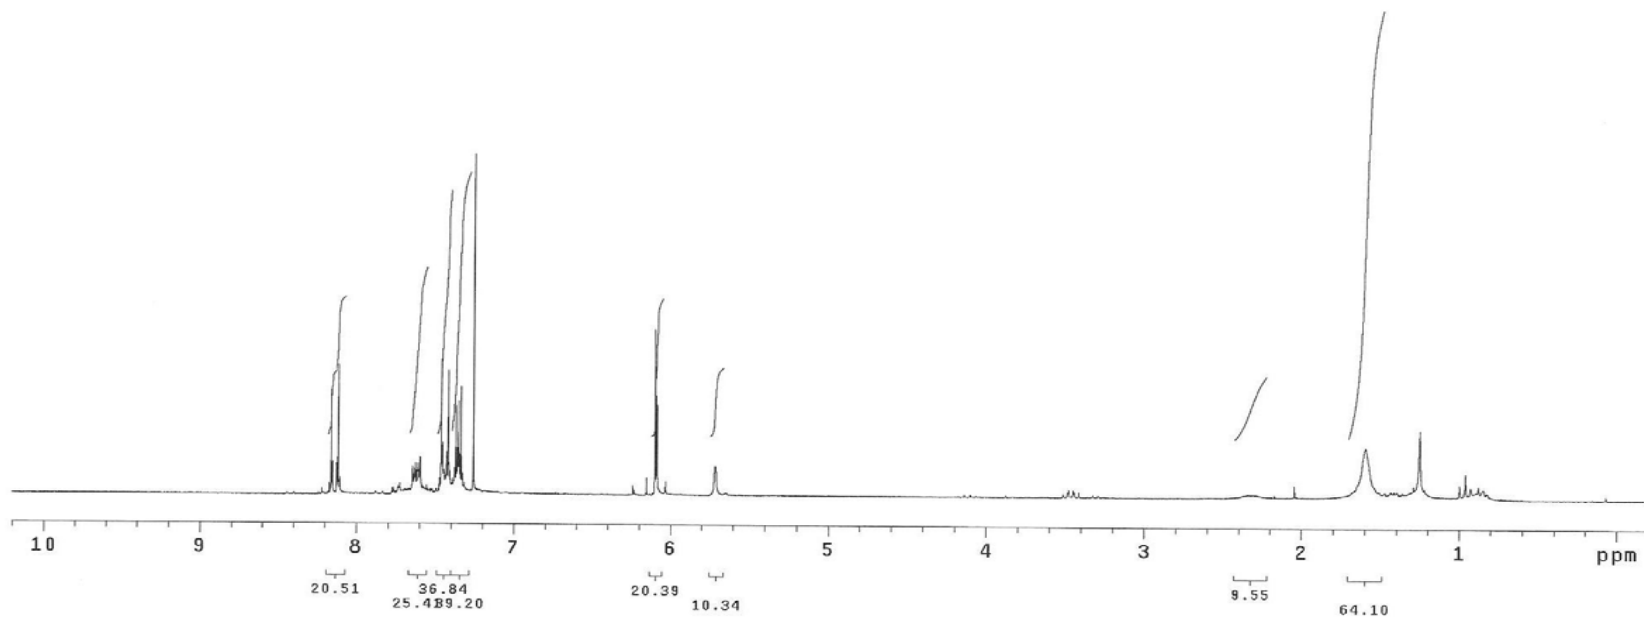

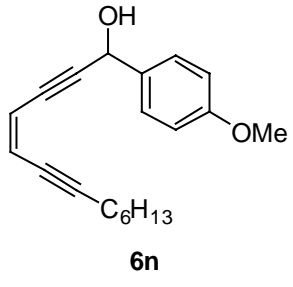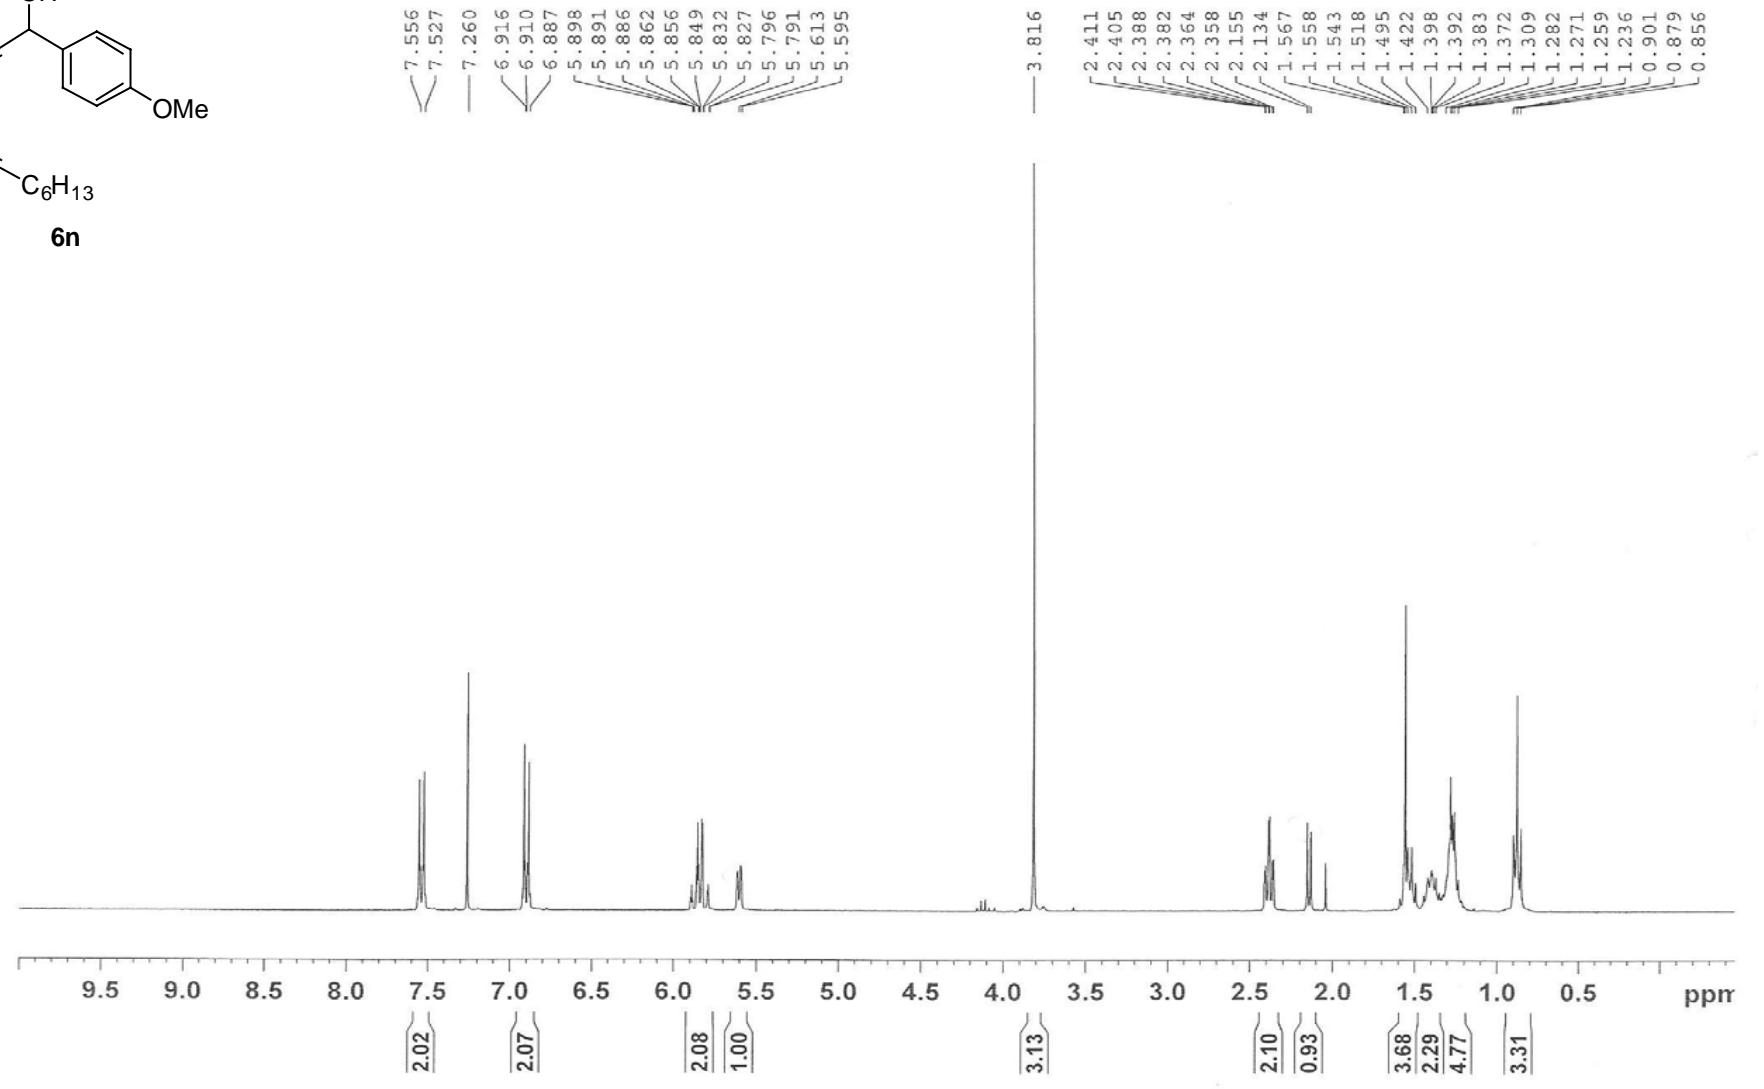

WHC-121-2

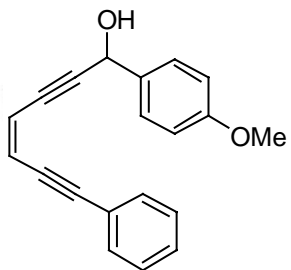

60

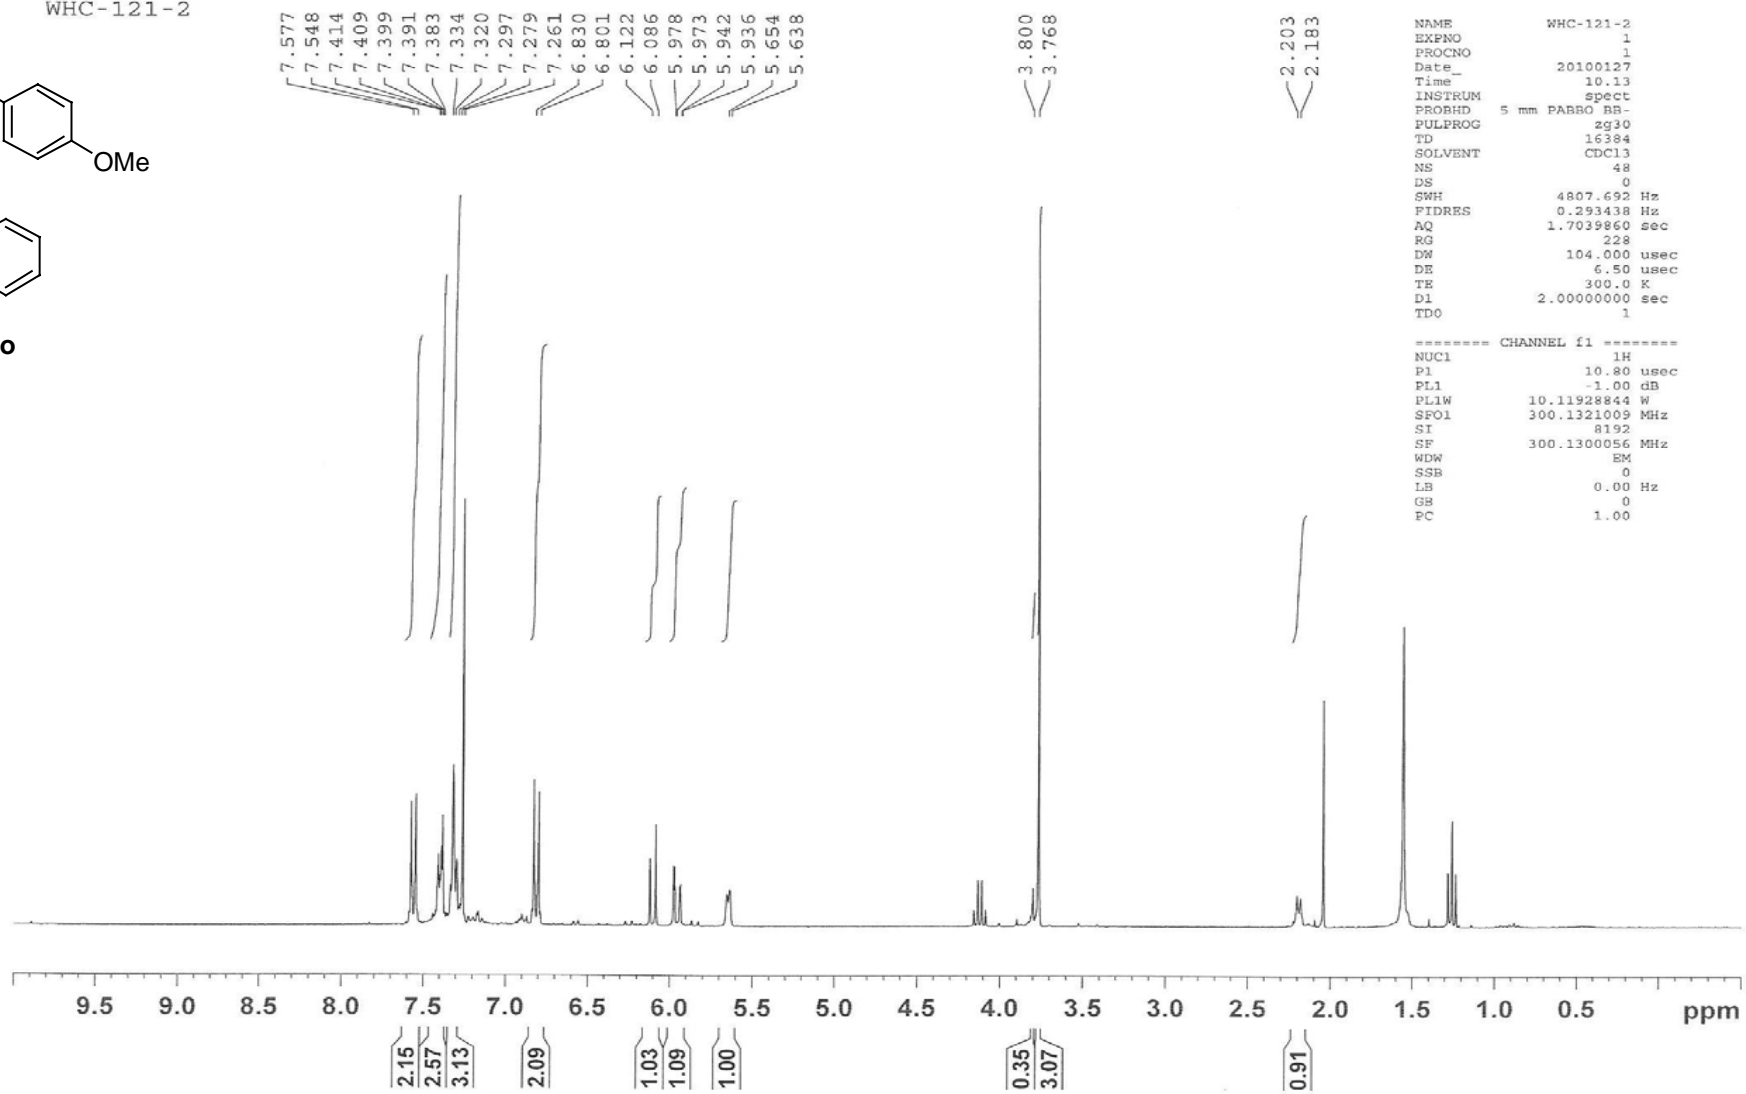

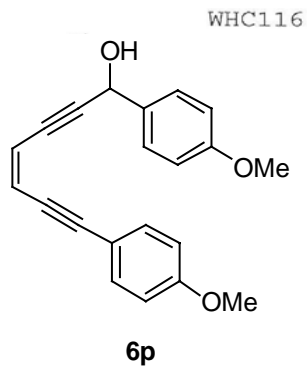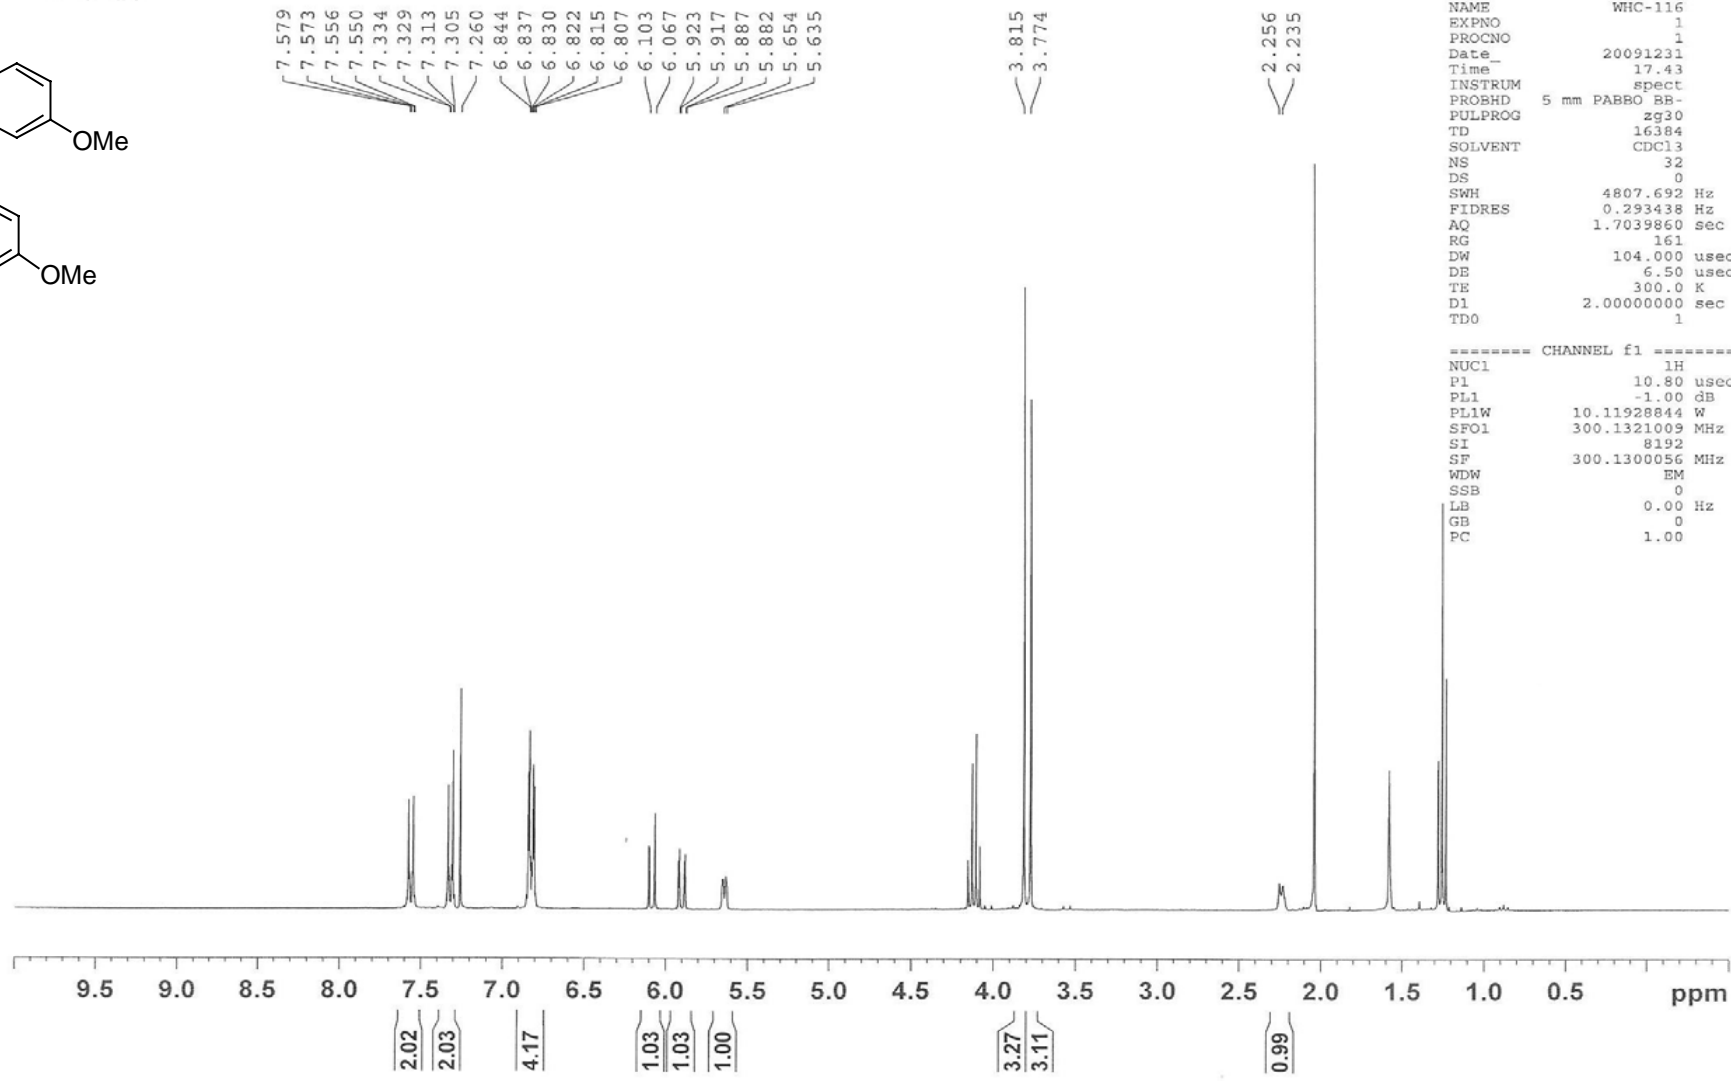

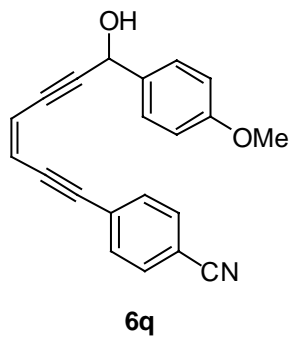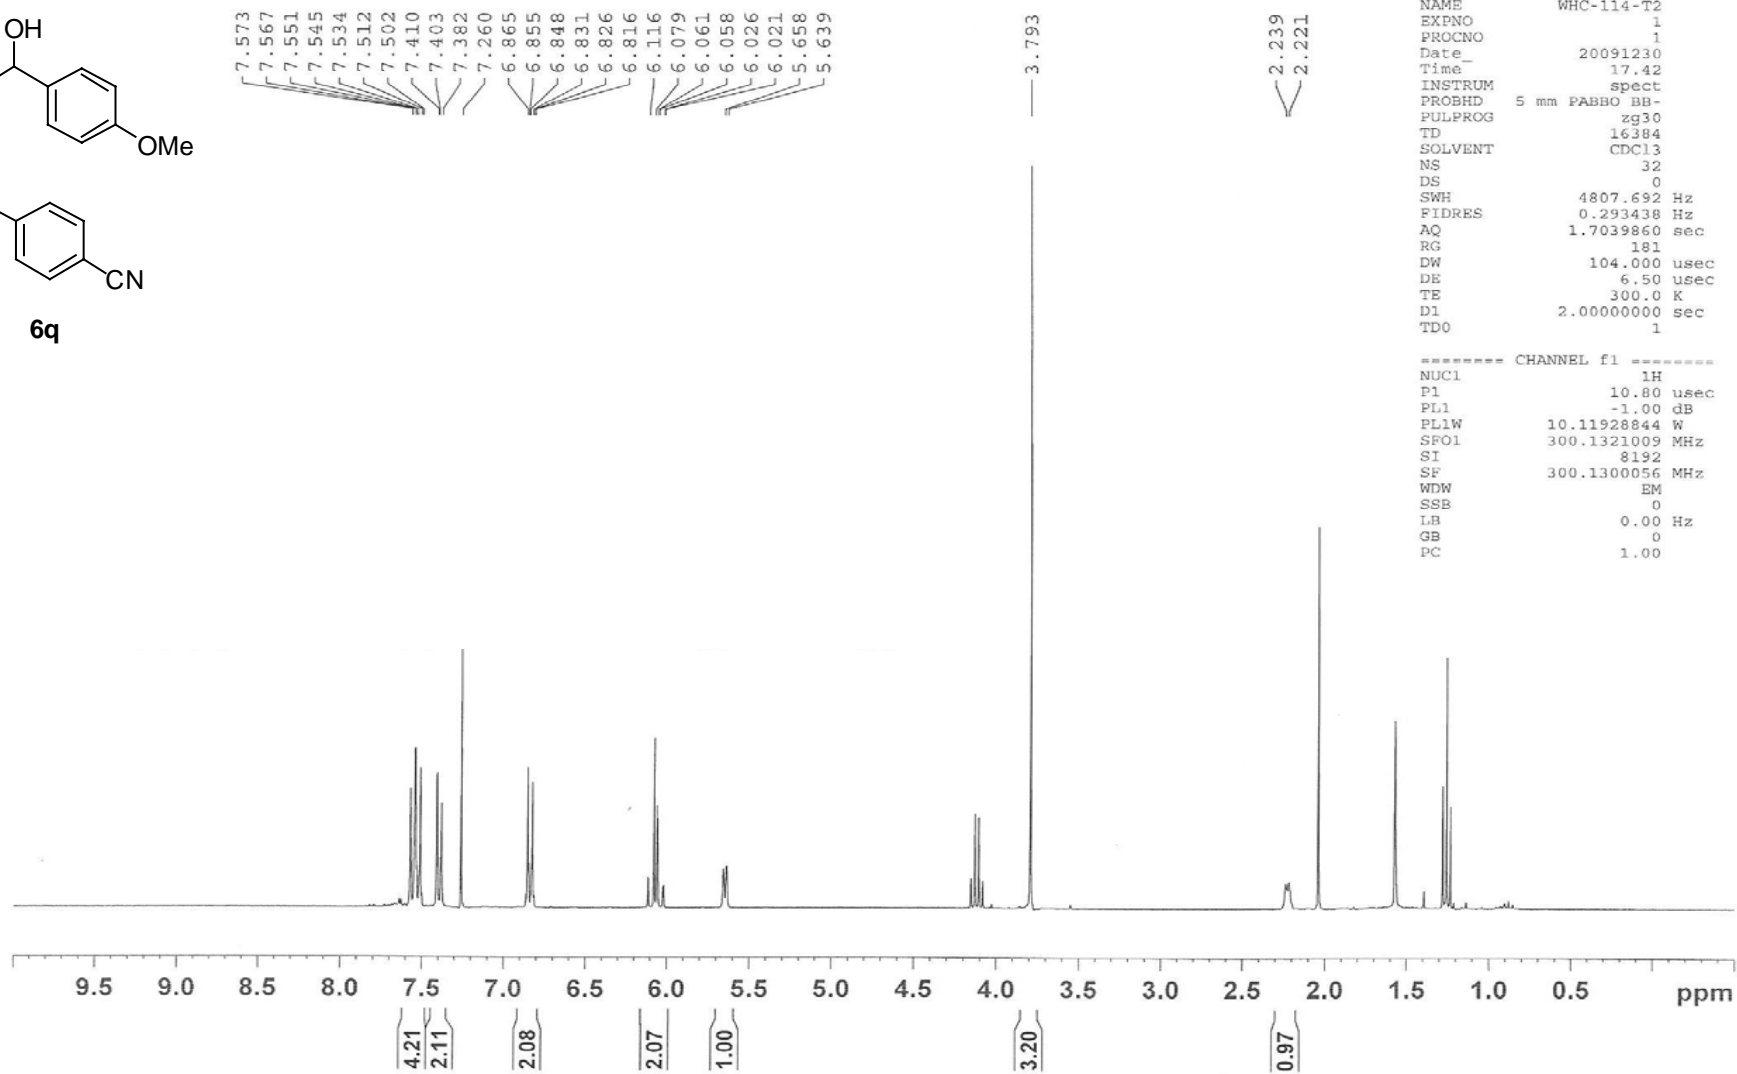



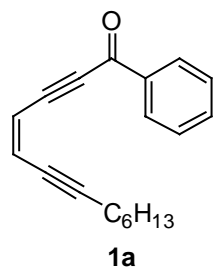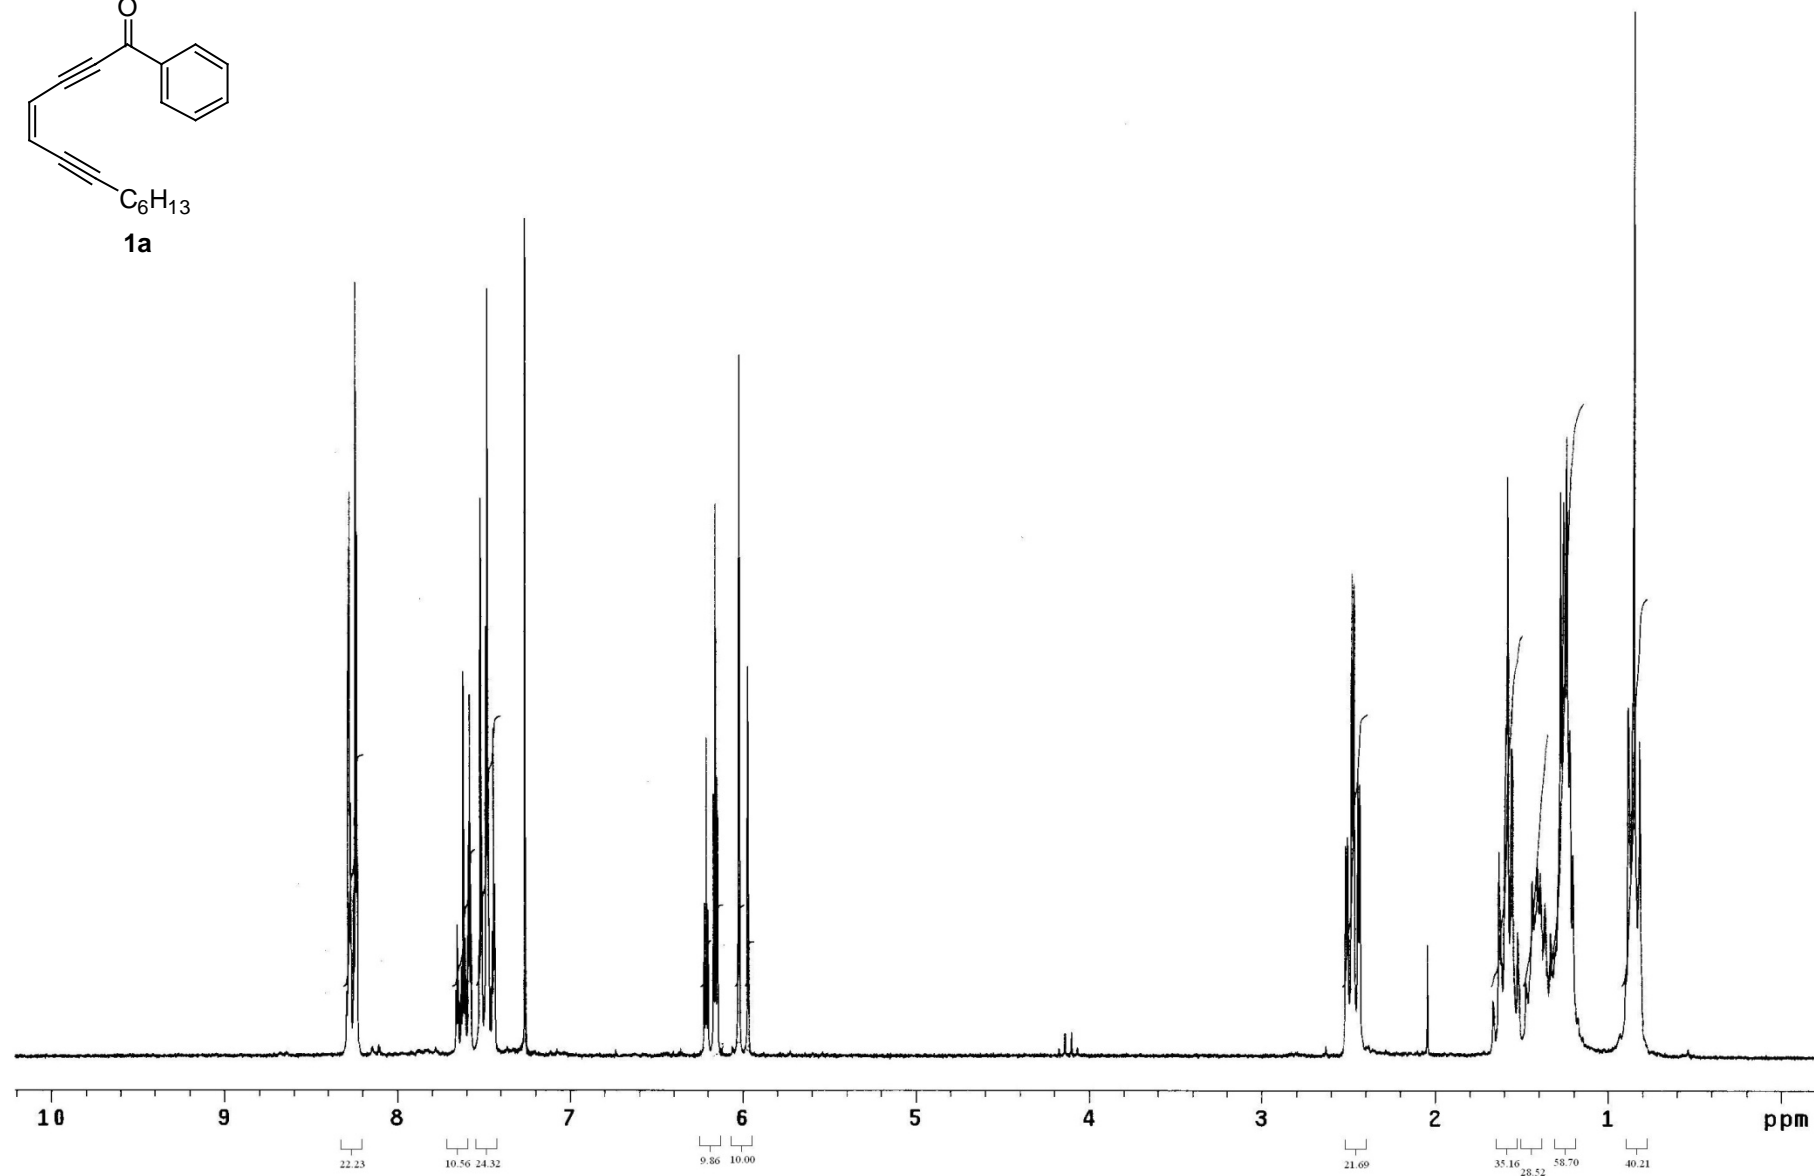

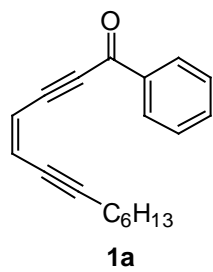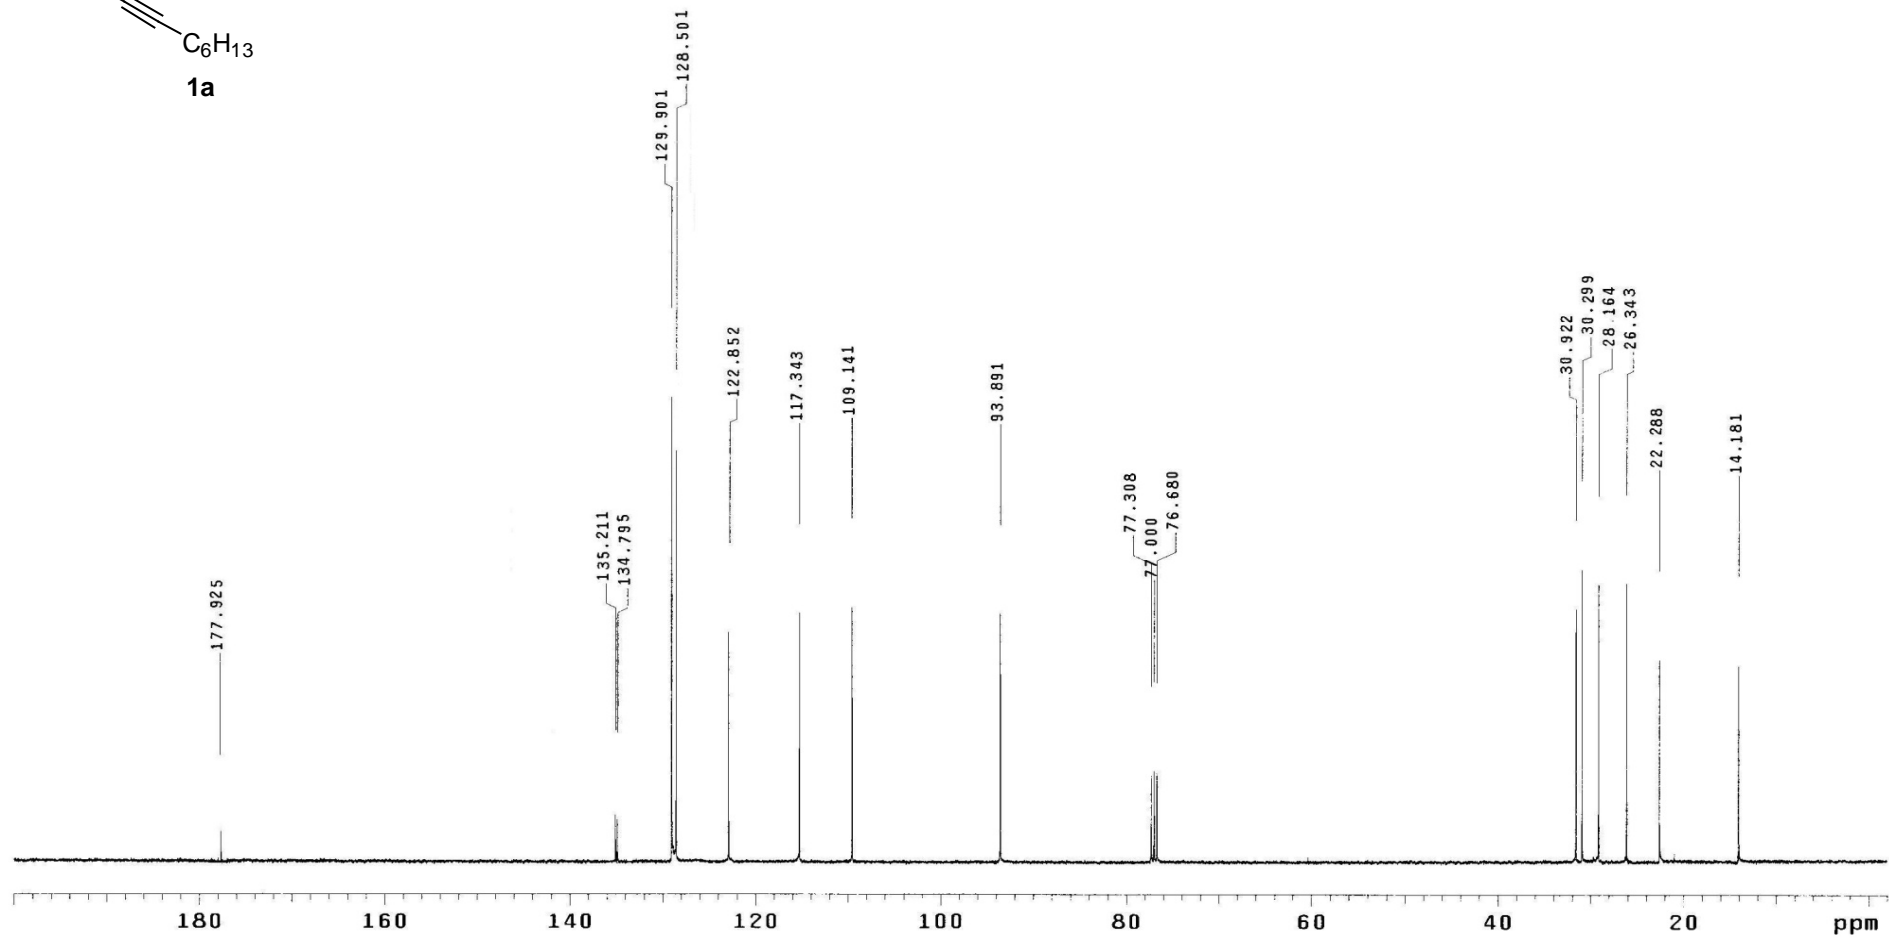

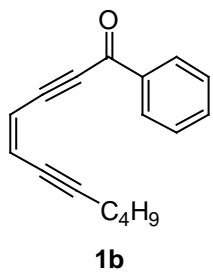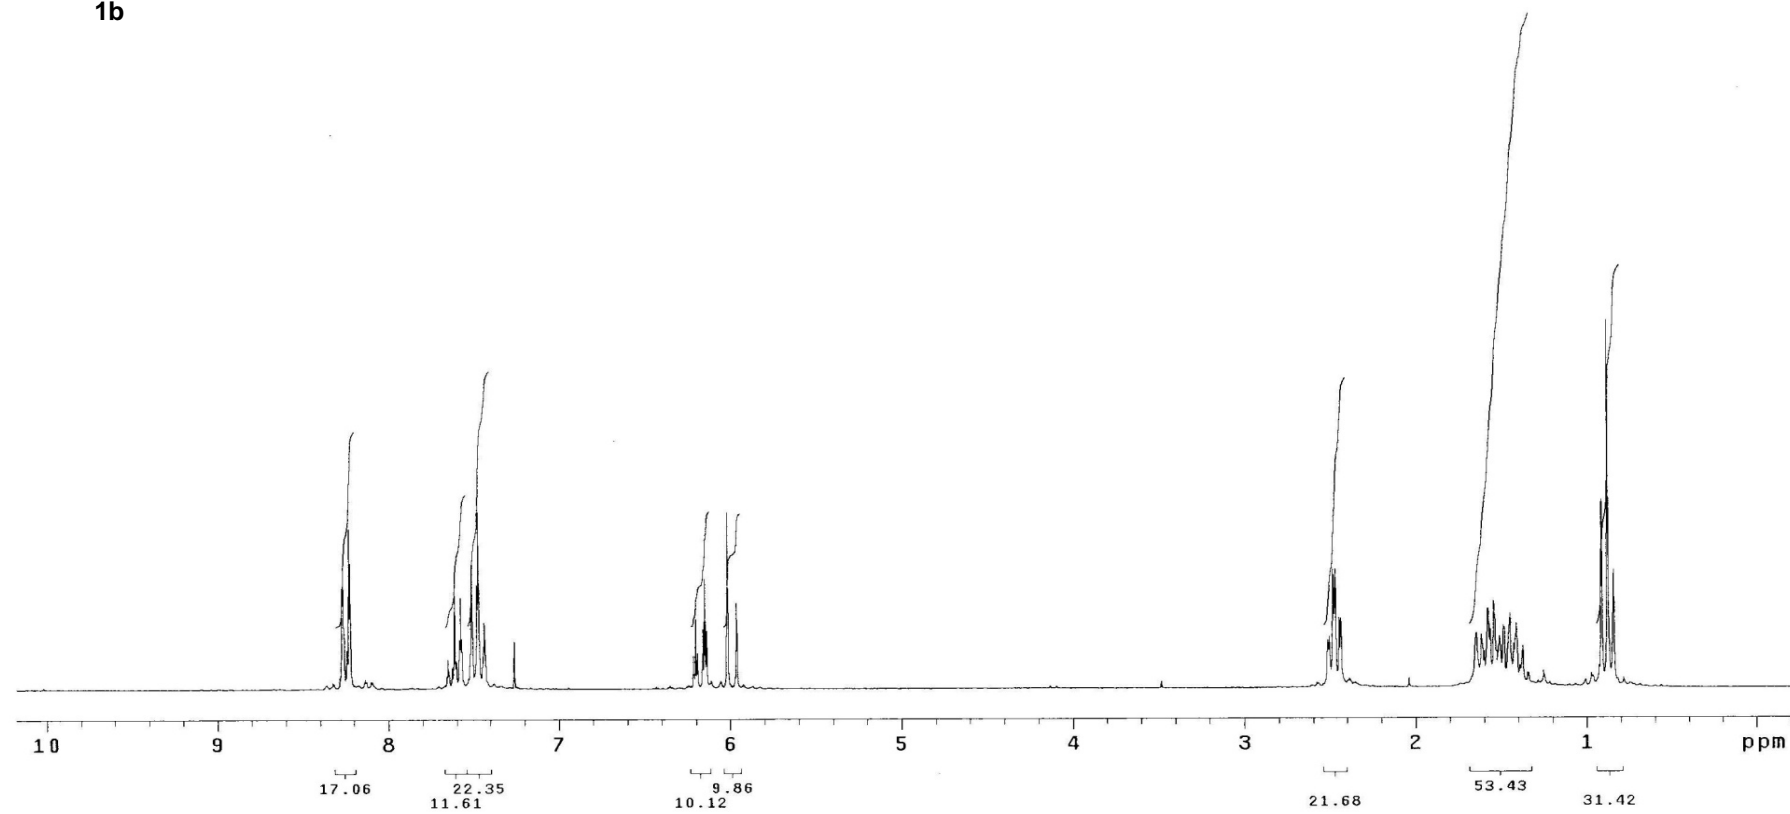

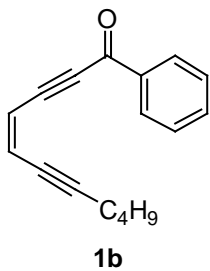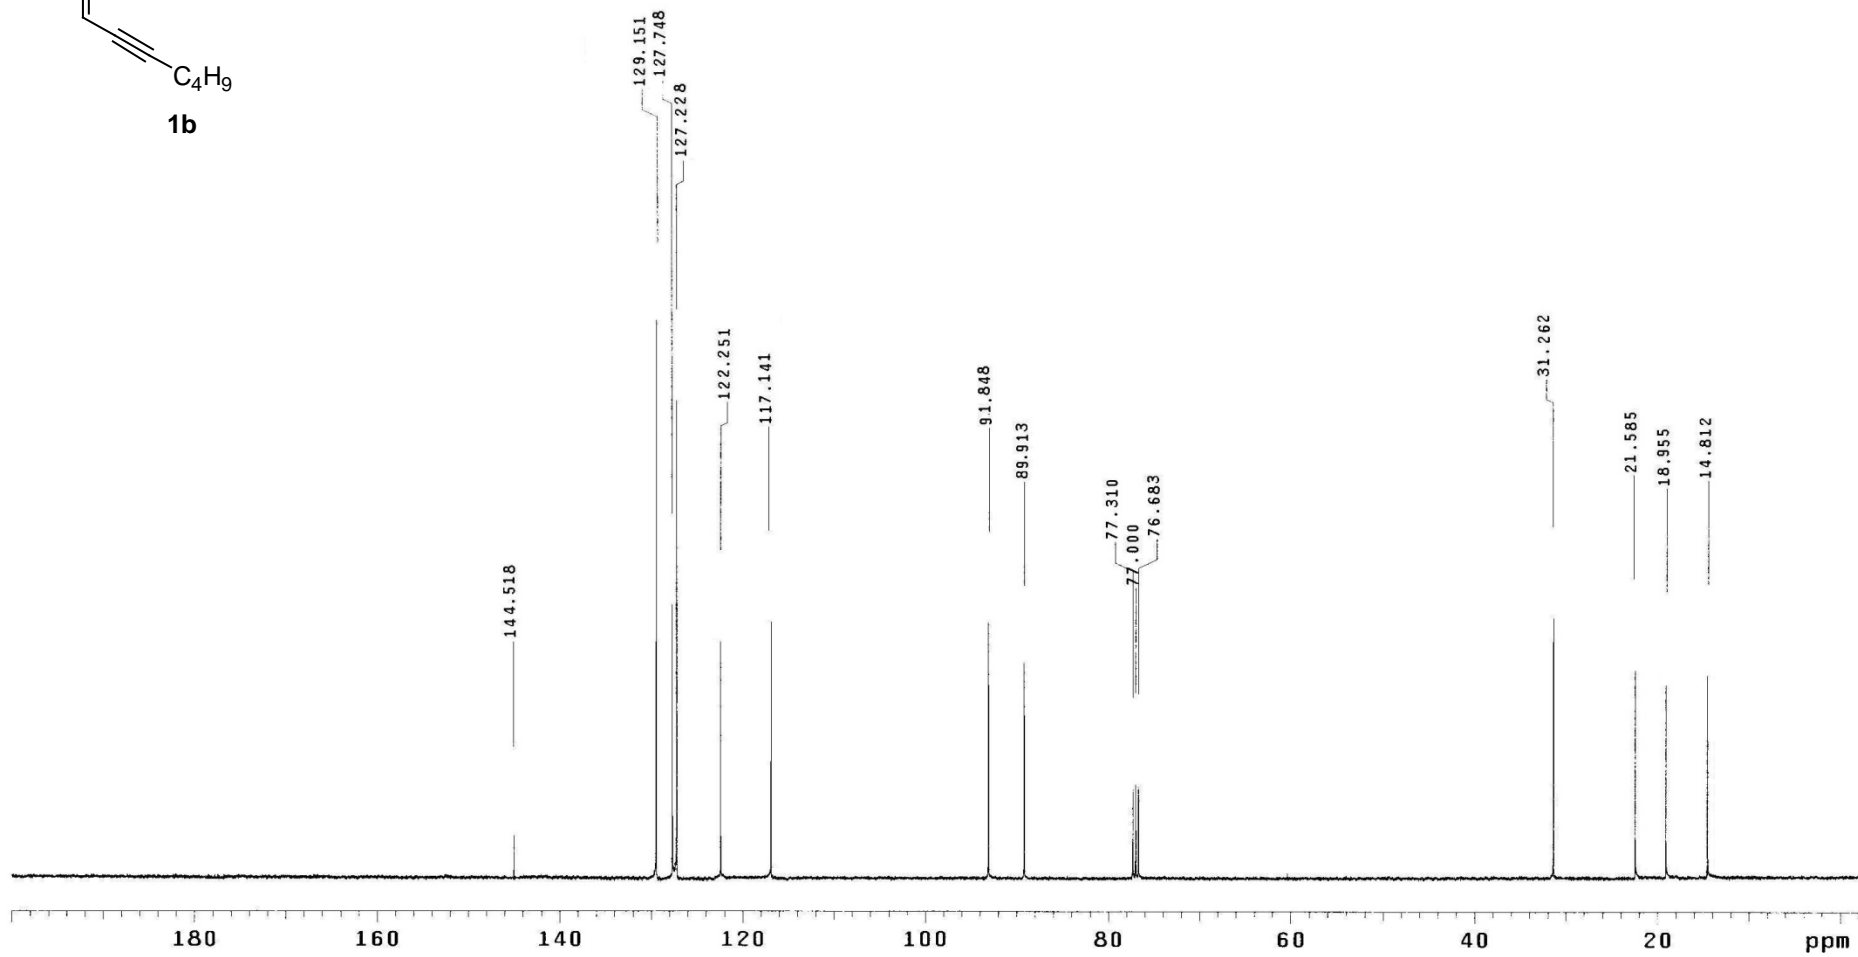

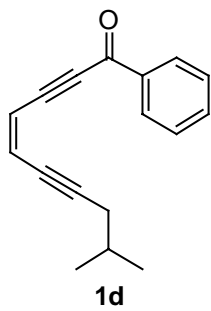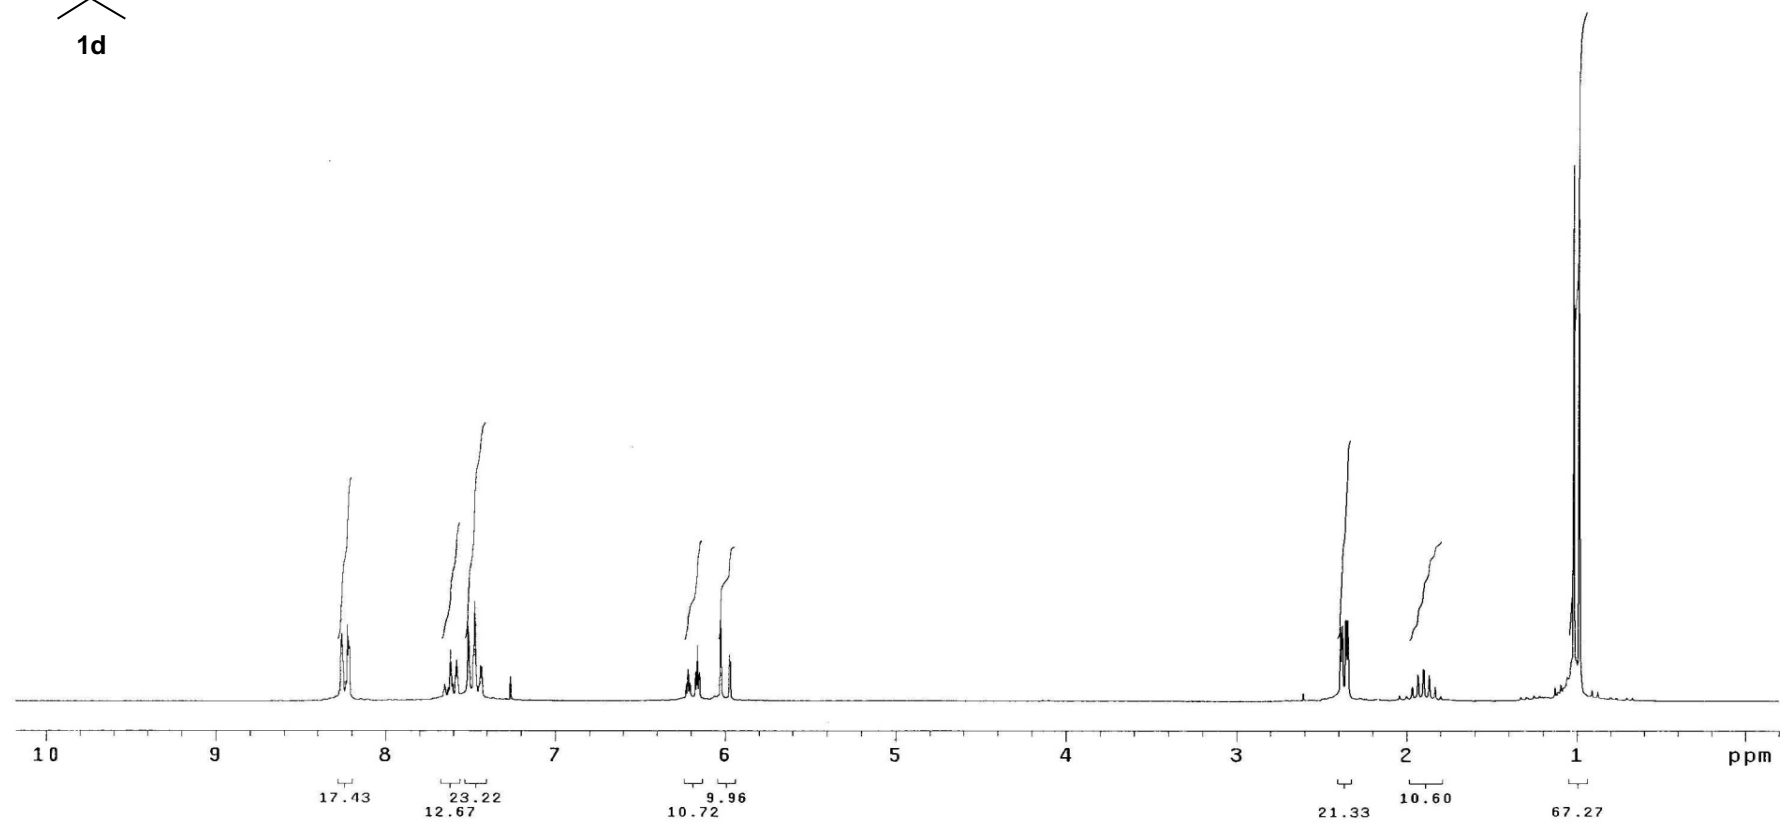

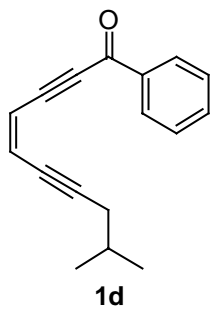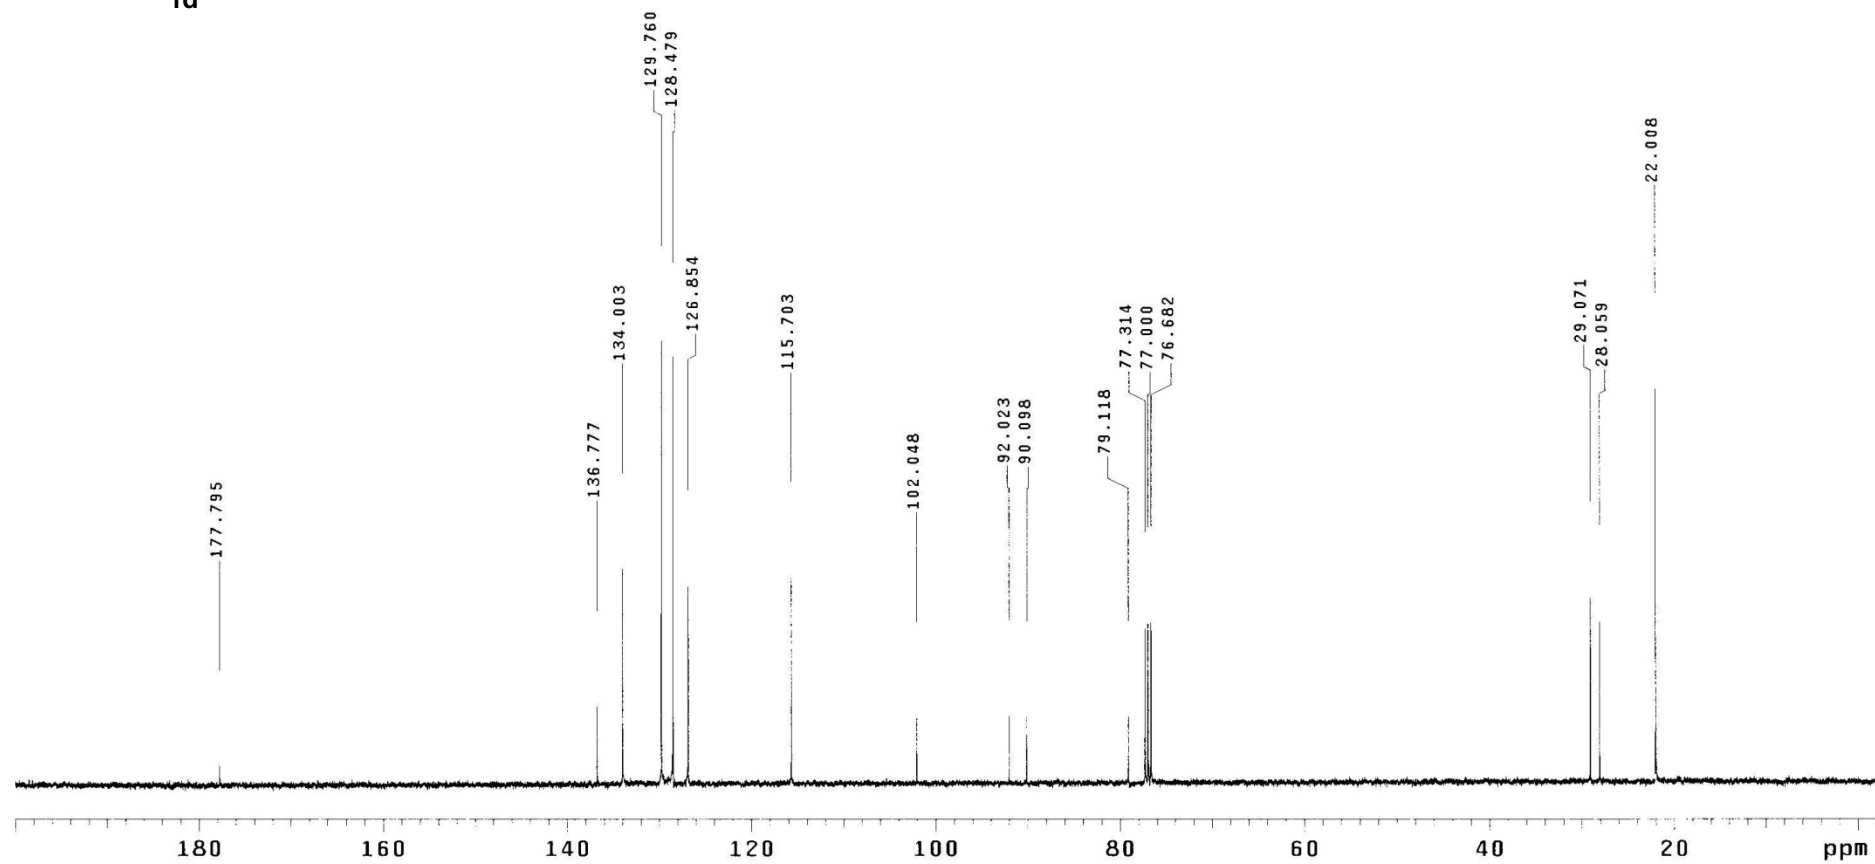

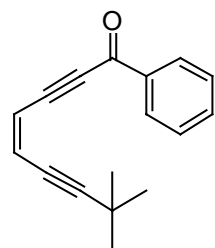

1e

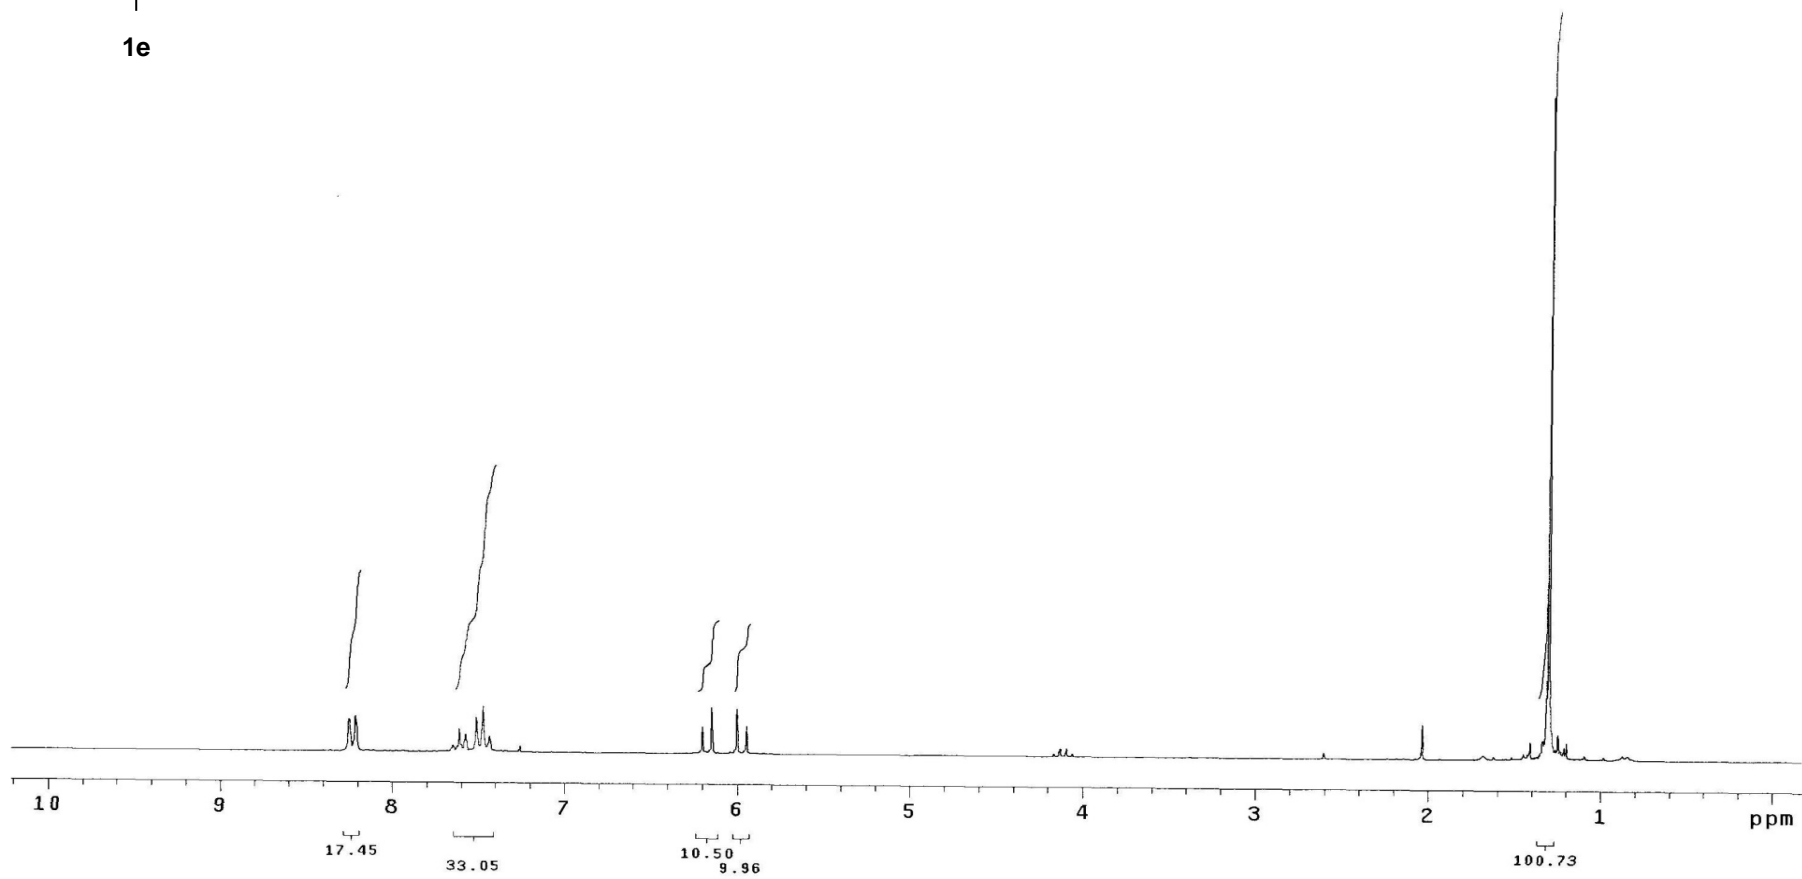

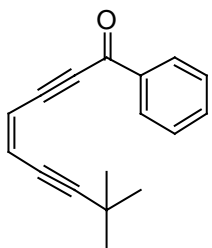

1e

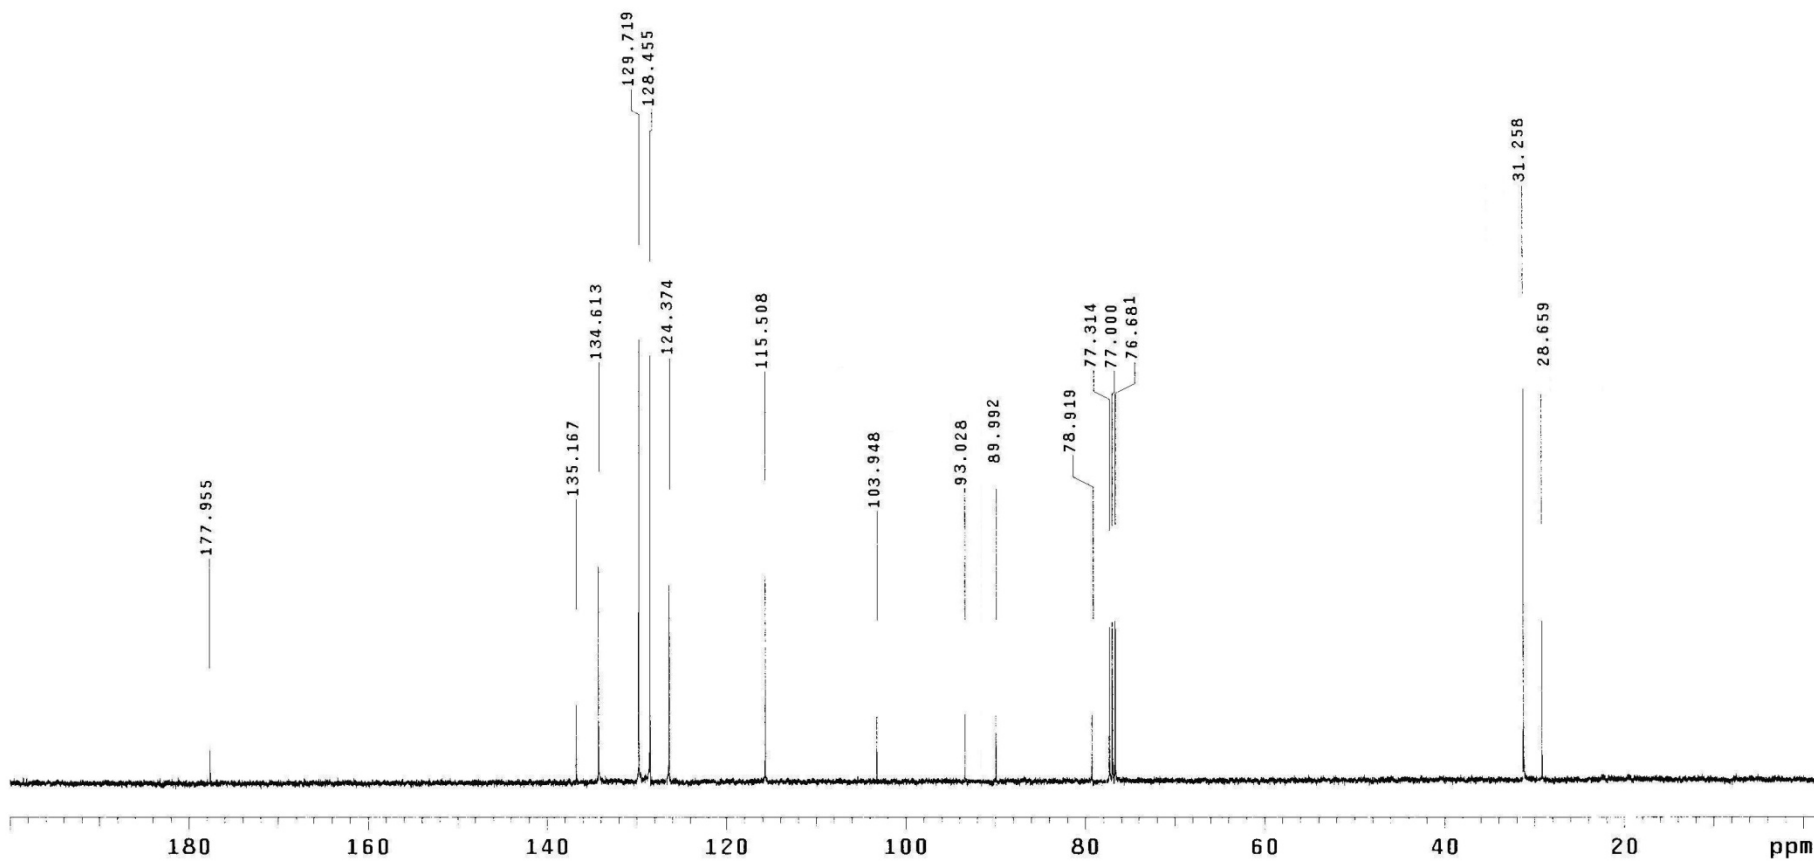



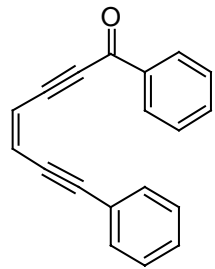

1f

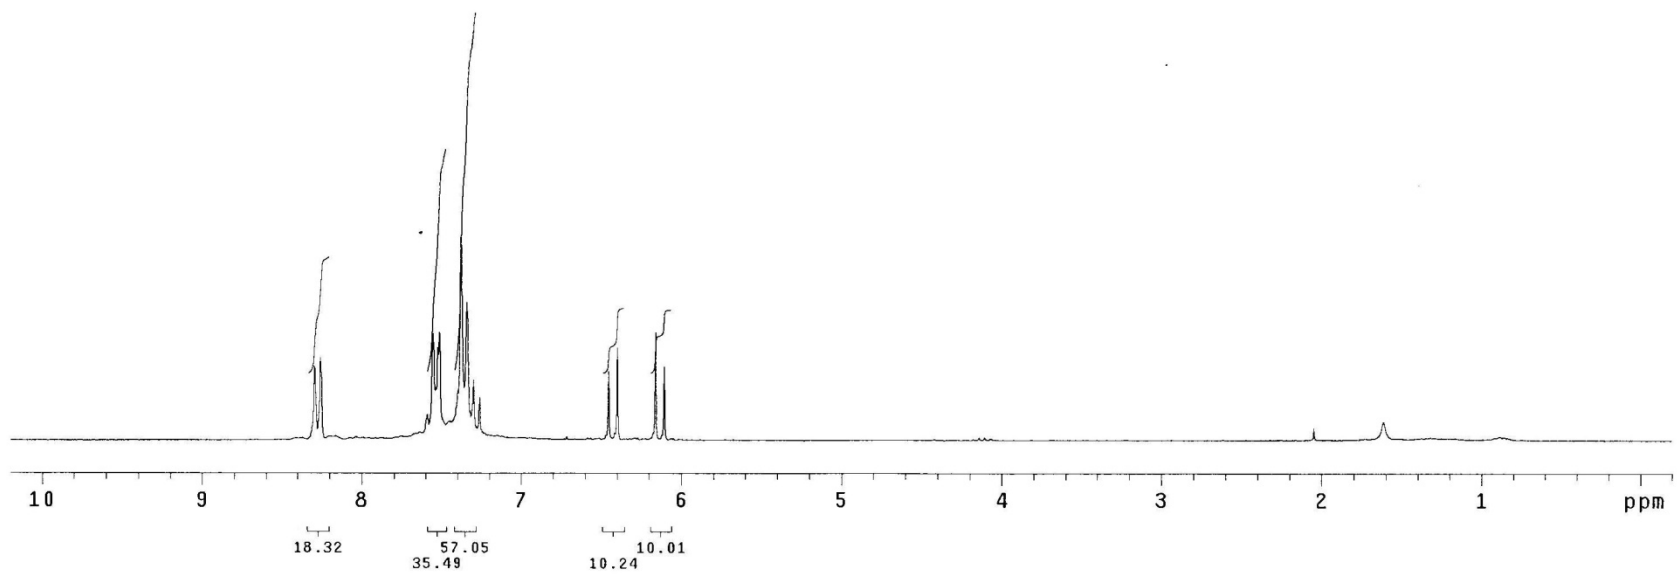

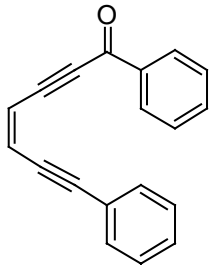

1f

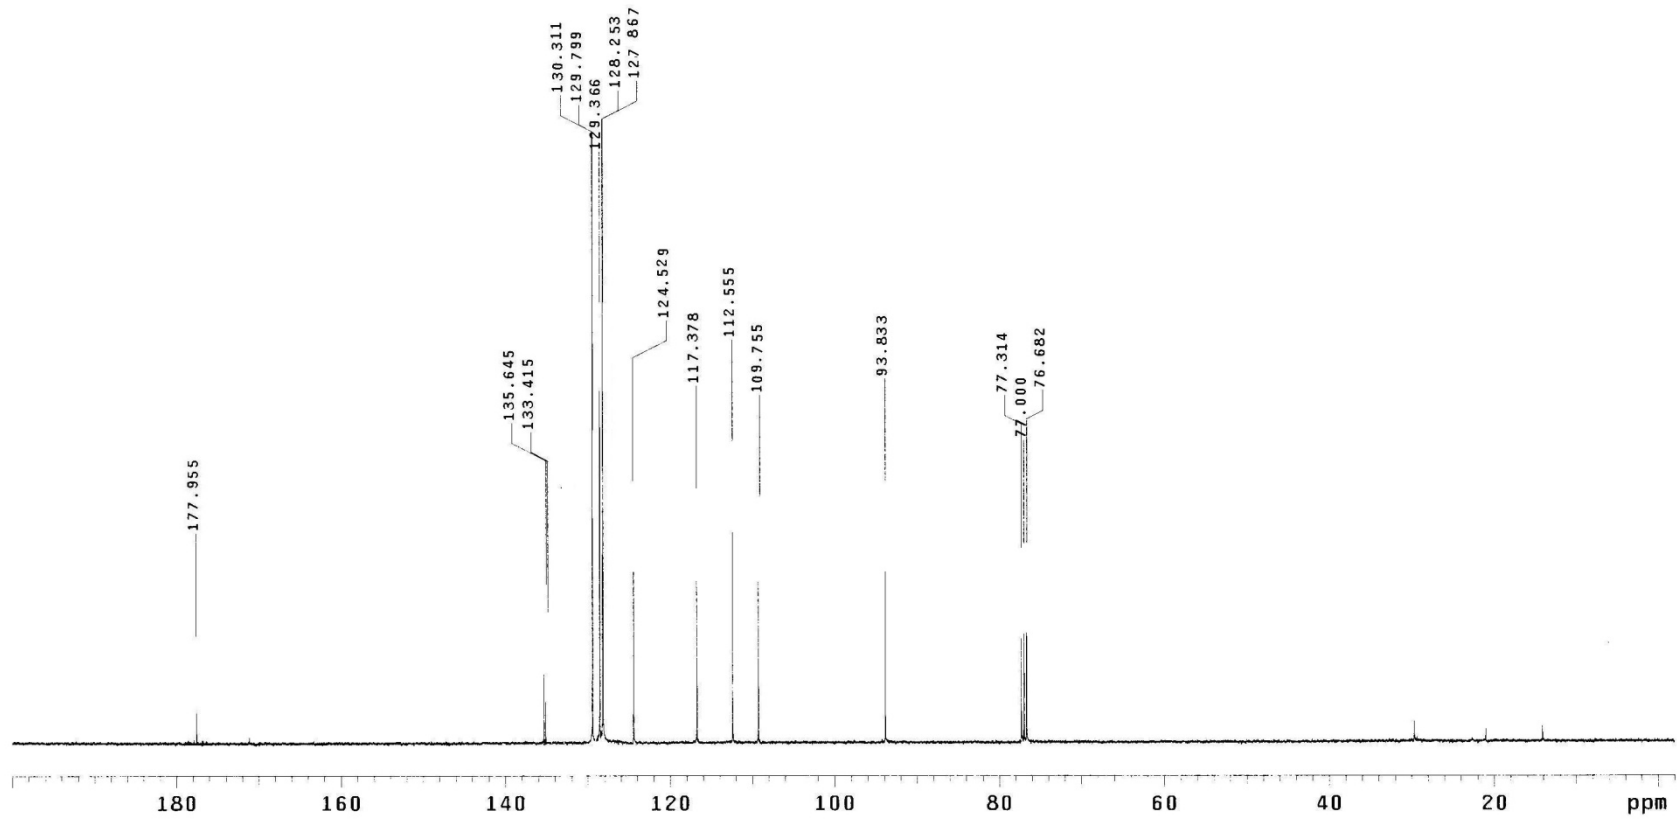

WHJ-217

Mercury-400BB "Mercuryplus400"  
Date: Mar 31 2008  
Solvent: CDCl3  
Ambient temperature  
Total 48 repetitions

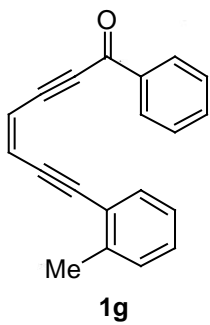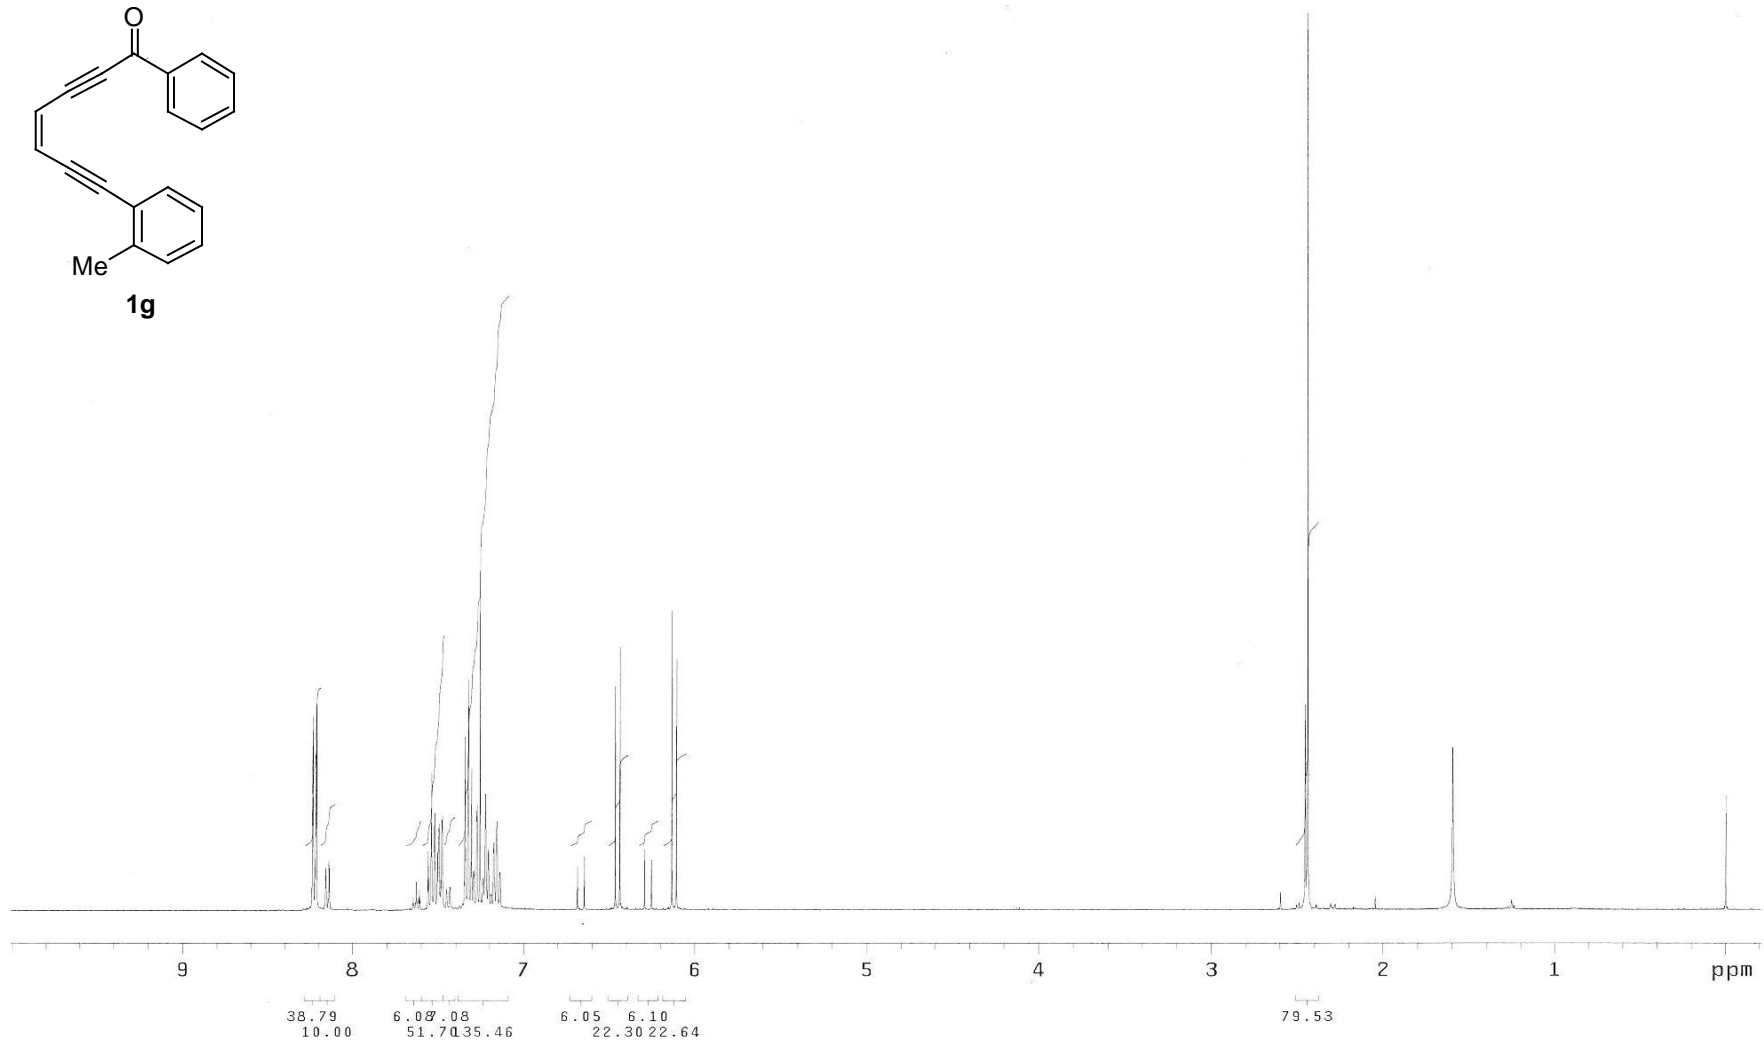

WHJ-217

Mercury-400BB "Mercuryplus400"  
Date: Mar 31 2008  
Solvent: CDCl3  
Ambient temperature  
Total 3744 repetitions

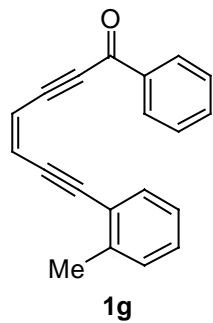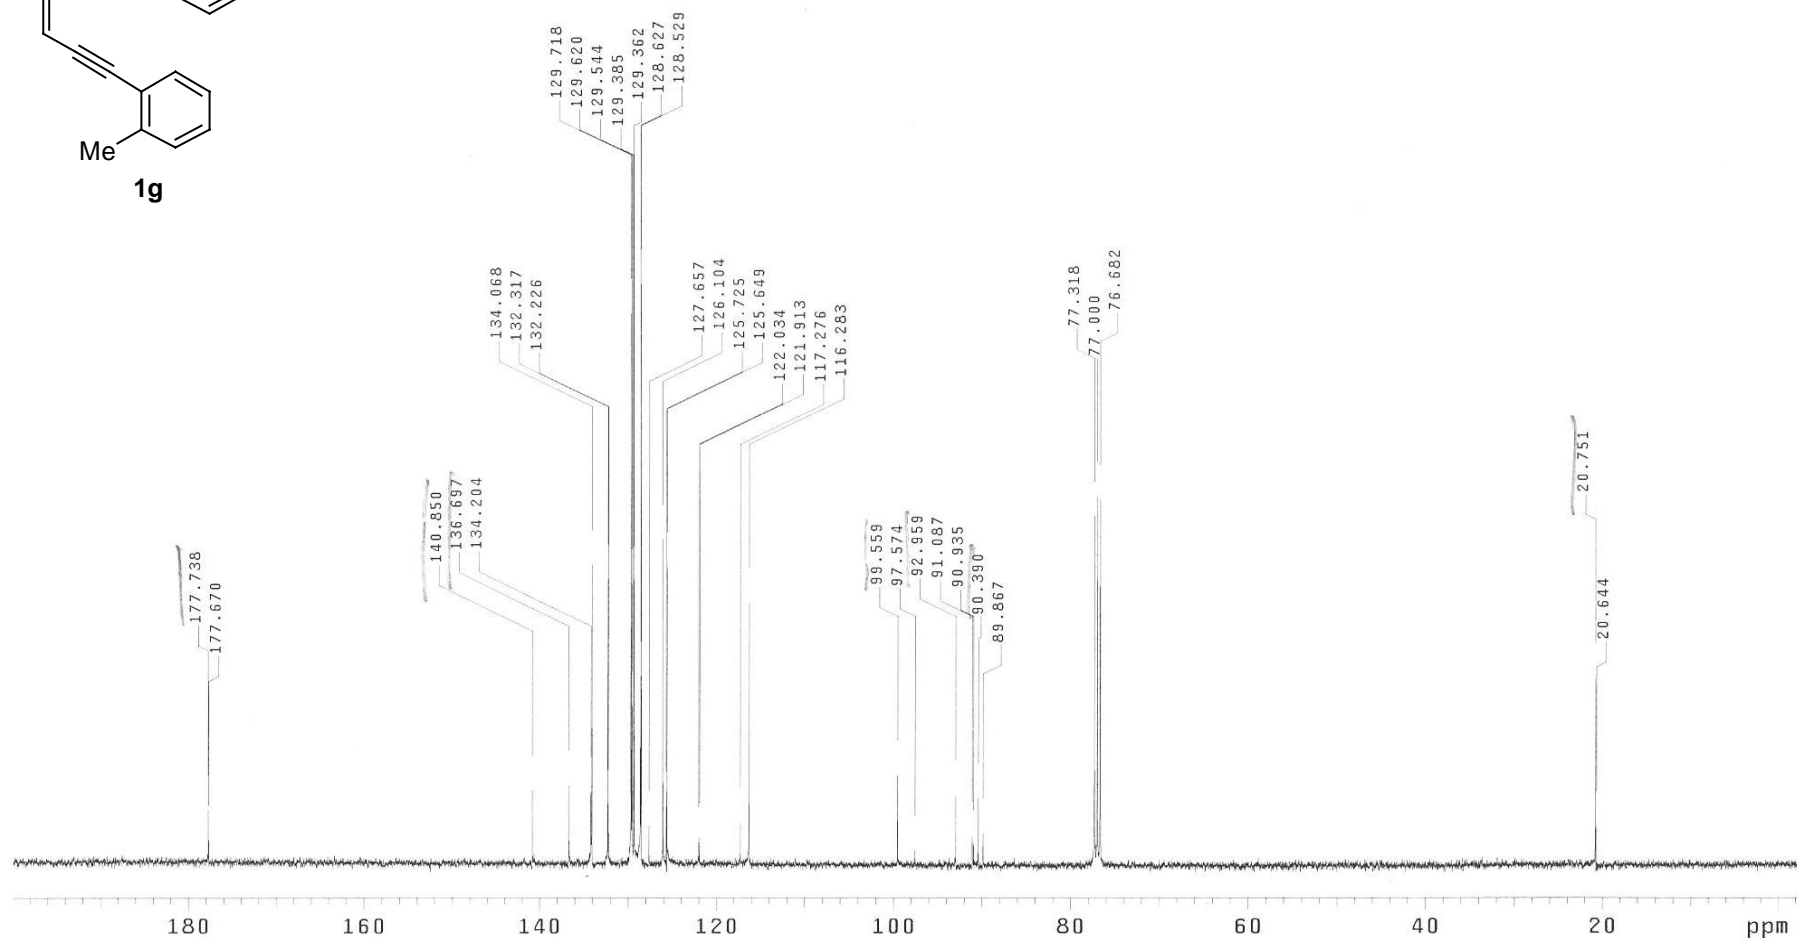

WHJ-214

Mercury-400BB "Mercuryplus400"  
Date: Mar 27 2008  
Solvent: CDCl3  
Ambient temperature  
Total 36 repetitions

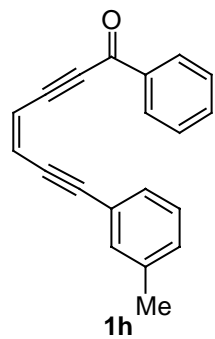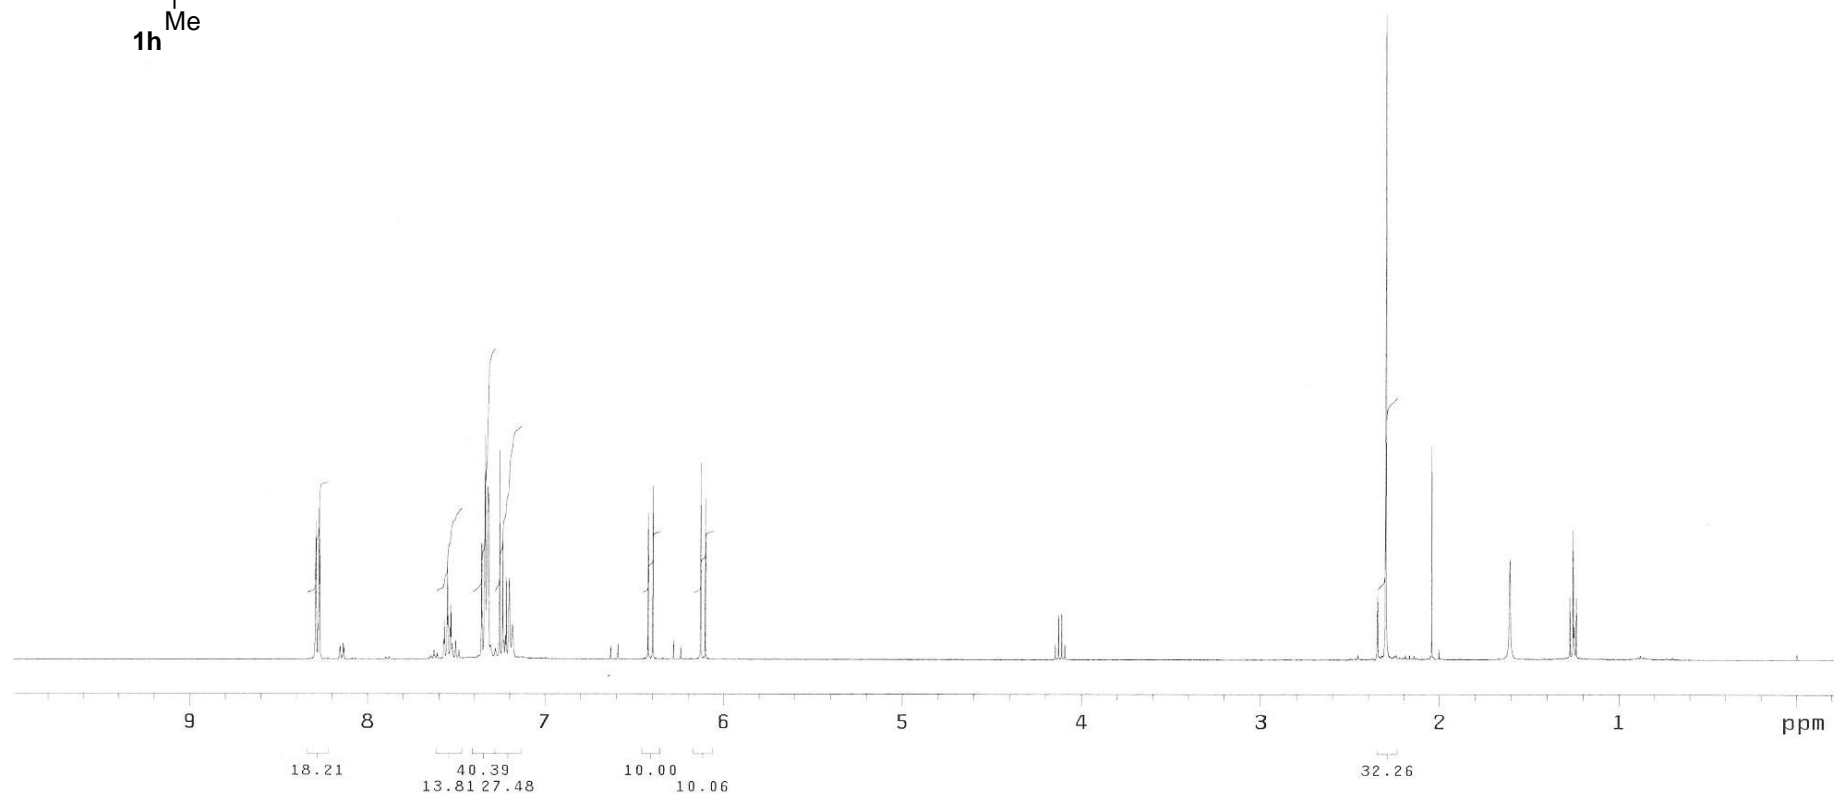

S-6U

WHJ-214

Mercury-400BB "Mercuryplus400"  
Date: Mar 27 2008  
Solvent: CDCl3  
Ambient temperature  
Total 1568 repetitions

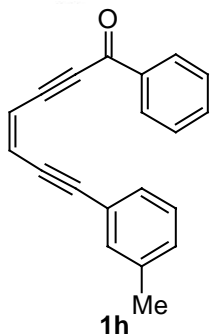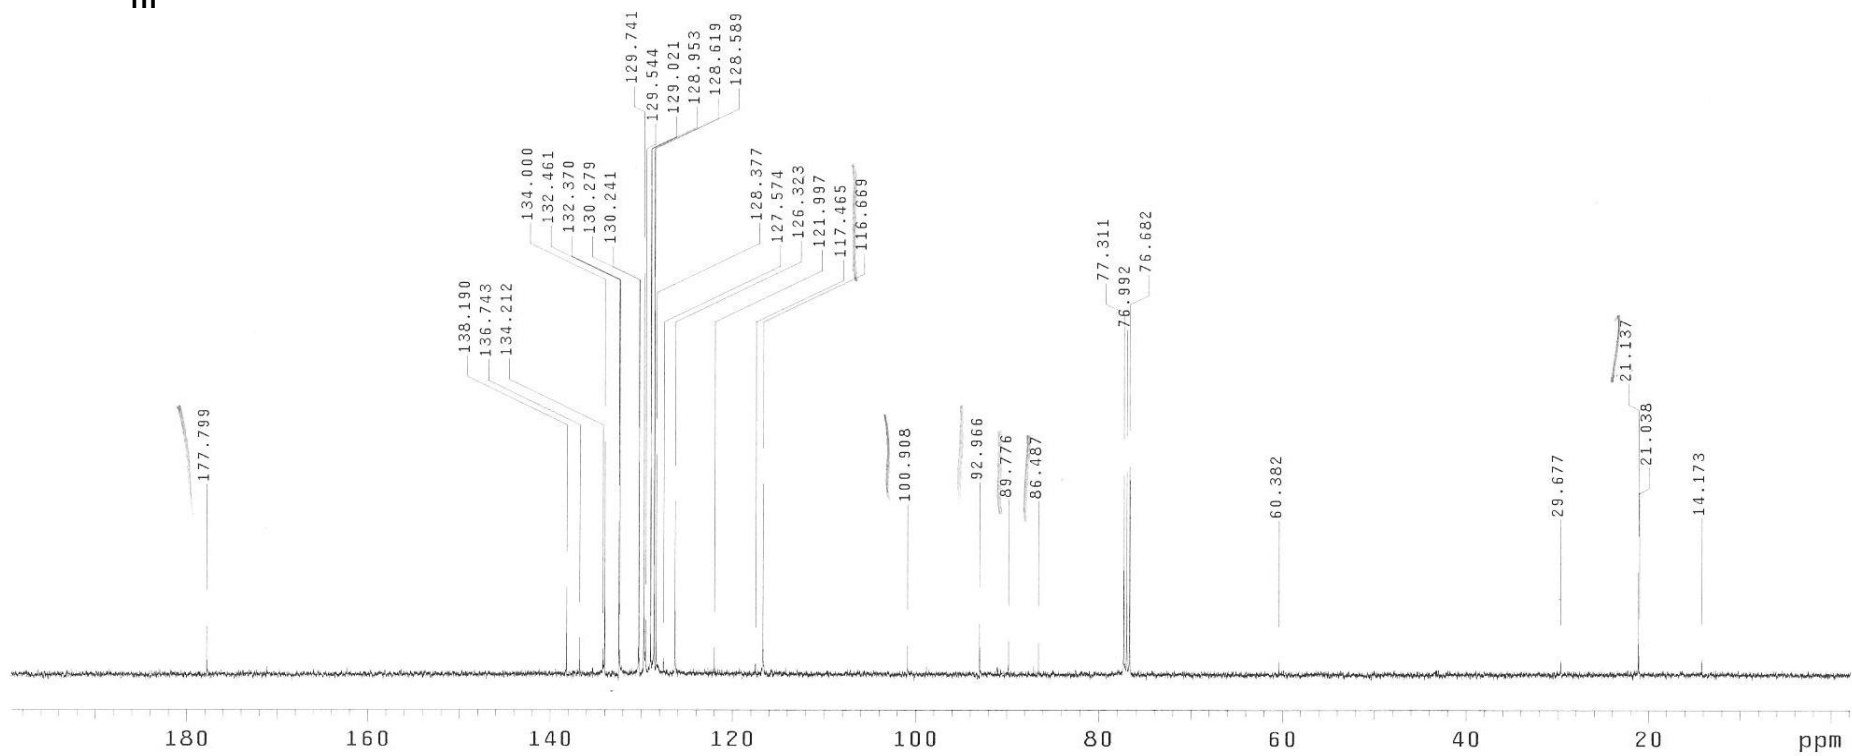

WHC-034-2

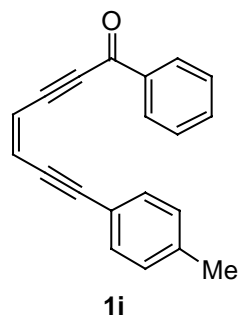

8.294  
8.291  
8.273  
8.267  
8.262  
7.585  
7.567  
7.561  
7.539  
7.536  
7.532  
7.434  
7.429  
7.407  
7.401  
7.387  
7.382  
7.361  
7.342  
7.336  
7.260  
7.168  
7.141  
6.427  
6.391  
6.114  
6.079

2.381

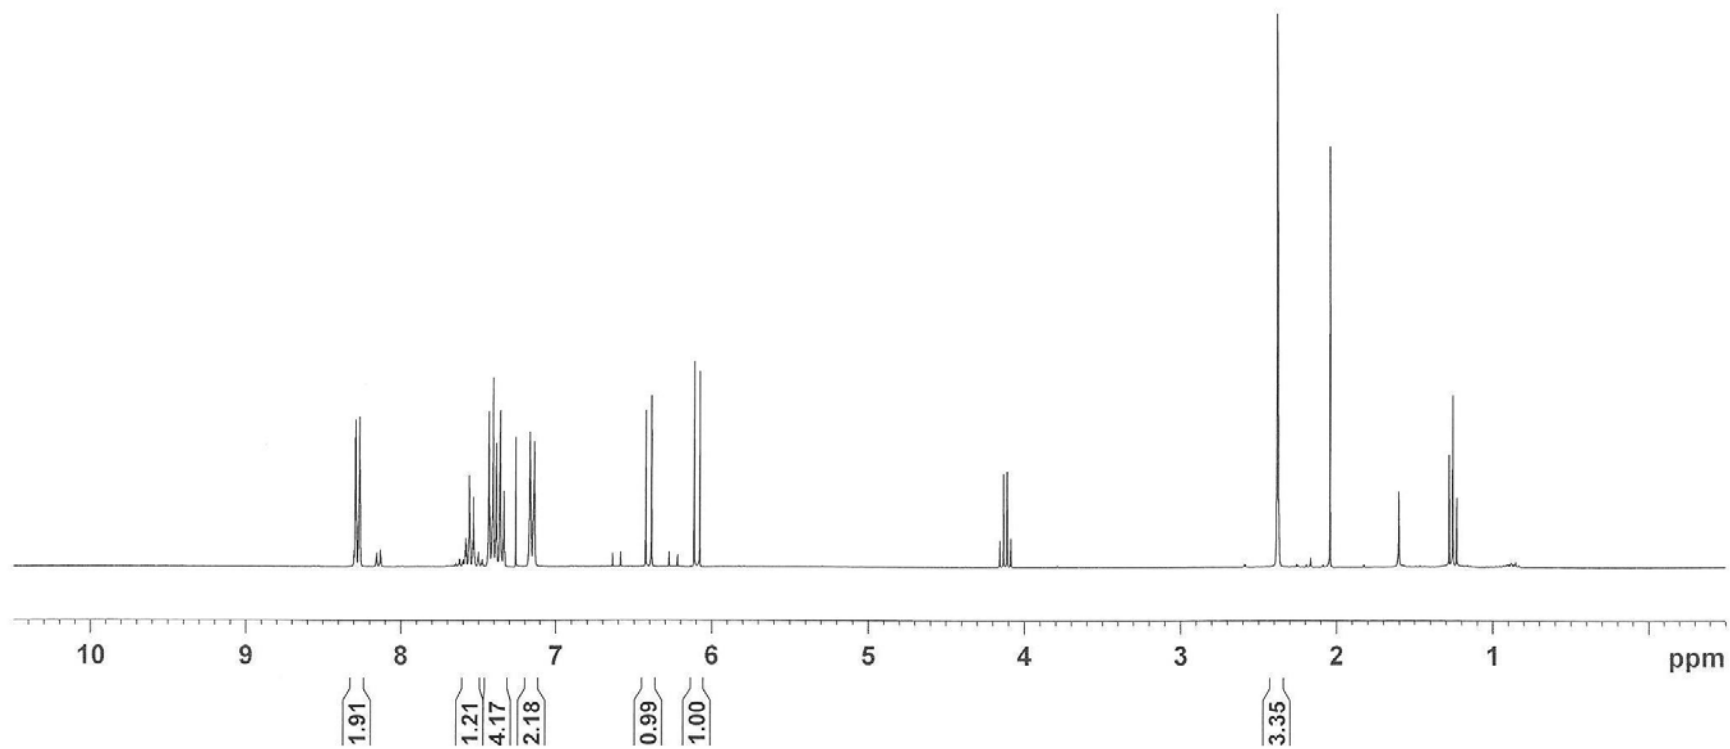

WHC-034-2

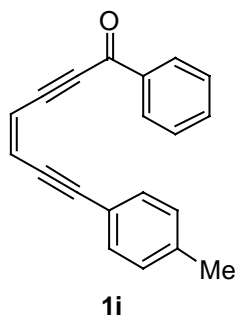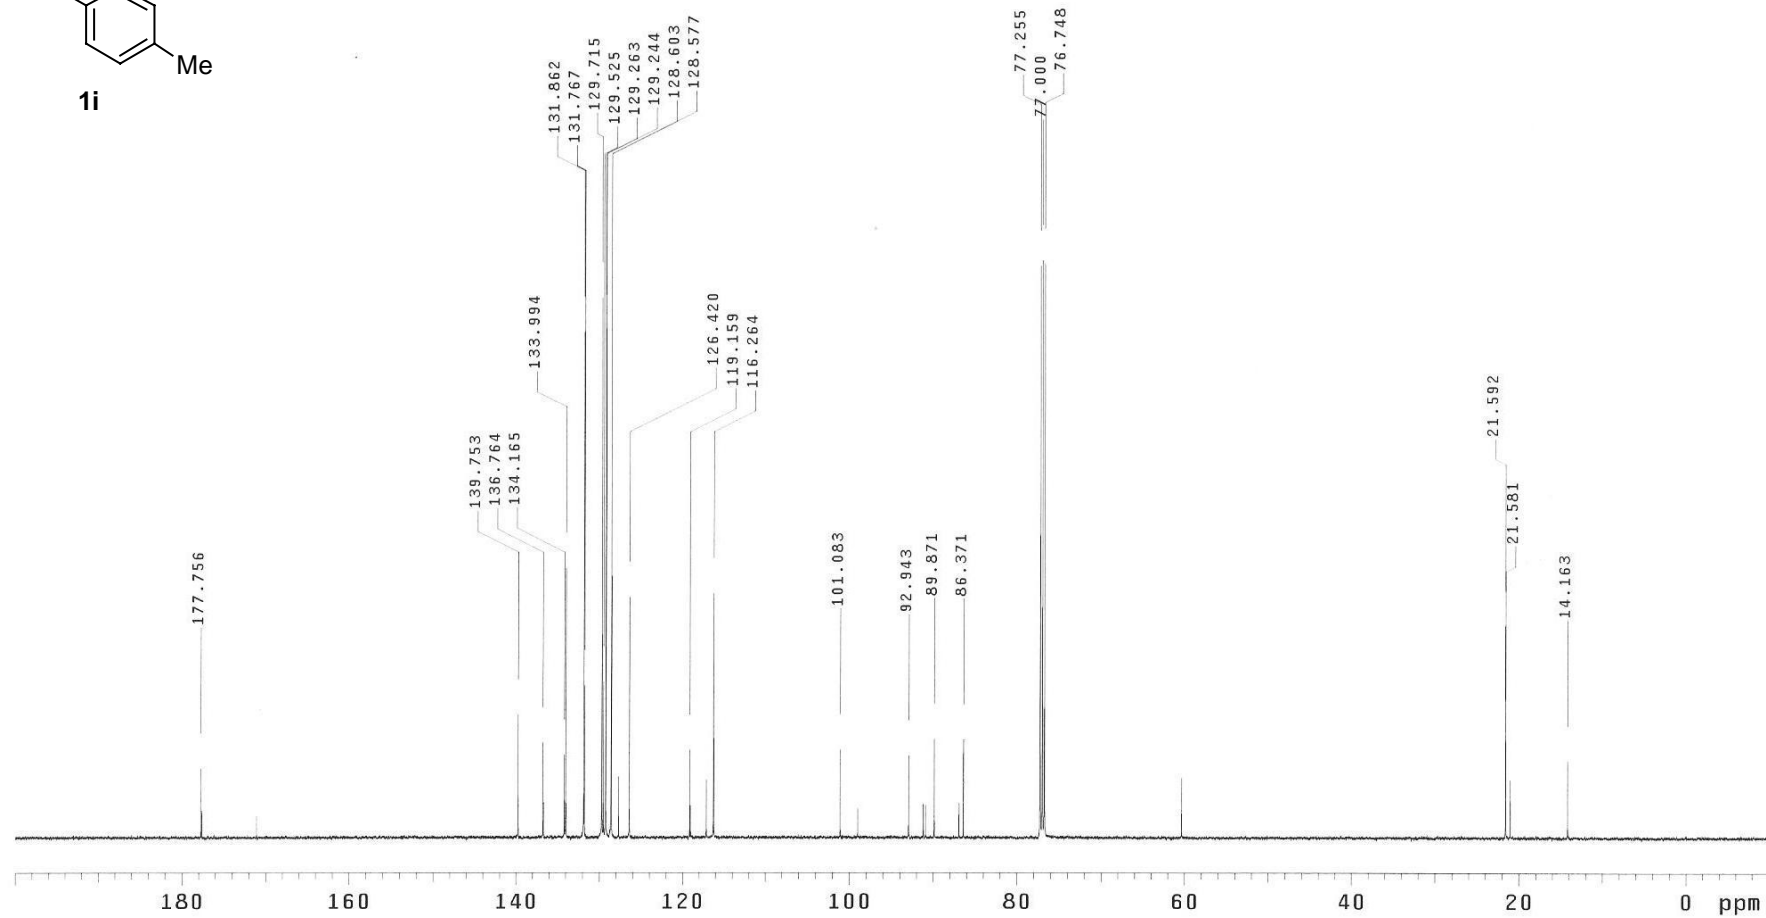



WHJ-213

Solvent: CDC13  
Ambient temperature  
GEMINI-200 "oxford200"

Pulse 44.0 degrees  
Acq. time 3.002 sec  
Width 3000.3 Hz  
40 repetitions  
OBSERVE H1, 199.9678378 MHz  
DATA PROCESSING  
FT size 32768  
Total time 2 hr, 50 min, 36 sec

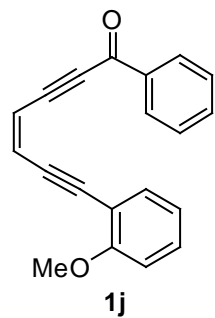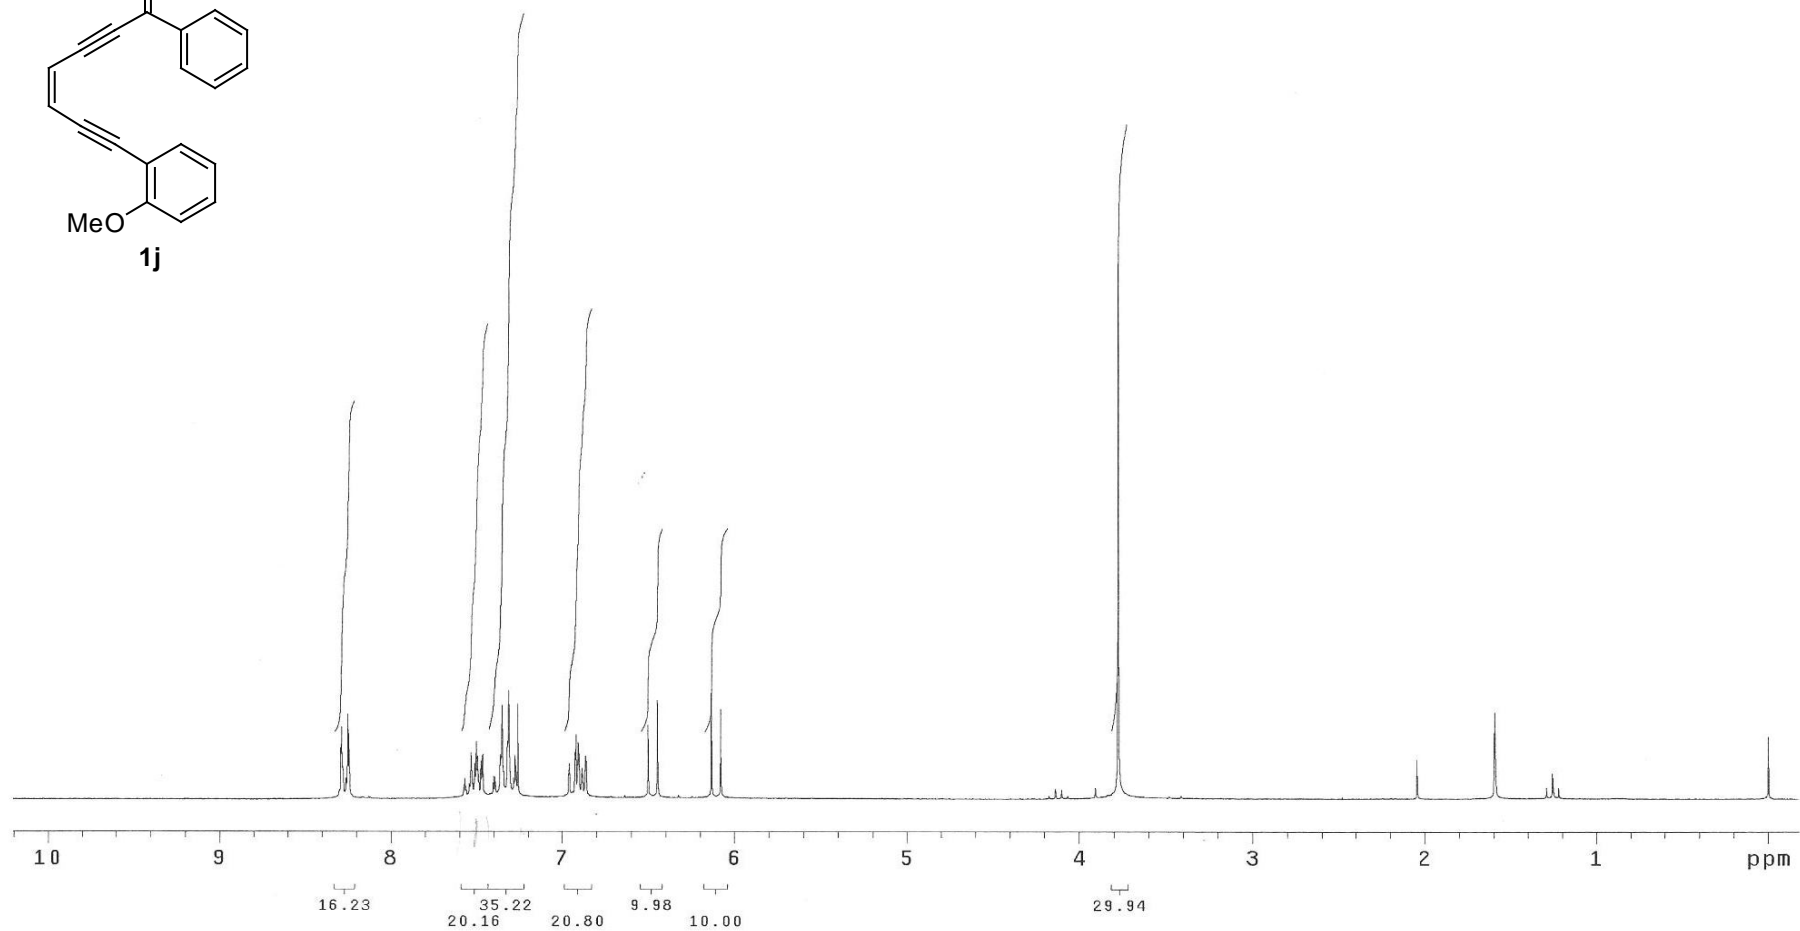

WHJ-213

Mercury-400BB "Mercuryplus400"  
Date: Mar 27 2008  
Solvent: CDCl3  
Ambient temperature  
Total 7104 repetitions

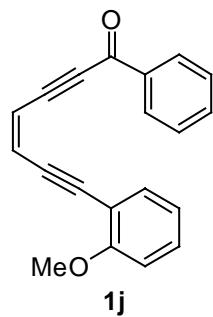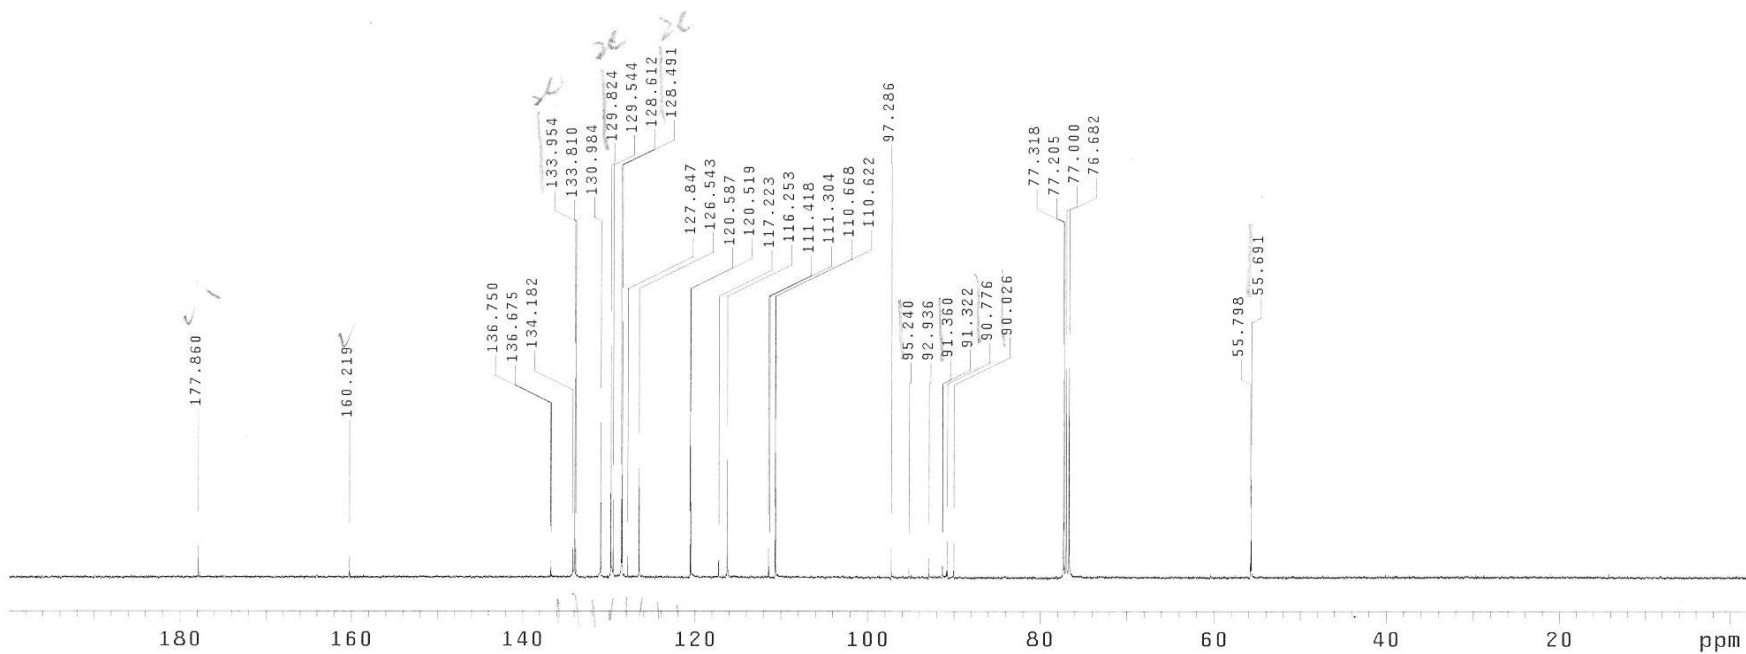

WHC-040

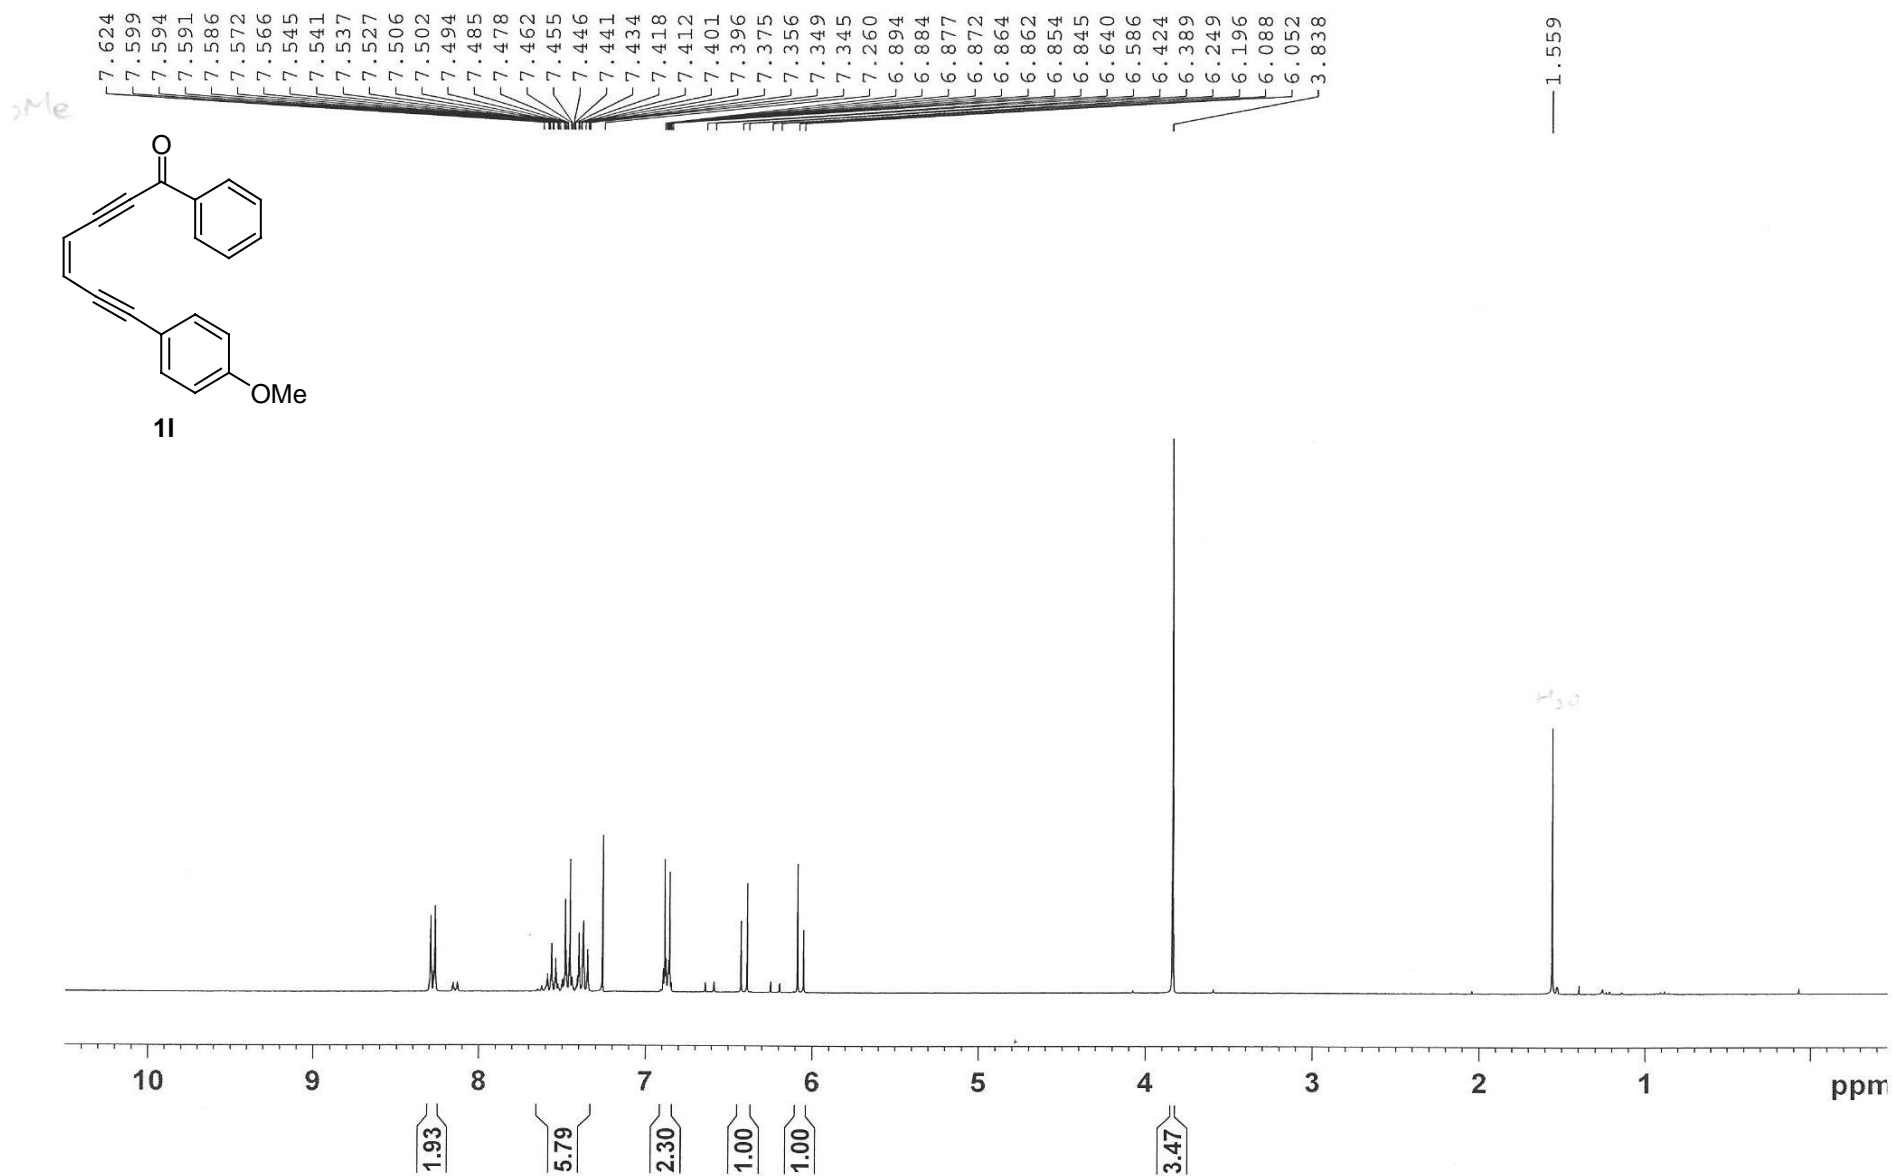

WHC-040

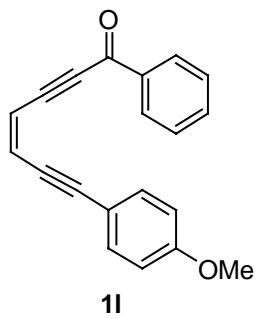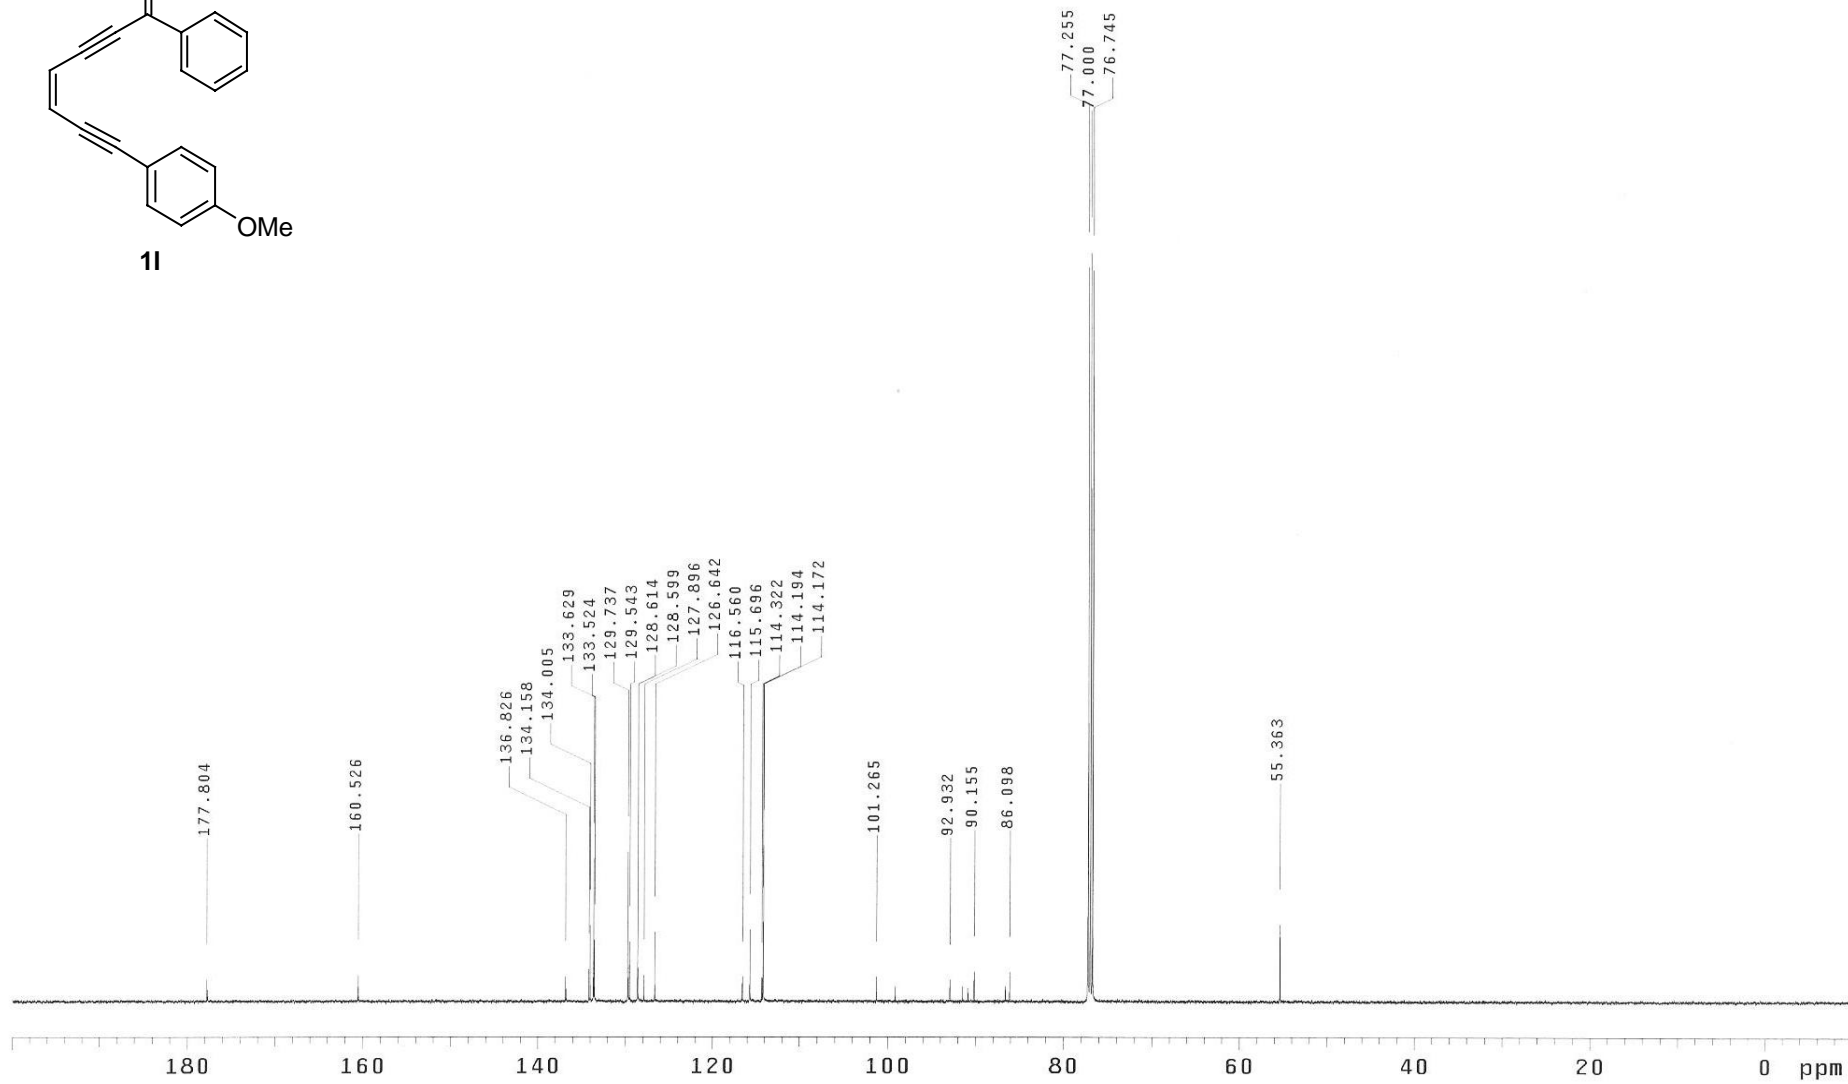

WHC-096-solid

8.241  
8.218  
8.213  
8.189  
7.674  
7.668  
7.651  
7.645  
7.638  
7.631  
7.628  
7.603  
7.582  
7.578  
7.432  
7.406  
7.381  
7.260  
6.443  
6.407  
6.257  
6.220

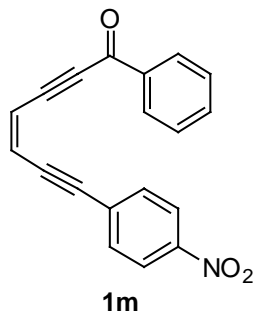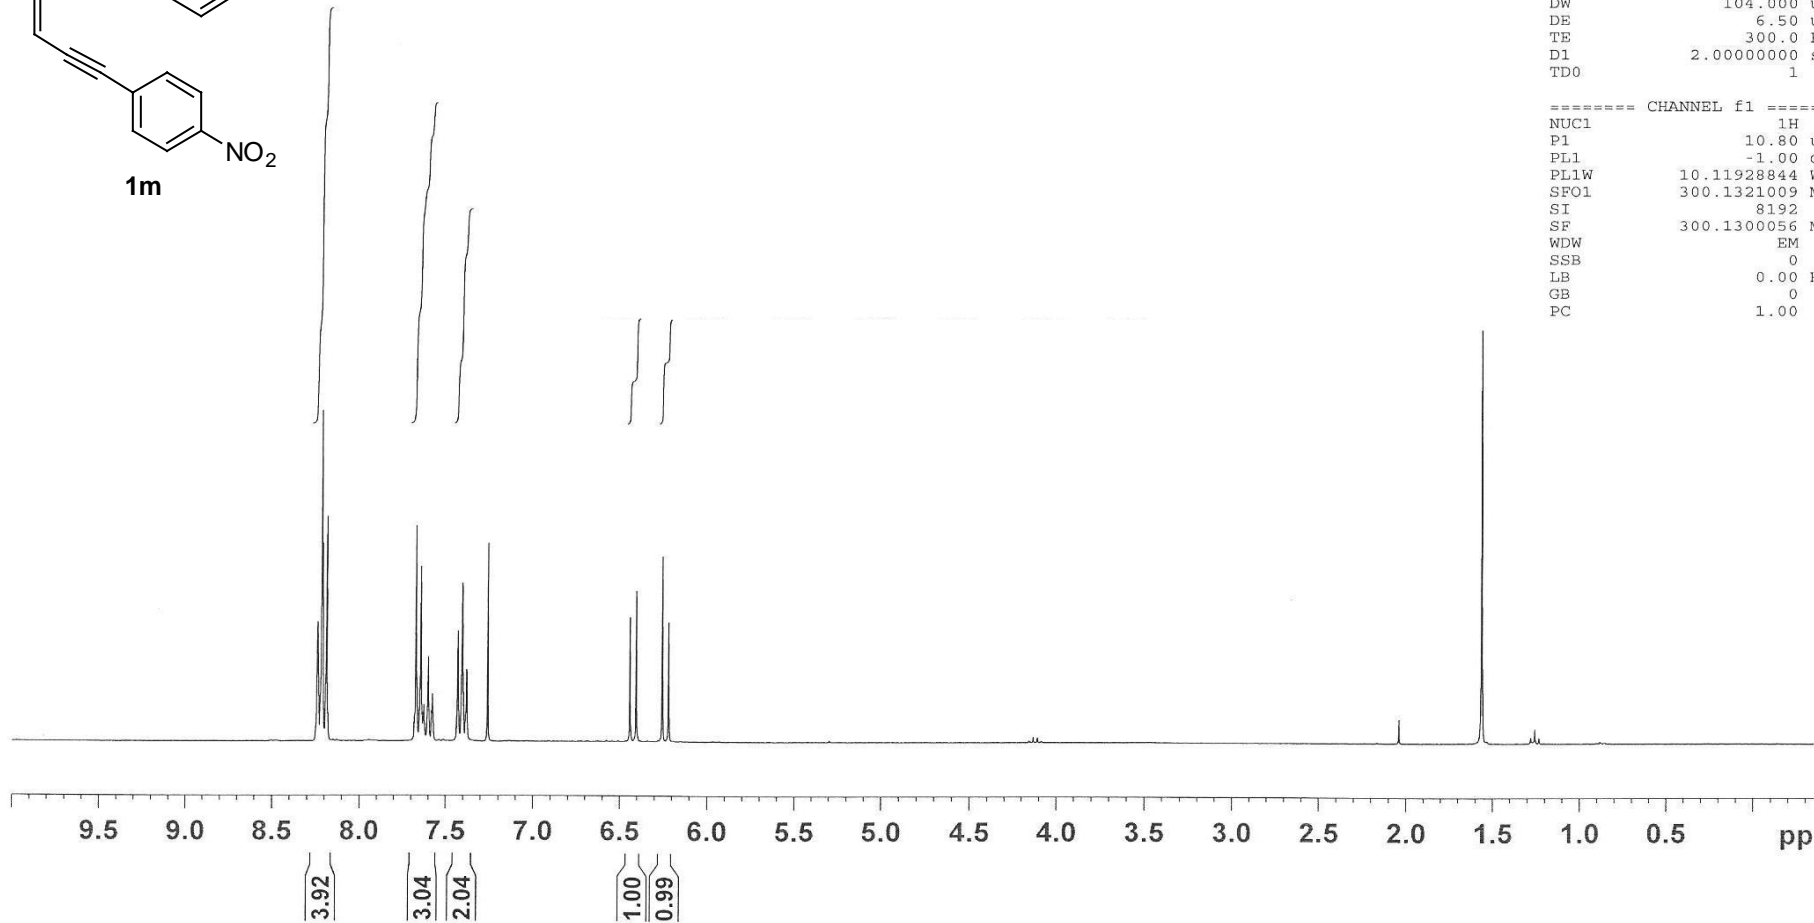

NAME WHC-096-solid-2  
EXPNO 1  
PROCNO 1  
Date\_ 20091119  
Time 10.45  
INSTRUM spect  
PROBHD 5 mm PABBO BB-  
PULPROG zg30  
TD 16384  
SOLVENT CDCl3  
NS 64  
DS 0  
SWH 4807.692 F  
FIDRES 0.293438 F  
AQ 1.7039860 S  
RG 203  
DW 104.000 U  
DE 6.50 U  
TE 300.0 F  
D1 2.00000000 S  
TD0 1

==== CHANNEL f1 =====  
NUC1 1H  
P1 10.80 U  
PL1 -1.00 C  
PL1W 10.11928844 W  
SFO1 300.1321009 M  
SI 8192  
SF 300.1300056 M  
WDW EM  
SSB 0  
LB 0.00 F  
GB 0  
PC 1.00

WHC-096

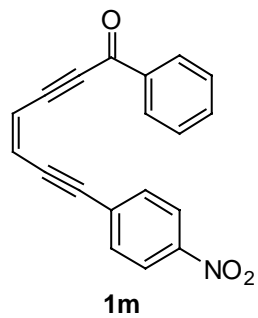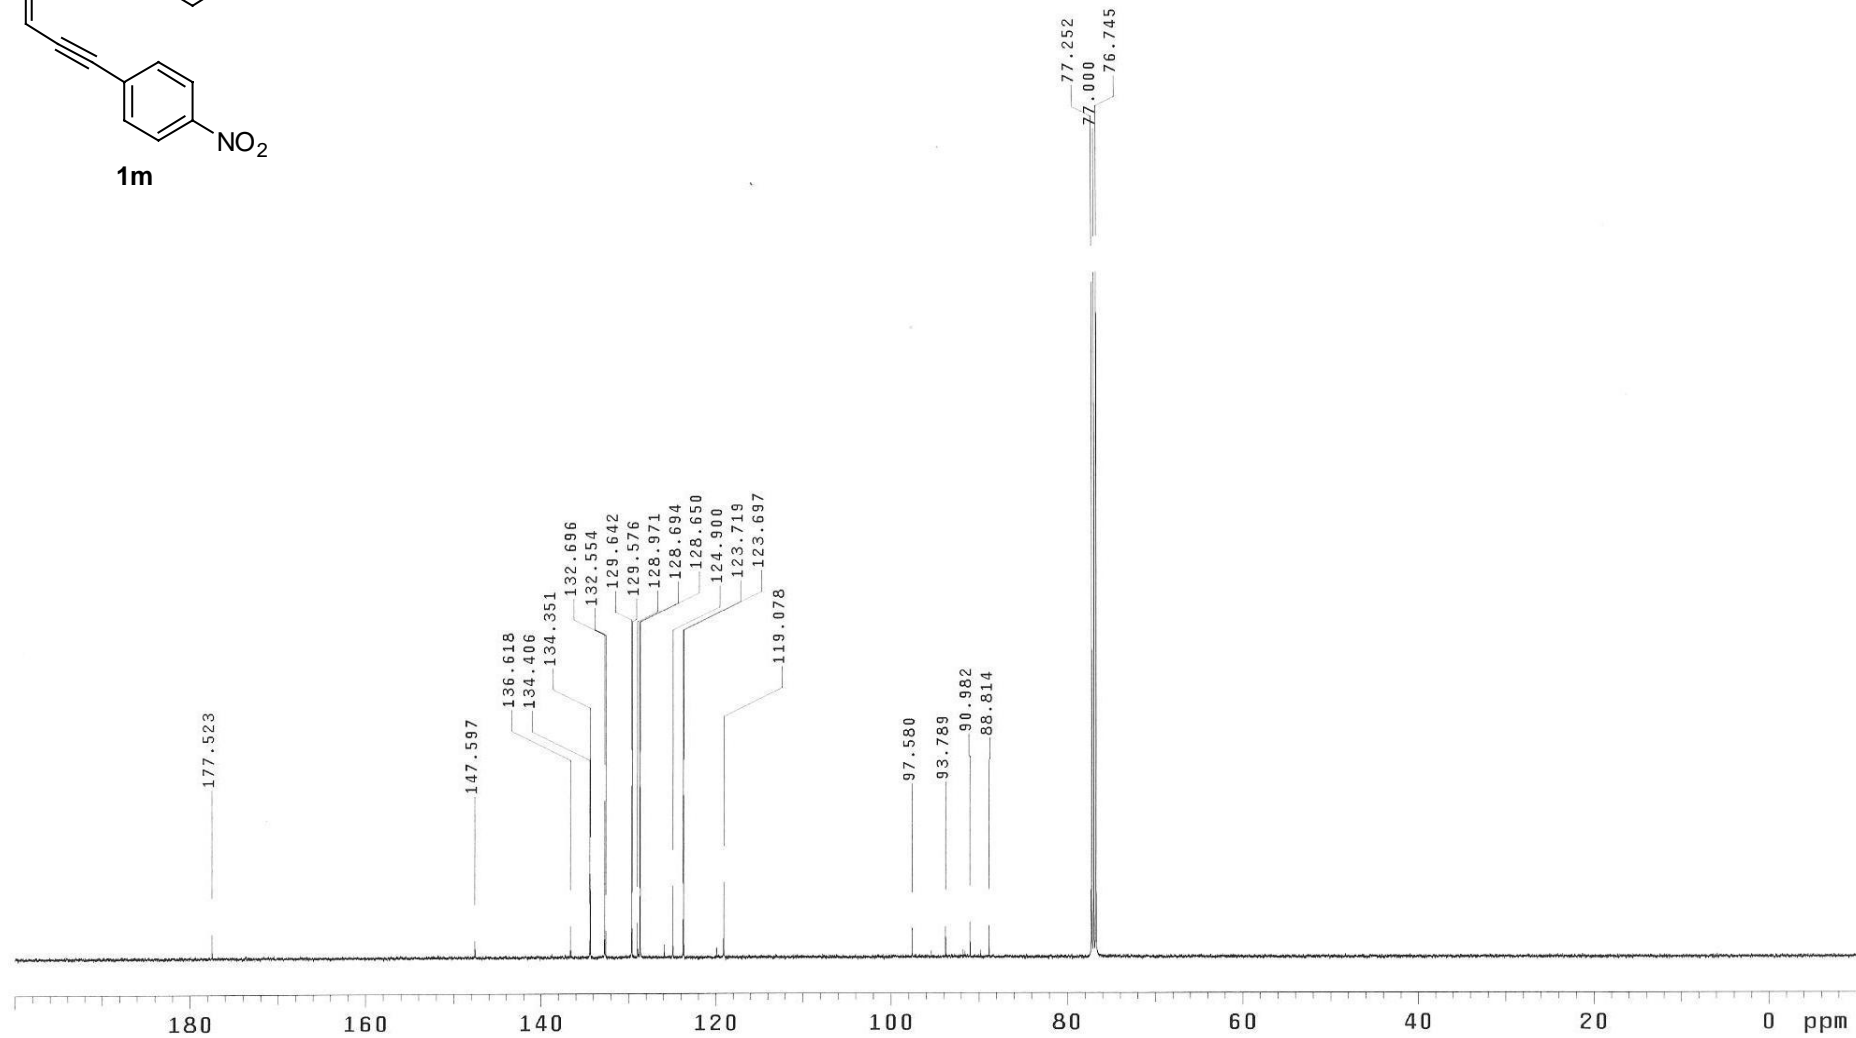

WHC-113

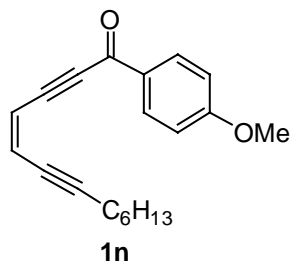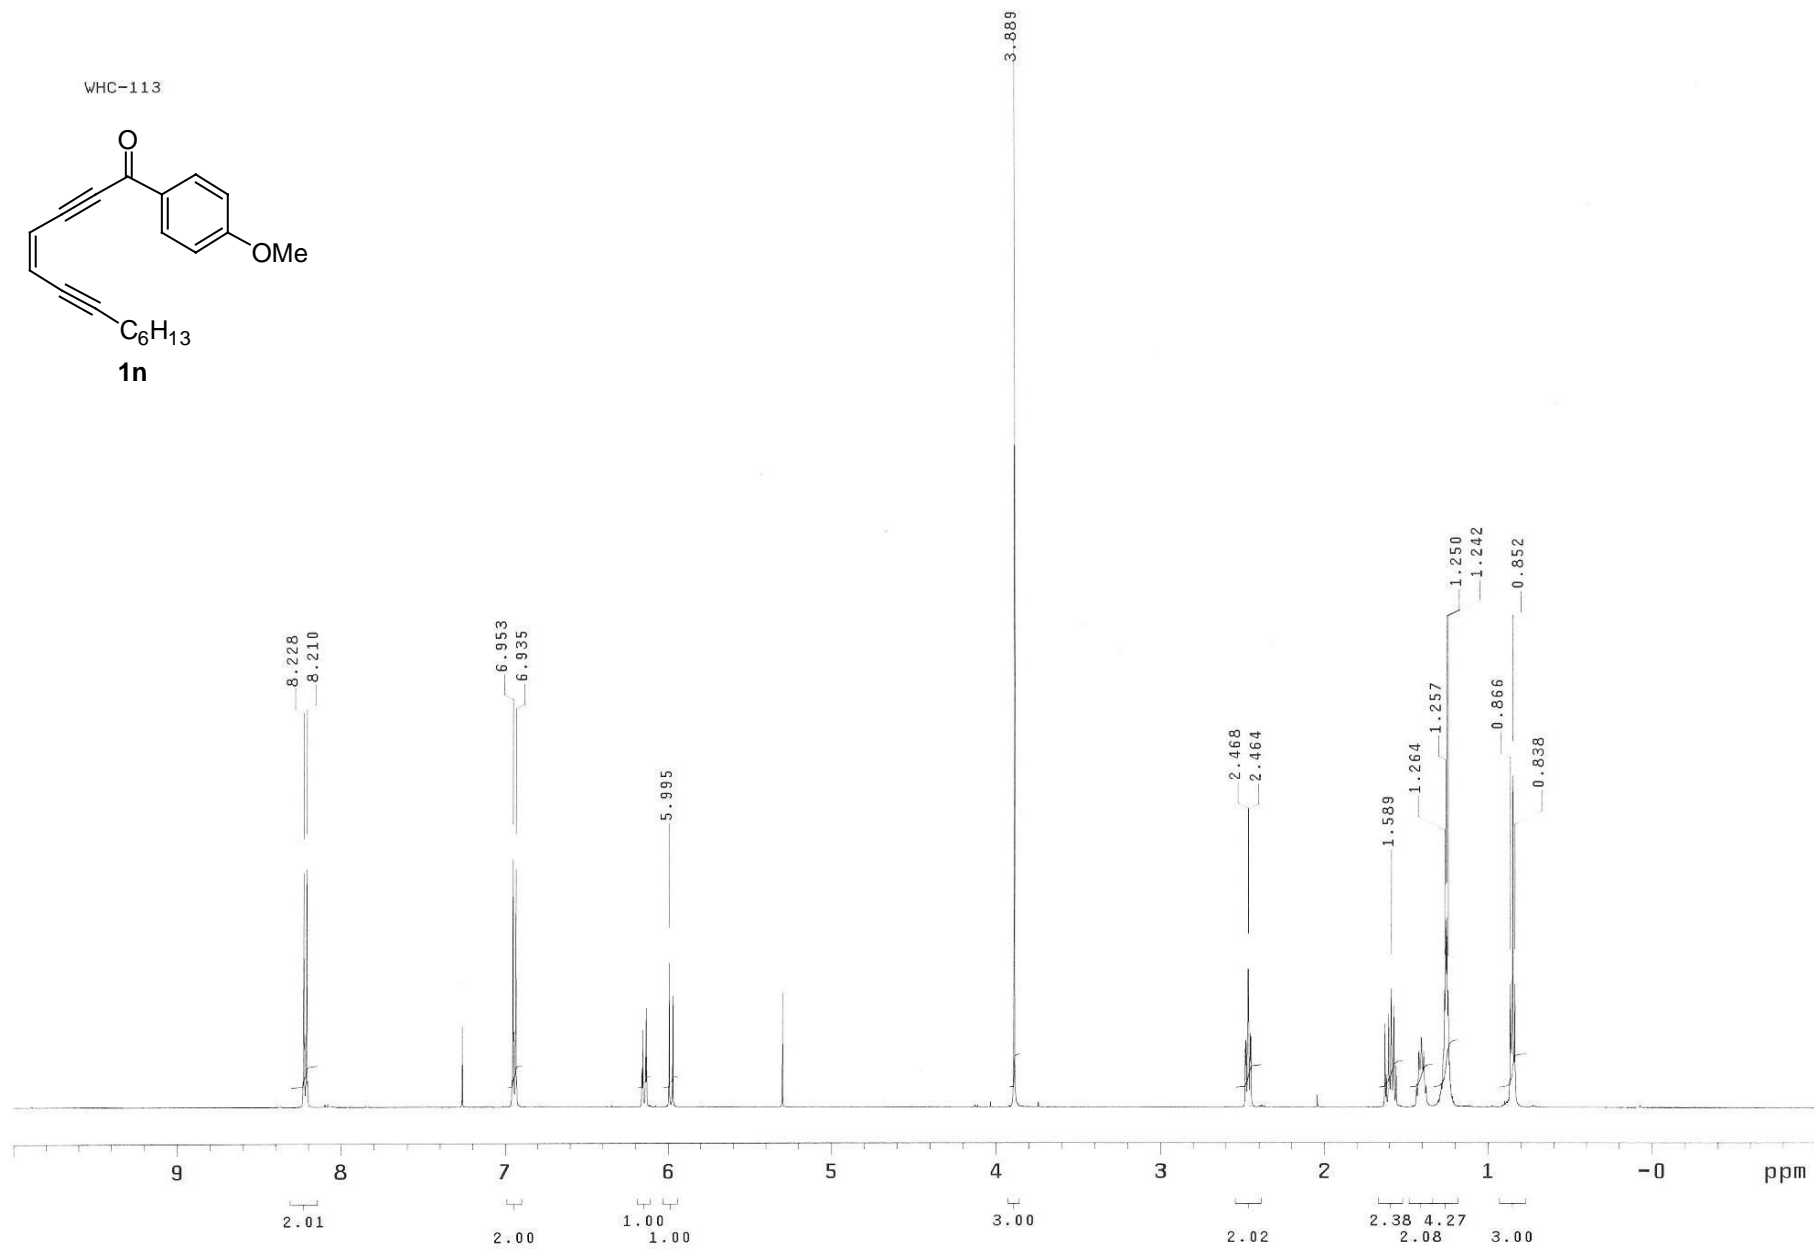

S-70

WHC-113

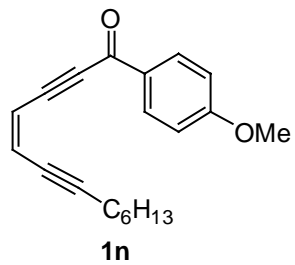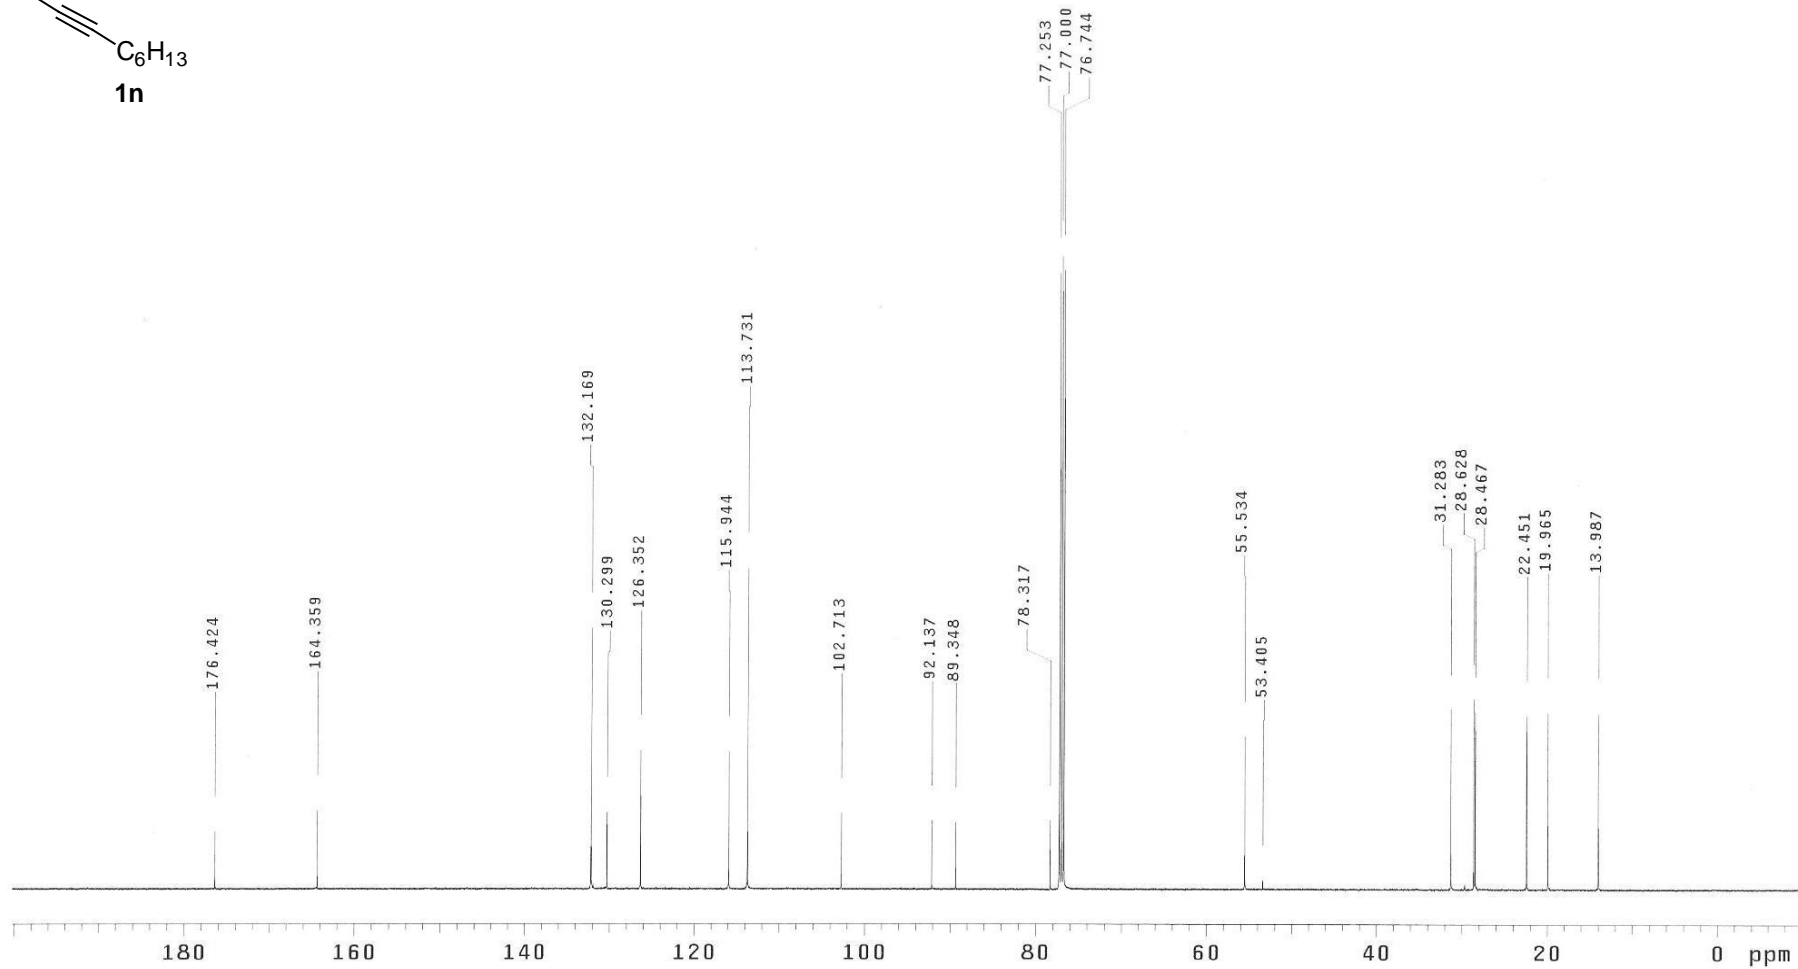



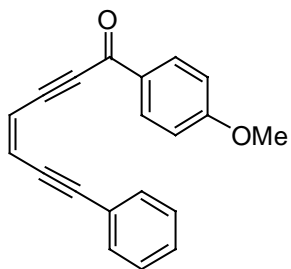

1o

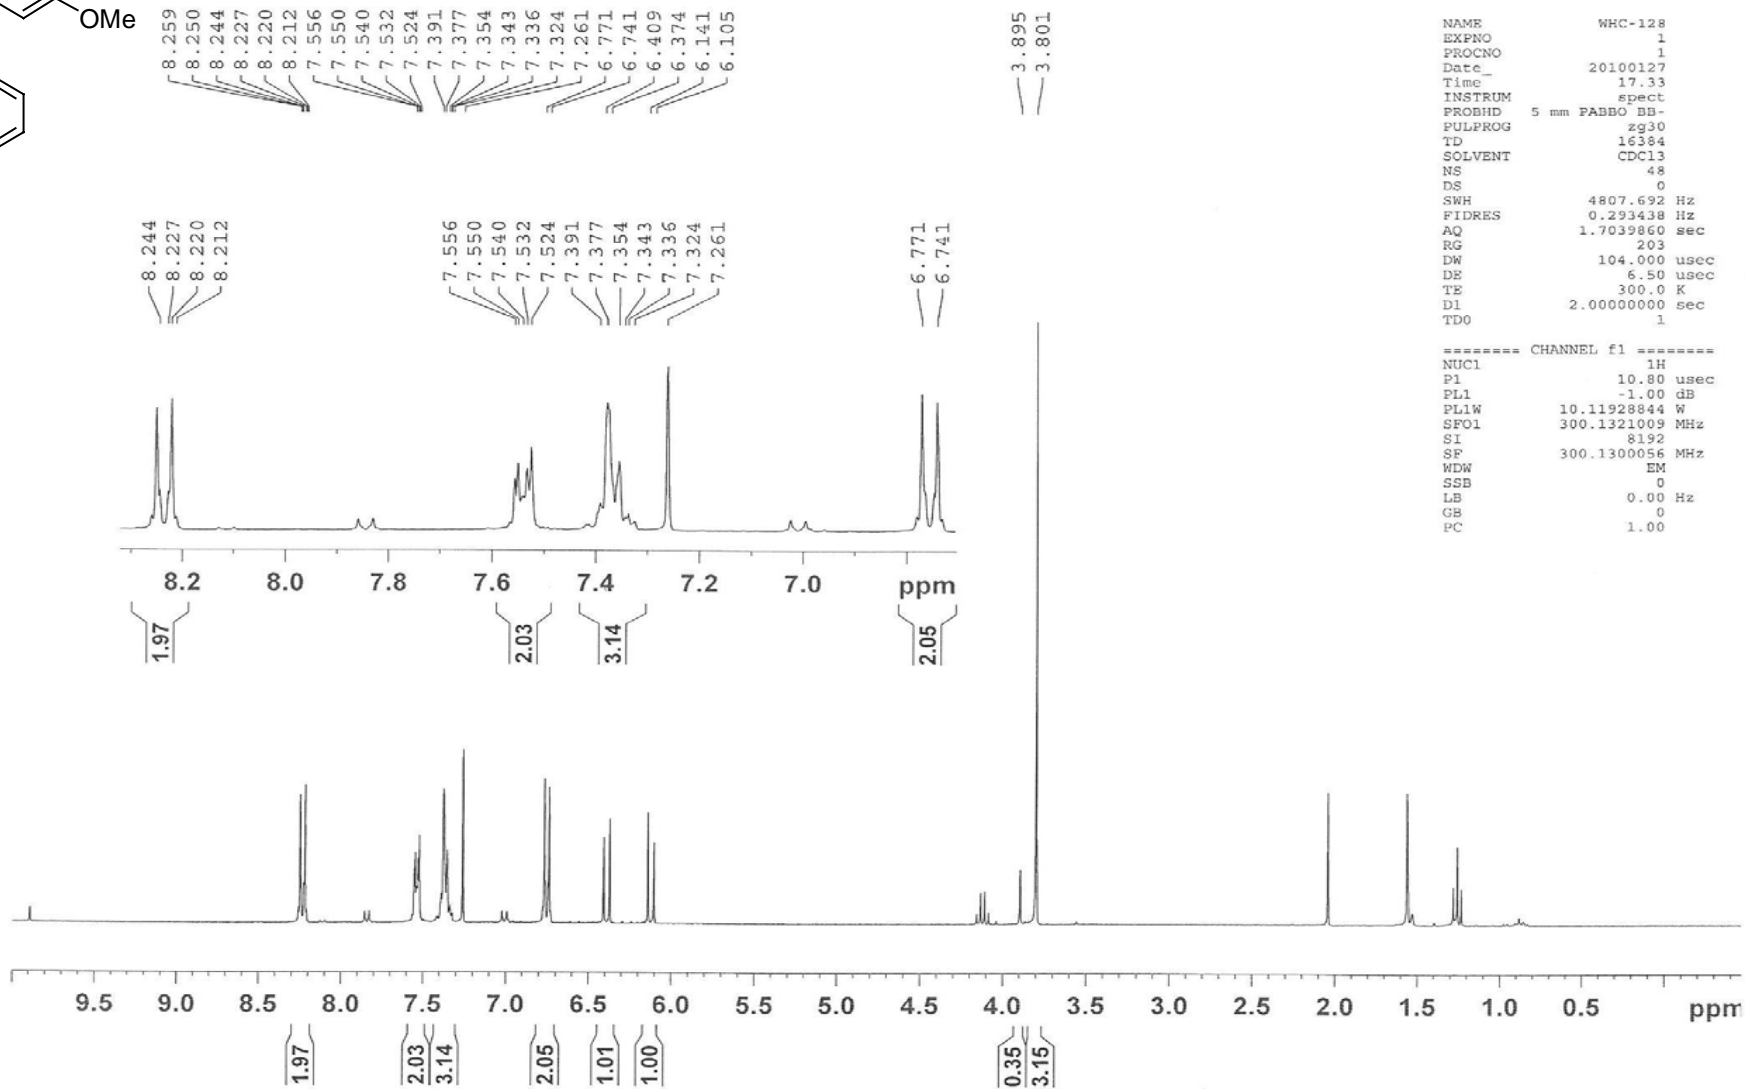

WHC-117

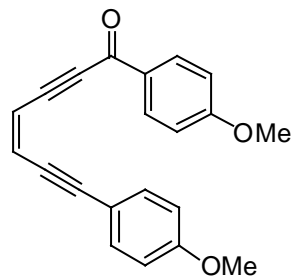

1p

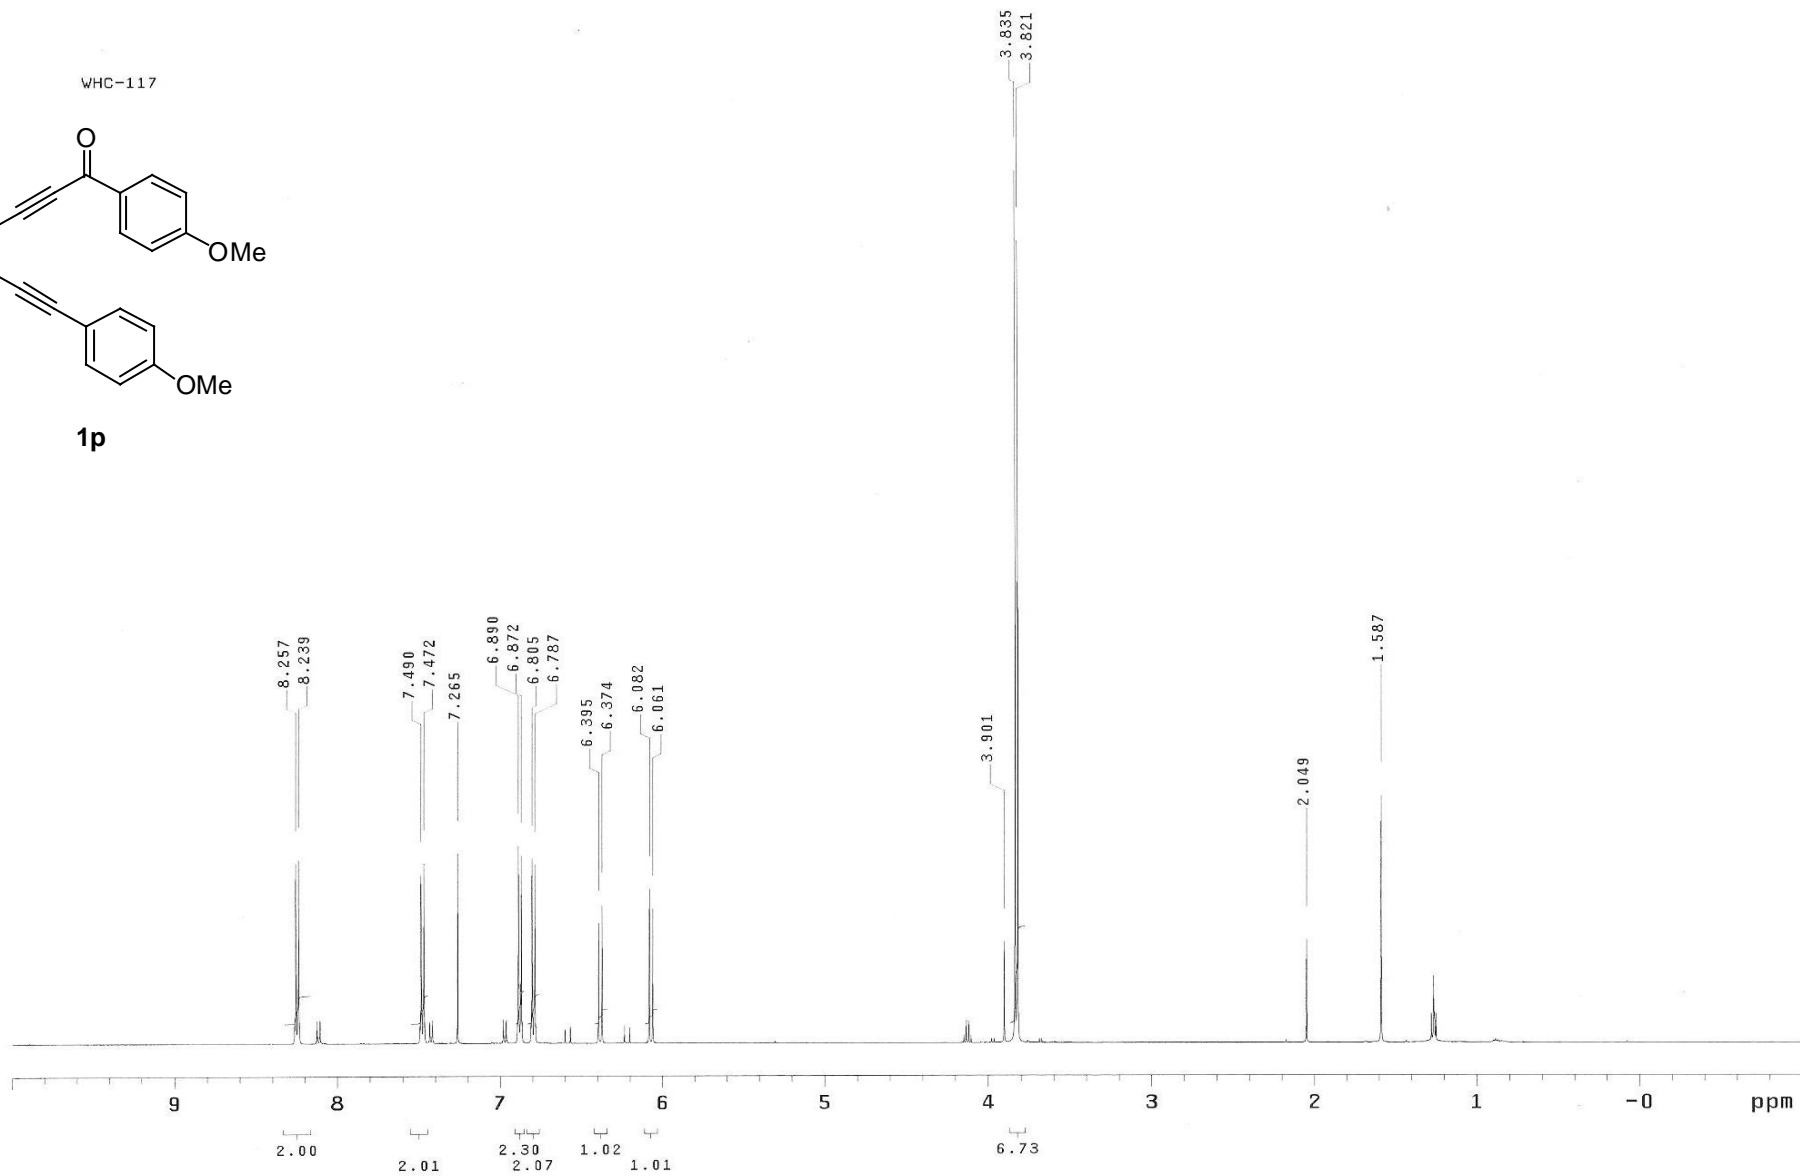

WHC-117

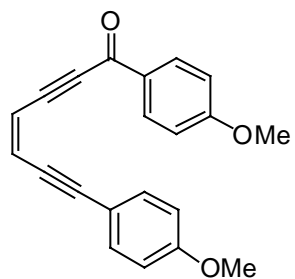

**1p**

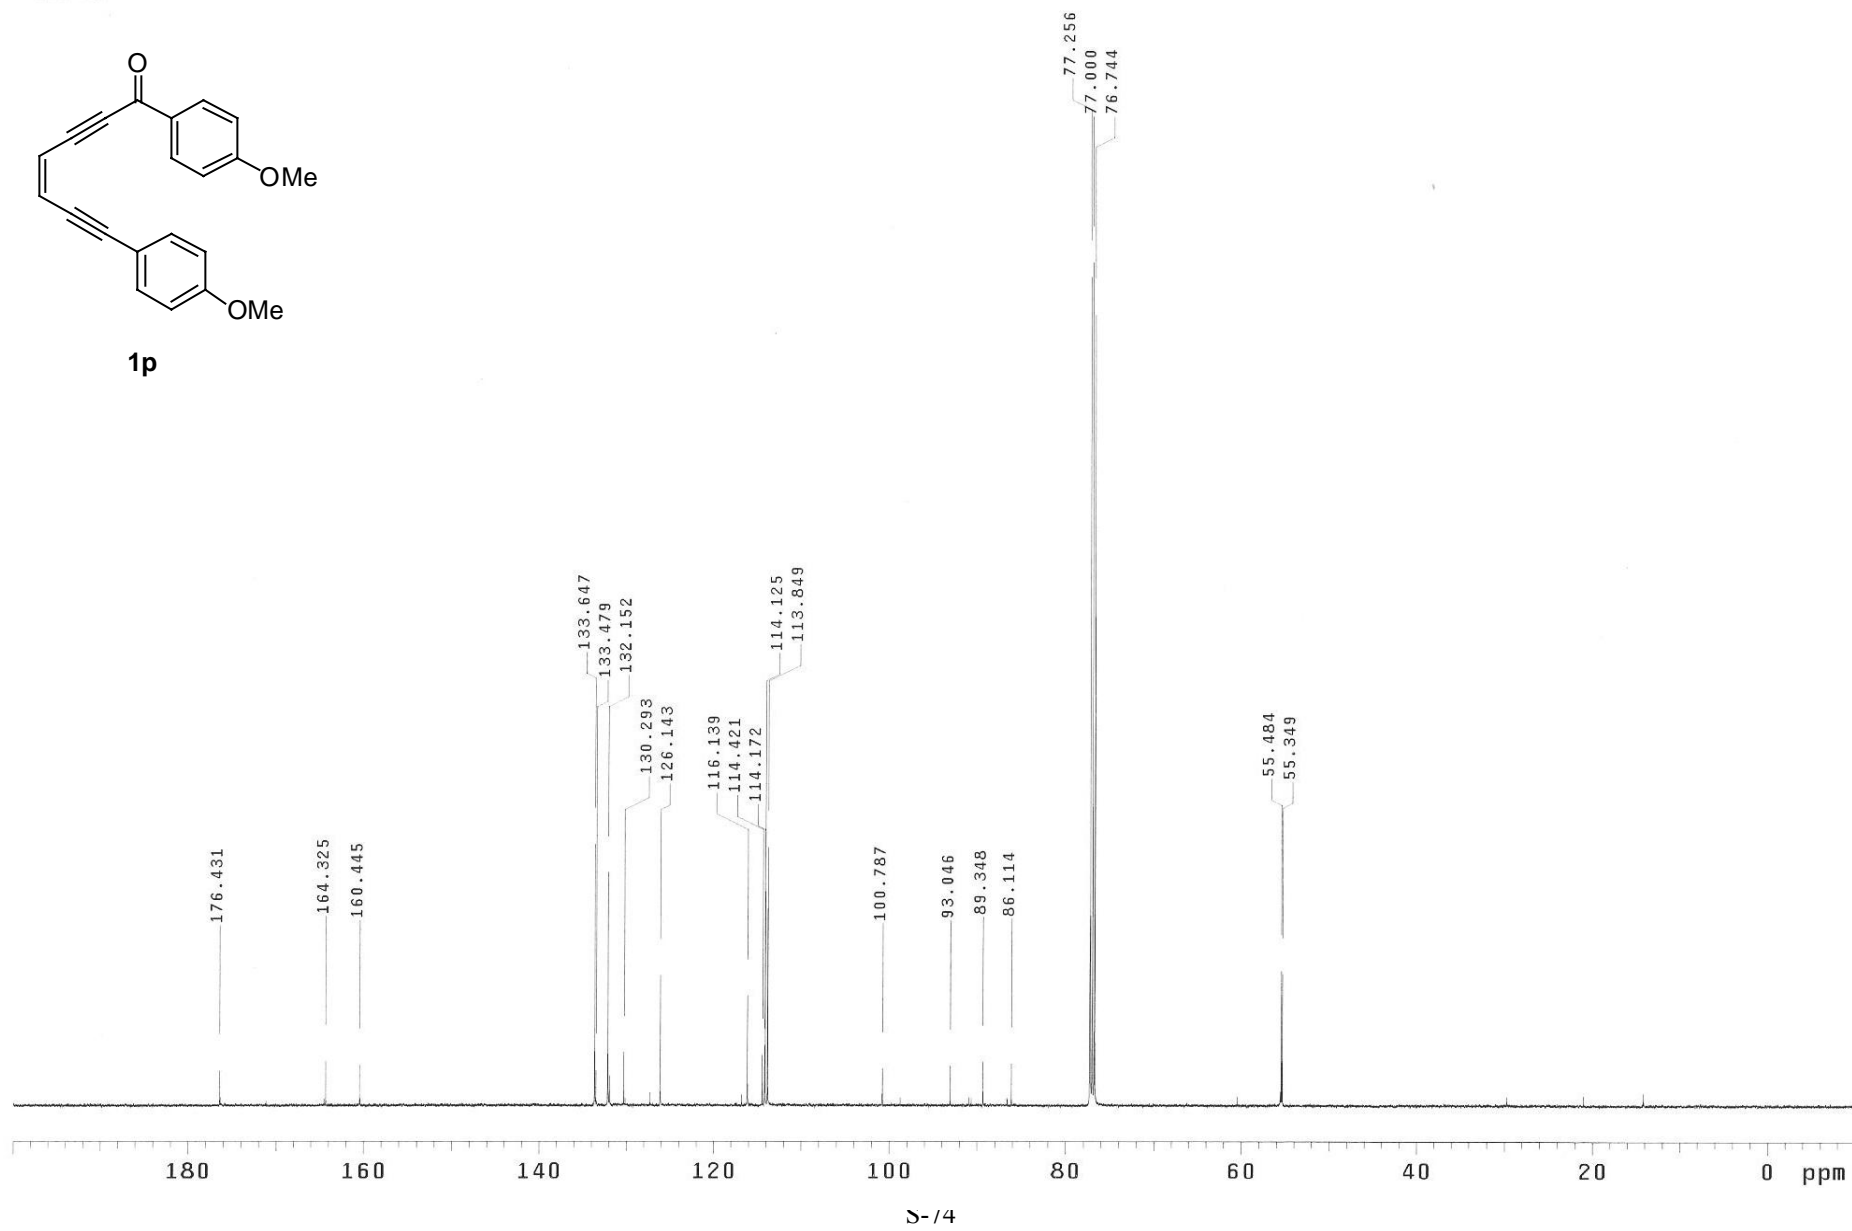

WHC-118

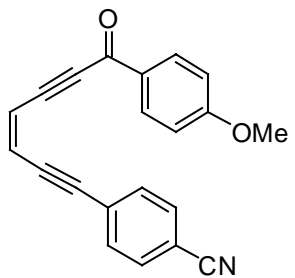

q

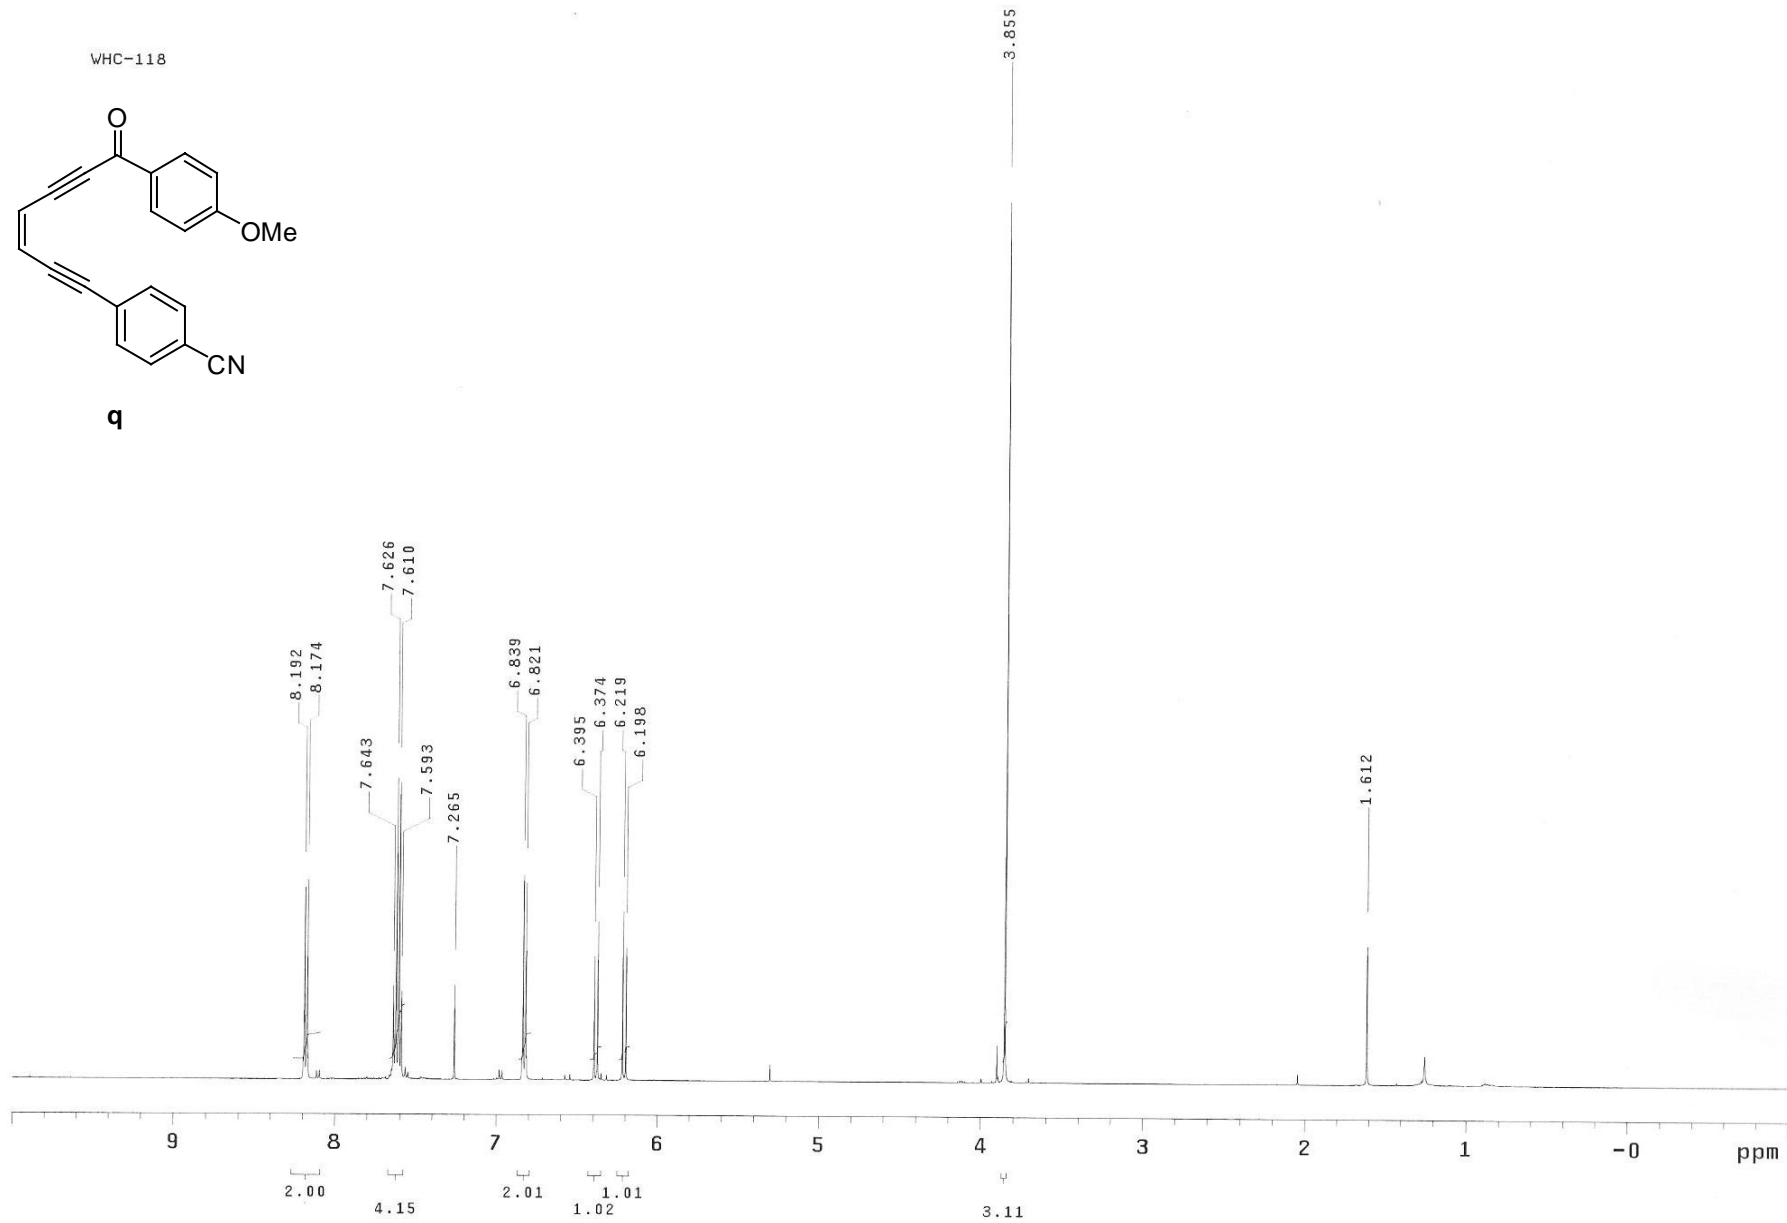

S-15

WHC-118

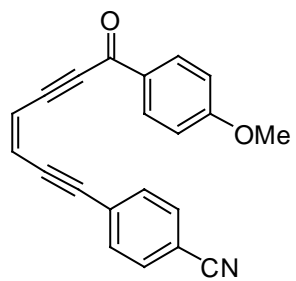

**q**

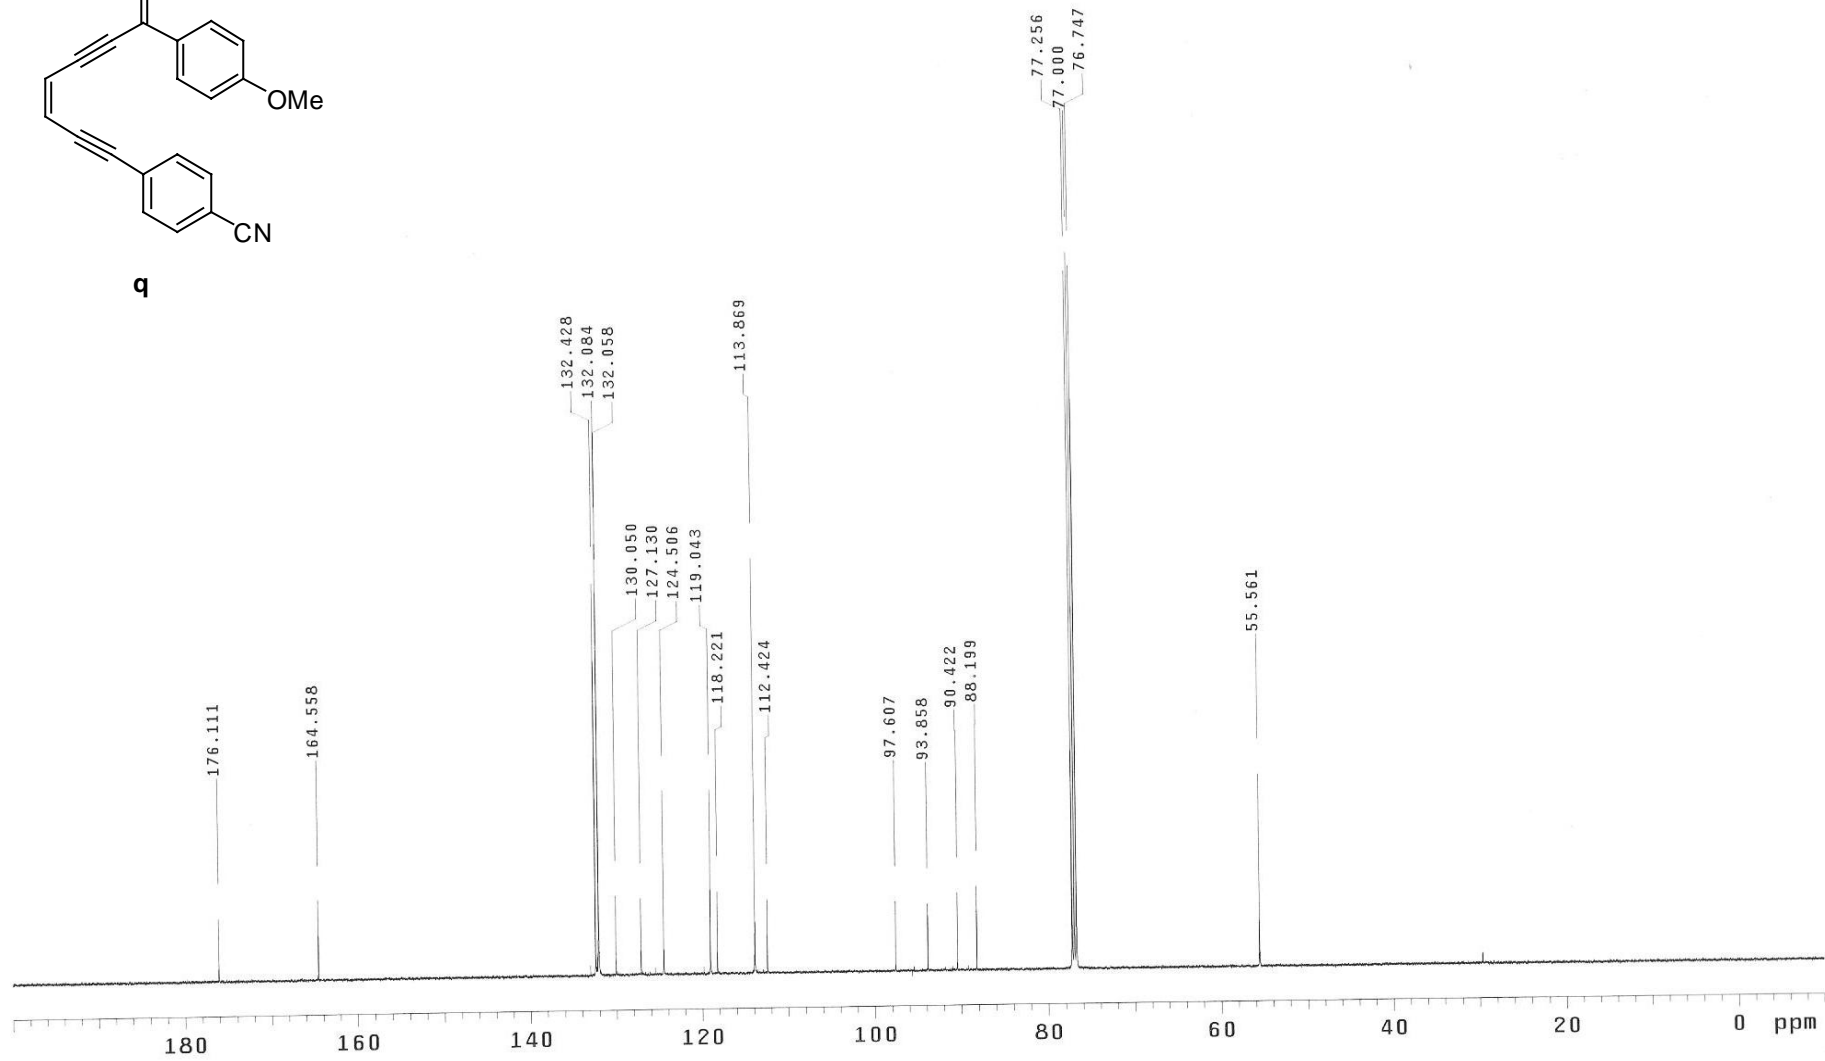

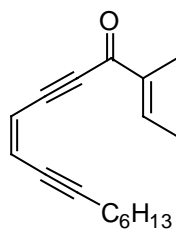

1r

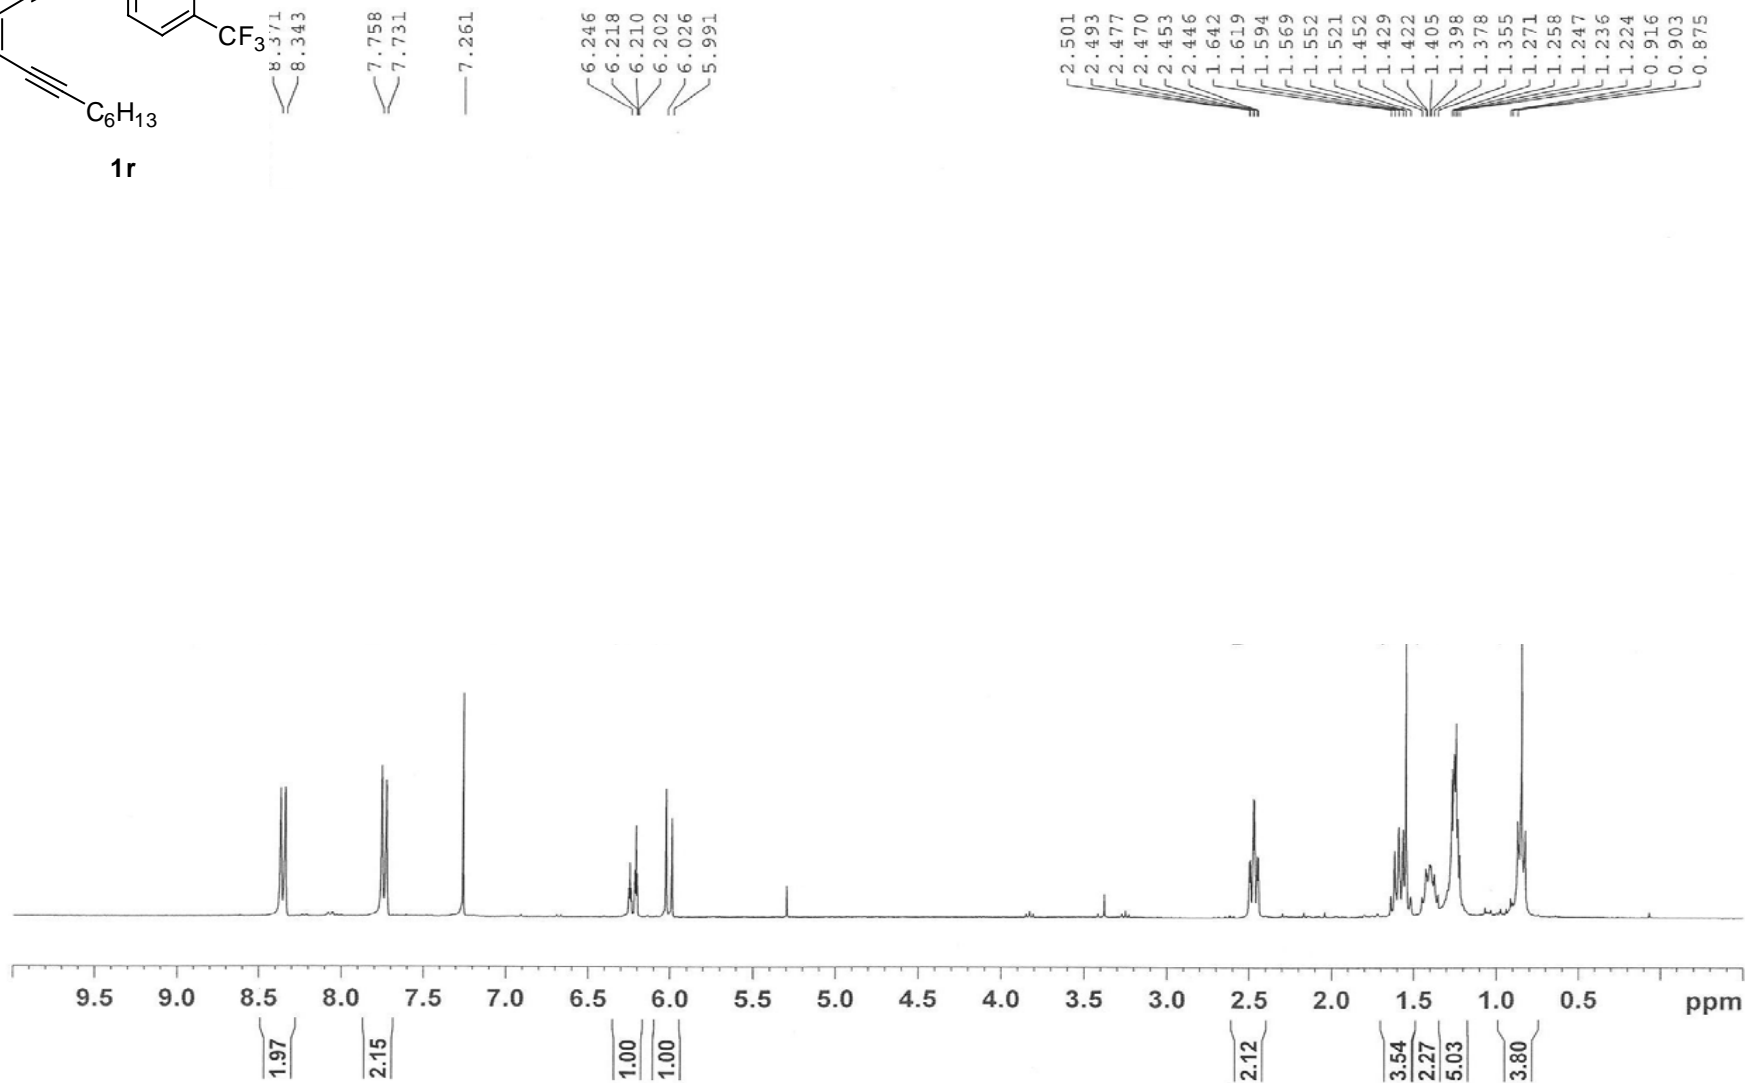

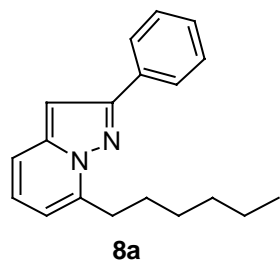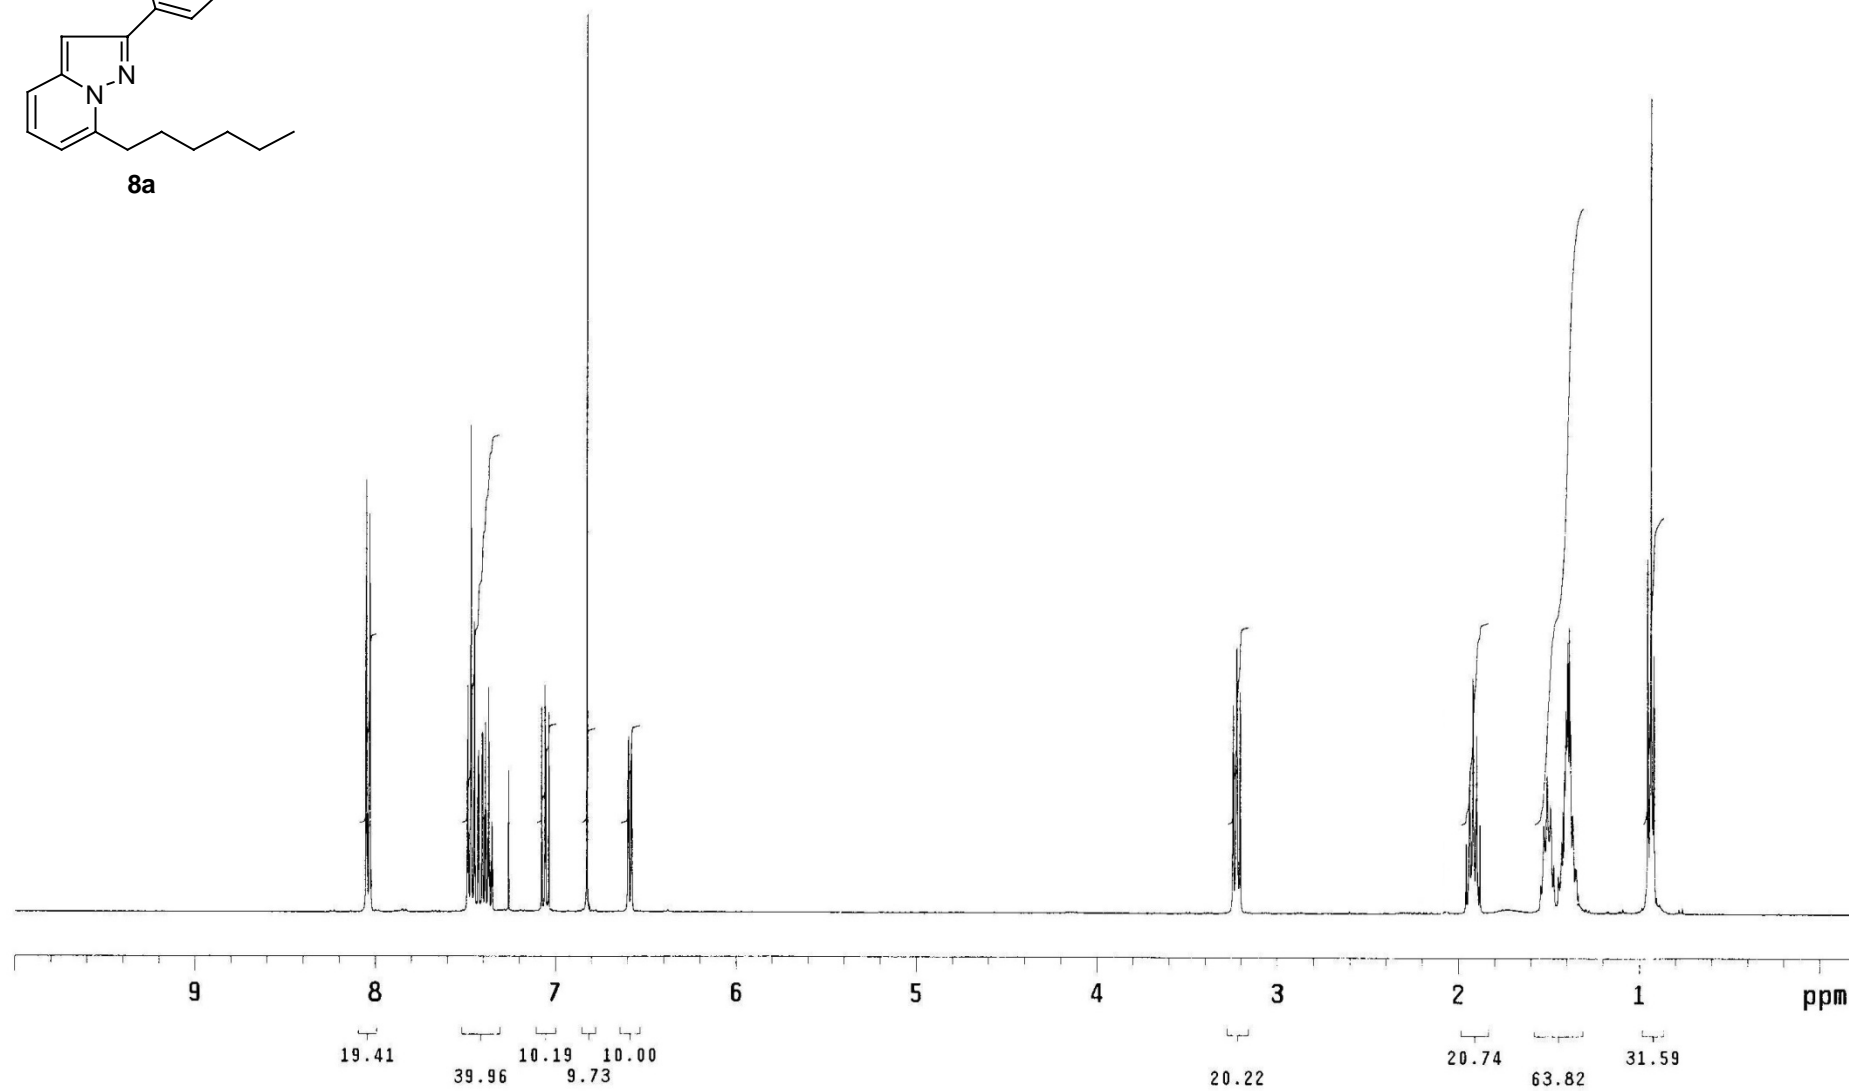

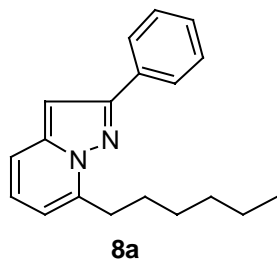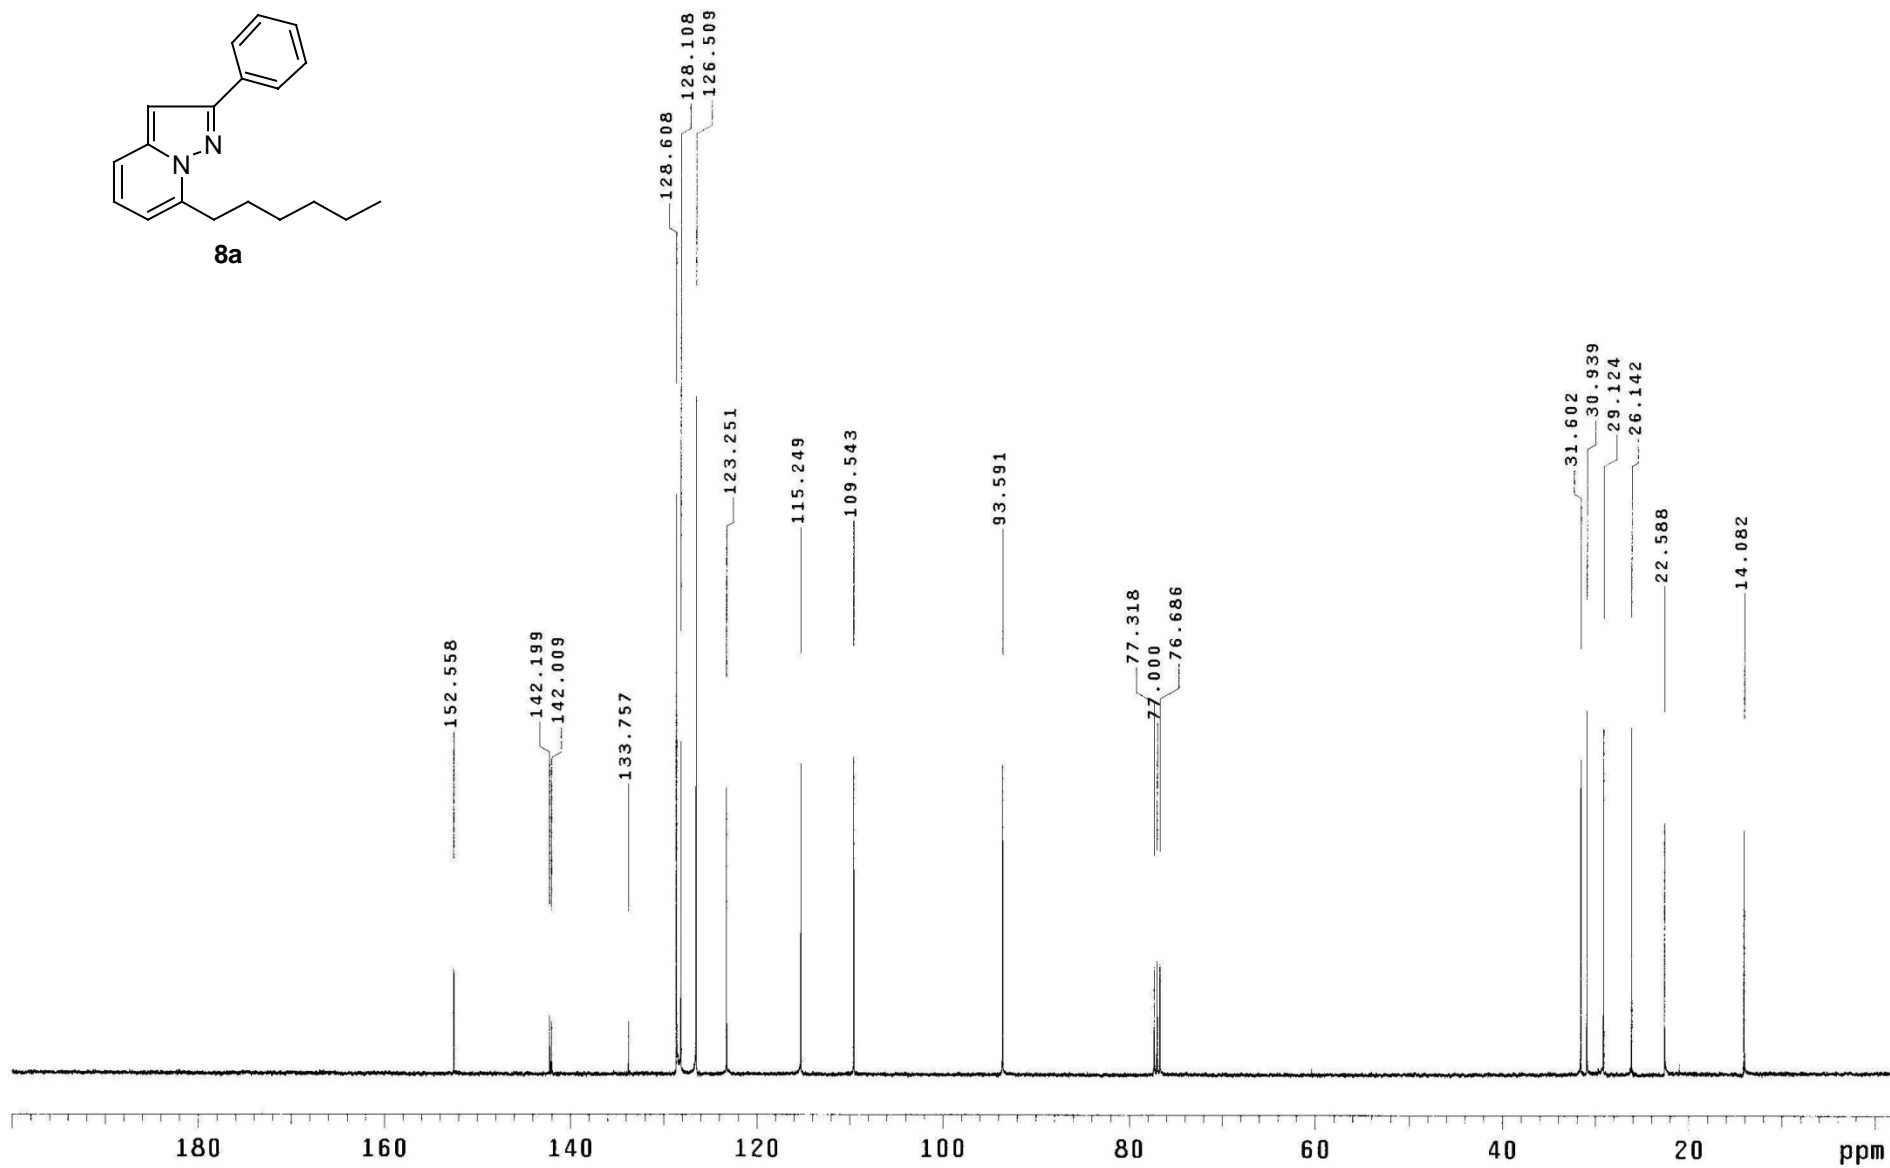



WHC-066-2-T2

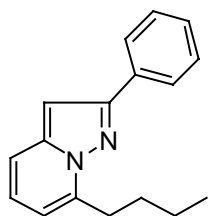

8b

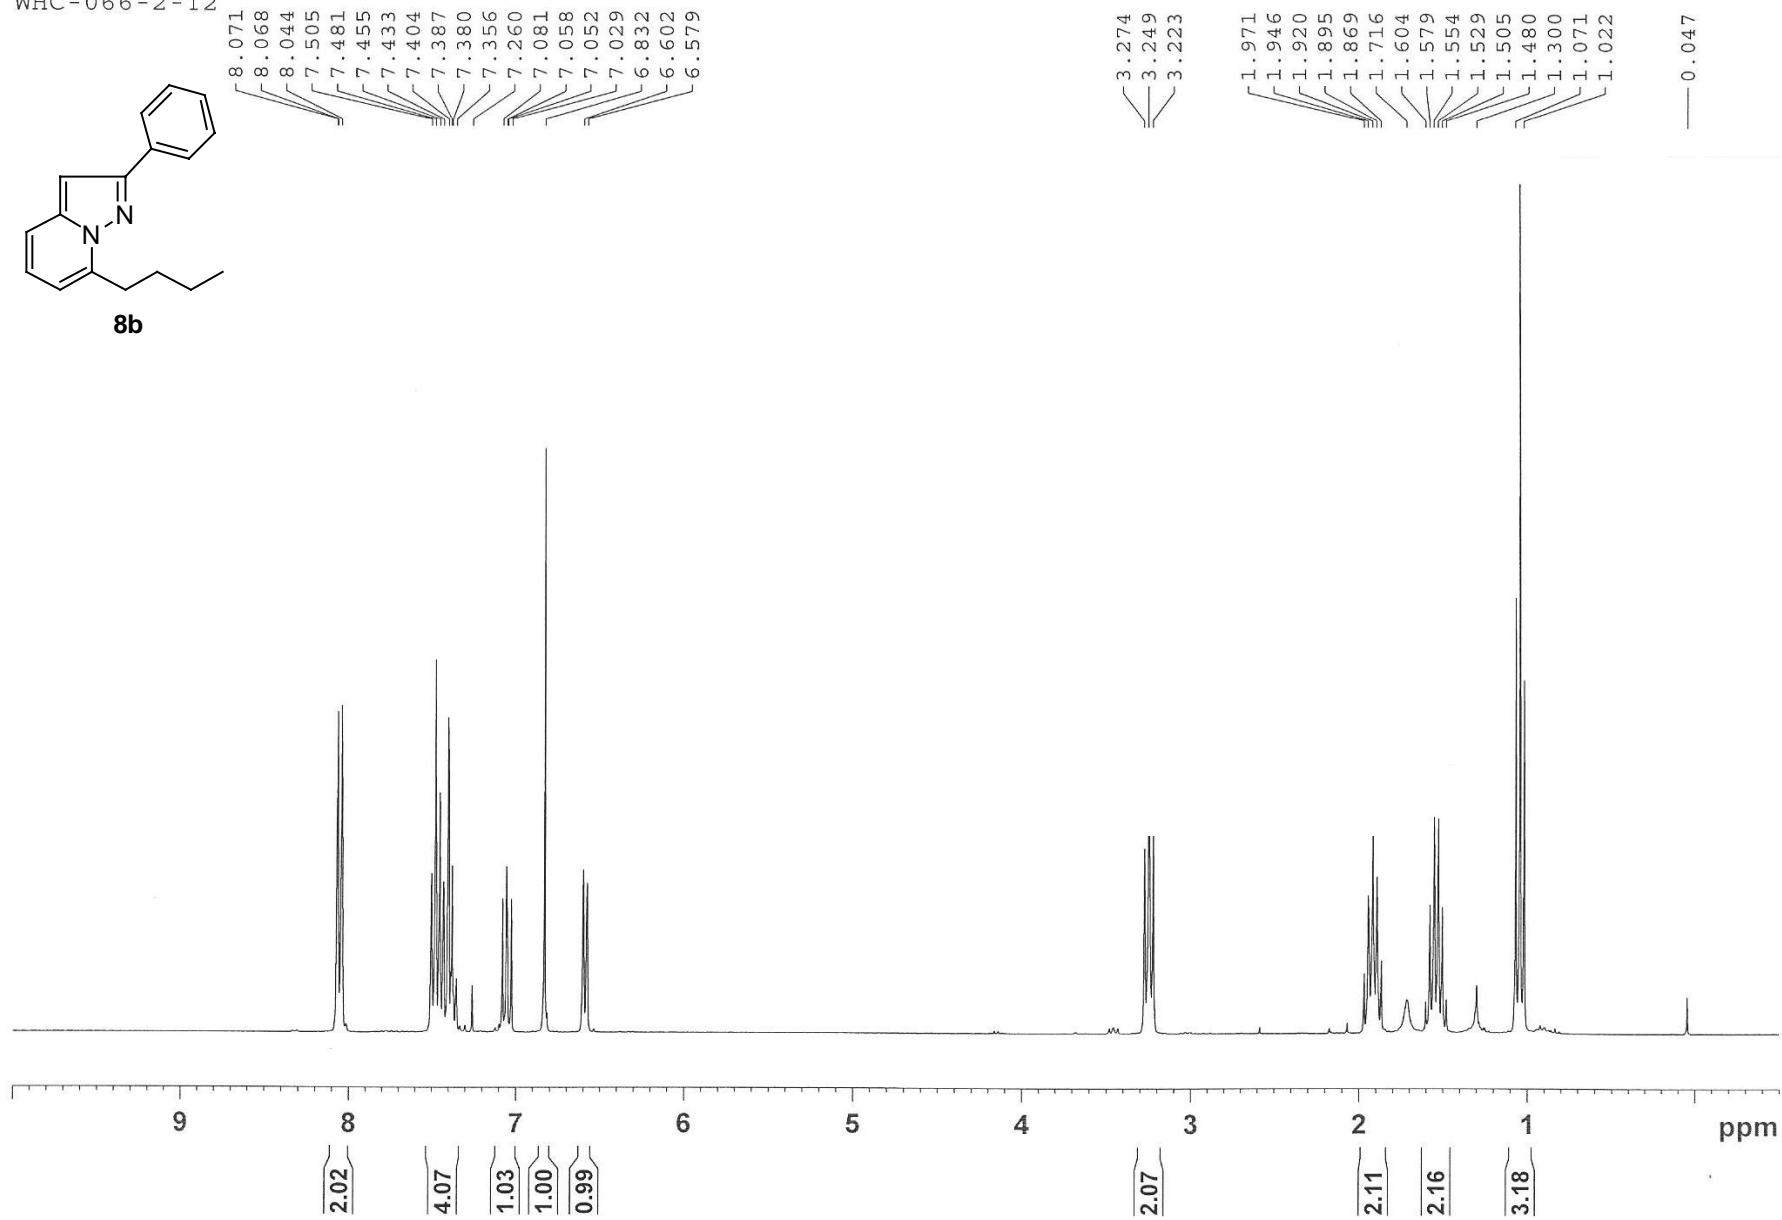

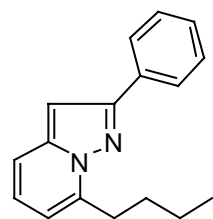

8b

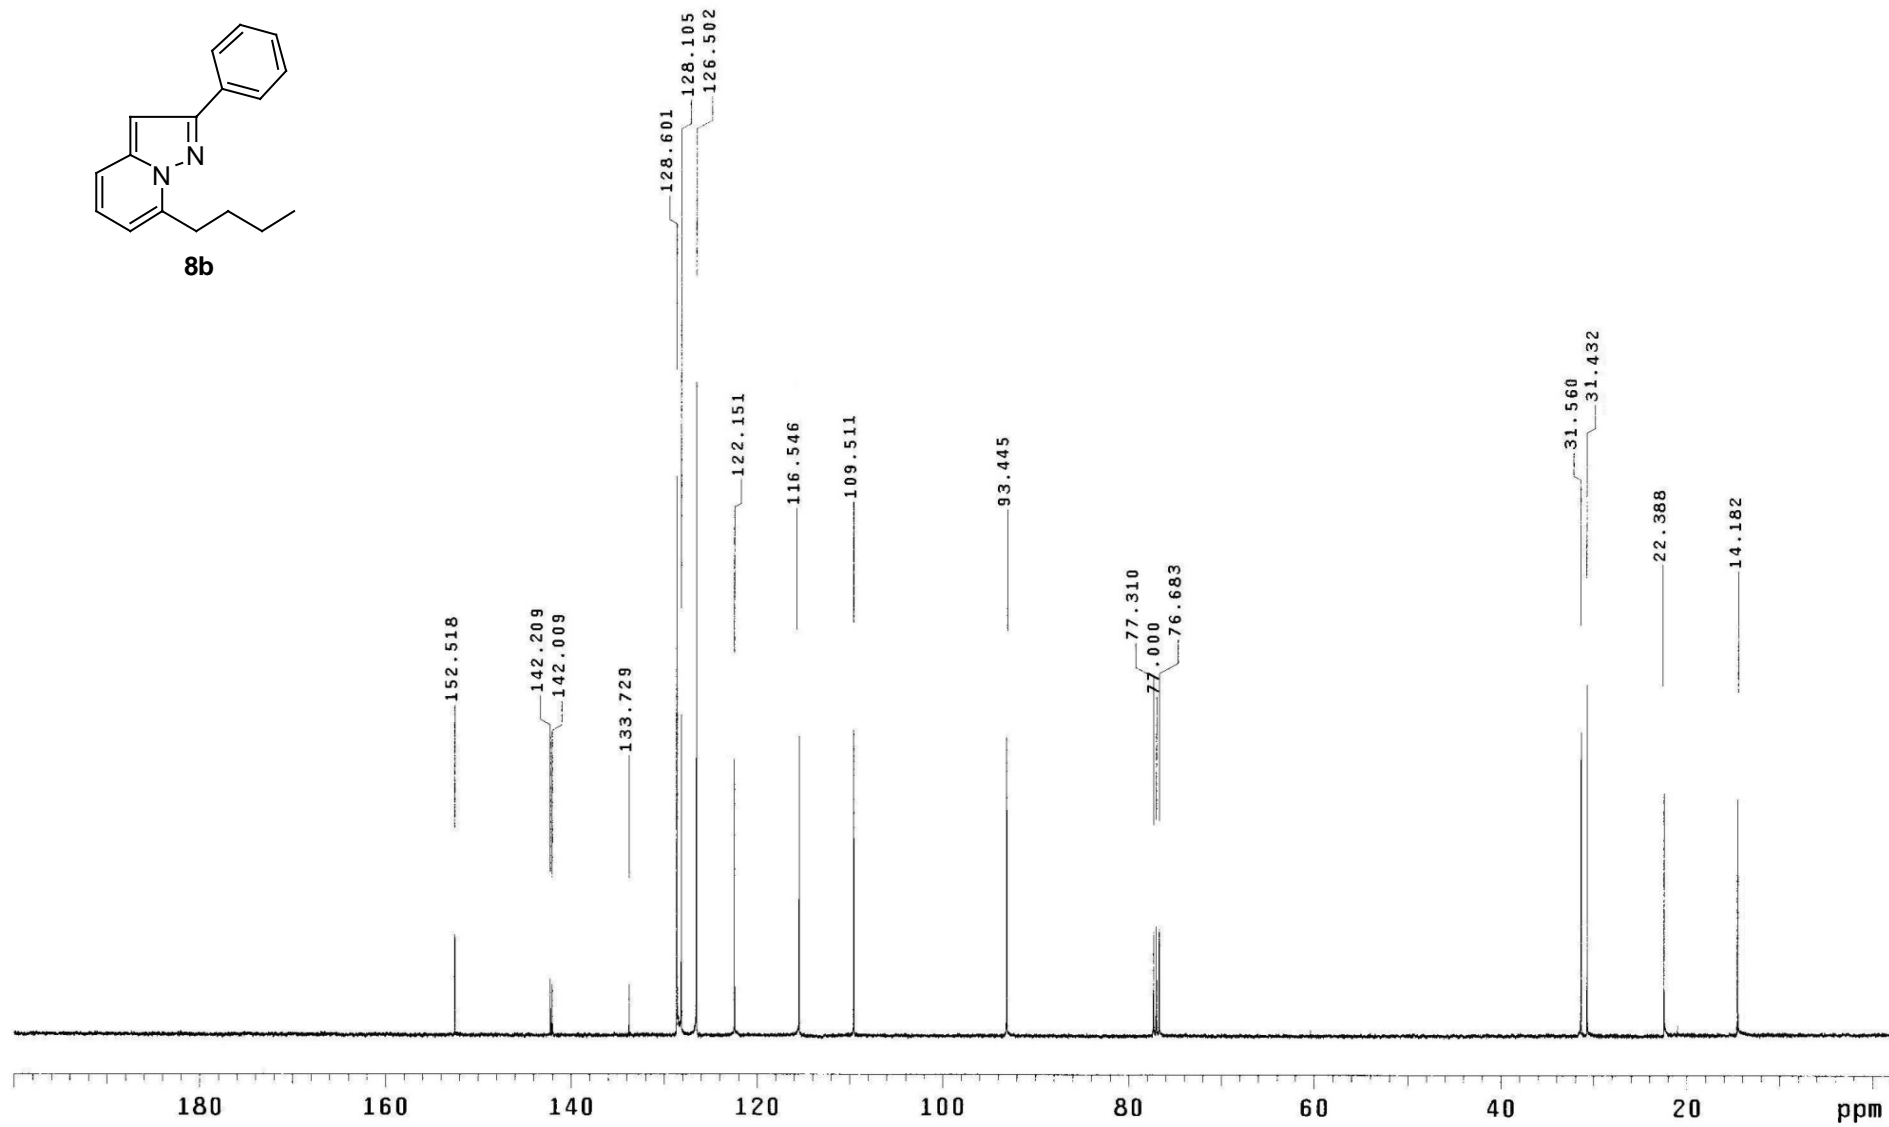

WHC-055-T2

Mercury-400BB "Mercuryplus400"  
Date: Nov 6 2009  
Solvent: CDCl3  
Ambient temperature  
Total 32 repetitions

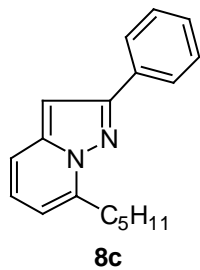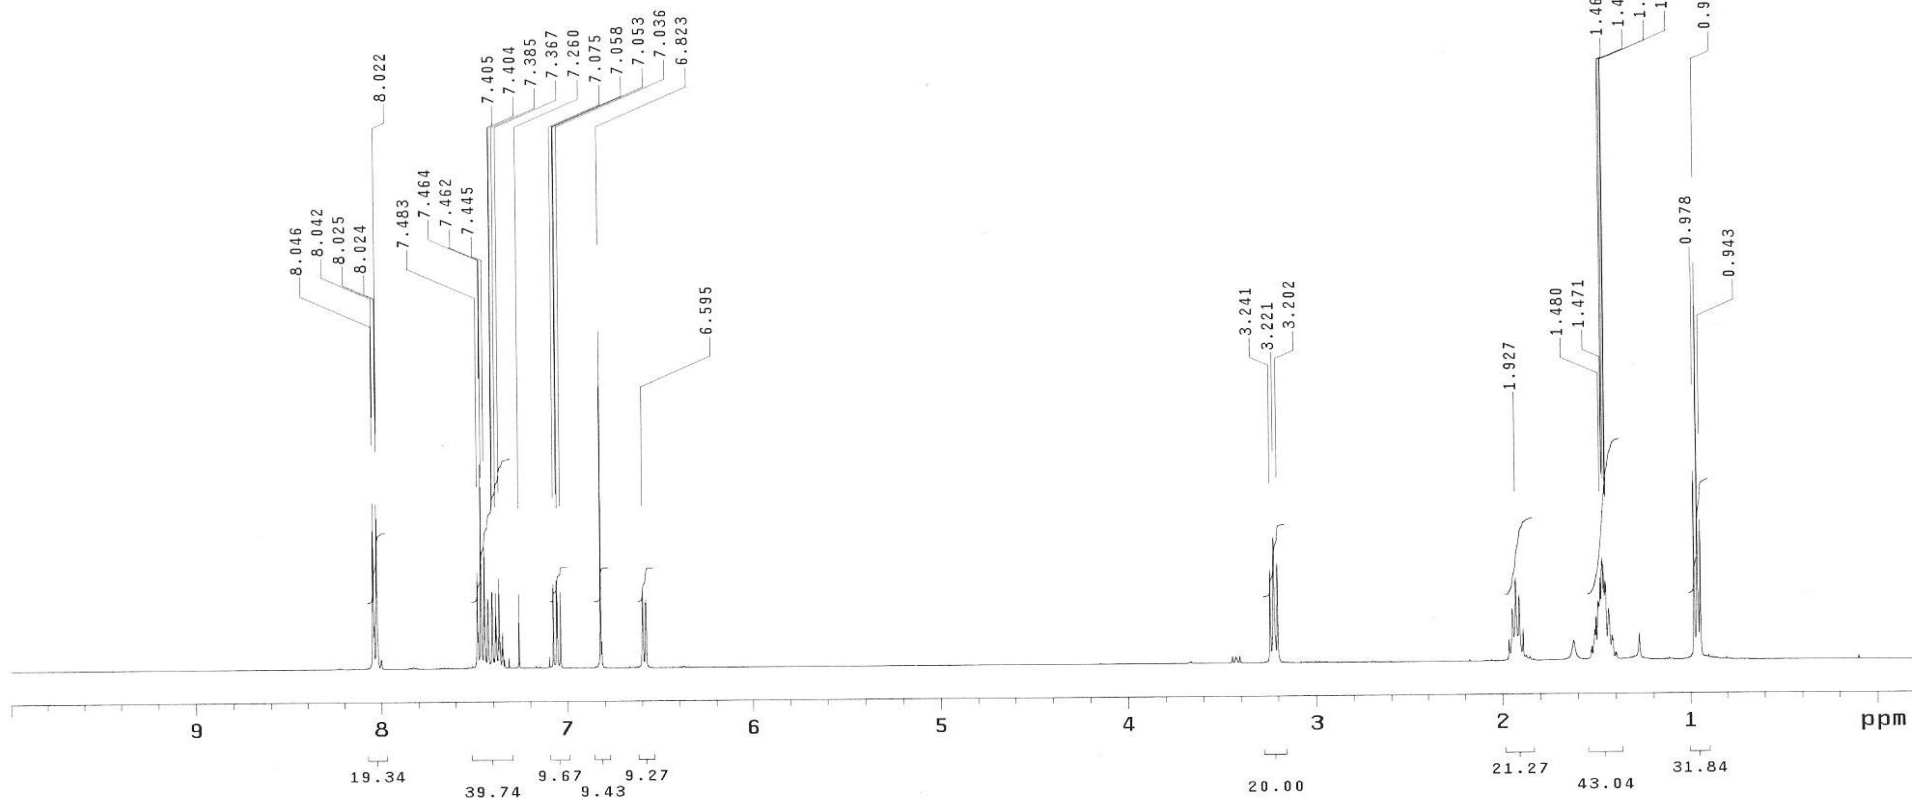

WHC-055-T2

Mercury-400BB "Mercuryplus400"  
Date: Nov 6 2009  
Solvent: CDCl3  
Ambient temperature  
Total 7232 repetitions

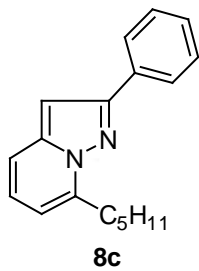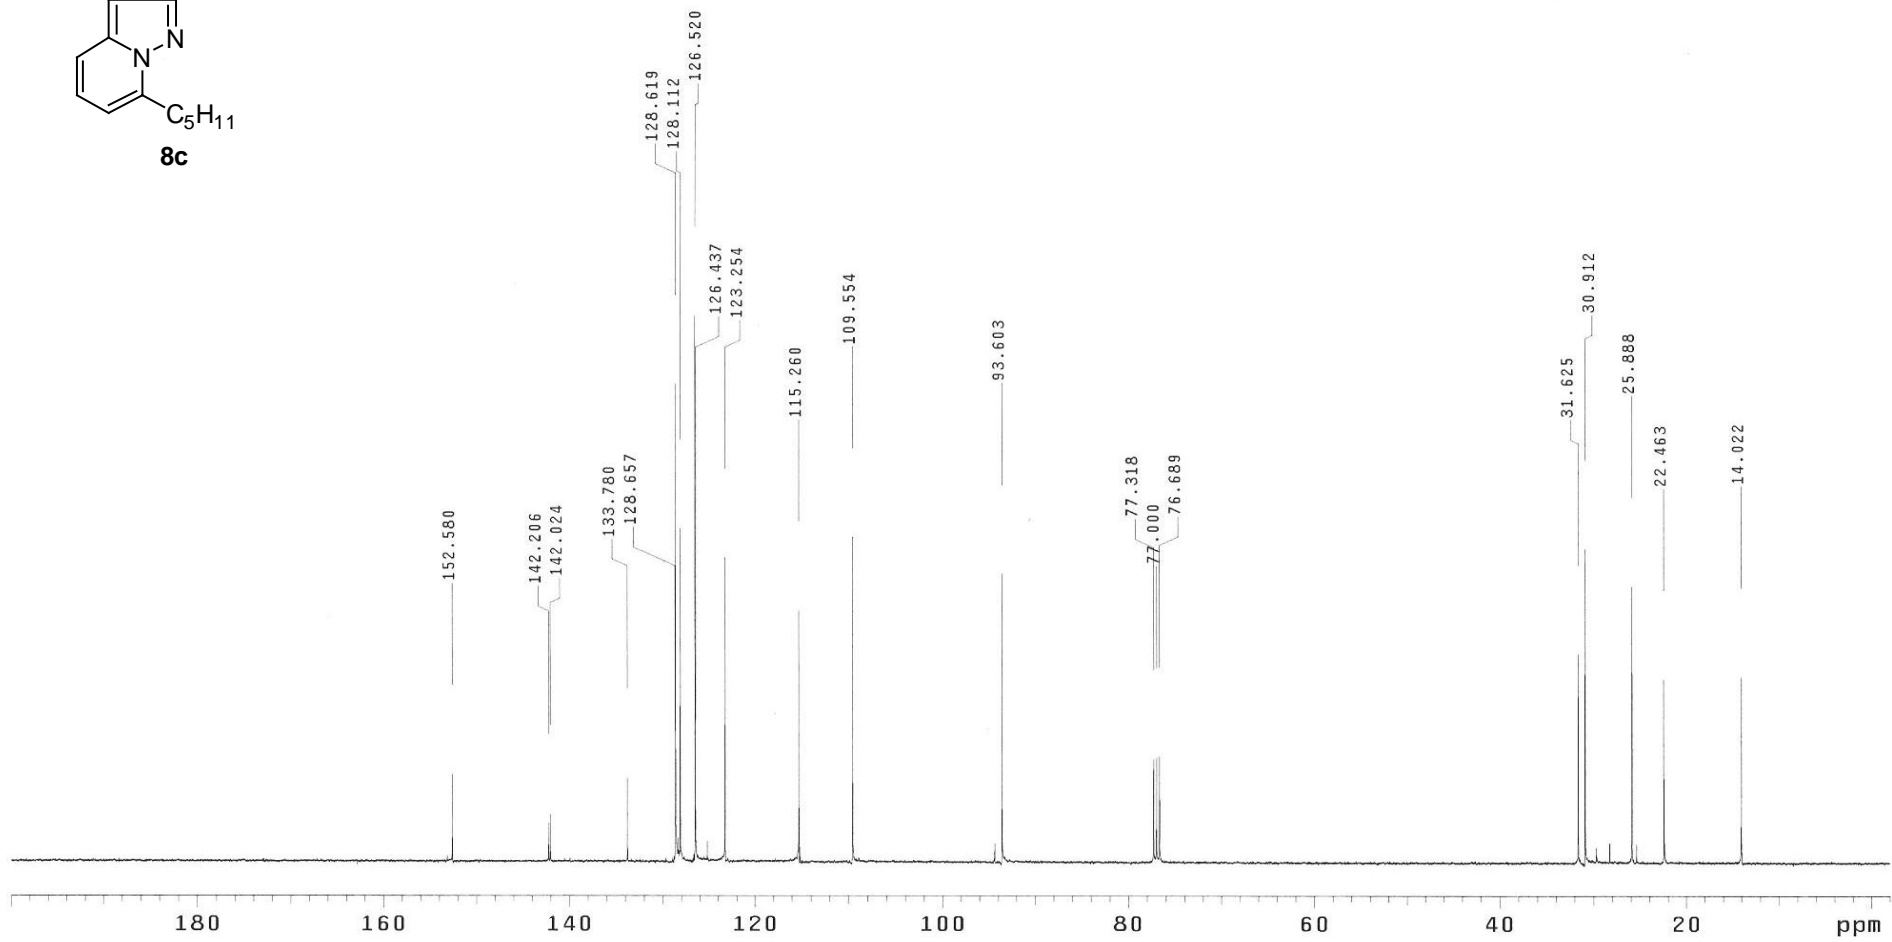

WHC-082-2

NAME WHC-082-2  
EXPNO 1  
PROCNO 1  
Date\_ 20091020  
Time 14.20  
INSTRUM spect  
PROBHD 5 mm PABBO BB-  
PULPROG zg30  
TD 16384  
SOLVENT CDCl3  
NS 32  
DS 0  
SWH 4807.692 Hz  
FIDRES 0.293438 Hz  
AQ 1.7039860 sec  
RG 161  
DW 104.000 usec  
DE 6.50 usec  
TE 300.0 K  
DL 2.00000000 sec  
TDO 1

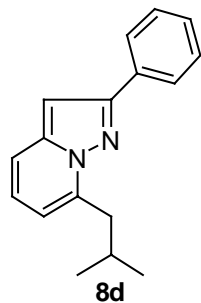

===== CHANNEL f1 =====  
NUC1 1H  
P1 10.80 usec  
PL1 -1.00 dB  
PL1W 10.11928844 W  
SFO1 300.1321009 MHz  
SI 8192  
SF 300.1300056 MHz  
WDW EM  
SSB 0  
LB 0.00 Hz  
GB 0  
PC 1.00

8.029  
8.005  
7.476  
7.452  
7.427  
7.400  
7.376  
7.359  
7.353  
7.327  
7.260  
7.069  
7.046  
7.040  
7.016  
6.809  
6.565  
6.541  
  
3.089  
3.066  
2.569  
2.547  
2.524  
2.502  
2.479  
2.457  
2.434  
  
1.048  
1.025

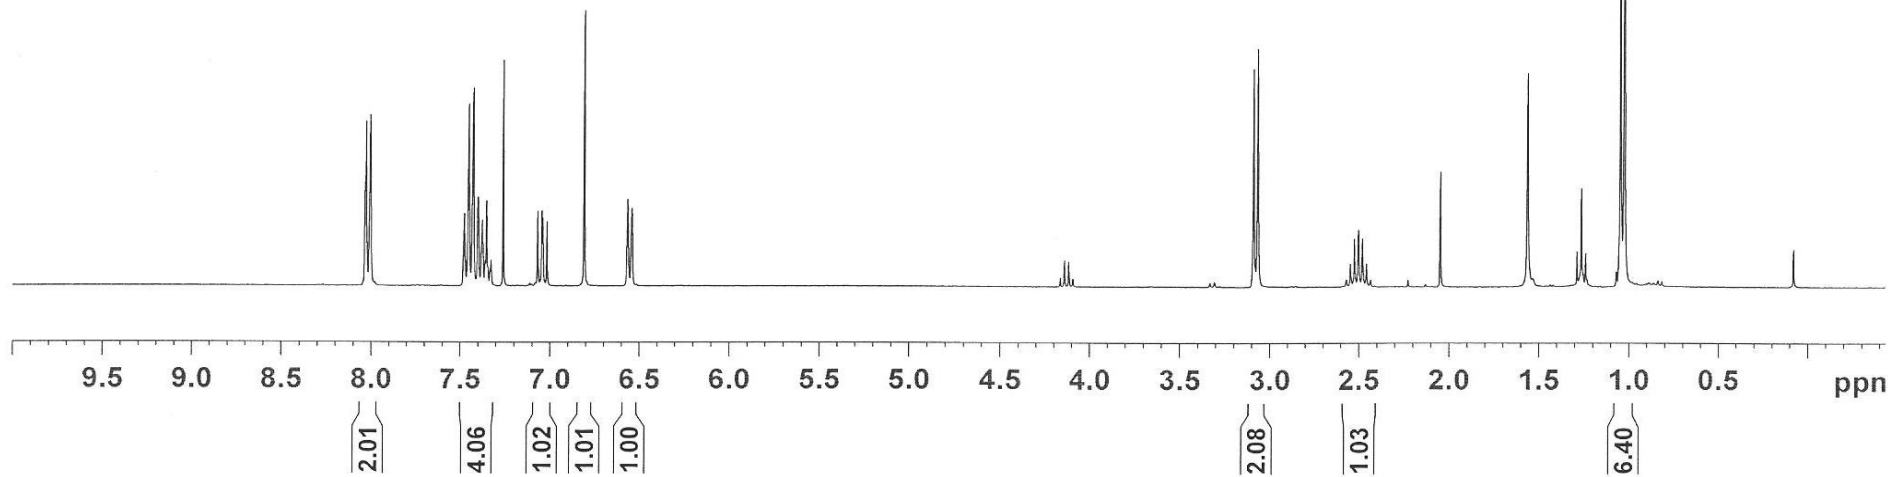

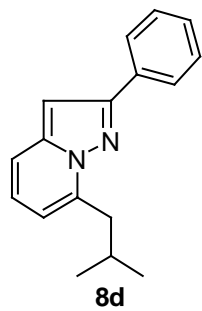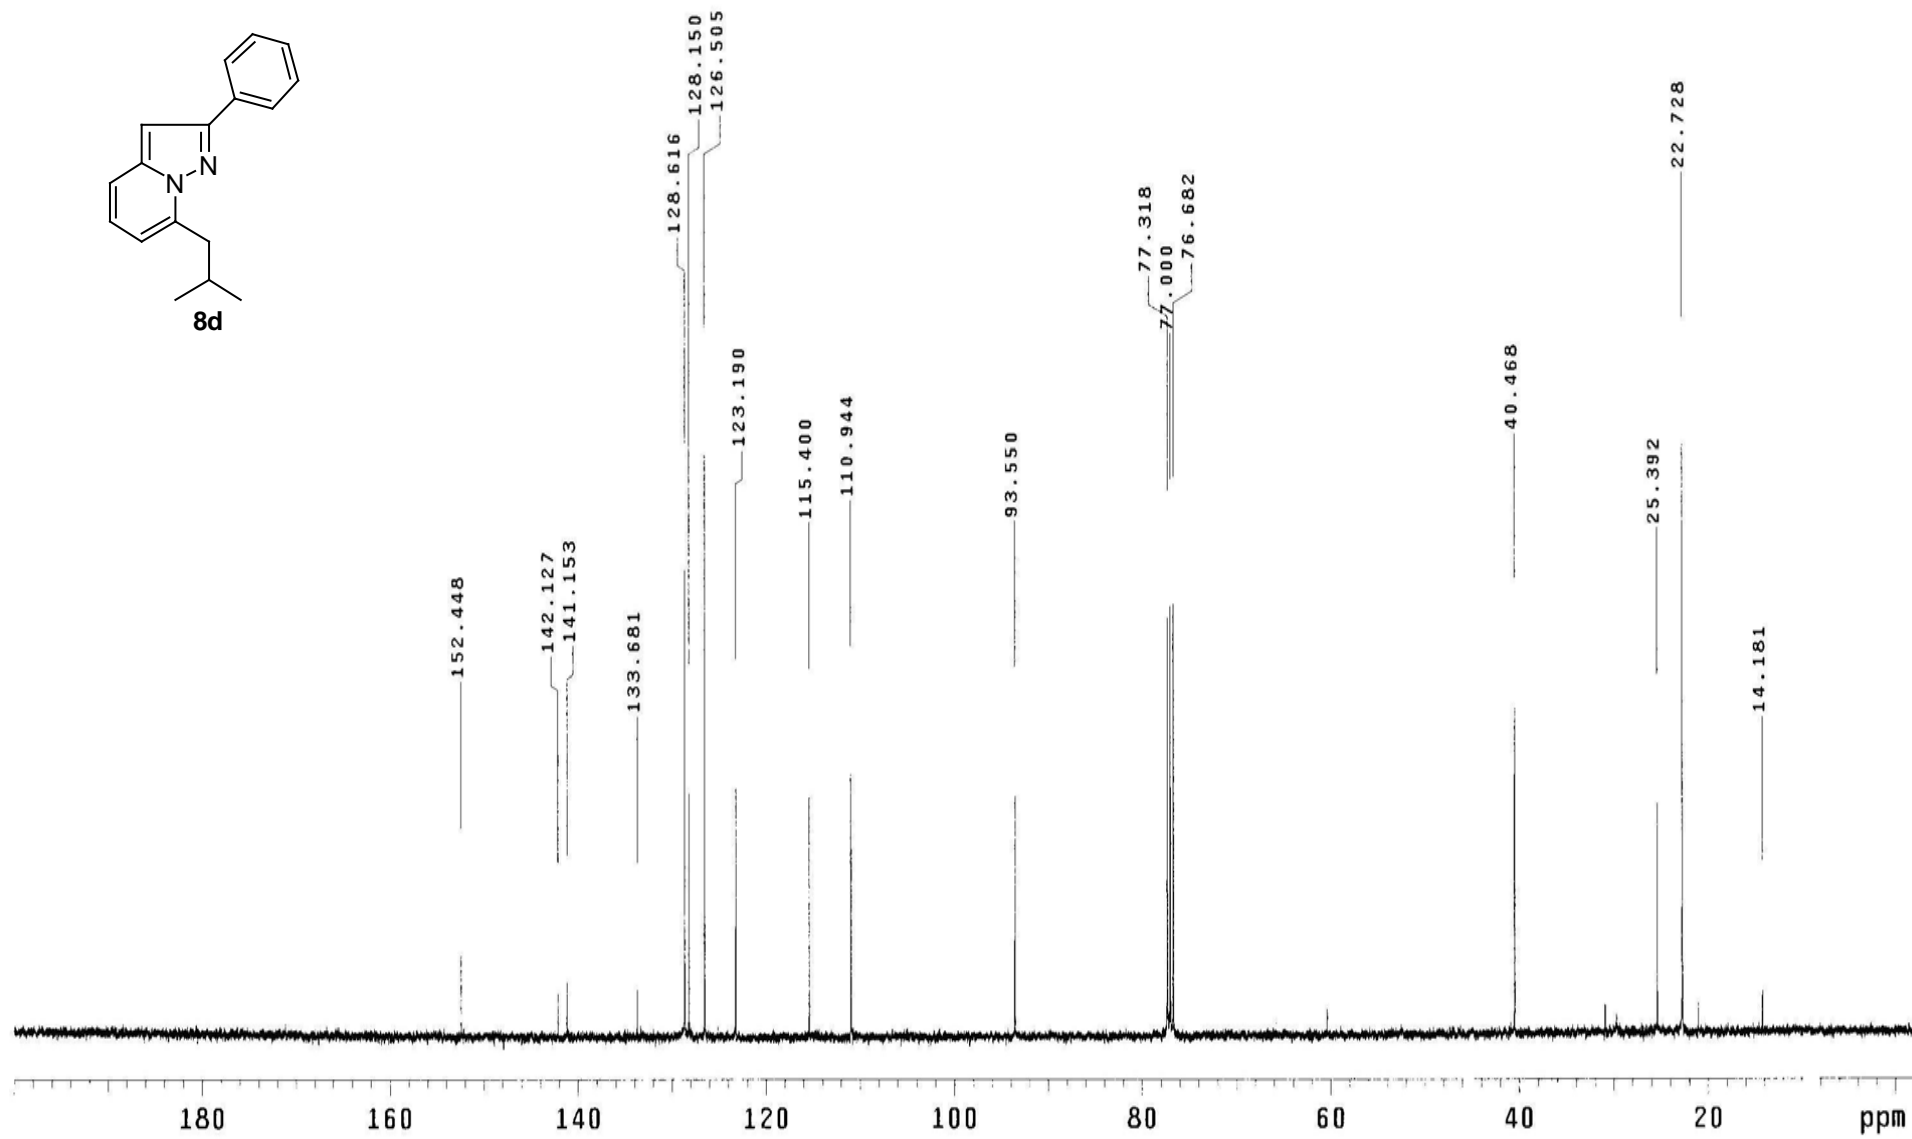

WHC-081-2-Liquid

Pulse Sequence: s2pu1

Solvent: CDC13

Ambient temperature

Mercury-200 "nsysu200"

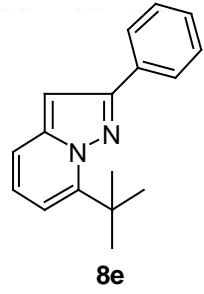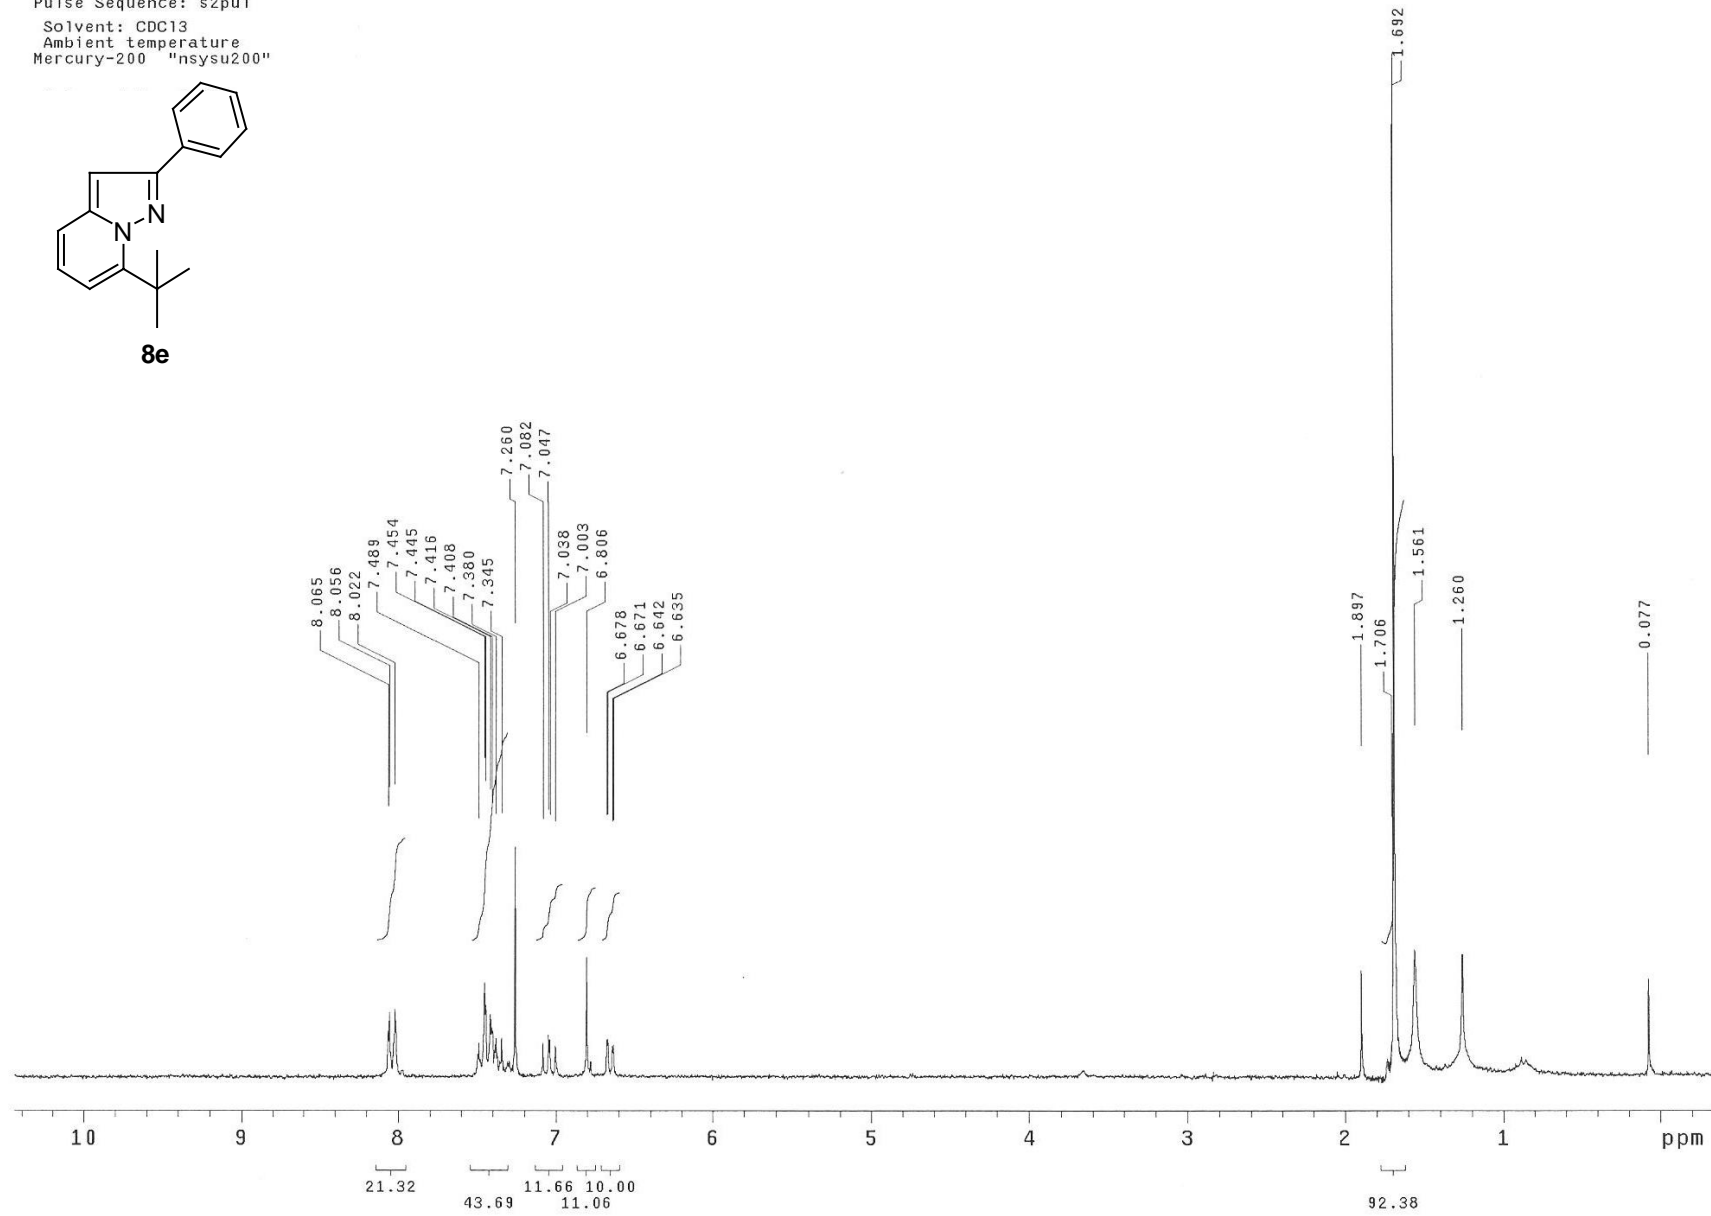

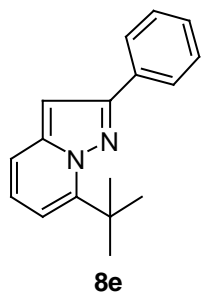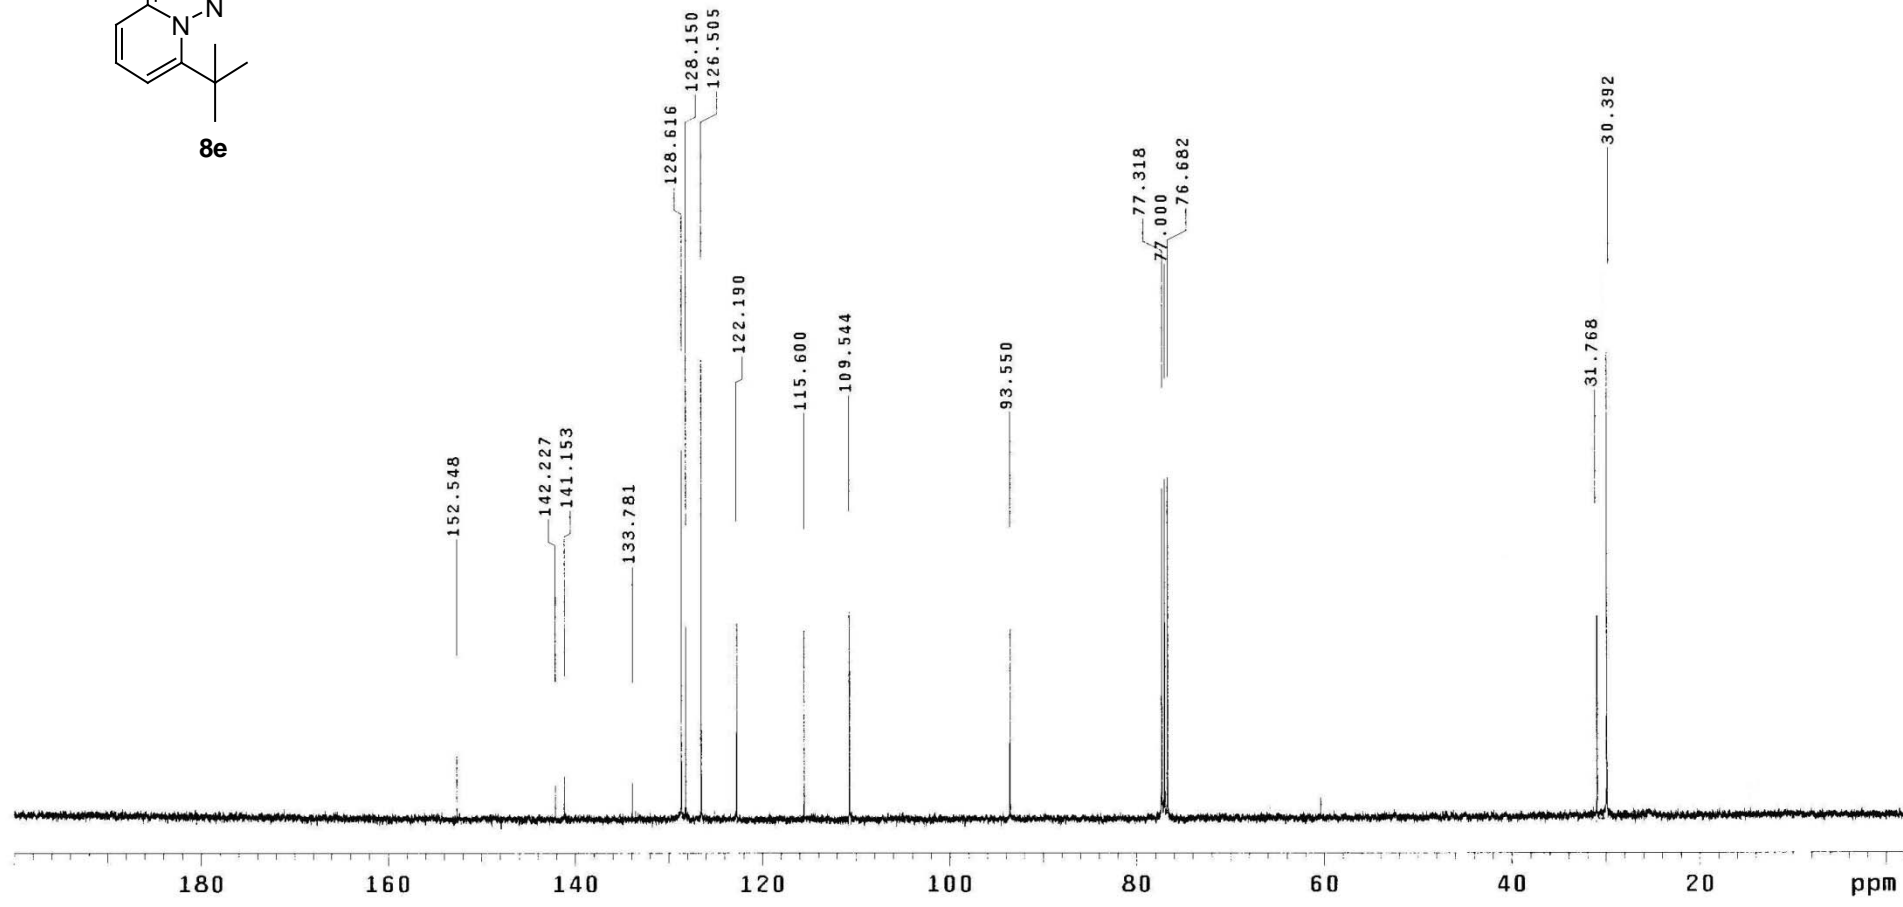



WHC-090

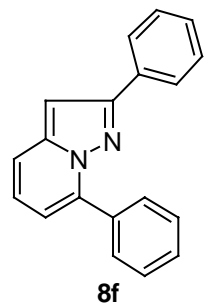

8.085  
8.080  
8.057  
8.003  
7.979  
7.580  
7.571  
7.551  
7.540  
7.526  
7.510  
7.475  
7.458  
7.434  
7.409  
7.370  
7.347  
7.323  
7.260  
7.201  
7.178  
7.174  
7.149  
6.906  
6.850  
6.828

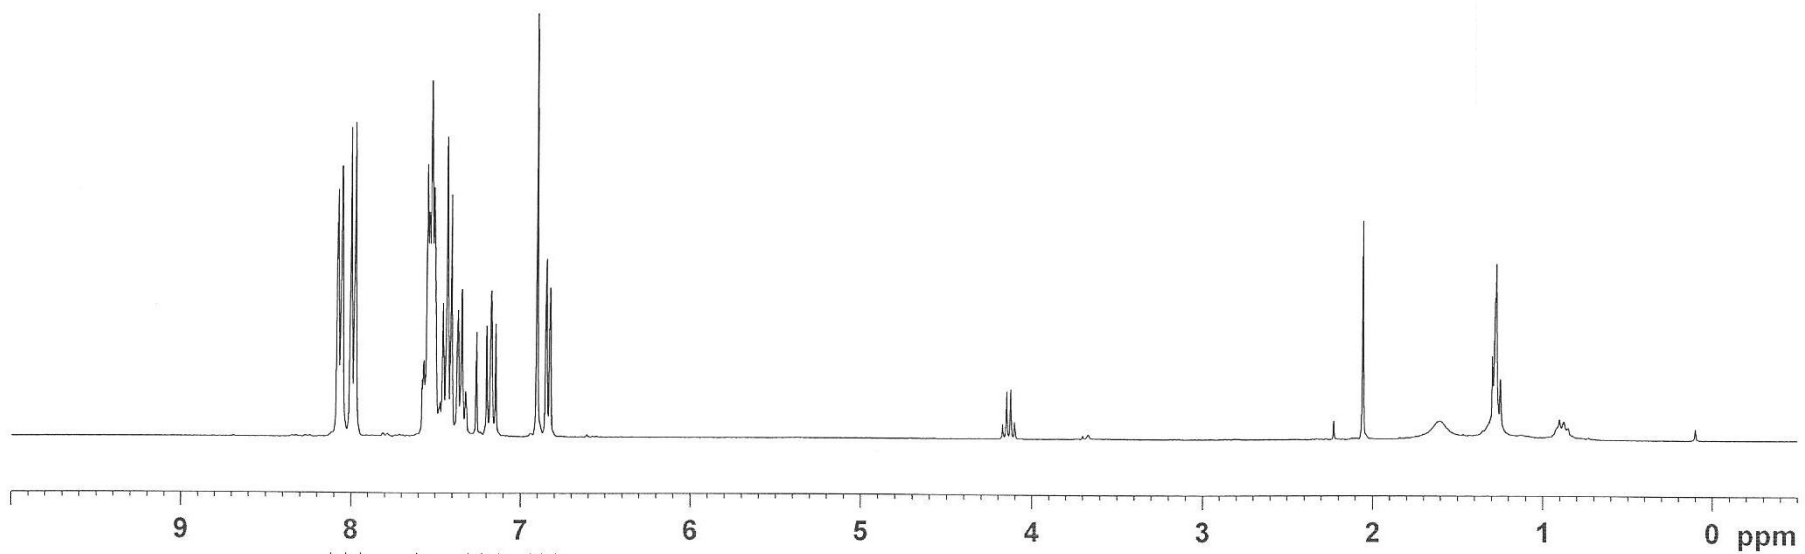

1.98  
2.00  
7.19  
1.04  
1.00  
1.00

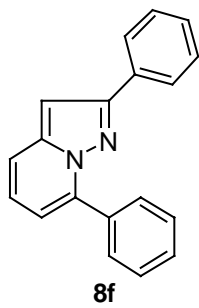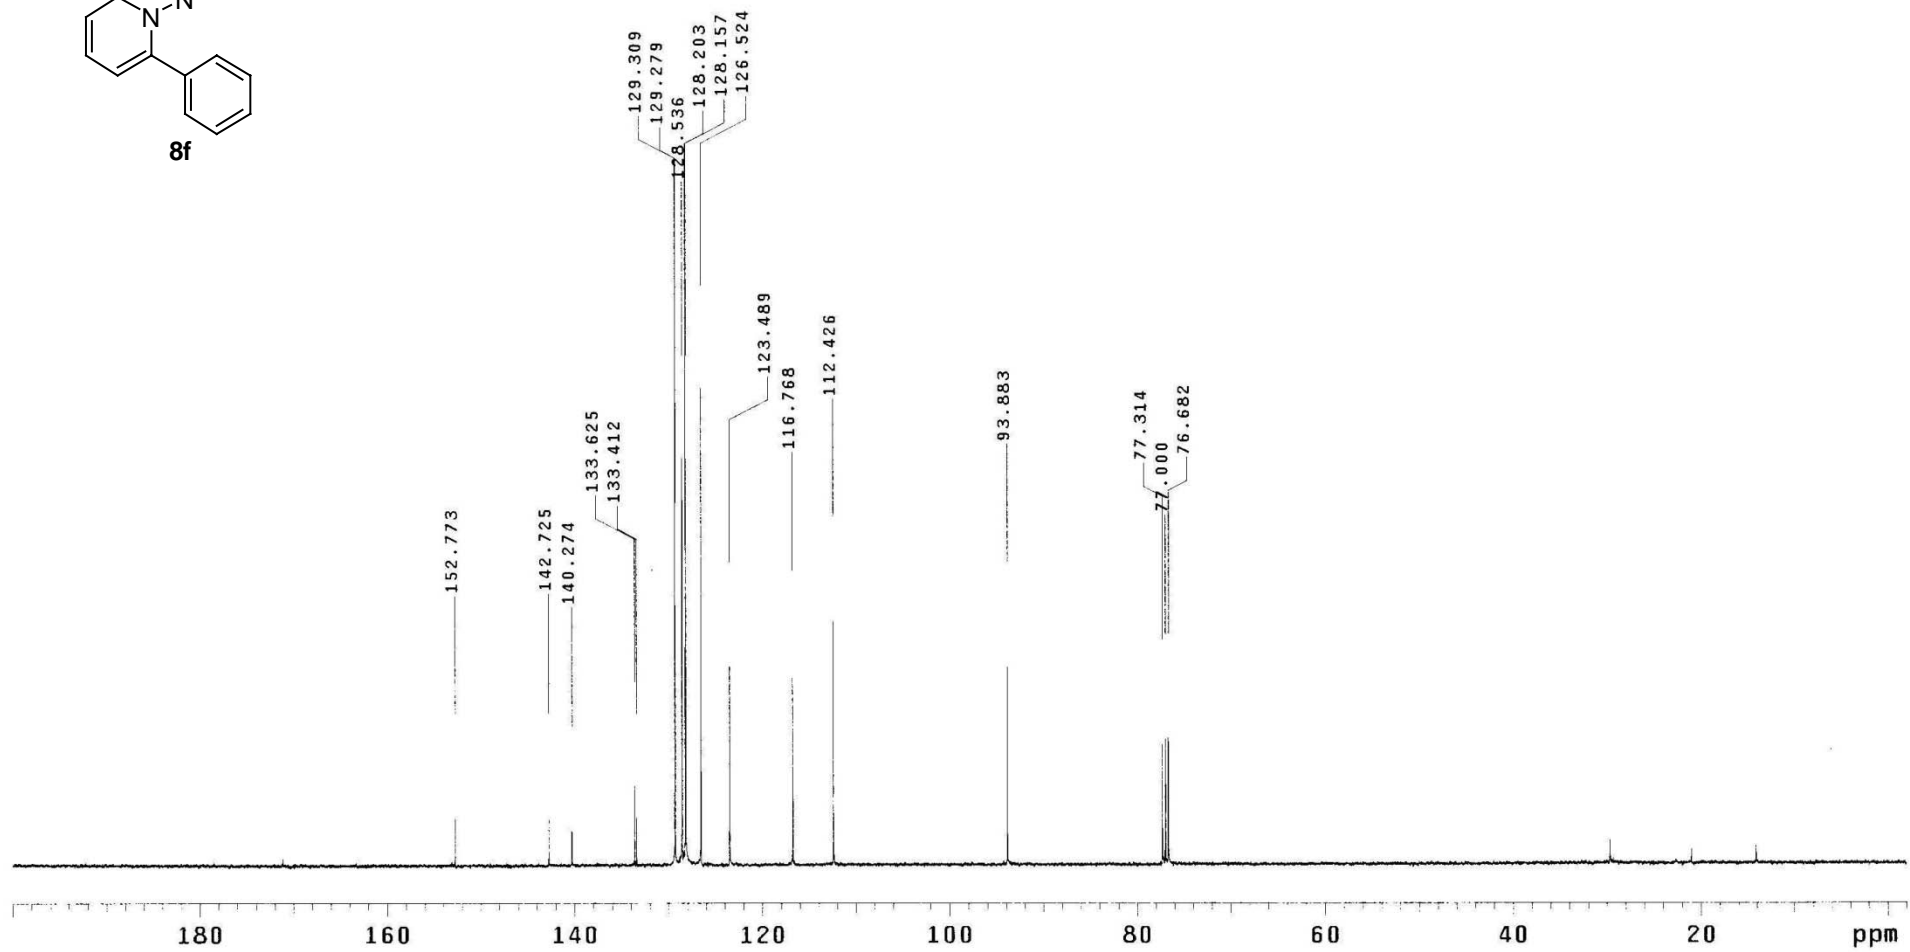

WHJ-218

Mercury-400BB "Mercuryplus400"  
Date: Mar 31 2008  
Solvent: CDCl3  
Ambient temperature  
Total 36 repetitions

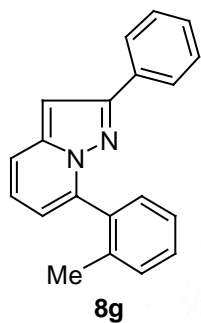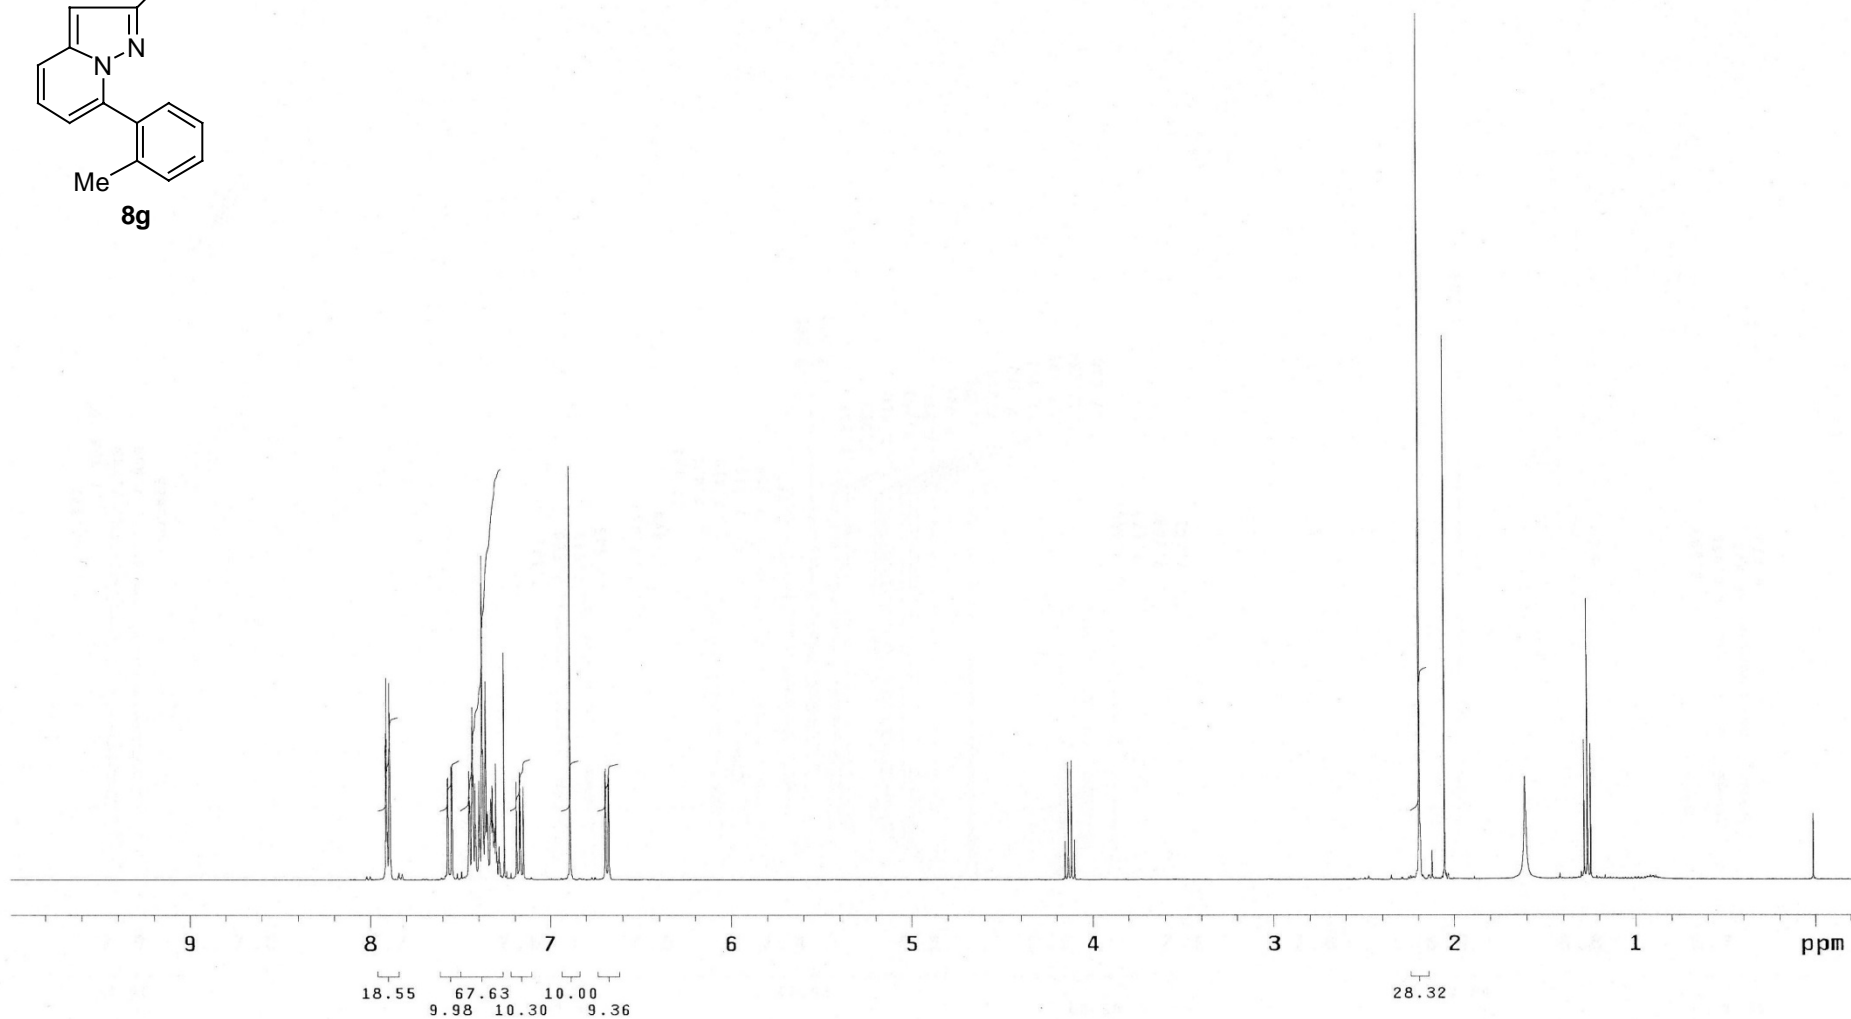

S-90

WHJ-218

Mercury-400BB "Mercuryplus400"  
Date: Mar 31 2008  
Solvent: CDCl3  
Ambient temperature  
Total 7680 repetitions

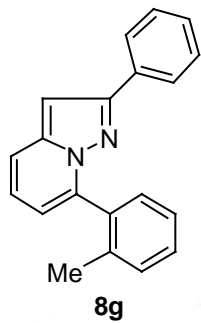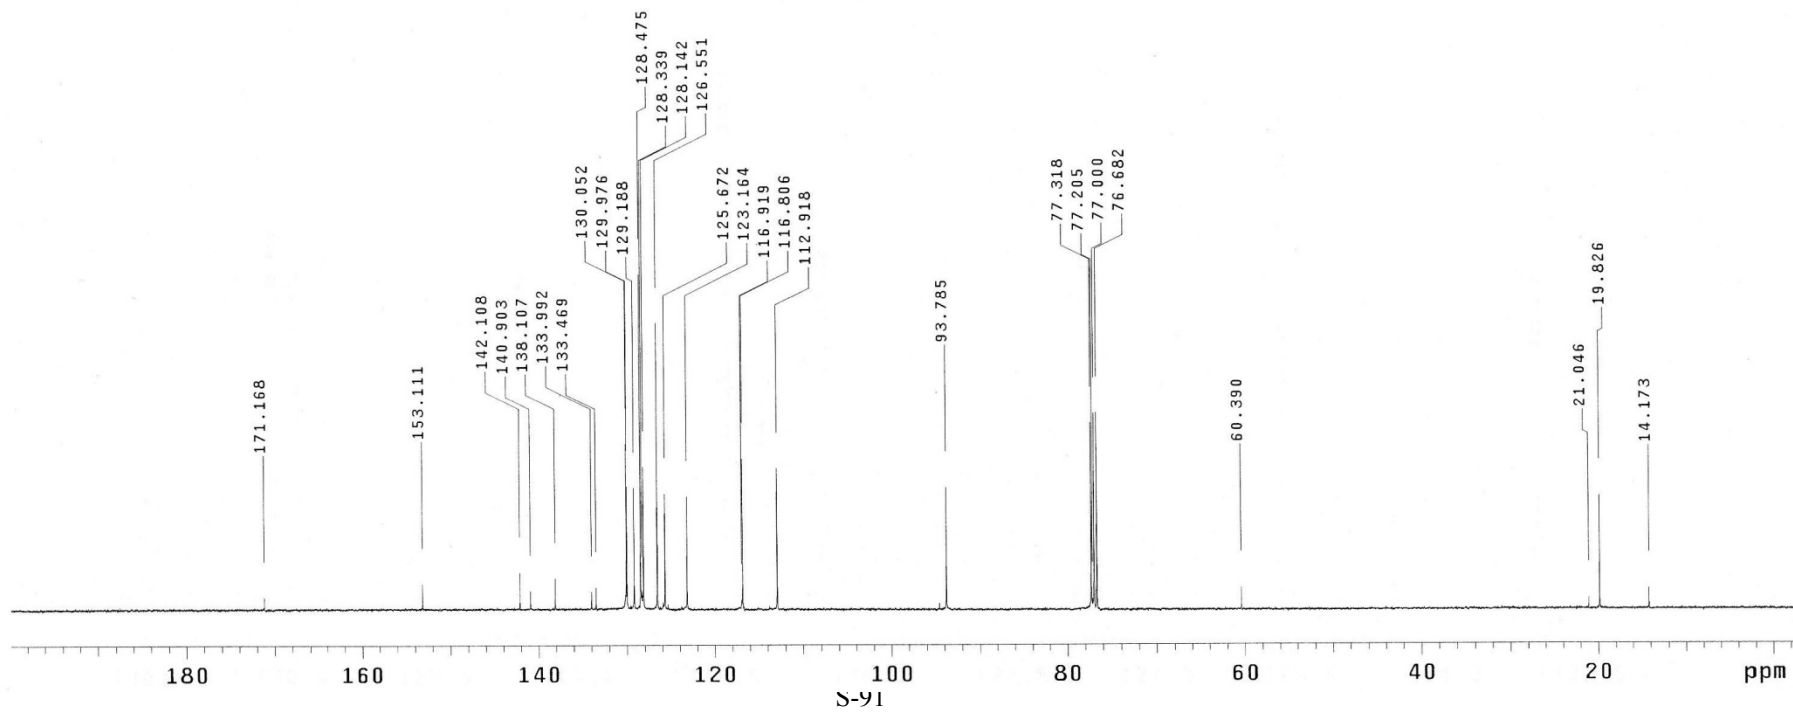

WHC-068-T1

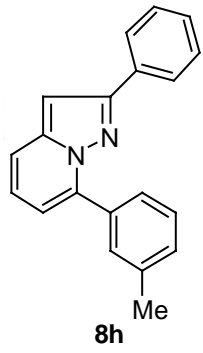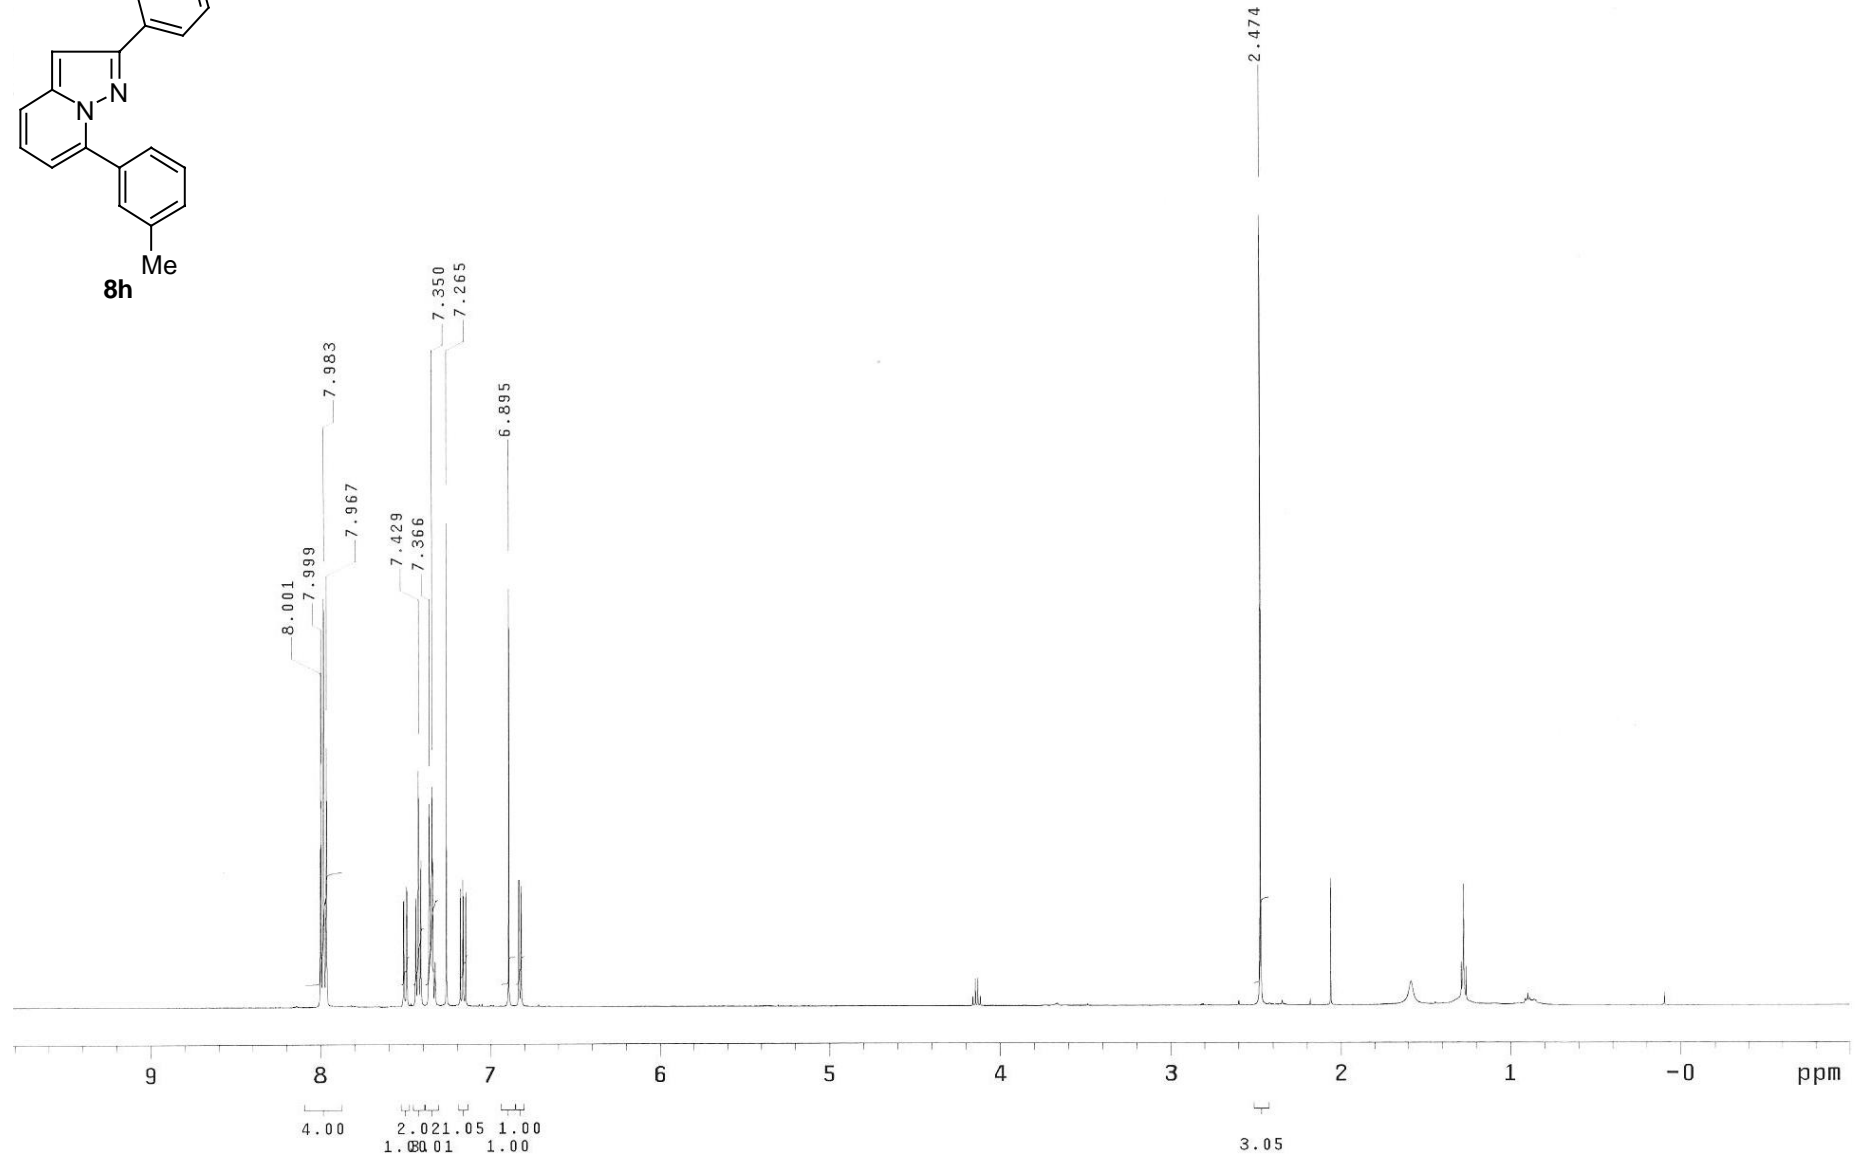

WHC-068-T1

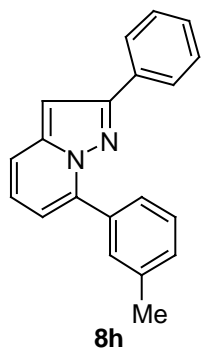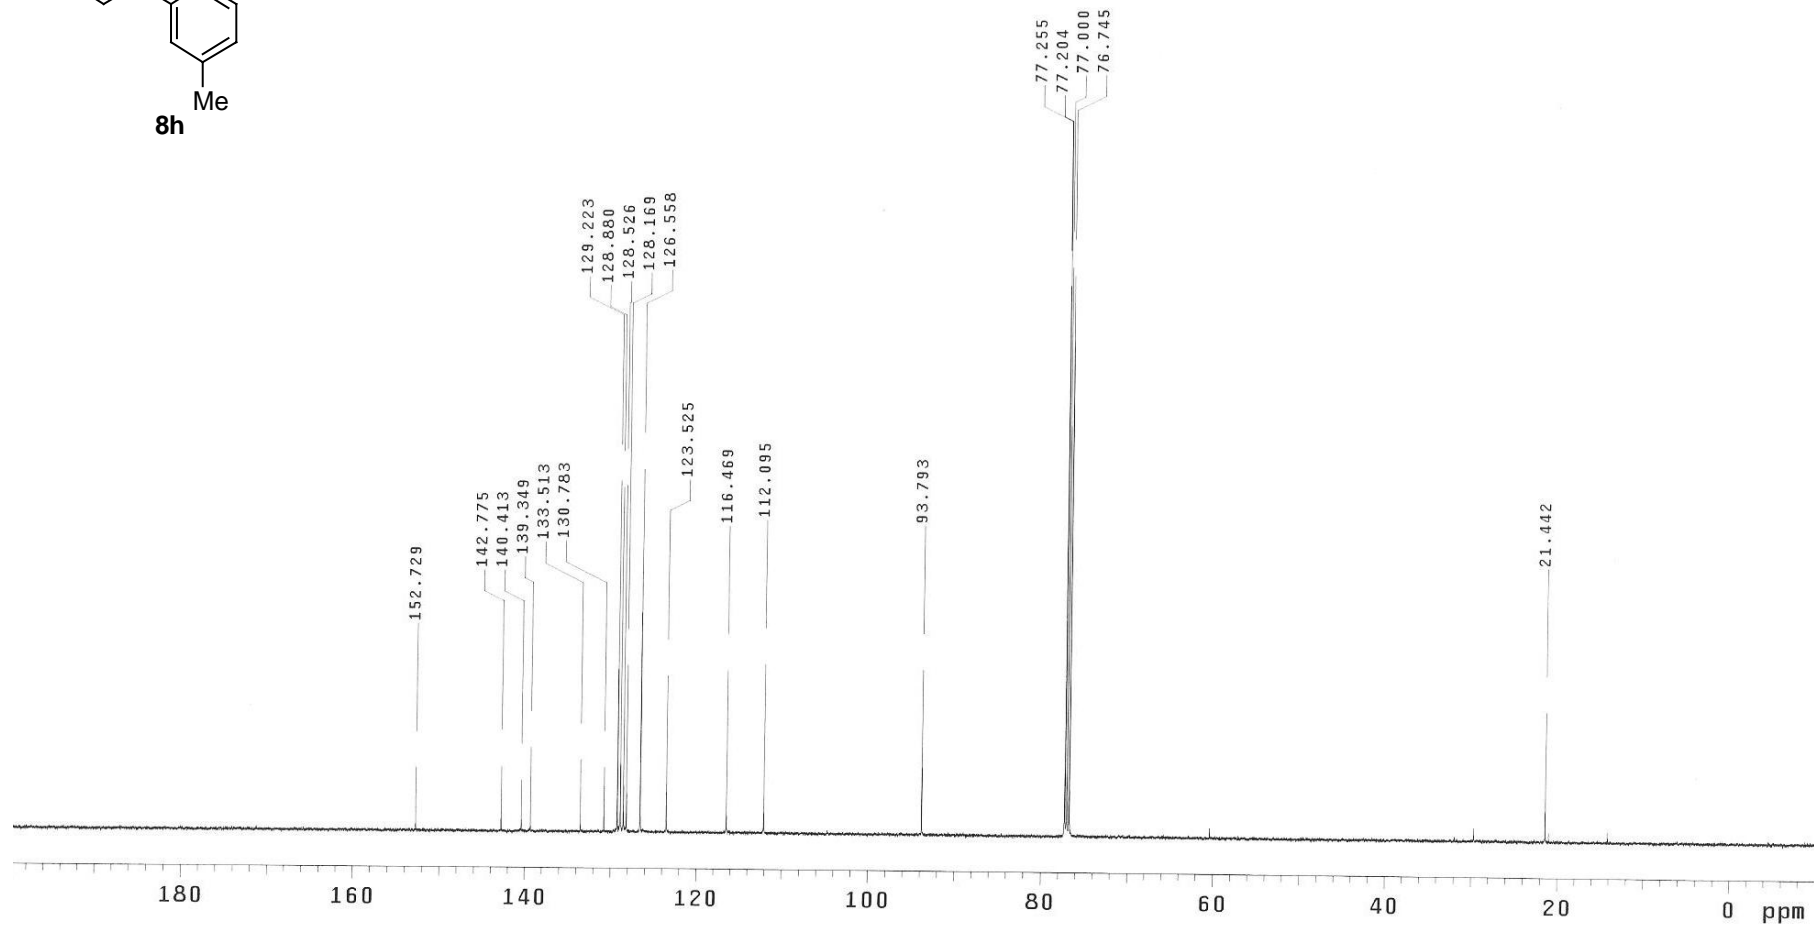

WHC-068-T1

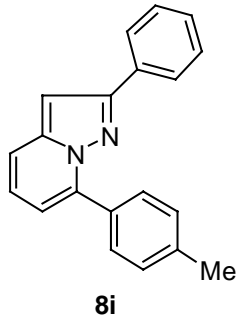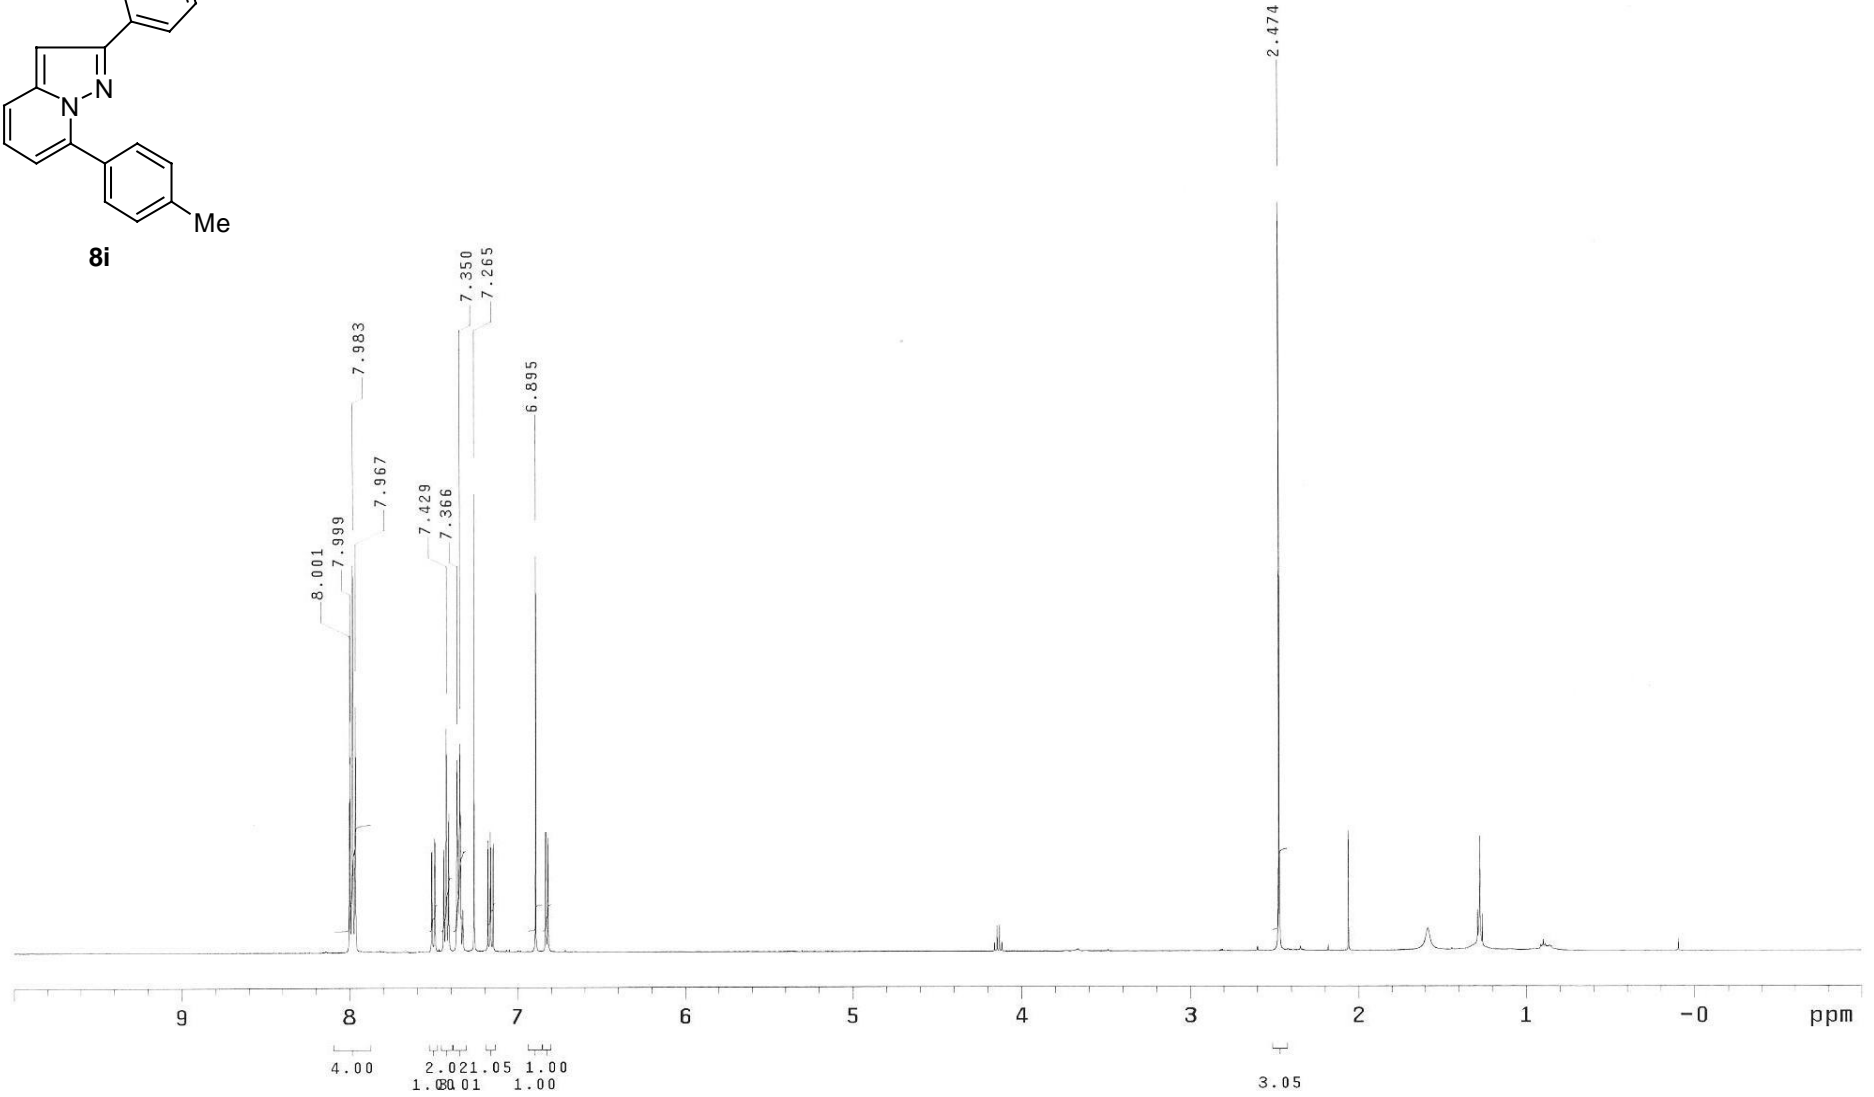

WHC-068-T1

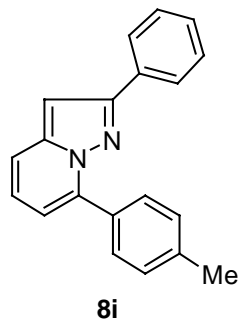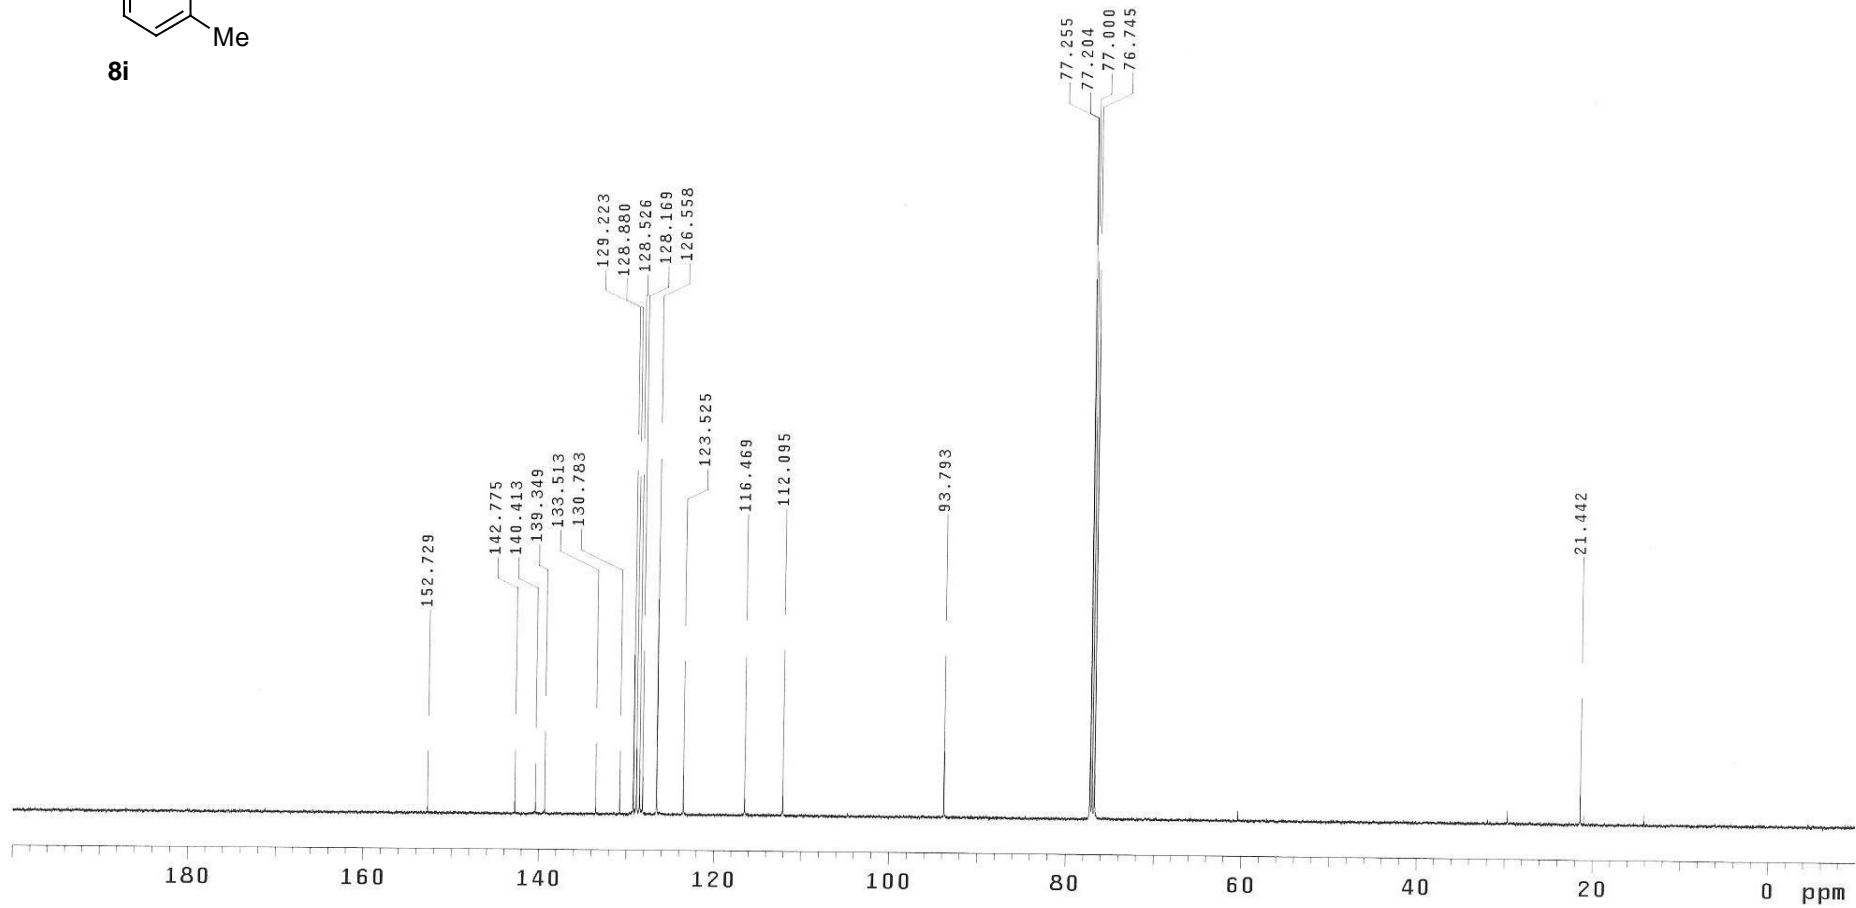

S-95



WHC-054-T2

Pulse Sequence: s2pu1

UNITYplus-400 "unityplus400"

Date: Sep 7 2009

Solvent: CDCl3

Ambient temperature

Total 64 repetitions

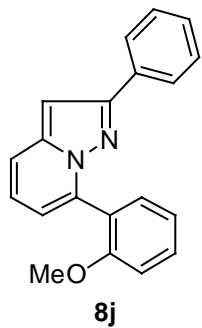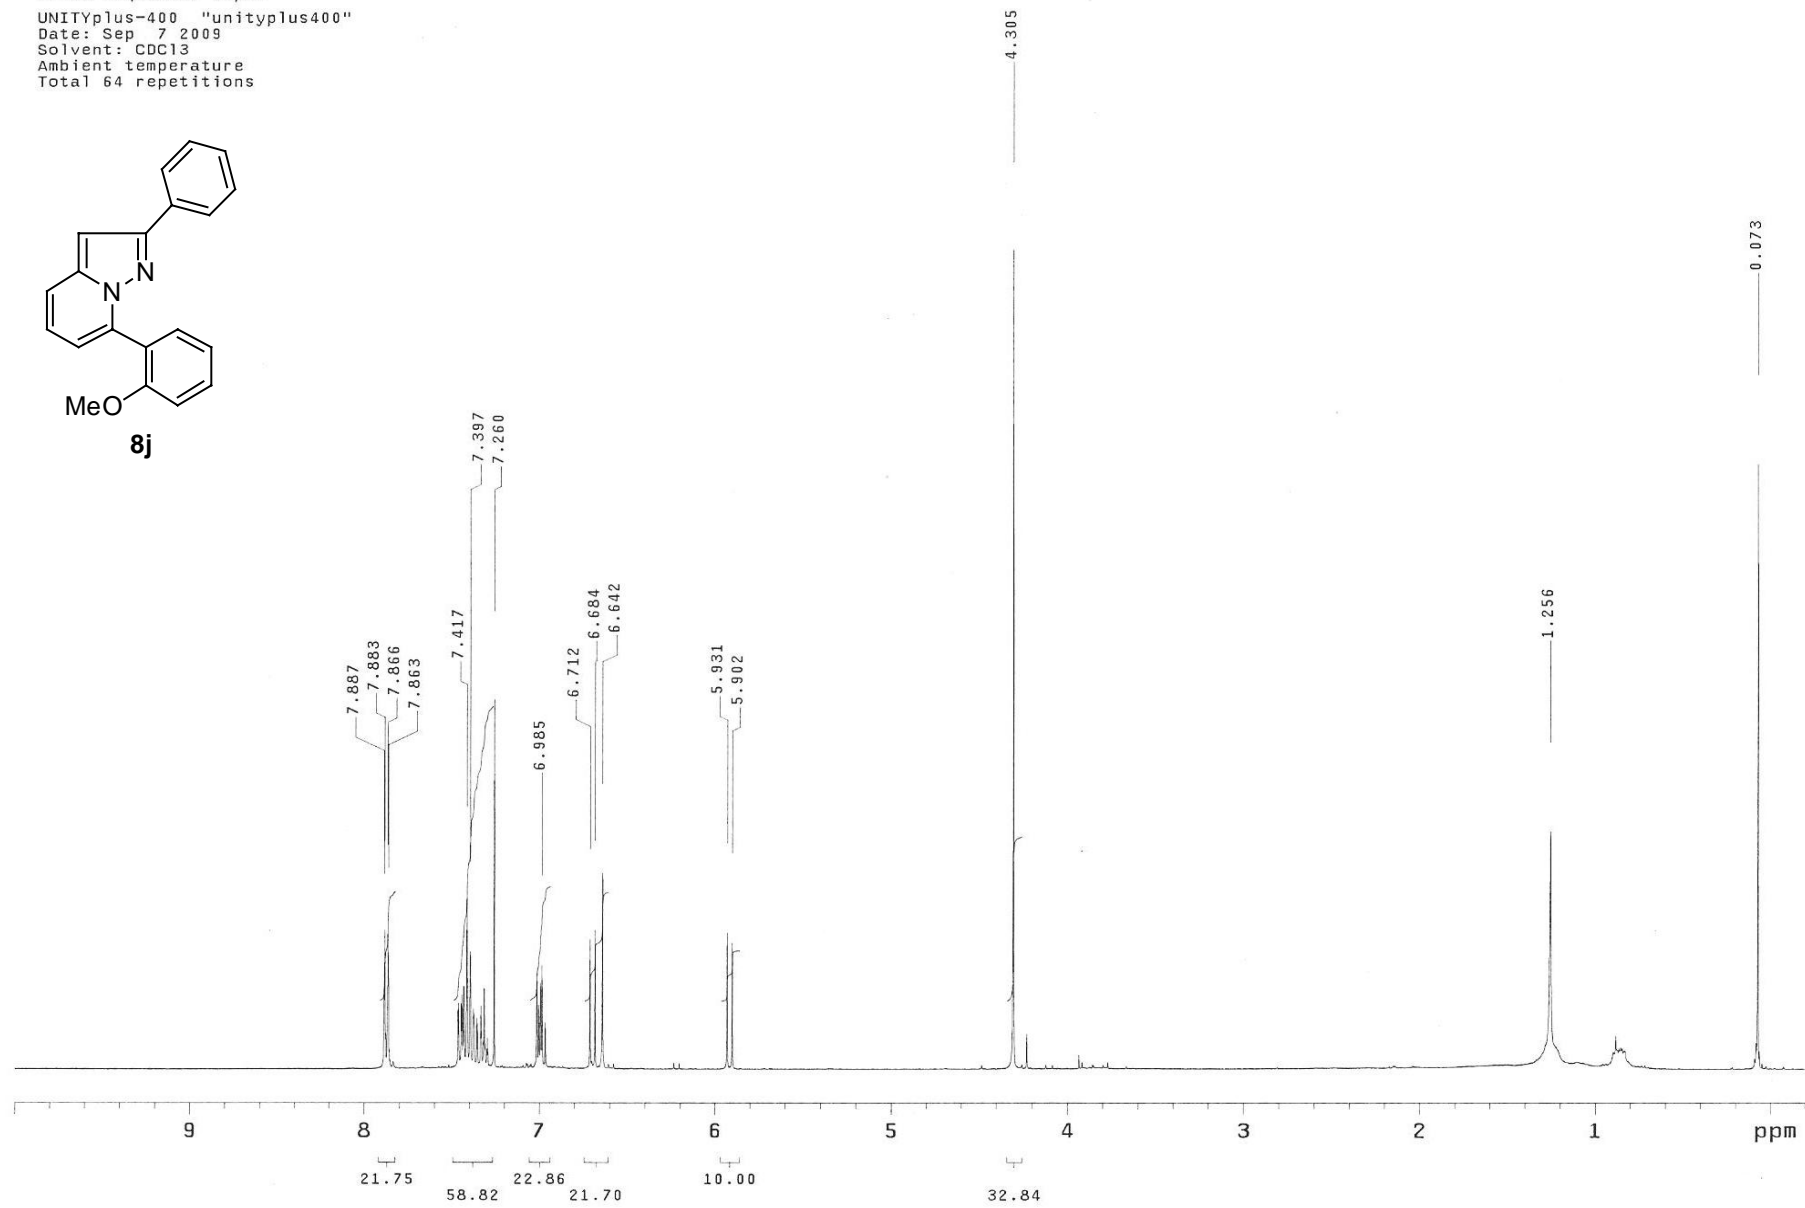

WHC-054-T2

Pulse Sequence: s2pu1

UNITYplus-400 "unityplus400"

Date: Sep 7 2009

Solvent: CDCl3

Ambient temperature

Total 10144 repetitions

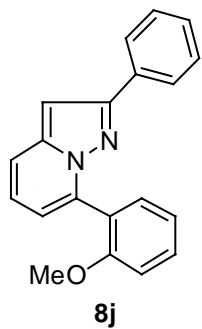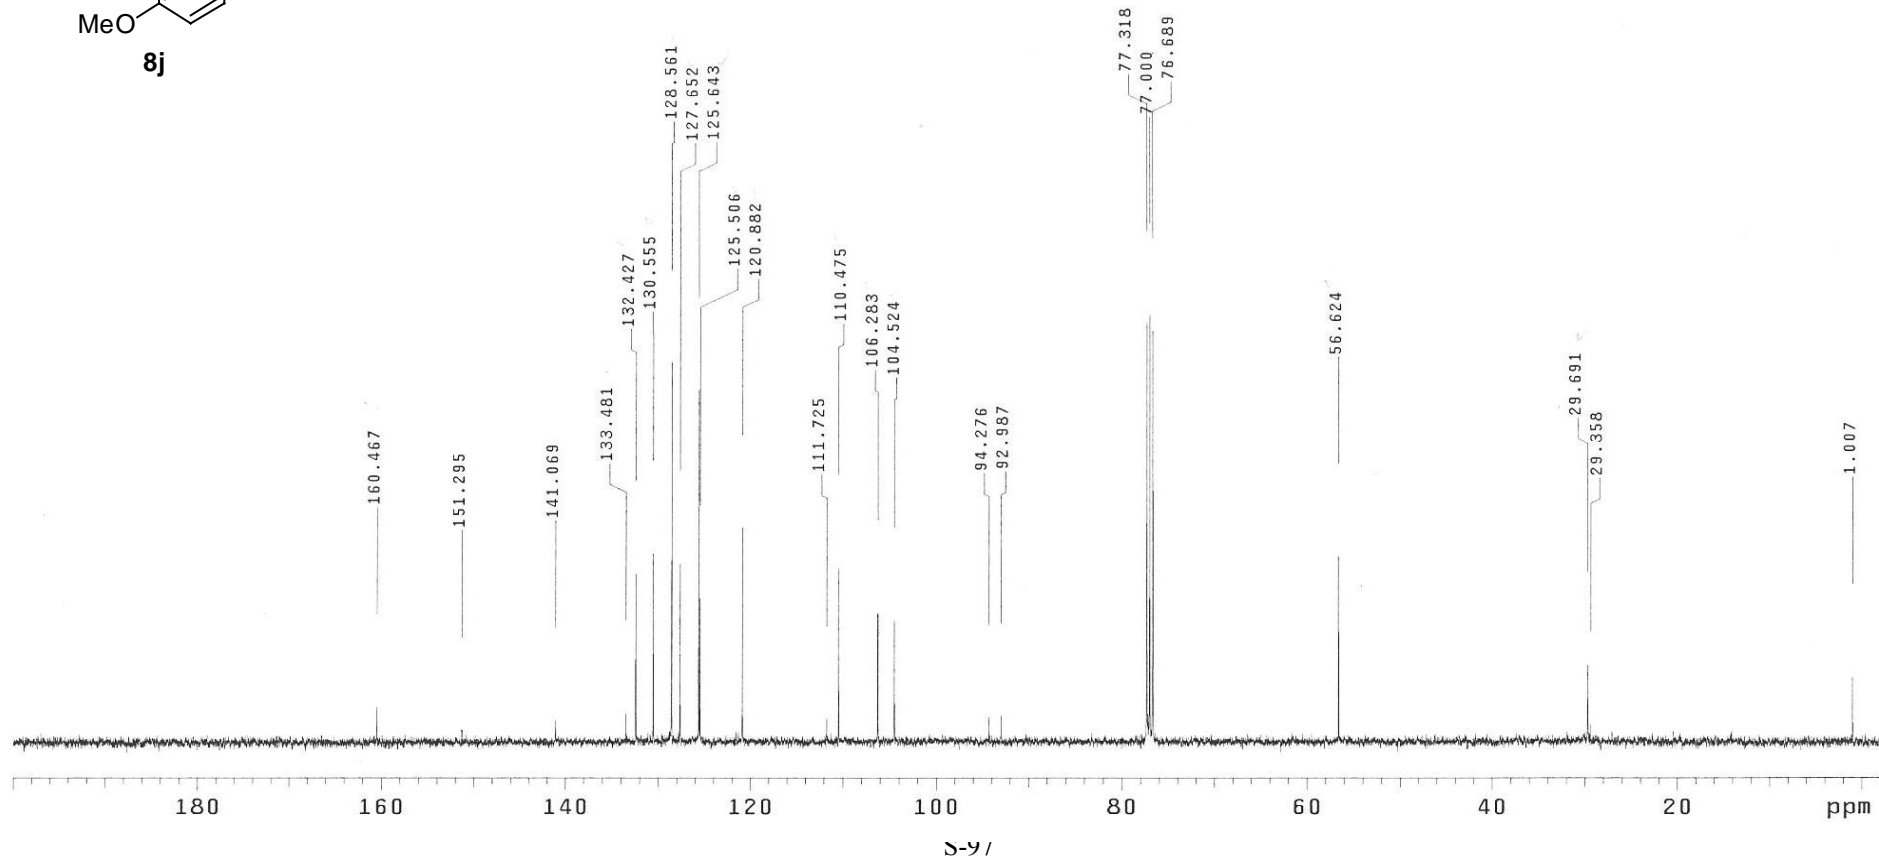

WHC-070

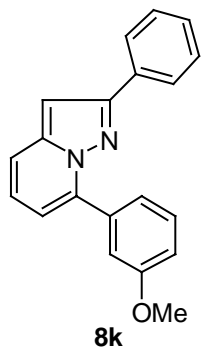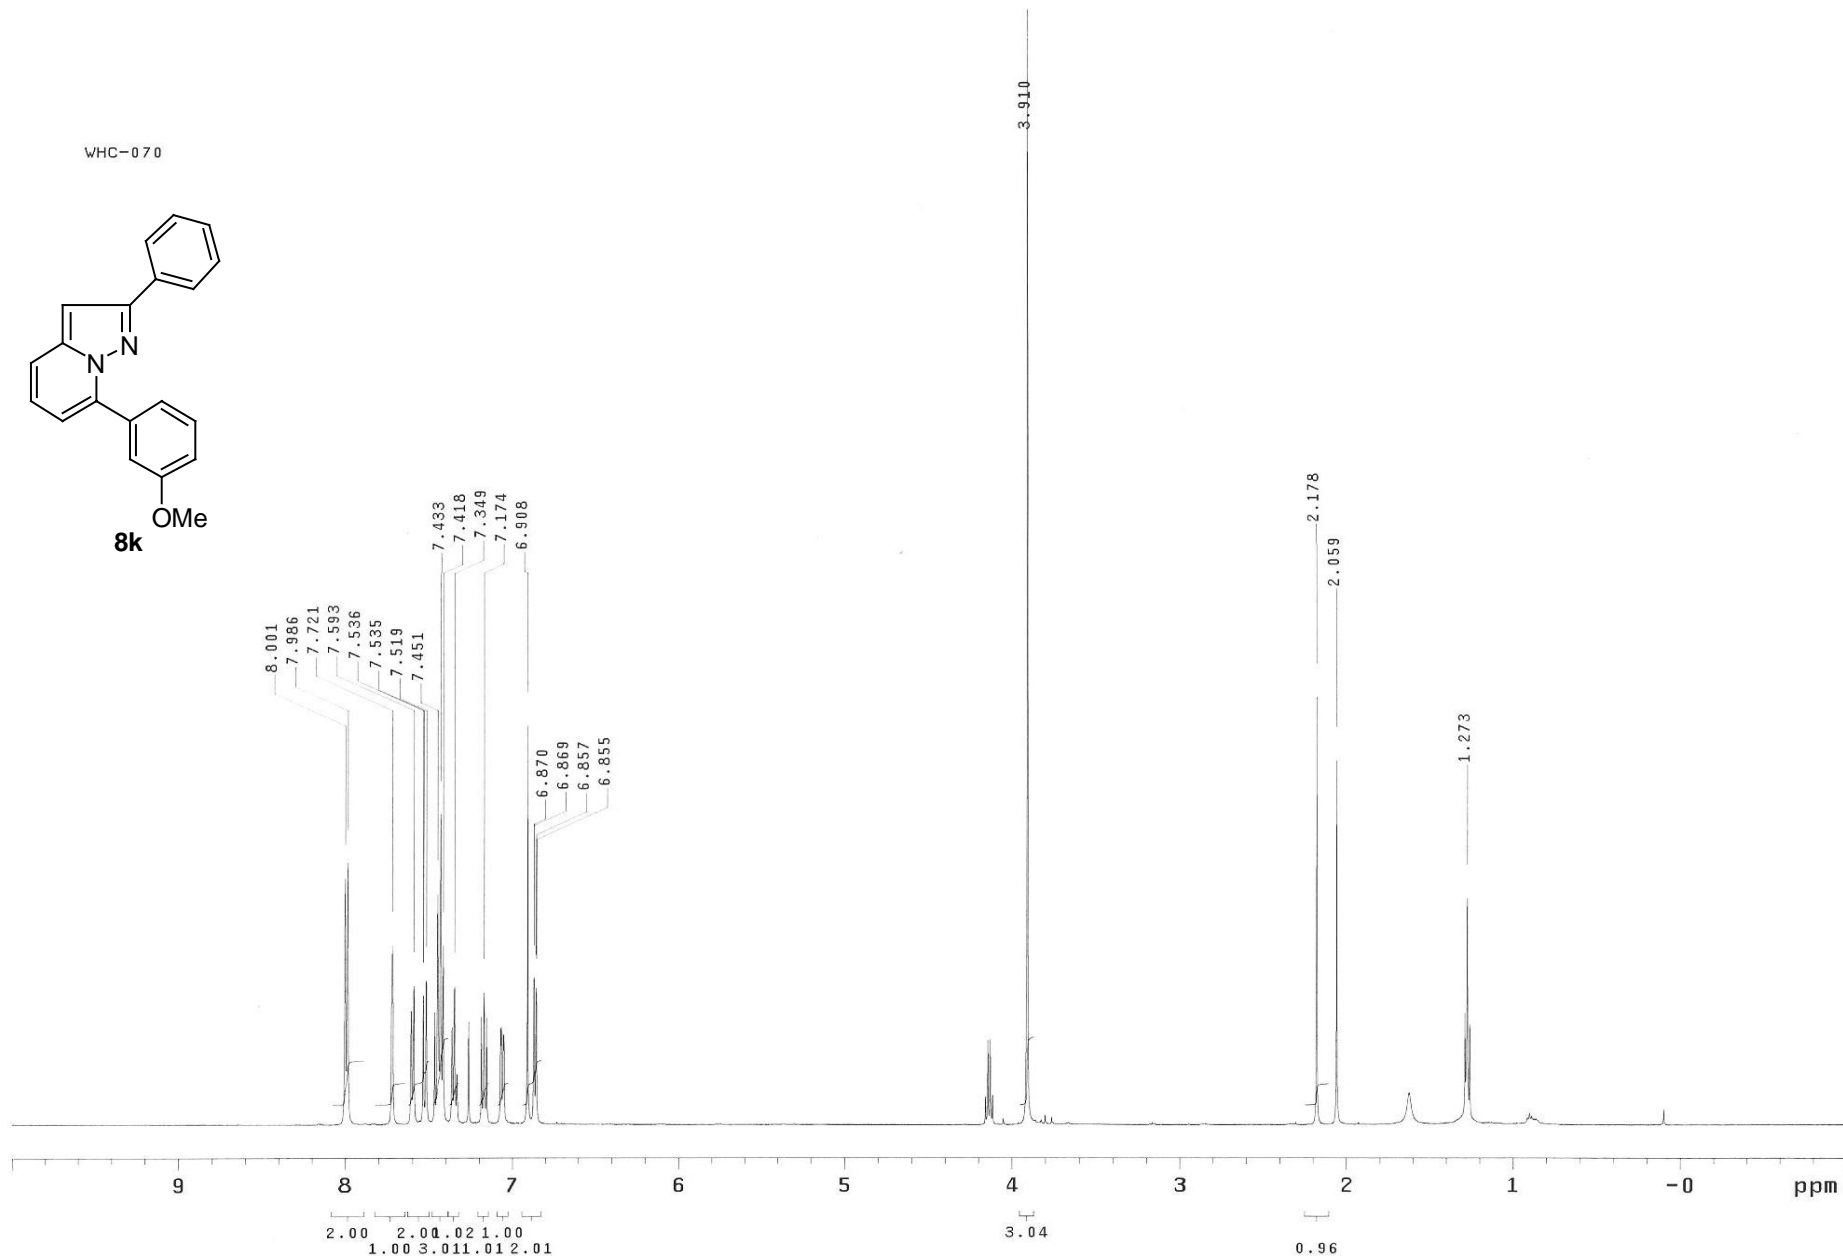

WHC-070

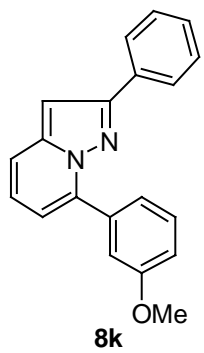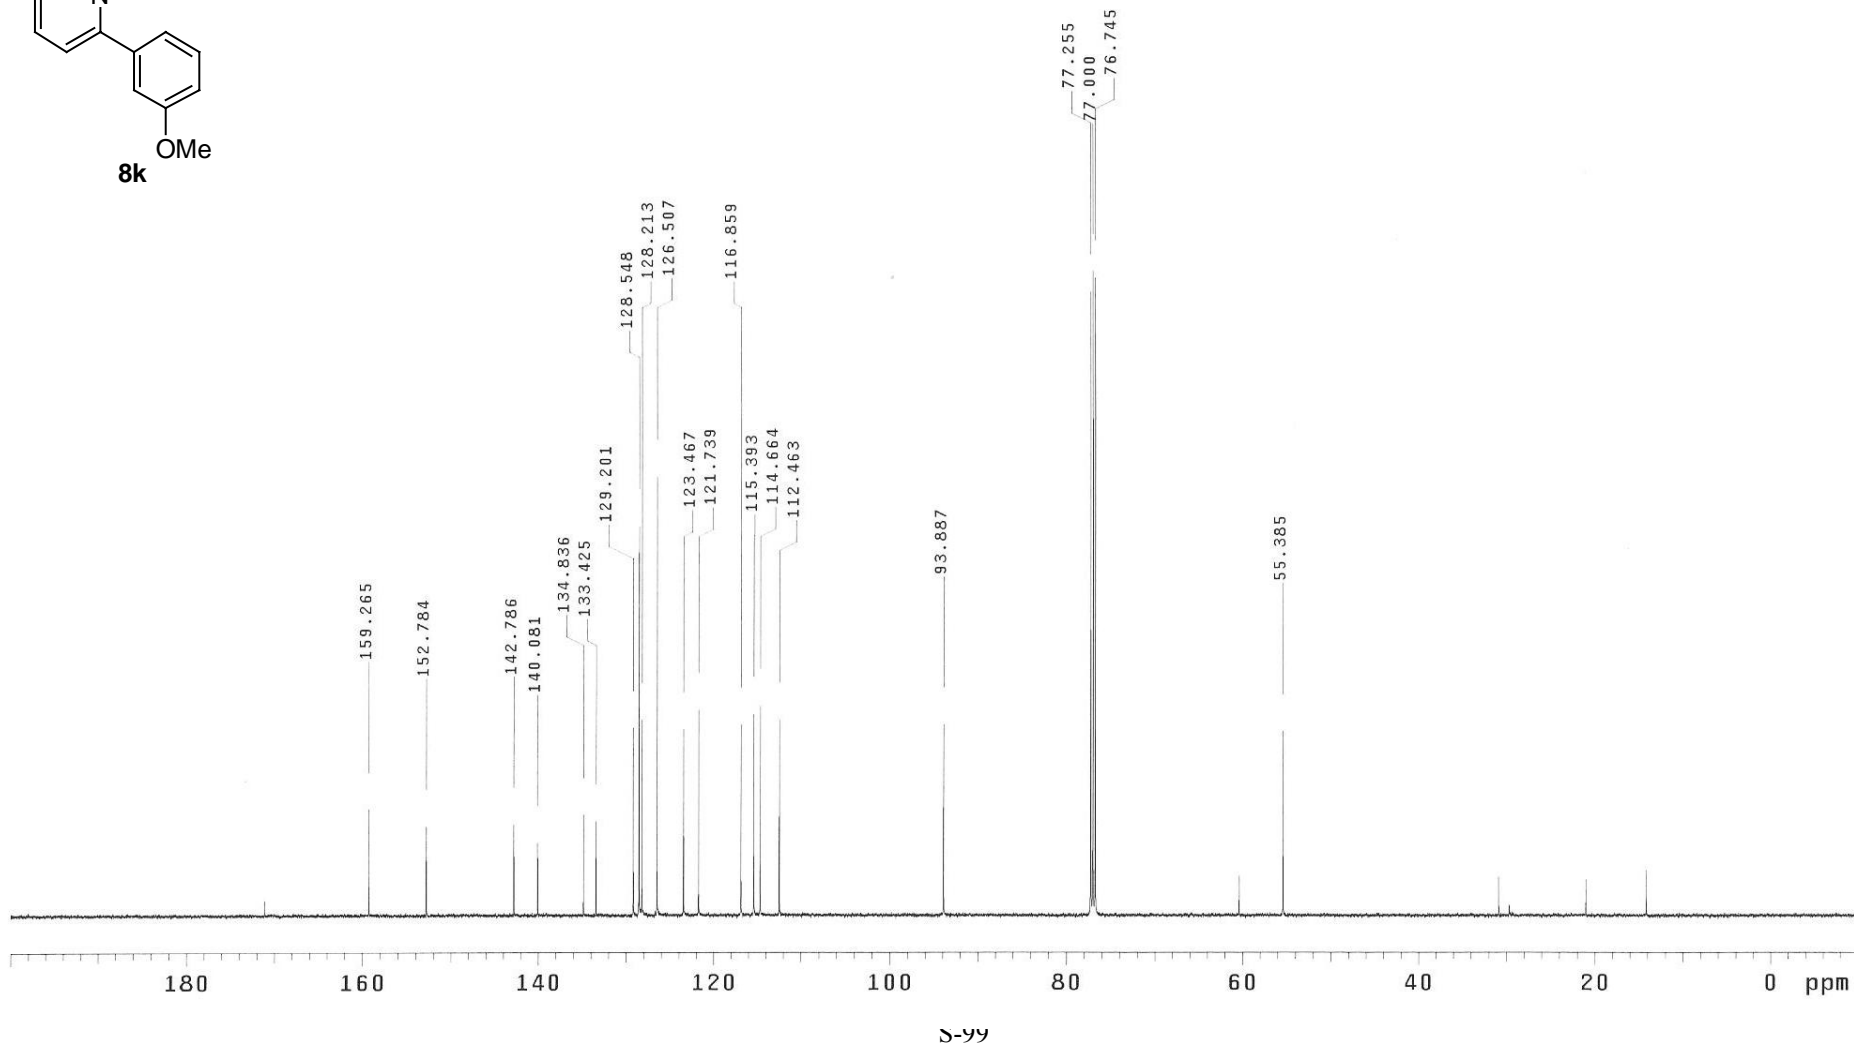

WHJ-221

Mercury-400BB "Mercuryplus400"

Date: Apr 17 2008

Solvent: CDCl3

Ambient temperature

Total 48 repetitions

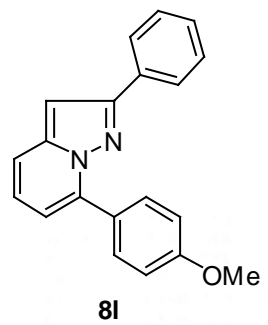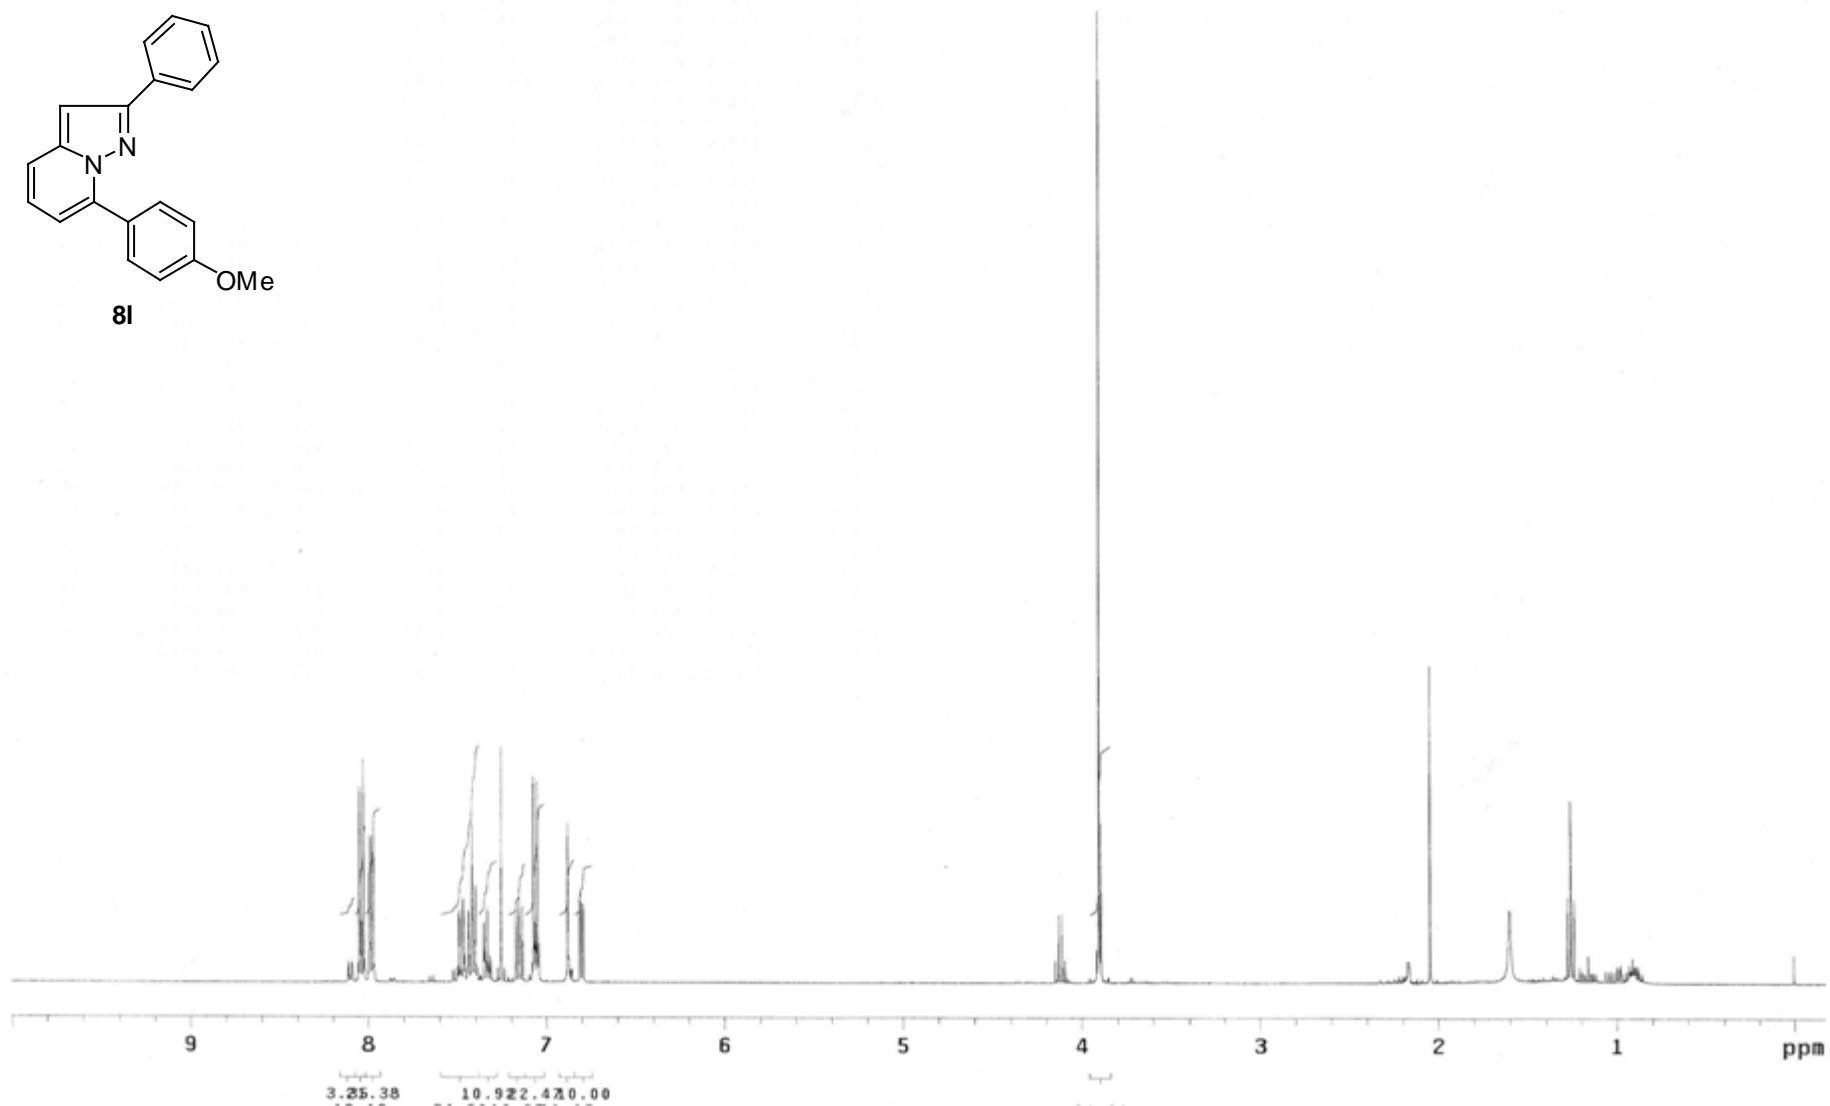

S-100

WHJ-221

Mercury-400BB "Mercuryplus400"  
Date: Apr 17 2008  
Solvent: CDCl3  
Ambient temperature  
Total 32000 repetitions

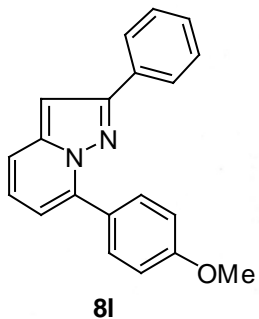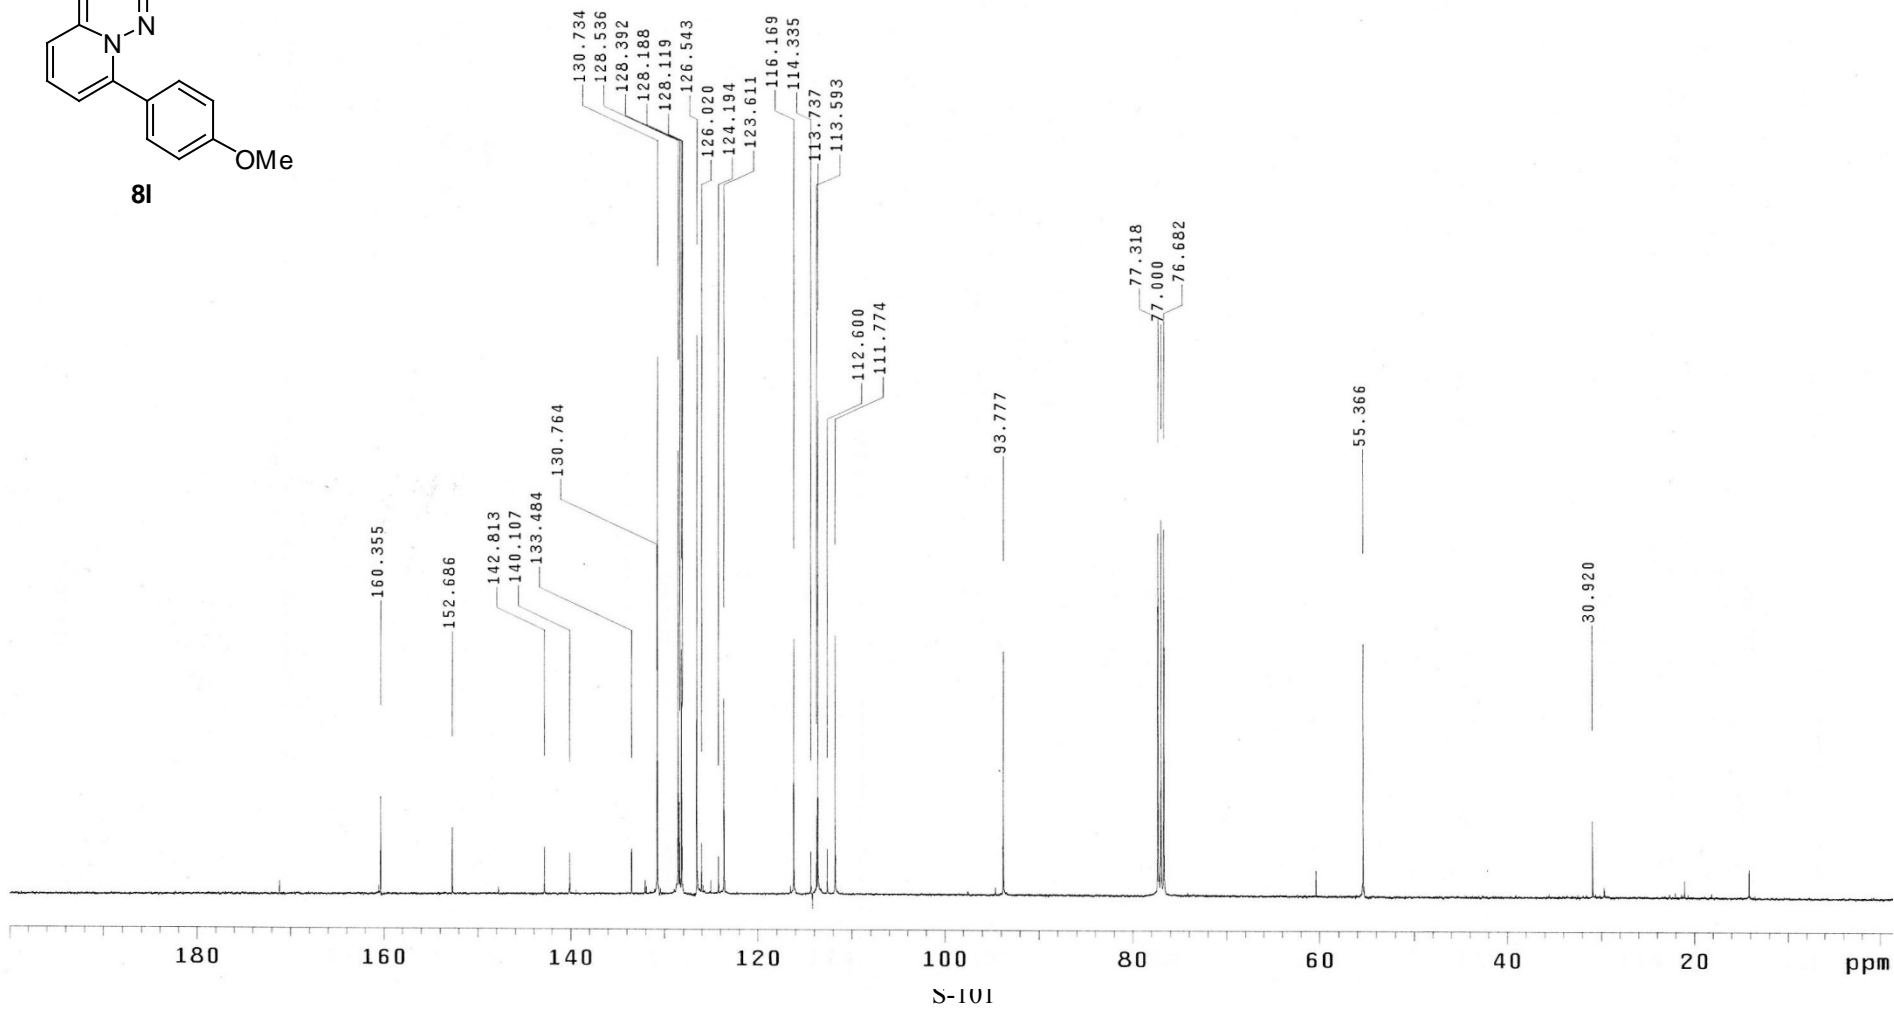

WHC-101

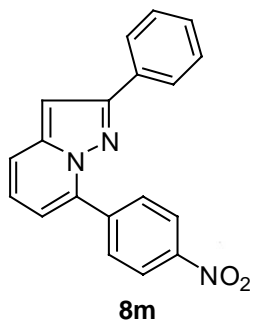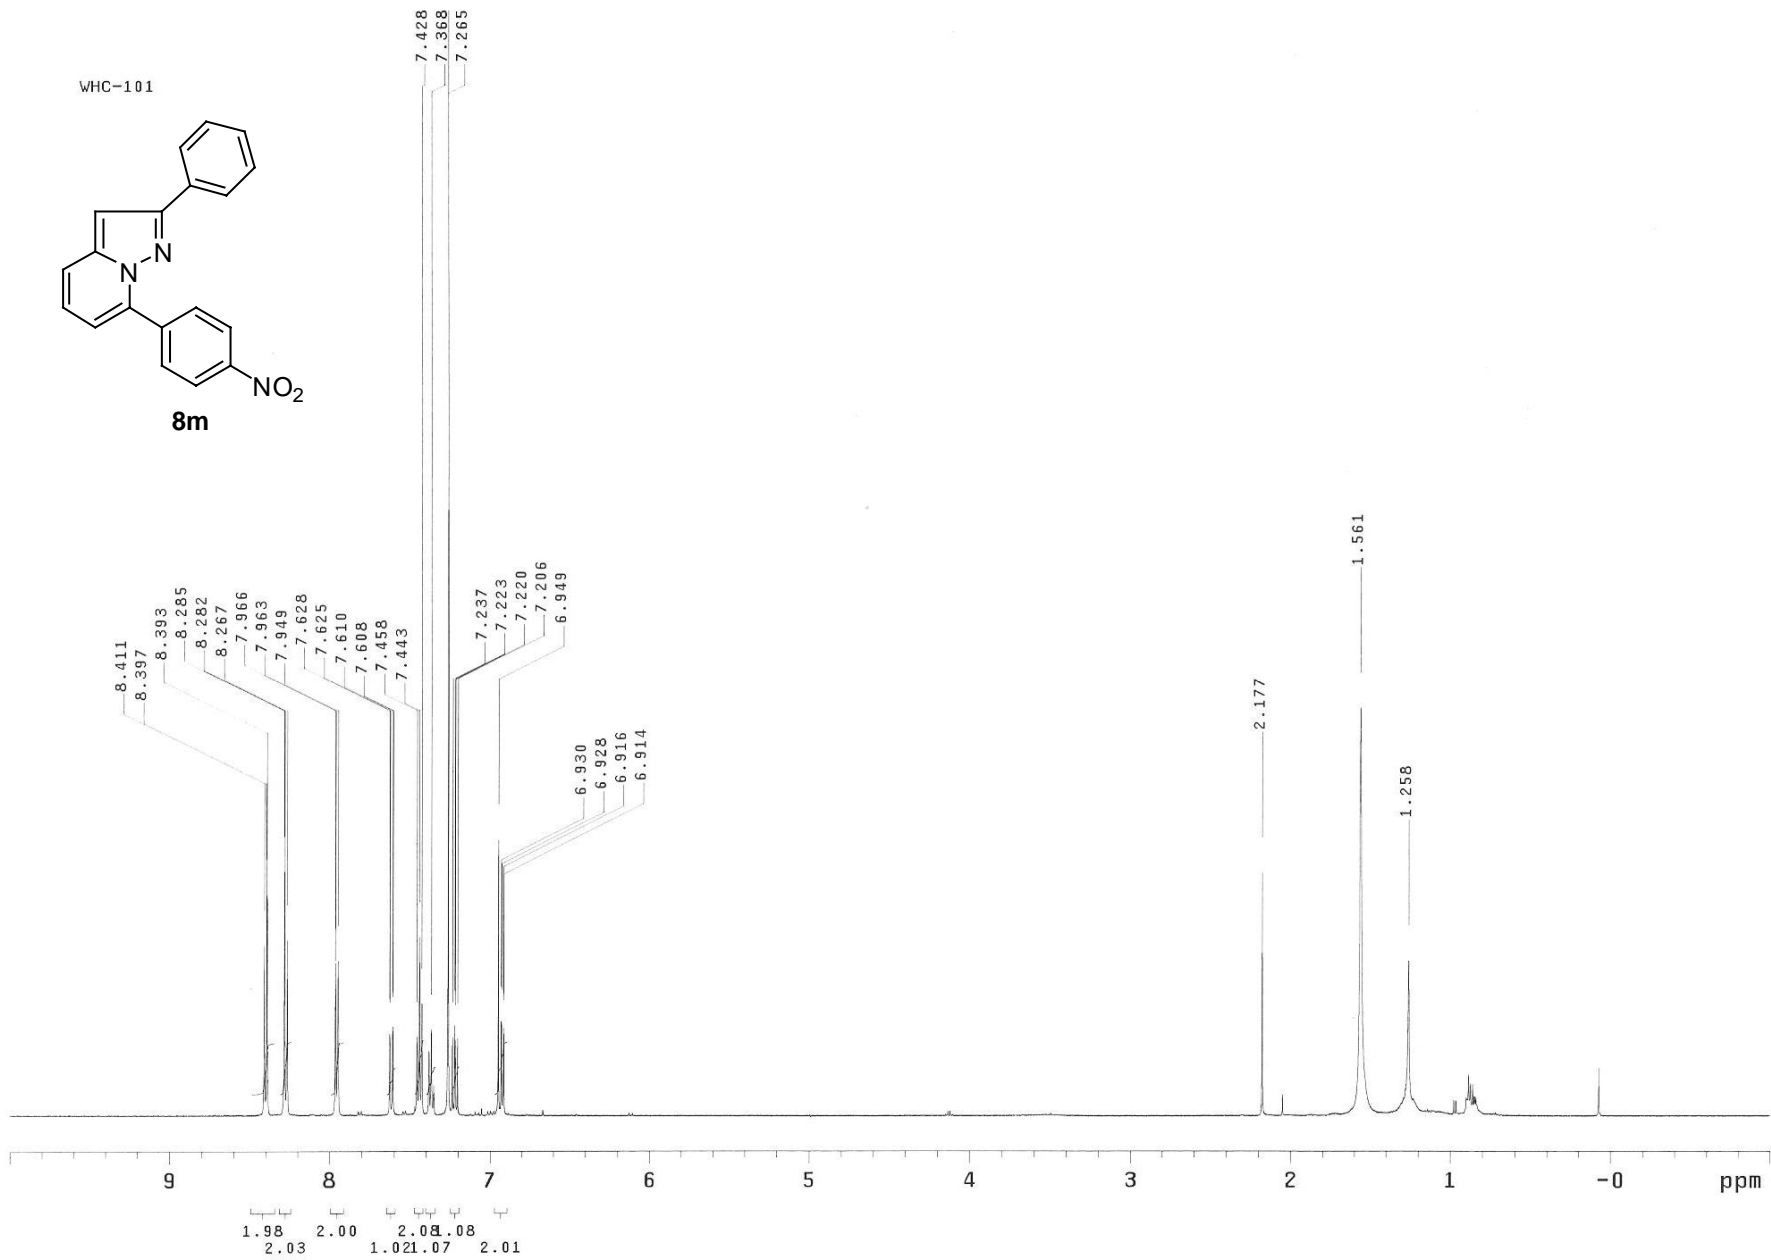

WHC-101

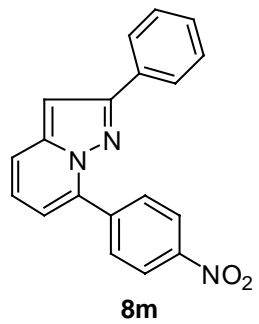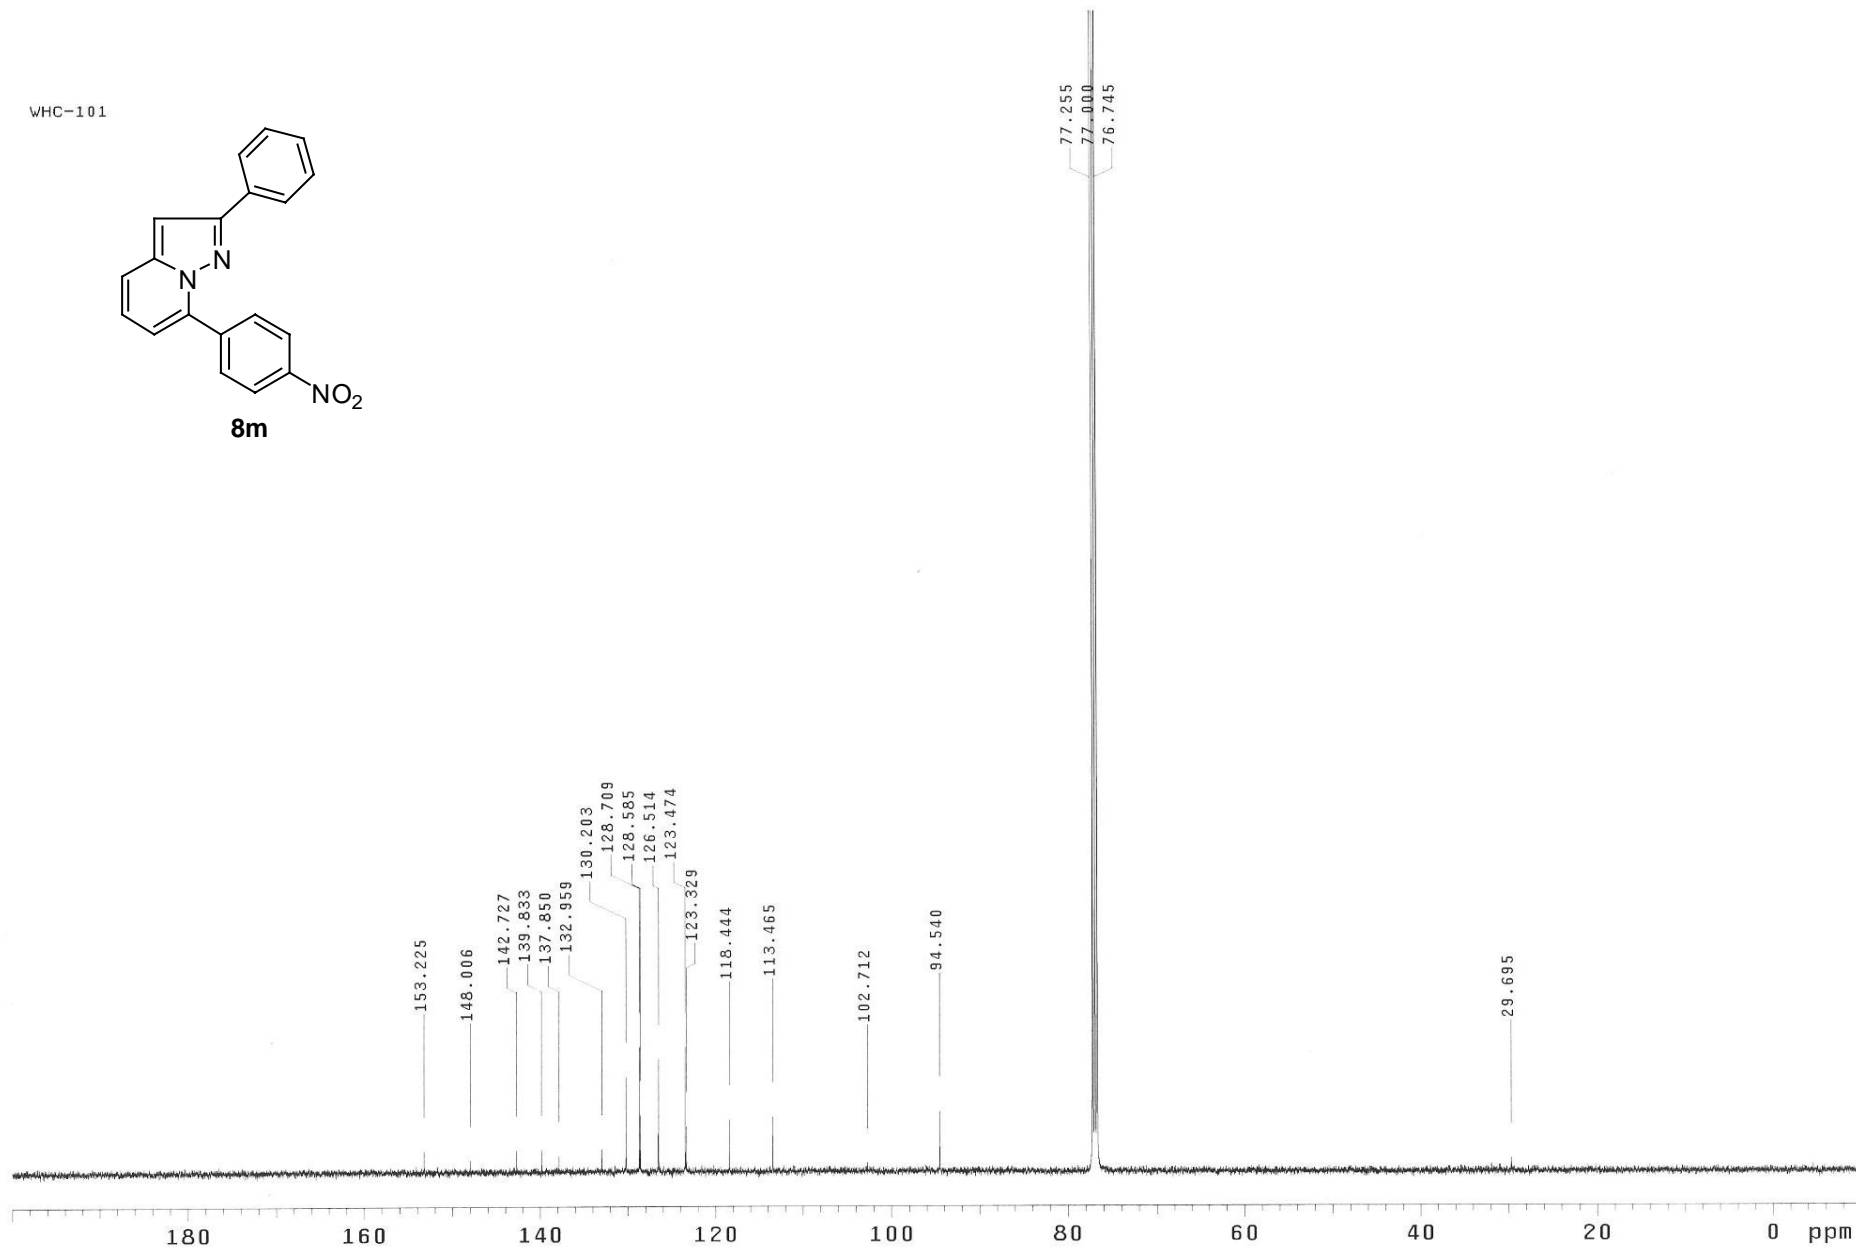

S-103



WHC-114

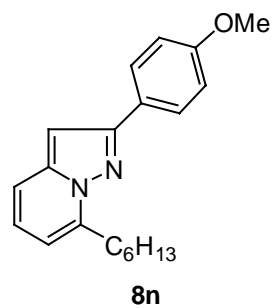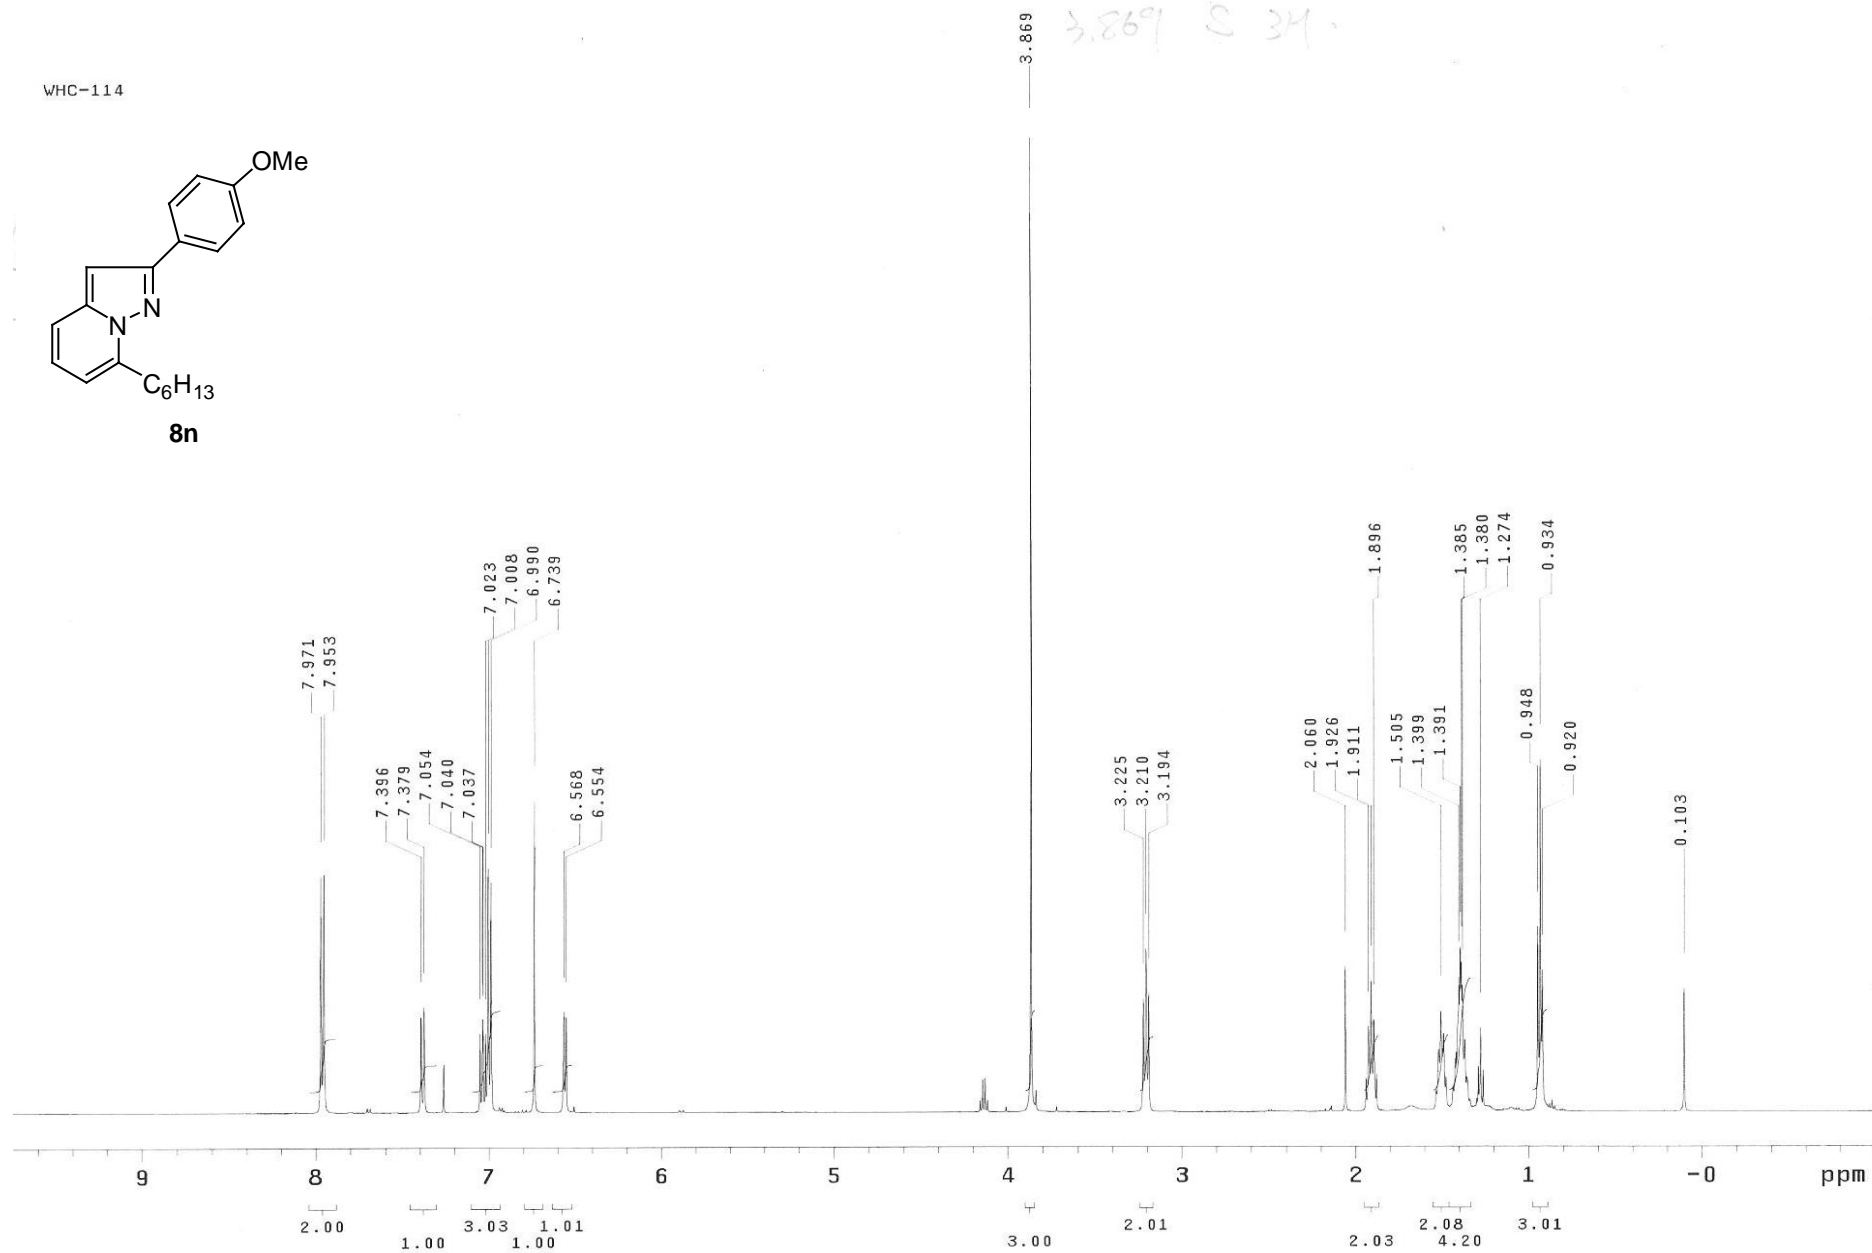

S-104

WHC-114

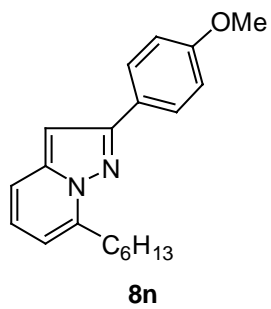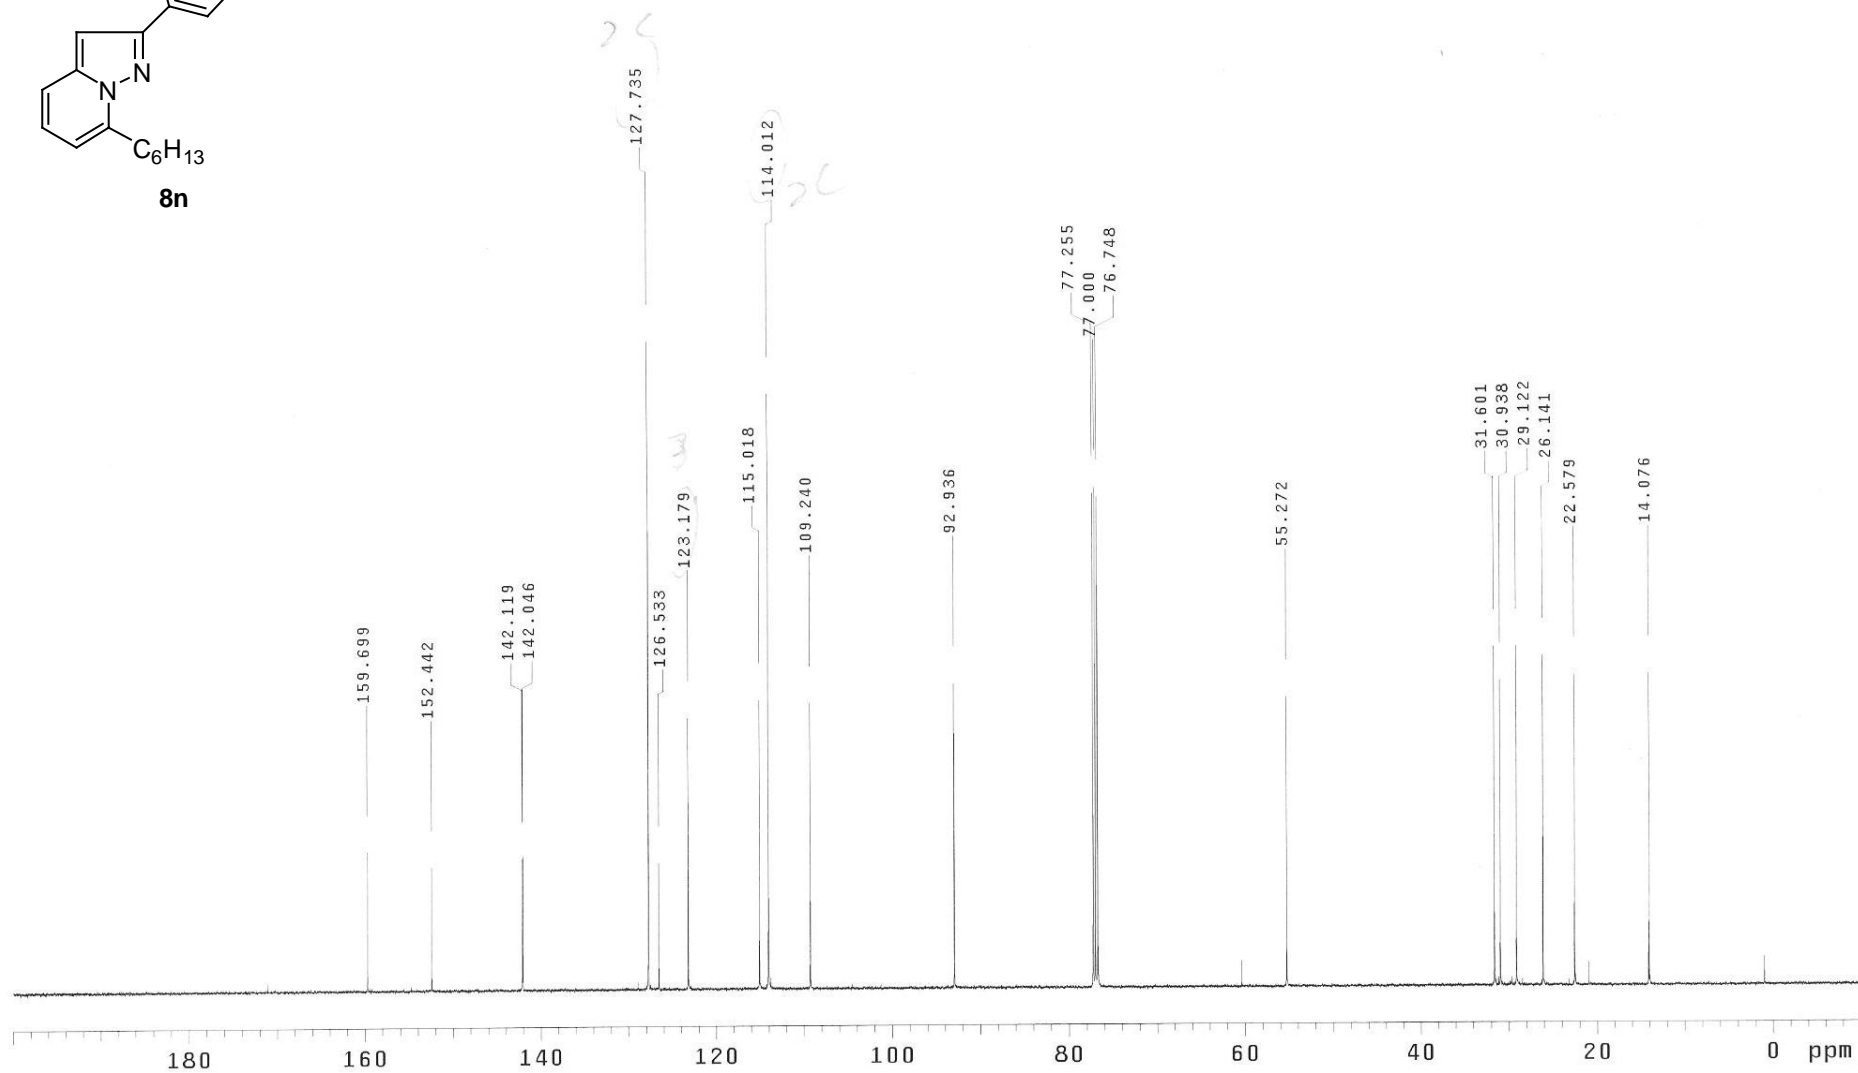

S-105

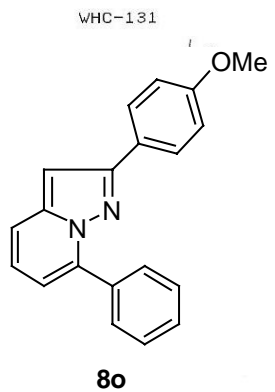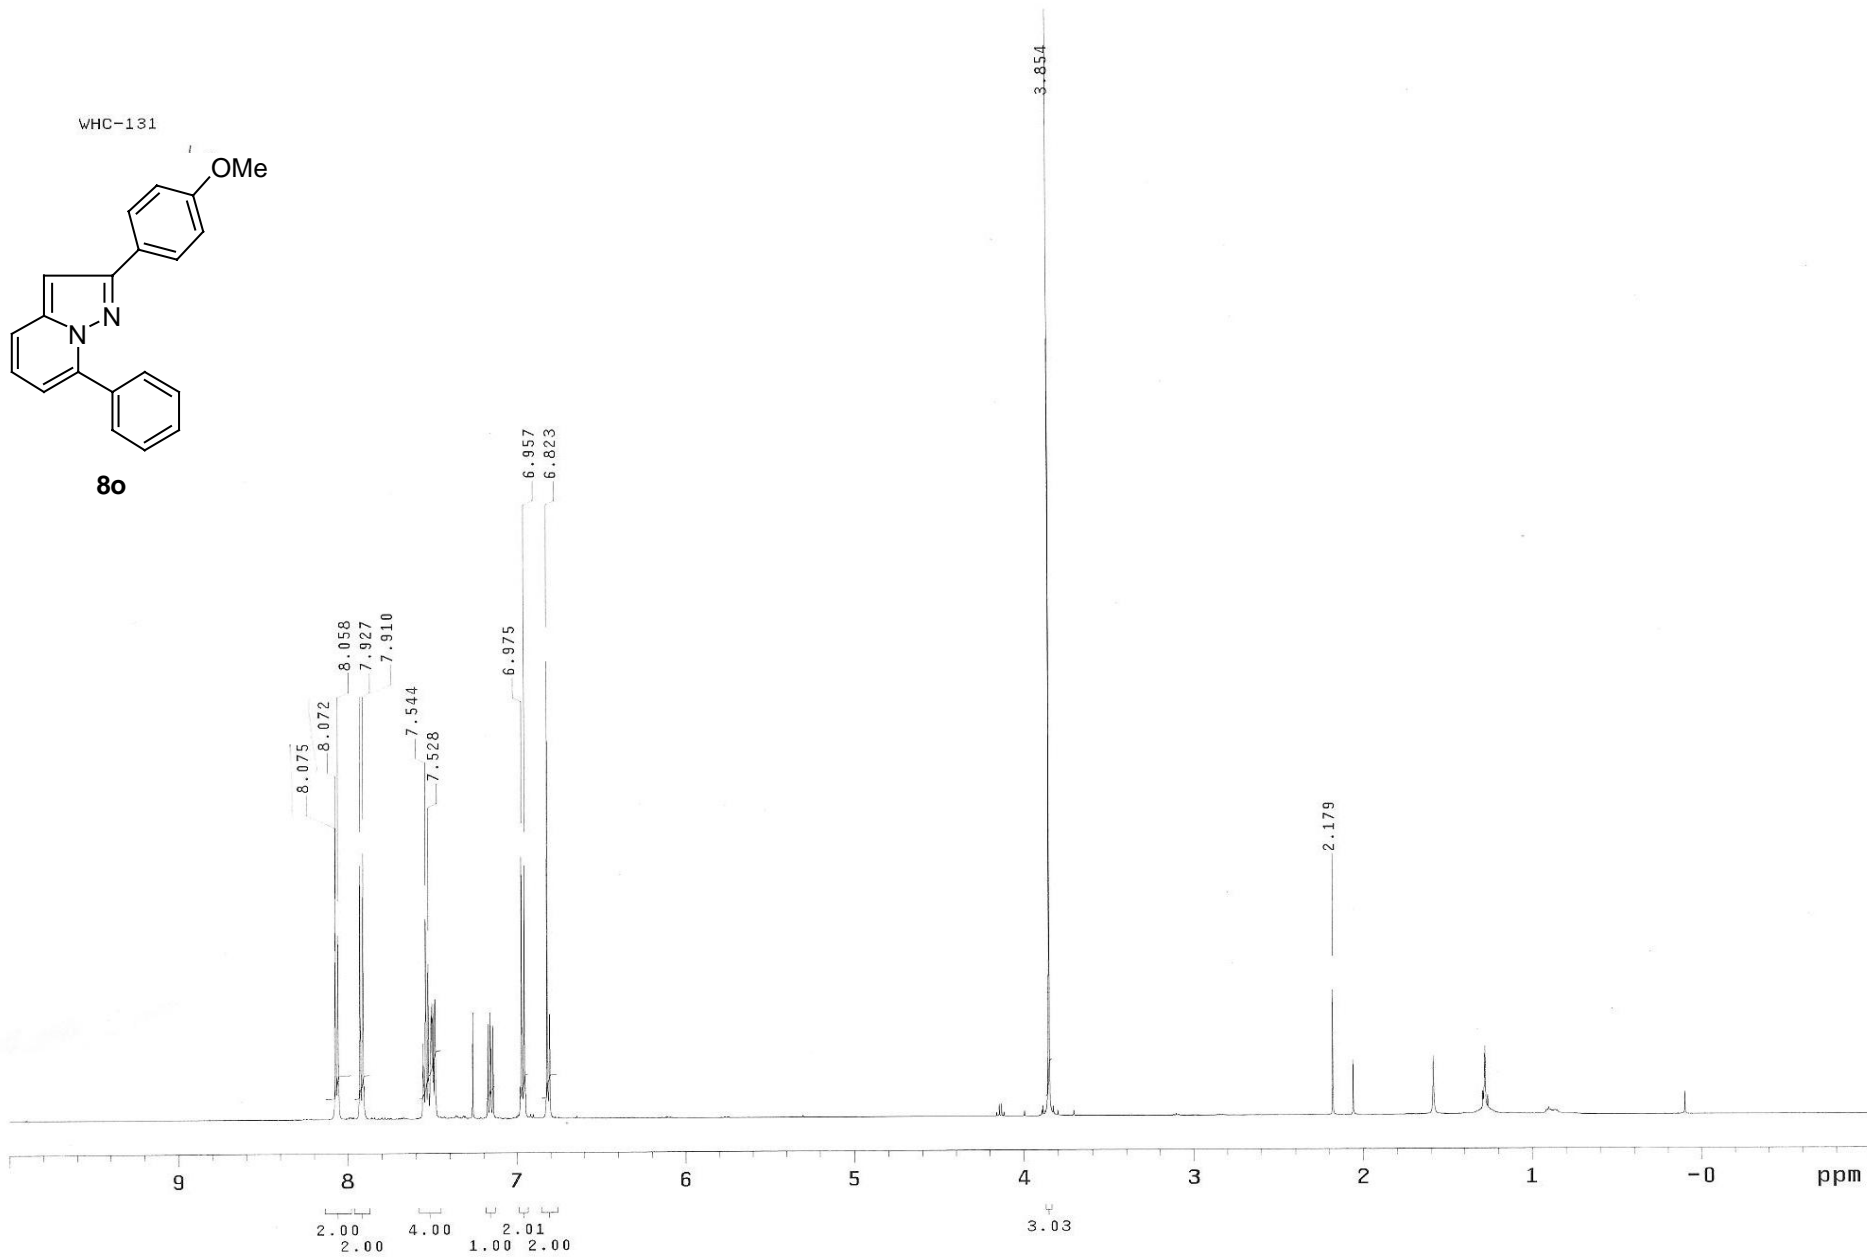

WHC-131

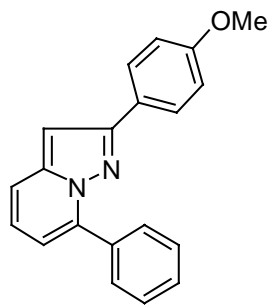

**8o**

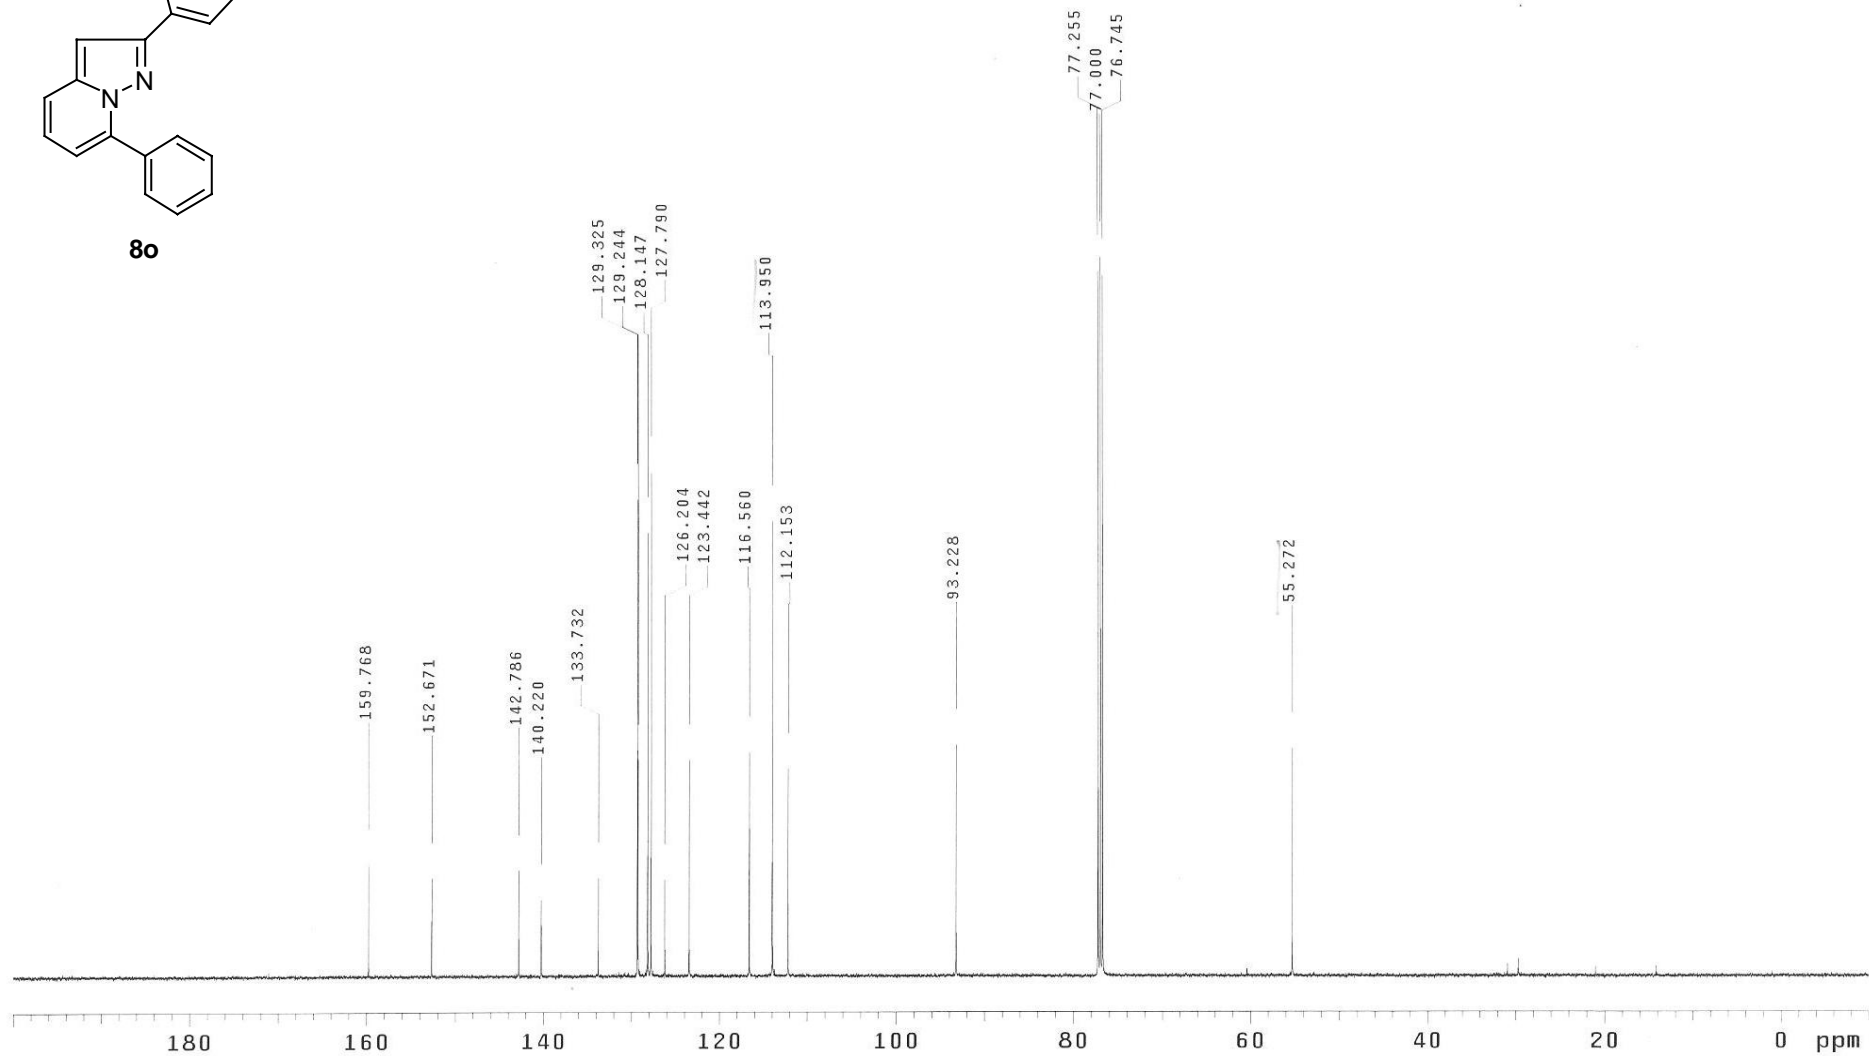

WHC-120

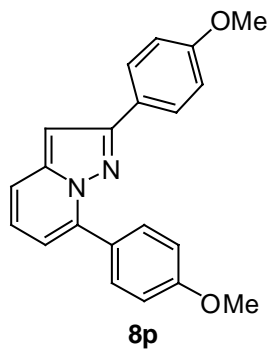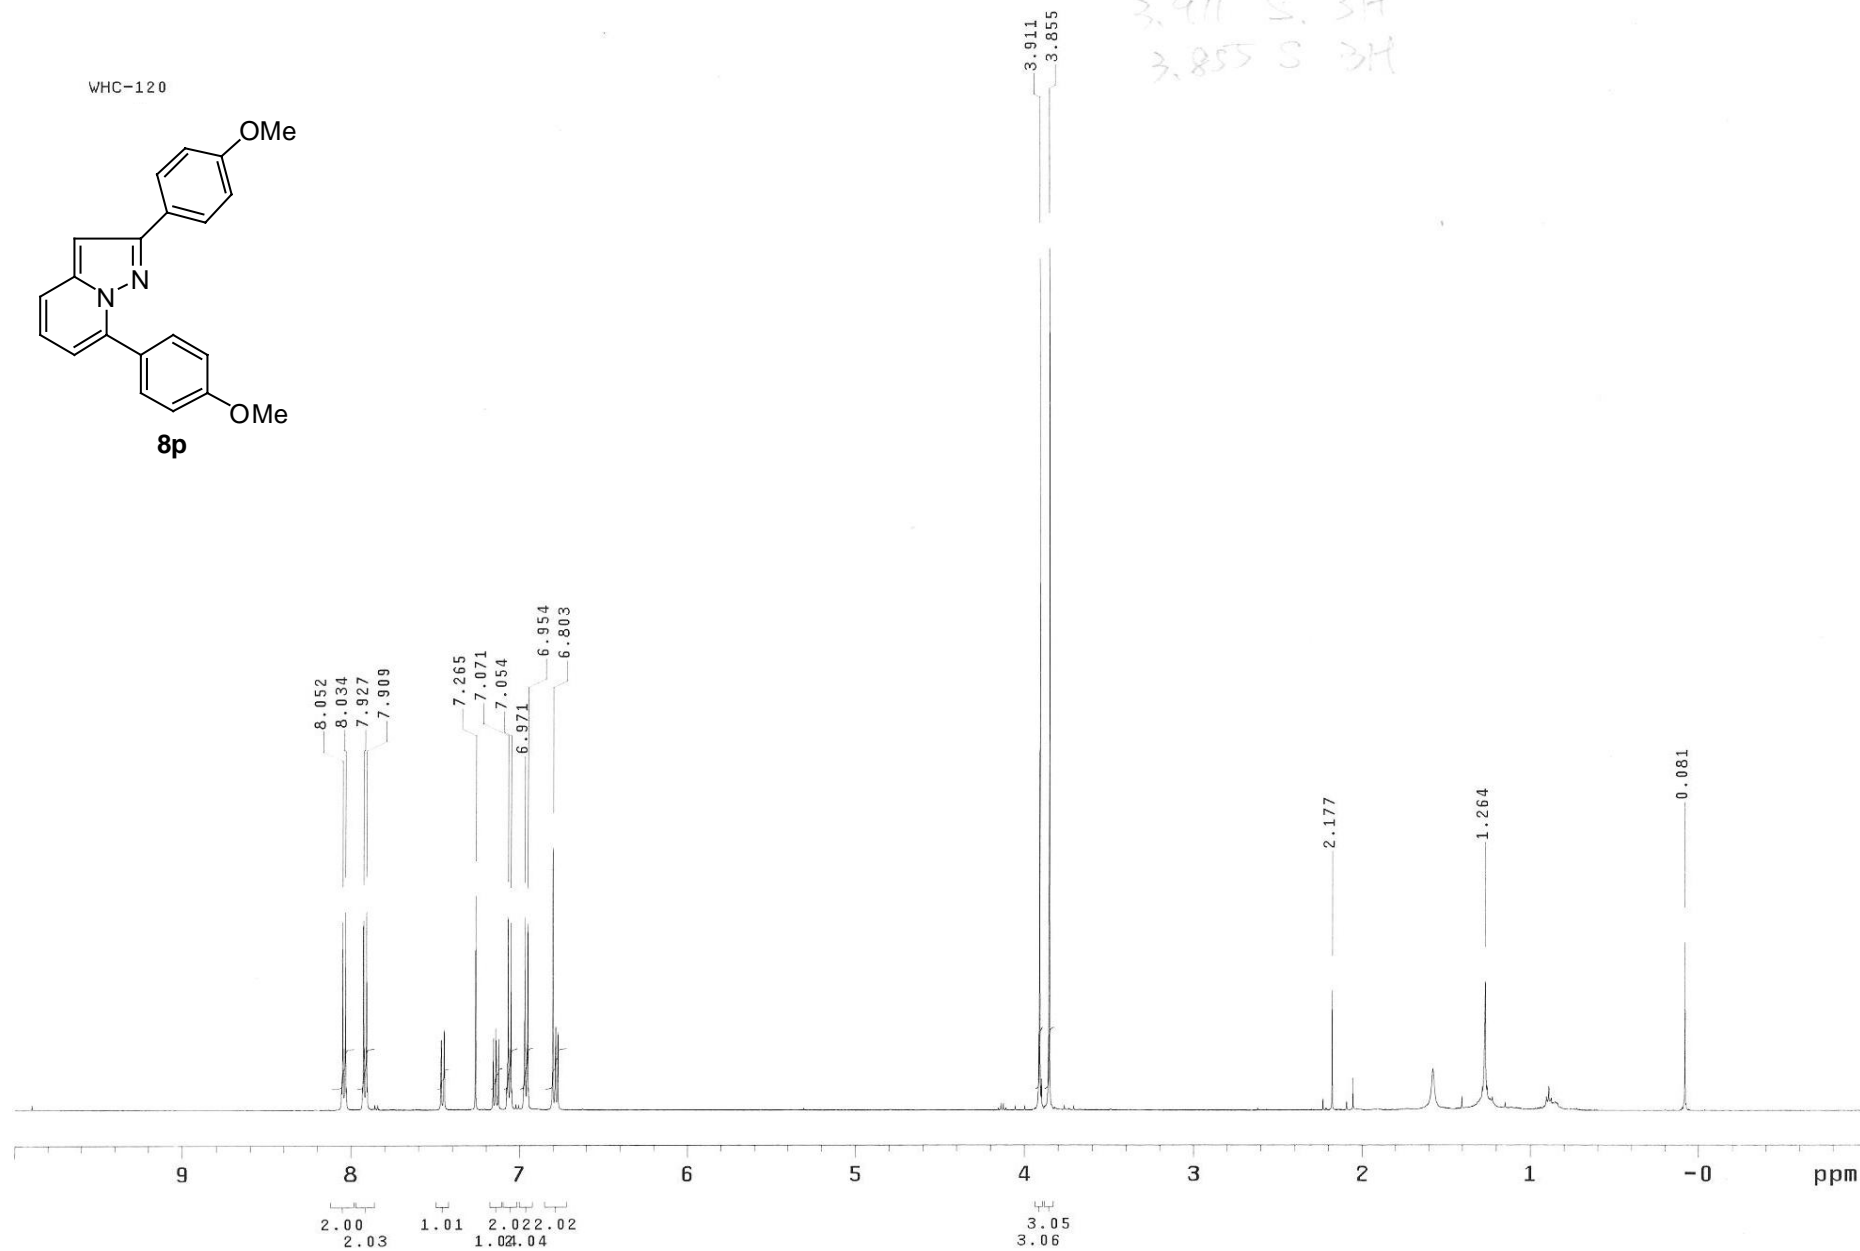

S-108

WHC-120

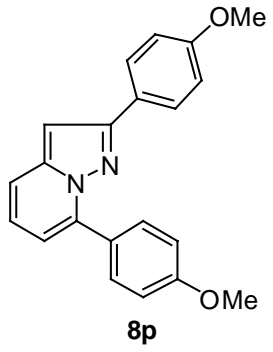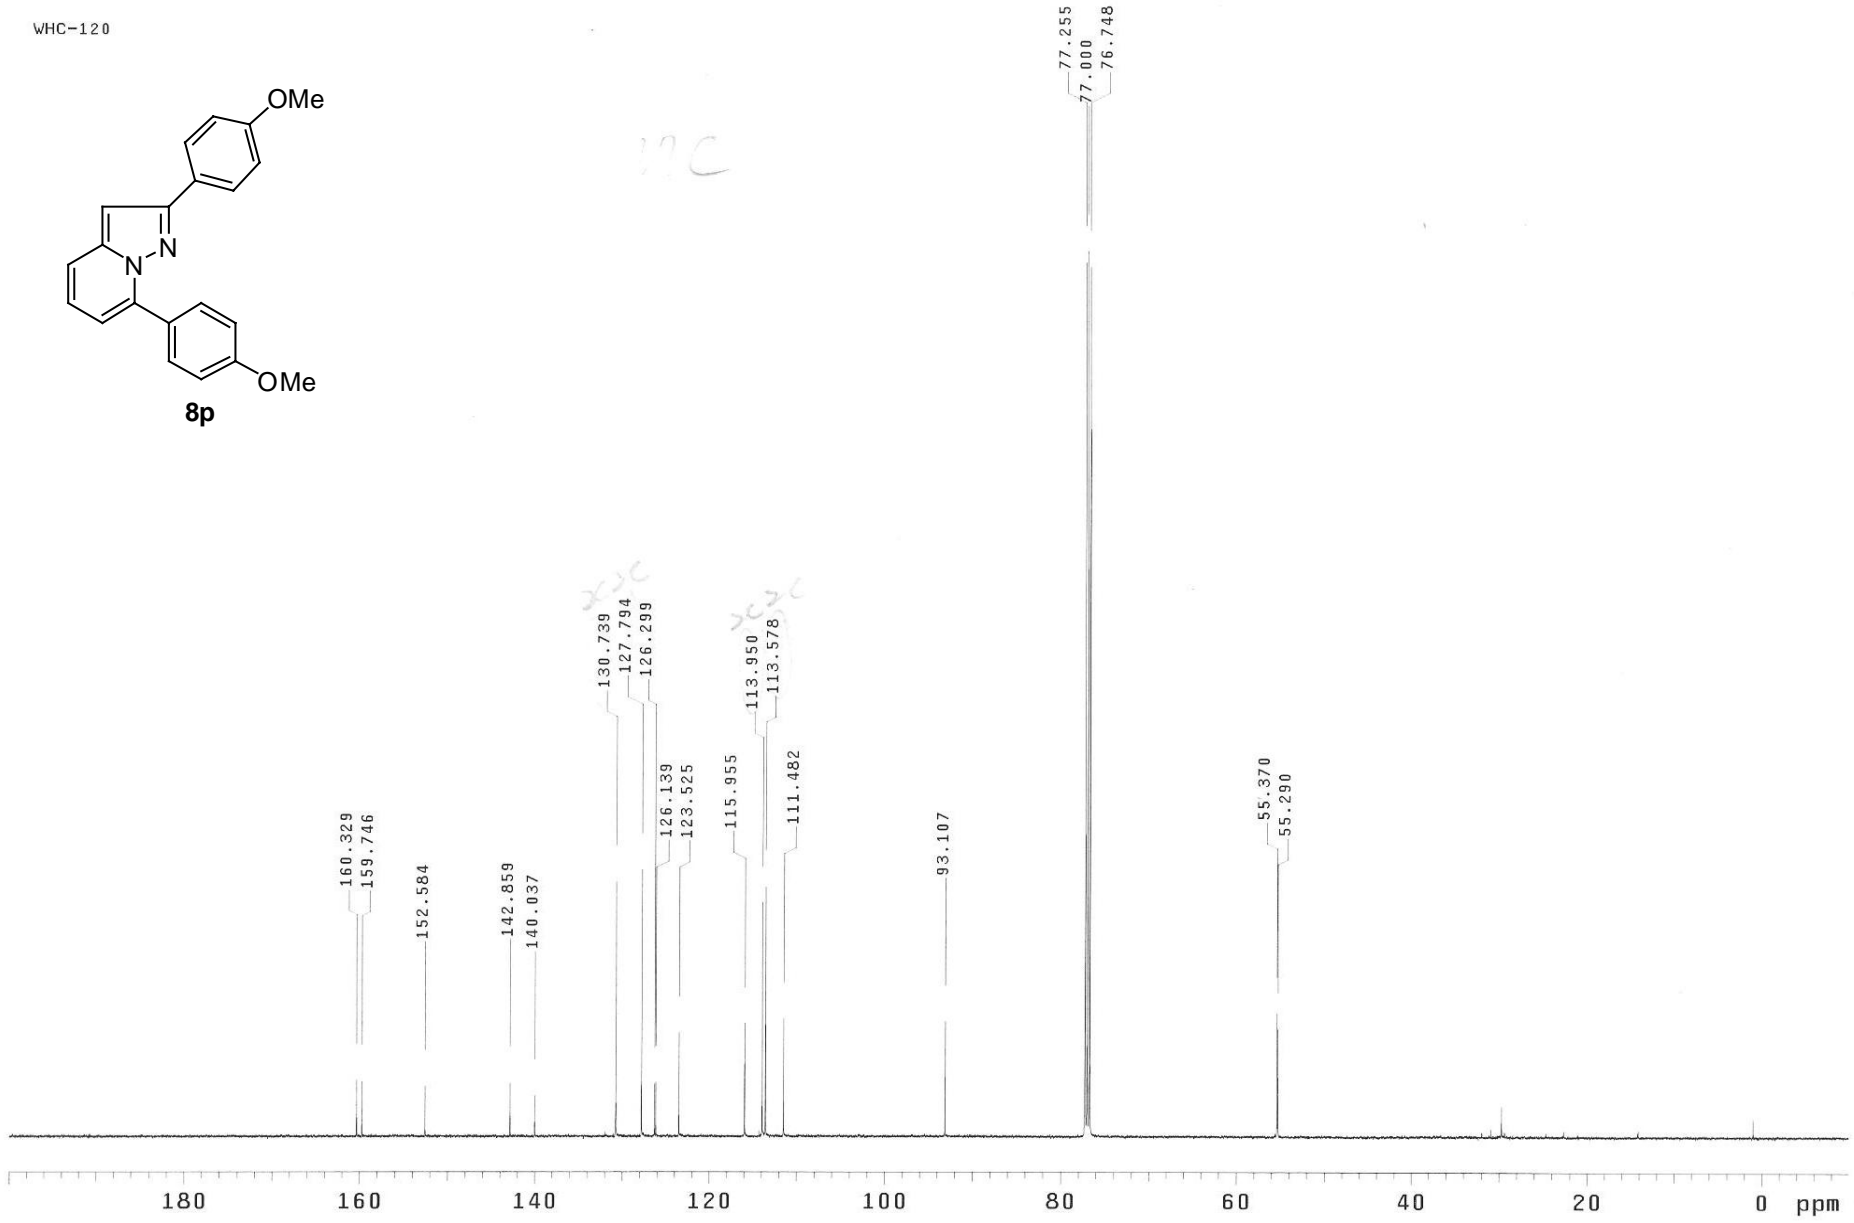

WHC-119

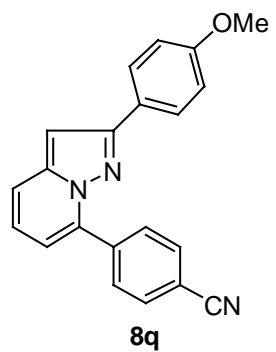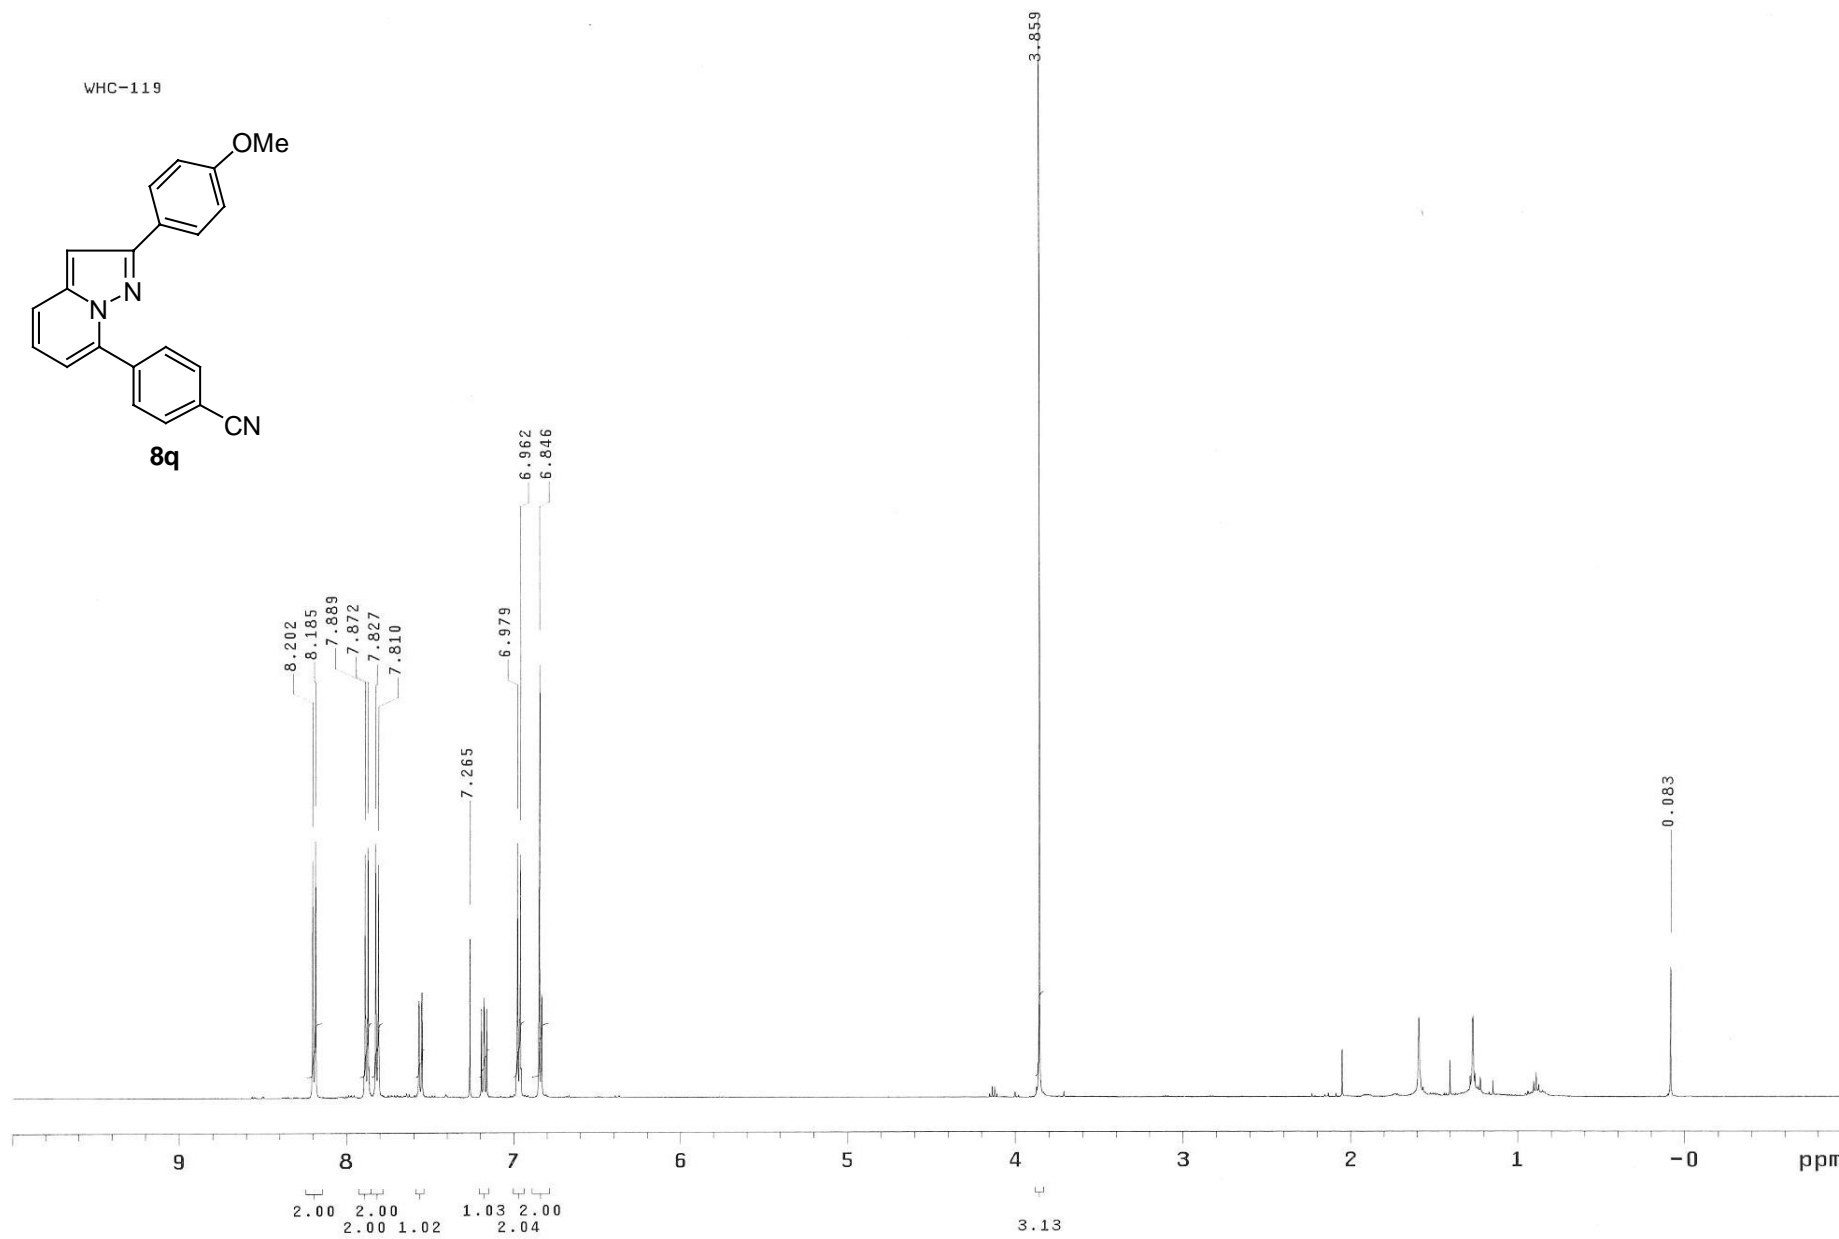

WHC-119

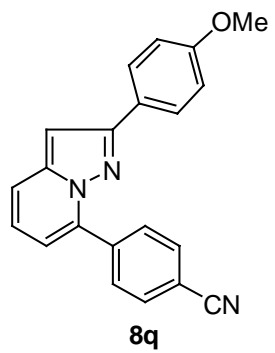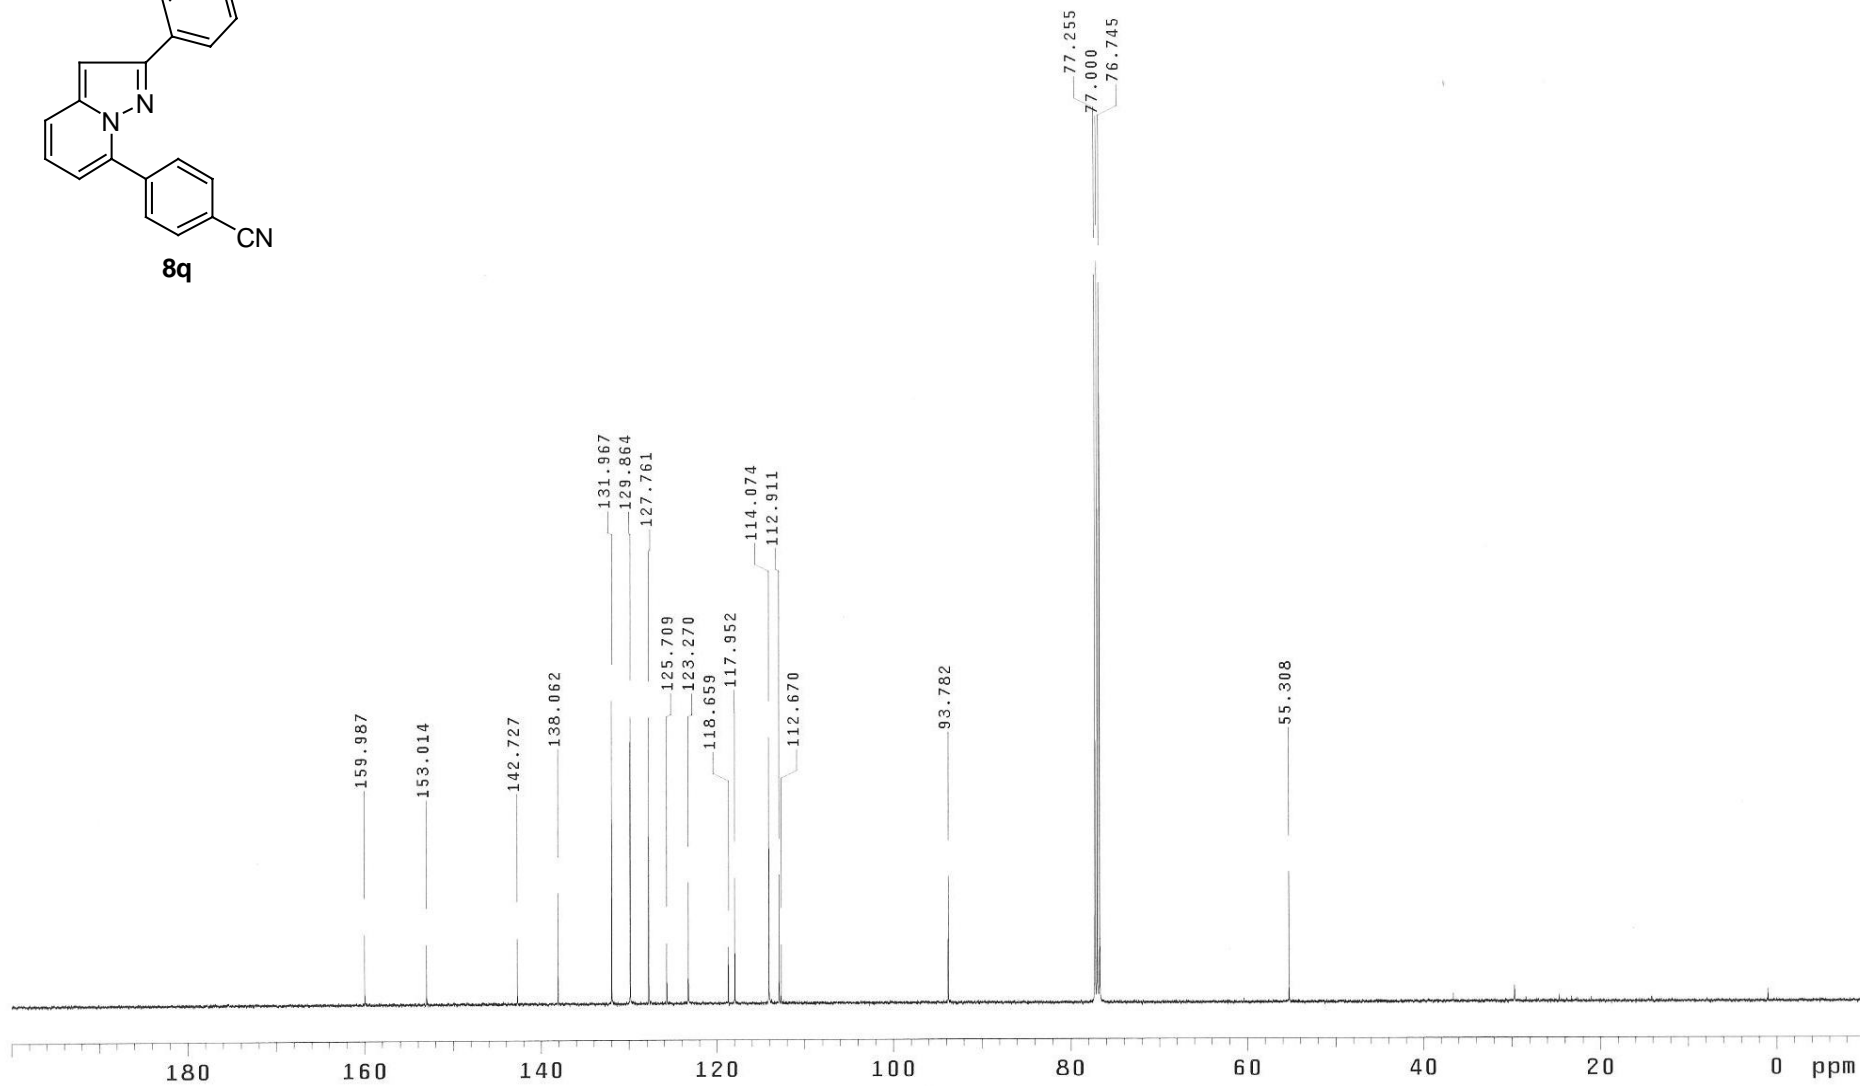



WHC-132T2

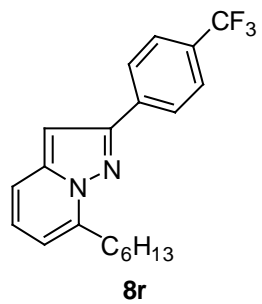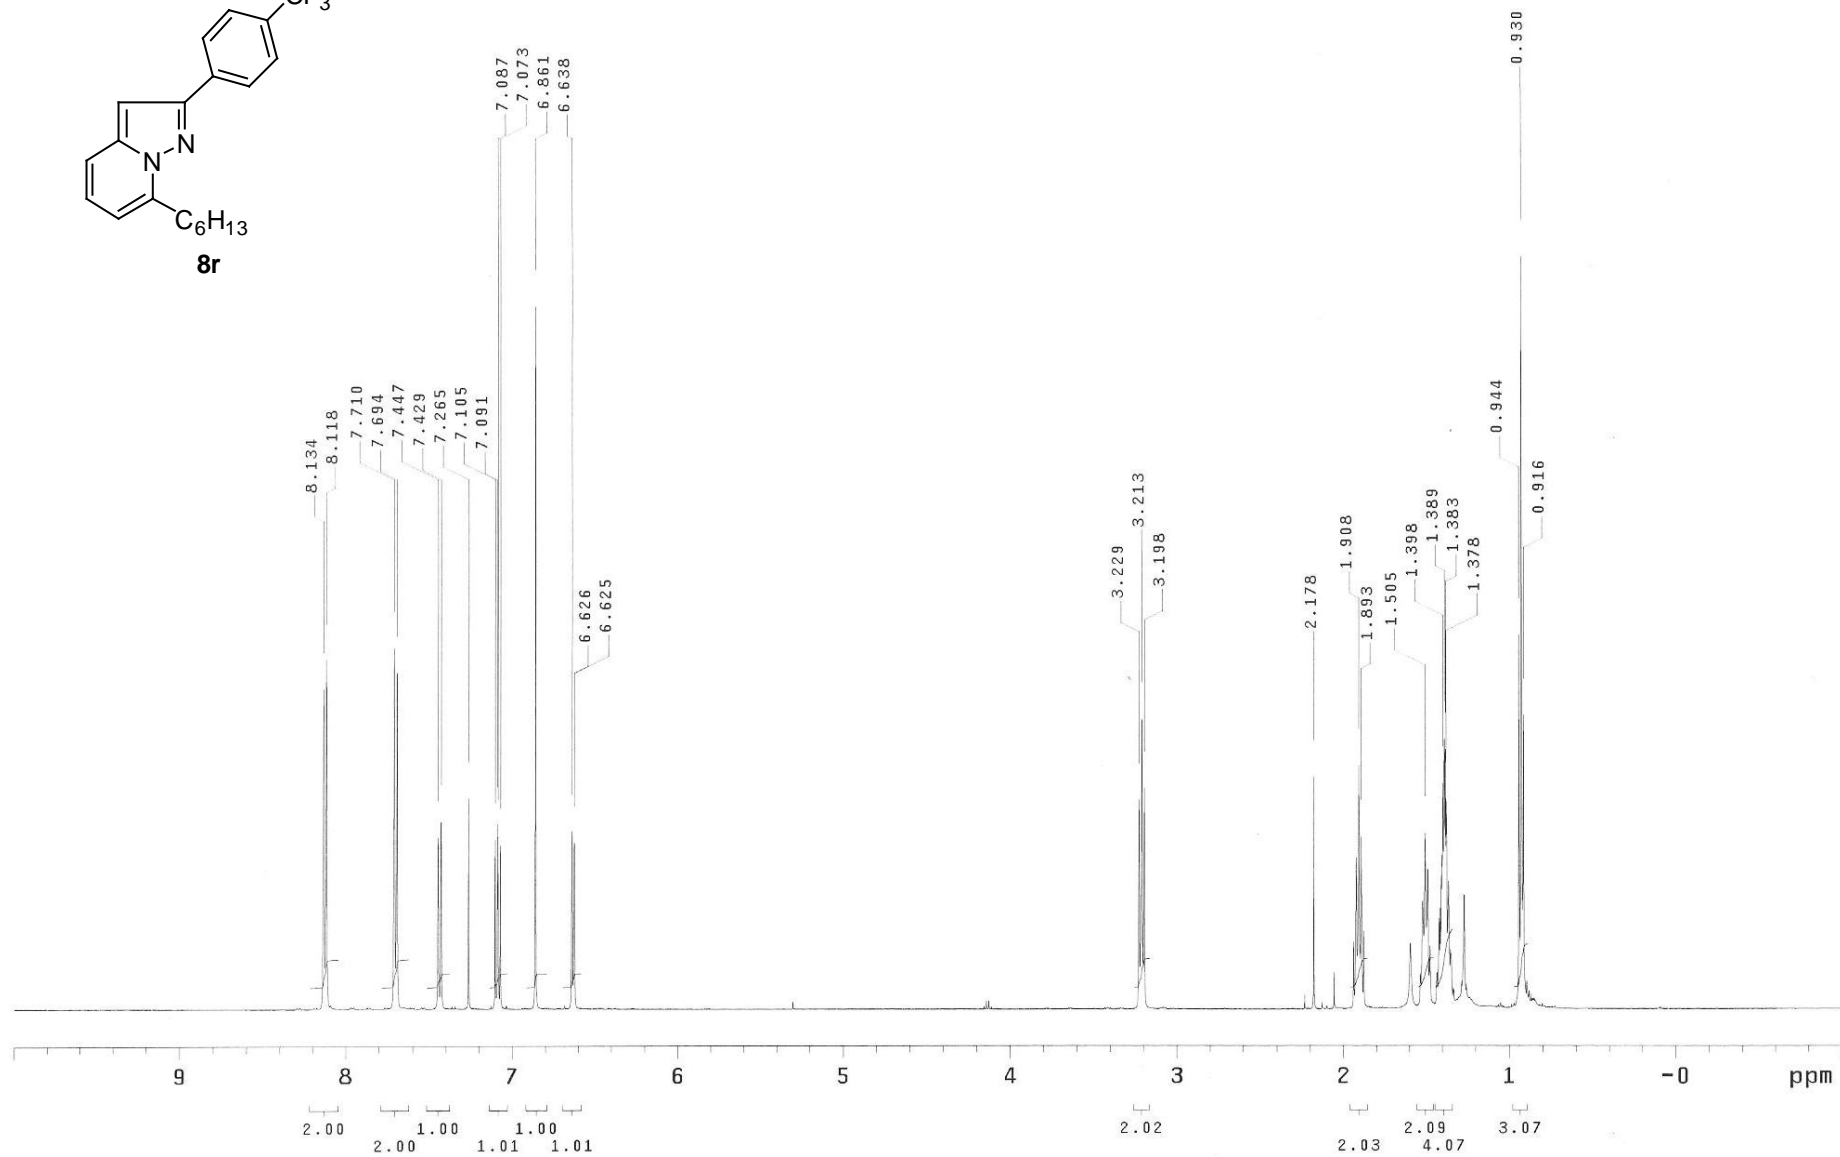

WHC-132T2

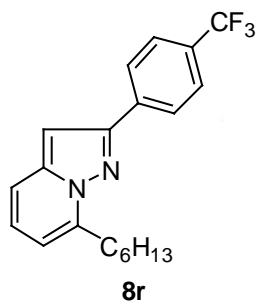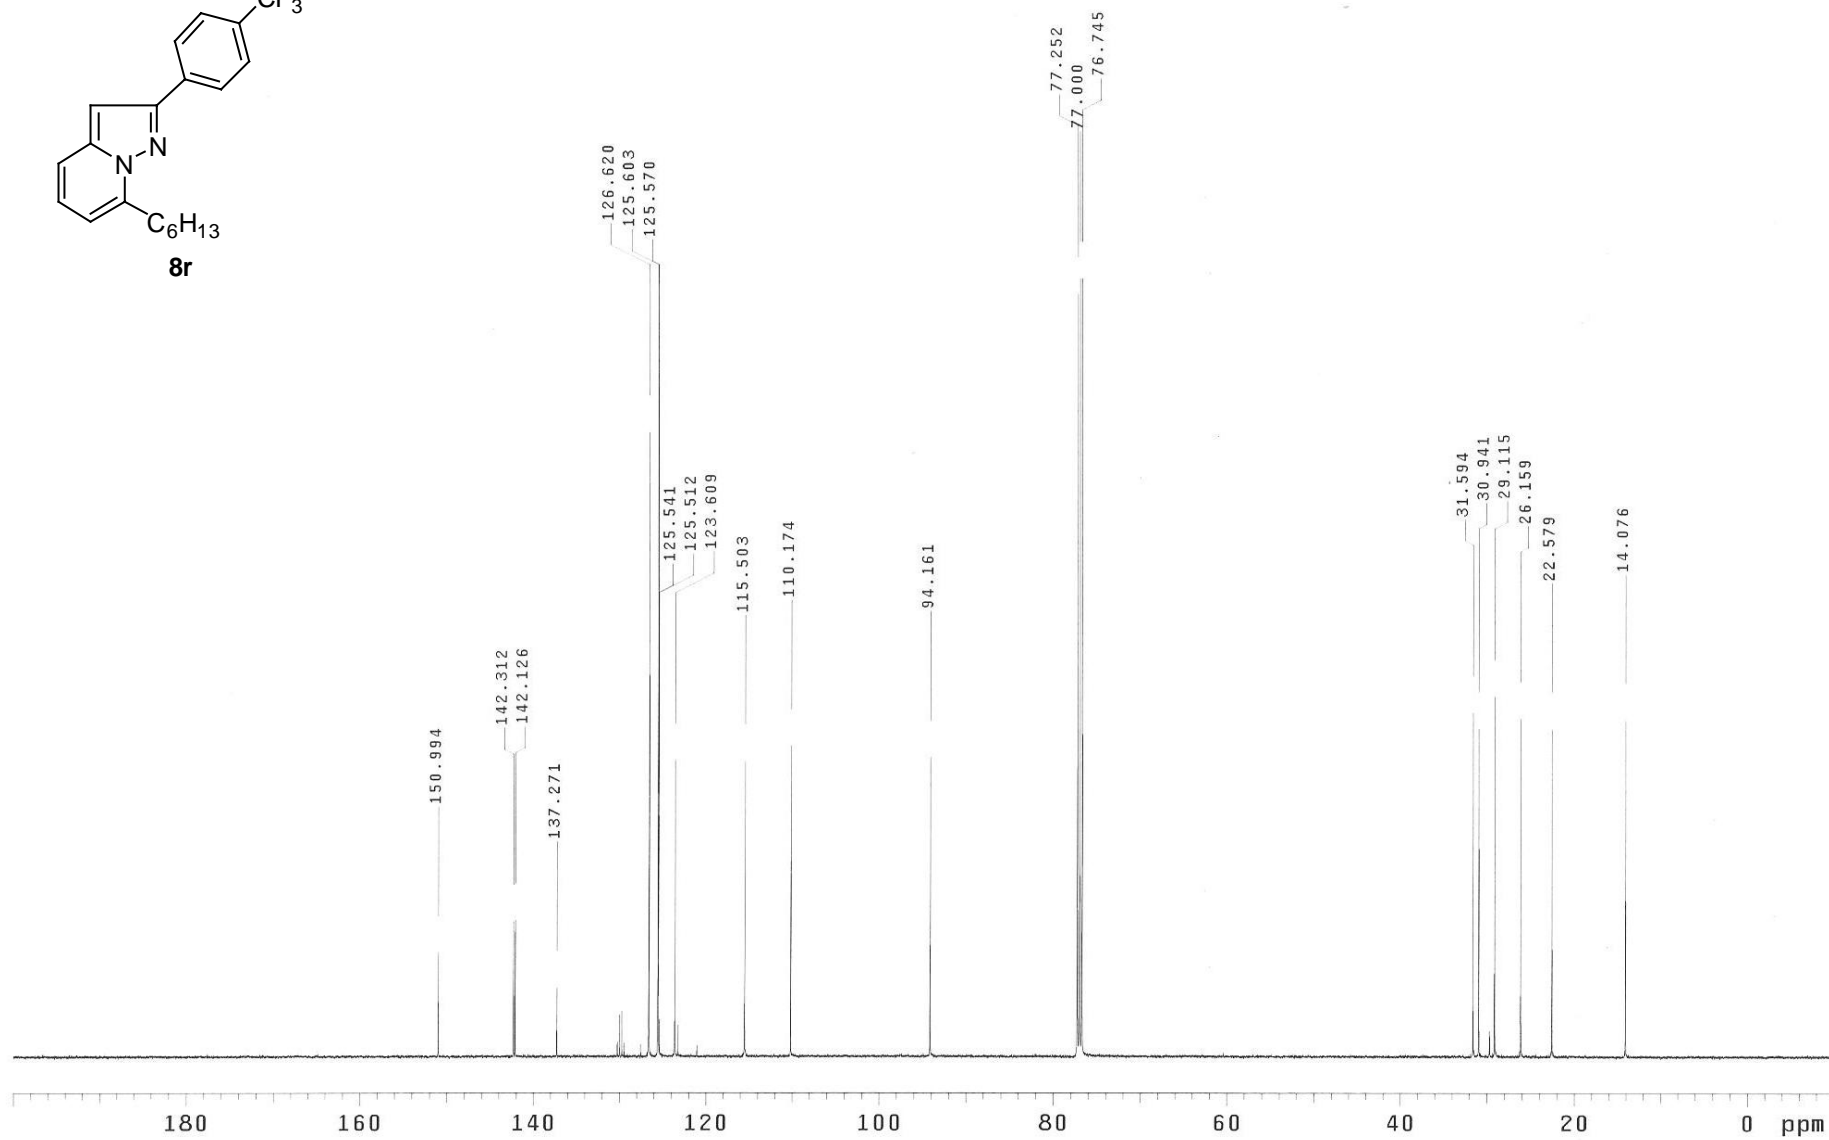

Supplement: c0ob00756k.pdf [file c0ob00756k.pdf]
